# Supplementary material for: Genome-scale metabolic models for natural and long-term drug-induced viral control in HIV infection
Source: PubMed Central journal article supplement (PMC9095731; doi:10.26508/lsa.202201405), 2022-05-10

### Replicate 1

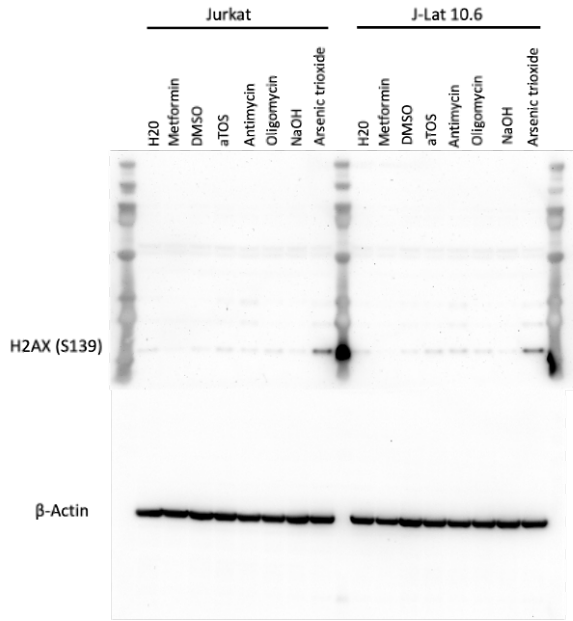

### Replicate 2

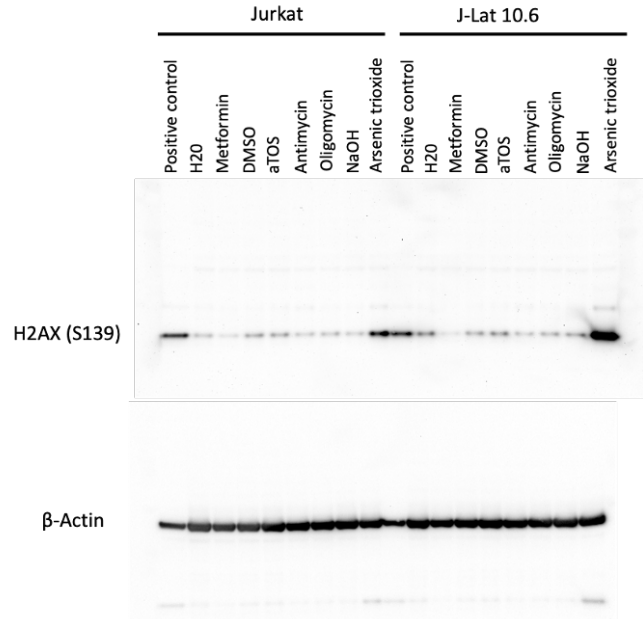

### Replicate 3

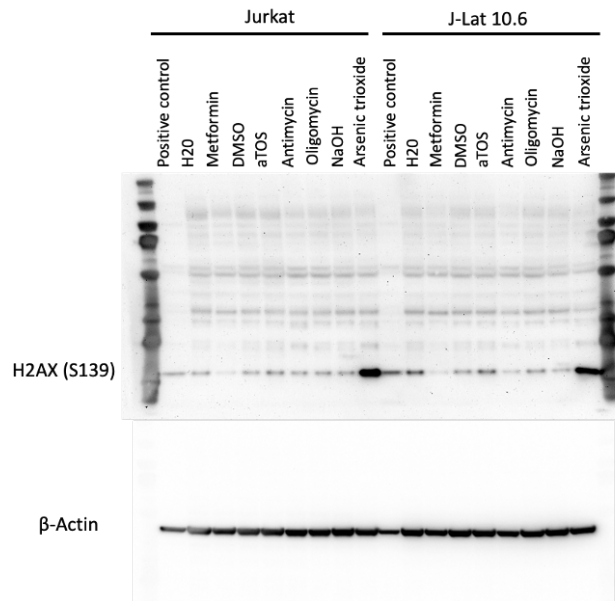

Supplement: LSA-2022-01405_SdataF5.pdf [file LSA-2022-01405_SdataF5.pdf]
