# Supplementary material for: Genome-scale metabolic models for natural and long-term drug-induced viral control in HIV infection
Source: Life Sci Alliance. 2022 May 10;5(9):e202201405. doi: 10.26508/lsa.202201405 (PMC9095731; doi:10.26508/lsa.202201405)
Supplement: Supplementary file 2 [file LSA-2022-01405_Supplementary_Data_1.xlsx]

## Sheet: EC_vs_ART
ID	GeneName	BioType	baseMean	log2FoldChange	lfcSE	stat	pvalue	padj	Significance
ENSG00000162572	SCNN1D	protein_coding	112.761	-1.17791	0.335477	-3.51116	0.000446157	0.0134329	Down Regulated in ART
ENSG00000008130	NADK	protein_coding	2757.57	-0.705892	0.235172	-3.0016	0.00268566	0.0453788	Down Regulated in ART
ENSG00000157933	SKI	protein_coding	1229.33	-0.58673	0.152619	-3.84441	0.00012084	0.00548127	Down Regulated in ART
ENSG00000116198	CEP104	protein_coding	788.014	-0.450249	0.0936344	-4.80859	1.52001e-06	0.000215318	Down Regulated in ART
ENSG00000198912	C1orf174	protein_coding	689.687	0.660642	0.177525	3.72141	0.000198112	0.00792165	Up Regulated in ART
ENSG00000171735	CAMTA1	protein_coding	355.518	0.518194	0.150158	3.45099	0.000558529	0.0155685	Up Regulated in ART
ENSG00000116288	PARK7	protein_coding	2959.05	0.388521	0.108225	3.58993	0.000330762	0.0109928	Up Regulated in ART
ENSG00000171612	SLC25A33	protein_coding	236.14	0.916489	0.234013	3.9164	8.98809e-05	0.00442542	Up Regulated in ART
ENSG00000159363	ATP13A2	protein_coding	766.845	-0.881148	0.219975	-4.00568	6.18395e-05	0.00343637	Down Regulated in ART
ENSG00000127481	UBR4	protein_coding	3649.45	-0.544529	0.173883	-3.13159	0.00173864	0.0338368	Down Regulated in ART
ENSG00000142676	RPL11	protein_coding	47962.1	0.850944	0.187564	4.53682	5.7108e-06	0.000567977	Up Regulated in ART
ENSG00000189266	PNRC2	protein_coding	3055.14	0.478259	0.143451	3.33395	0.000856217	0.021169	Up Regulated in ART
ENSG00000117614	SYF2	protein_coding	2164.74	0.566688	0.147795	3.83429	0.00012593	0.00556604	Up Regulated in ART
ENSG00000175087	PDIK1L	protein_coding	234.388	0.783315	0.253917	3.08493	0.00203599	0.0375116	Up Regulated in ART
ENSG00000169442	CD52	protein_coding	16412.1	0.679717	0.207681	3.27289	0.00106455	0.0242711	Up Regulated in ART
ENSG00000117713	ARID1A	protein_coding	3720.09	-0.53499	0.117929	-4.53654	5.71855e-06	0.000567977	Down Regulated in ART
ENSG00000126705	AHDC1	protein_coding	262.997	-1.15443	0.29184	-3.9557	7.63101e-05	0.00396034	Down Regulated in ART
ENSG00000130772	MED18	protein_coding	123.112	0.762557	0.221011	3.45032	0.000559926	0.0155824	Up Regulated in ART
ENSG00000084623	EIF3I	protein_coding	3096.46	0.371079	0.112059	3.31145	0.000928148	0.0223091	Up Regulated in ART
ENSG00000176261	ZBTB8OS	protein_coding	533.344	0.436334	0.124597	3.50195	0.00046186	0.0138094	Up Regulated in ART
ENSG00000163866	SMIM12	protein_coding	905.368	0.648225	0.0966155	6.70933	1.95519e-11	3.7544e-08	Up Regulated in ART
ENSG00000163867	ZMYM6	protein_coding	485.03	-0.669975	0.182658	-3.66792	0.000244528	0.00904911	Down Regulated in ART
ENSG00000020129	NCDN	protein_coding	374.277	-0.70668	0.235594	-2.99956	0.00270368	0.0454966	Down Regulated in ART
ENSG00000116863	ADPRHL2	protein_coding	522.93	0.679137	0.159626	4.25456	2.09463e-05	0.00154121	Up Regulated in ART
ENSG00000116898	MRPS15	protein_coding	861.852	0.439746	0.141289	3.11239	0.00185578	0.0353601	Up Regulated in ART
ENSG00000163873	GRIK3	protein_coding	5.69214	-4.32233	1.44953	-2.98187	0.00286492	0.0473795	Down Regulated in ART
ENSG00000168653	NDUFS5	protein_coding	1647.18	0.911292	0.20757	4.39028	1.13205e-05	0.000945123	Up Regulated in ART
ENSG00000084073	ZMPSTE24	protein_coding	570.387	-0.623674	0.196736	-3.17011	0.00152382	0.030842	Down Regulated in ART
ENSG00000171960	PPIH	protein_coding	577.075	1.0172	0.165697	6.13892	8.30865e-10	8.44648e-07	Up Regulated in ART
ENSG00000065978	YBX1	protein_coding	11743.2	0.372605	0.111278	3.34841	0.000812756	0.0204158	Up Regulated in ART
ENSG00000164008	C1orf50	protein_coding	155.107	1.14492	0.286629	3.99444	6.48473e-05	0.00358048	Up Regulated in ART
ENSG00000177868	SVBP	protein_coding	402.322	0.820216	0.179288	4.57484	4.76584e-06	0.000493193	Up Regulated in ART
ENSG00000117408	IPO13	protein_coding	578.582	-0.48132	0.141776	-3.39493	0.000686468	0.0181956	Down Regulated in ART
ENSG00000142945	KIF2C	protein_coding	36.0917	1.5689	0.474553	3.30606	0.000946177	0.0226166	Up Regulated in ART
ENSG00000142937	RPS8	protein_coding	41915.2	0.752925	0.211222	3.56462	0.000364381	0.0117424	Up Regulated in ART
ENSG00000132773	TOE1	protein_coding	487.893	1.05994	0.283333	3.74099	0.000183299	0.00744855	Up Regulated in ART
ENSG00000173660	UQCRH	protein_coding	2380.41	0.793416	0.14609	5.43101	5.60355e-08	2.05491e-05	Up Regulated in ART
ENSG00000185104	FAF1	protein_coding	832.253	0.270329	0.0826669	3.2701	0.00107509	0.024447	Up Regulated in ART
ENSG00000123080	CDKN2C	protein_coding	117.461	0.73241	0.23925	3.06127	0.00220397	0.0394704	Up Regulated in ART
ENSG00000117862	TXNDC12	protein_coding	129.749	-0.905894	0.227559	-3.98092	6.86488e-05	0.00369592	Down Regulated in ART
ENSG00000198841	KTI12	protein_coding	158.869	0.721785	0.212675	3.39384	0.000689208	0.0182403	Up Regulated in ART
ENSG00000162385	MAGOH	protein_coding	777.995	0.664754	0.137858	4.82202	1.42109e-06	0.000205736	Up Regulated in ART
ENSG00000116209	TMEM59	protein_coding	3210.23	0.462581	0.114744	4.03143	5.54396e-05	0.00318506	Up Regulated in ART
ENSG00000122420	PTGFR	protein_coding	3.09125	-5.20902	1.58665	-3.28304	0.00102694	0.0236634	Down Regulated in ART
ENSG00000117133	RPF1	protein_coding	1005.57	0.839138	0.180906	4.63854	3.50879e-06	0.000388711	Up Regulated in ART
ENSG00000174021	GNG5	protein_coding	144.282	-1.80734	0.369489	-4.89145	1.00094e-06	0.00016633	Down Regulated in ART
ENSG00000097096	SYDE2	protein_coding	59.2094	1.73456	0.468551	3.70196	0.000213937	0.00834889	Up Regulated in ART
ENSG00000137947	GTF2B	protein_coding	878.091	1.13558	0.239781	4.73593	2.18048e-06	0.000267256	Up Regulated in ART
ENSG00000213516	RBMXL1	protein_coding	573.139	0.685948	0.212635	3.22594	0.00125558	0.0273286	Up Regulated in ART
ENSG00000122406	RPL5	protein_coding	37656.2	0.655267	0.185082	3.54042	0.000399493	0.0124173	Up Regulated in ART
ENSG00000271092	TMEM56-RWDD3	protein_coding	4.31265	-2.40824	0.753854	-3.19458	0.00140037	0.0294418	Down Regulated in ART
ENSG00000162688	AGL	protein_coding	476.2	-0.653731	0.202576	-3.22709	0.00125057	0.0272882	Down Regulated in ART
ENSG00000117620	SLC35A3	protein_coding	413.297	-0.914791	0.235785	-3.87977	0.000104554	0.00492	Down Regulated in ART
ENSG00000162695	SLC30A7	protein_coding	565.57	-0.62224	0.199695	-3.11596	0.00183347	0.0351042	Down Regulated in ART
ENSG00000168765	GSTM4	protein_coding	321.301	1.34732	0.414481	3.25062	0.00115155	0.0255798	Up Regulated in ART
ENSG00000134248	LAMTOR5	protein_coding	1127.06	0.605232	0.1542	3.92498	8.67357e-05	0.00431979	Up Regulated in ART
ENSG00000116752	BCAS2	protein_coding	659.407	0.845385	0.237624	3.55766	0.000374168	0.0118966	Up Regulated in ART
ENSG00000266472	MRPS21	protein_coding	1277.14	0.708004	0.14251	4.9681	6.76138e-07	0.000121719	Up Regulated in ART
ENSG00000143420	ENSA	protein_coding	3107.31	0.550348	0.104693	5.25675	1.46623e-07	3.8393e-05	Up Regulated in ART
ENSG00000197622	CDC42SE1	protein_coding	15729.4	0.477455	0.0896015	5.32864	9.89495e-08	2.94835e-05	Up Regulated in ART
ENSG00000159377	PSMB4	protein_coding	4276.25	0.51916	0.107076	4.84852	1.24385e-06	0.000191931	Up Regulated in ART
ENSG00000143436	MRPL9	protein_coding	936.553	0.629582	0.138748	4.53758	5.69024e-06	0.000567977	Up Regulated in ART
ENSG00000197747	S100A10	protein_coding	5299.77	0.62945	0.209709	3.00154	0.00268618	0.0453788	Up Regulated in ART
ENSG00000196154	S100A4	protein_coding	20319.9	0.568135	0.182416	3.11451	0.00184253	0.0352241	Up Regulated in ART
ENSG00000160679	CHTOP	protein_coding	1920.02	0.316678	0.0824496	3.84087	0.0001226	0.00550051	Up Regulated in ART
ENSG00000143621	ILF2	protein_coding	3009.86	0.645012	0.132421	4.87092	1.11079e-06	0.000176116	Up Regulated in ART
ENSG00000177954	RPS27	protein_coding	78384.4	1.15053	0.26476	4.34555	1.38928e-05	0.00110643	Up Regulated in ART
ENSG00000160691	SHC1	protein_coding	1389.54	-0.301436	0.0937228	-3.21625	0.00129875	0.0279515	Down Regulated in ART
ENSG00000160752	FDPS	protein_coding	1563.38	0.353709	0.107619	3.28667	0.00101379	0.0234857	Up Regulated in ART
ENSG00000132676	DAP3	protein_coding	2843	0.355992	0.112047	3.17717	0.00148721	0.0303447	Up Regulated in ART
ENSG00000163479	SSR2	protein_coding	7459.03	0.640319	0.146381	4.37433	1.21807e-05	0.00100055	Up Regulated in ART
ENSG00000158710	TAGLN2	protein_coding	16454.2	0.609496	0.194479	3.134	0.00172442	0.033674	Up Regulated in ART
ENSG00000117091	CD48	protein_coding	14312.9	0.544139	0.132493	4.10694	4.00941e-05	0.00251053	Up Regulated in ART
ENSG00000186517	ARHGAP30	protein_coding	10466.5	-0.297975	0.0963744	-3.09185	0.00198915	0.0370038	Down Regulated in ART
ENSG00000158796	DEDD	protein_coding	998.298	0.538166	0.107696	4.99707	5.82092e-07	0.000109345	Up Regulated in ART
ENSG00000143222	UFC1	protein_coding	2428.04	0.641796	0.138002	4.65063	3.3092e-06	0.000368965	Up Regulated in ART
ENSG00000162747	FCGR3B	protein_coding	78.4598	-4.25868	1.19477	-3.56443	0.000364642	0.0117424	Down Regulated in ART
ENSG00000143198	MGST3	protein_coding	809.244	0.511321	0.140741	3.63308	0.00028006	0.00996429	Up Regulated in ART
ENSG00000135845	PIGC	protein_coding	777.463	0.838366	0.126118	6.64748	2.98163e-11	5.15285e-08	Up Regulated in ART
ENSG00000135823	STX6	protein_coding	655.404	-0.507074	0.162719	-3.11625	0.00183167	0.0351042	Down Regulated in ART
ENSG00000135829	DHX9	protein_coding	4586.63	0.471712	0.098474	4.79022	1.66598e-06	0.000226705	Up Regulated in ART
ENSG00000162704	ARPC5	protein_coding	4932.54	-0.607867	0.198151	-3.06769	0.00215718	0.0390566	Down Regulated in ART
ENSG00000116406	EDEM3	protein_coding	989.69	-0.622464	0.199204	-3.12475	0.00177956	0.034478	Down Regulated in ART
ENSG00000231767	AL136454.1	protein_coding	35.7589	1.34073	0.393015	3.4114	0.000646304	0.0173979	Up Regulated in ART
ENSG00000151414	NEK7	protein_coding	1274.64	-0.741195	0.237525	-3.1205	0.00180545	0.0348234	Down Regulated in ART
ENSG00000162702	ZNF281	protein_coding	643.87	0.727092	0.218537	3.32709	0.000877595	0.0214755	Up Regulated in ART
ENSG00000058673	ZC3H11A	protein_coding	10.9085	-1.85016	0.609659	-3.03474	0.00240743	0.0420885	Down Regulated in ART
ENSG00000182004	SNRPE	protein_coding	853.449	0.812287	0.128692	6.31185	2.75716e-10	3.40352e-07	Up Regulated in ART
ENSG00000117625	RCOR3	protein_coding	914.377	-0.508277	0.146847	-3.46126	0.000537647	0.015229	Down Regulated in ART
ENSG00000117691	NENF	protein_coding	492.791	0.841082	0.21898	3.84091	0.000122577	0.00550051	Up Regulated in ART
ENSG00000163041	H3F3A	protein_coding	7291.36	0.619015	0.148216	4.17645	2.96094e-05	0.00197571	Up Regulated in ART
ENSG00000135766	EGLN1	protein_coding	1011.34	-0.576729	0.174693	-3.30139	0.000962056	0.0228383	Down Regulated in ART
ENSG00000116918	TSNAX	protein_coding	594.949	-0.872508	0.214313	-4.0712	4.67724e-05	0.00279696	Down Regulated in ART
ENSG00000284770	TBCE	protein_coding	36.5599	-1.3685	0.417428	-3.27842	0.00104392	0.0238953	Down Regulated in ART
ENSG00000162851	TFB2M	protein_coding	236.043	0.624863	0.169464	3.68729	0.000226656	0.00859006	Up Regulated in ART
ENSG00000188295	ZNF669	protein_coding	201.485	1.12512	0.253815	4.43283	9.3005e-06	0.000824263	Up Regulated in ART
ENSG00000143727	ACP1	protein_coding	1797.92	0.302704	0.0917078	3.30074	0.000964298	0.0228601	Up Regulated in ART
ENSG00000171863	RPS7	protein_coding	32112.3	0.864879	0.19437	4.44966	8.60046e-06	0.000779646	Up Regulated in ART
ENSG00000134330	IAH1	protein_coding	734.193	0.447754	0.129119	3.46777	0.000524789	0.0149894	Up Regulated in ART
ENSG00000183891	TTC32	protein_coding	379.386	0.55751	0.131939	4.22551	2.38402e-05	0.00168855	Up Regulated in ART
ENSG00000115128	SF3B6	protein_coding	1159.37	0.500099	0.1516	3.29881	0.000970955	0.0228871	Up Regulated in ART
ENSG00000084733	RAB10	protein_coding	1959.03	-0.901858	0.251145	-3.59099	0.000329423	0.0109693	Down Regulated in ART
ENSG00000228474	OST4	protein_coding	3816.27	1.06864	0.210331	5.08077	3.75907e-07	8.02028e-05	Up Regulated in ART
ENSG00000138080	EMILIN1	protein_coding	14.5401	-2.68674	0.53508	-5.02119	5.13526e-07	9.75248e-05	Down Regulated in ART
ENSG00000138085	ATRAID	protein_coding	1685.41	0.550316	0.123274	4.46415	8.03861e-06	0.000735043	Up Regulated in ART
ENSG00000243147	MRPL33	protein_coding	779.306	0.814765	0.182423	4.46636	7.95632e-06	0.000731389	Up Regulated in ART
ENSG00000163811	WDR43	protein_coding	858.488	0.667302	0.18122	3.68227	0.000231167	0.00872277	Up Regulated in ART
ENSG00000162959	MEMO1	protein_coding	35.317	-0.973054	0.292783	-3.32346	0.000889082	0.0216734	Down Regulated in ART
ENSG00000021574	SPAST	protein_coding	634.01	-0.688795	0.197075	-3.49508	0.000473917	0.0140004	Down Regulated in ART
ENSG00000091106	NLRC4	protein_coding	472.851	-1.09796	0.359363	-3.05529	0.0022484	0.0401829	Down Regulated in ART
ENSG00000205221	VIT	protein_coding	10.7875	-3.05041	0.854234	-3.57093	0.000355723	0.0115992	Down Regulated in ART
ENSG00000115816	CEBPZ	protein_coding	1214.88	0.538666	0.167171	3.22225	0.00127188	0.0275414	Up Regulated in ART
ENSG00000115904	SOS1	protein_coding	1764.65	-0.800264	0.178641	-4.47974	7.47341e-06	0.000694384	Down Regulated in ART
ENSG00000115970	THADA	protein_coding	841.431	0.384753	0.117914	3.263	0.00110241	0.0246718	Up Regulated in ART
ENSG00000138032	PPM1B	protein_coding	454.637	-0.710486	0.211513	-3.35906	0.000782076	0.0199055	Down Regulated in ART
ENSG00000138078	PREPL	protein_coding	425.807	-0.825445	0.270529	-3.05123	0.00227907	0.0405215	Down Regulated in ART
ENSG00000116062	MSH6	protein_coding	623.106	0.562579	0.124147	4.53154	5.8556e-06	0.000578265	Up Regulated in ART
ENSG00000143947	RPS27A	protein_coding	46605.7	0.971633	0.208087	4.66935	3.02152e-06	0.000350455	Up Regulated in ART
ENSG00000082898	XPO1	protein_coding	3209.95	-0.629229	0.204154	-3.08213	0.00205526	0.0377861	Down Regulated in ART
ENSG00000173163	COMMD1	protein_coding	333.788	0.591738	0.143212	4.13191	3.59755e-05	0.00228577	Up Regulated in ART
ENSG00000138071	ACTR2	protein_coding	10621.9	-0.677159	0.201049	-3.36813	0.000756797	0.0194522	Down Regulated in ART
ENSG00000087338	GMCL1	protein_coding	546.254	-0.730076	0.2205	-3.31101	0.000929607	0.0223131	Down Regulated in ART
ENSG00000143977	SNRPG	protein_coding	721.044	0.931304	0.190875	4.87912	1.0656e-06	0.000172109	Up Regulated in ART
ENSG00000204843	DCTN1	protein_coding	2048.27	-0.336367	0.0953781	-3.52667	0.000420817	0.0128264	Down Regulated in ART
ENSG00000115289	PCGF1	protein_coding	313.498	0.565483	0.163001	3.4692	0.000522008	0.014936	Up Regulated in ART
ENSG00000034510	TMSB10	protein_coding	42391.3	0.775475	0.184224	4.20942	2.56032e-05	0.00177701	Up Regulated in ART
ENSG00000176407	KCMF1	protein_coding	1468.45	0.415065	0.115157	3.60434	0.000312944	0.0106463	Up Regulated in ART
ENSG00000168894	RNF181	protein_coding	1087.45	0.614309	0.16263	3.77735	0.000158504	0.00668113	Up Regulated in ART
ENSG00000172071	EIF2AK3	protein_coding	756.478	0.638993	0.205006	3.11695	0.00182735	0.0350893	Up Regulated in ART
ENSG00000040933	INPP4A	protein_coding	3051.25	-0.592077	0.134054	-4.4167	1.0022e-05	0.000870357	Down Regulated in ART
ENSG00000071082	RPL31	protein_coding	33102	1.24489	0.223215	5.57709	2.44569e-08	9.82939e-06	Up Regulated in ART
ENSG00000115652	UXS1	protein_coding	1012.33	0.404966	0.127747	3.17006	0.00152407	0.030842	Up Regulated in ART
ENSG00000169756	LIMS1	protein_coding	1747.36	-0.705458	0.233551	-3.02057	0.002523	0.0436025	Down Regulated in ART
ENSG00000169607	CKAP2L	protein_coding	15.9722	1.87573	0.609193	3.07904	0.00207666	0.0380269	Up Regulated in ART
ENSG00000115084	SLC35F5	protein_coding	525.314	-0.810879	0.195153	-4.15509	3.25166e-05	0.00213257	Down Regulated in ART
ENSG00000155368	DBI	protein_coding	1933.52	0.682322	0.142575	4.78571	1.70382e-06	0.000230042	Up Regulated in ART
ENSG00000155438	NIFK	protein_coding	572.571	0.618418	0.134891	4.58457	4.54927e-06	0.000473618	Up Regulated in ART
ENSG00000173349	SFT2D3	protein_coding	231.94	0.599195	0.186526	3.2124	0.00131632	0.0282374	Up Regulated in ART
ENSG00000144231	POLR2D	protein_coding	492.094	0.413008	0.133488	3.09398	0.00197491	0.0367785	Up Regulated in ART
ENSG00000075884	ARHGAP15	protein_coding	2090.52	0.615459	0.165021	3.72958	0.000191799	0.00772651	Up Regulated in ART
ENSG00000162980	ARL5A	protein_coding	543.028	-0.729399	0.229611	-3.17667	0.00148977	0.030361	Down Regulated in ART
ENSG00000177917	ARL6IP6	protein_coding	373.06	-0.681213	0.167536	-4.06608	4.7811e-05	0.00282969	Down Regulated in ART
ENSG00000115165	CYTIP	protein_coding	4901.48	0.742203	0.186349	3.98287	6.80879e-05	0.00367717	Up Regulated in ART
ENSG00000054219	LY75	protein_coding	552.789	-0.972815	0.246508	-3.94638	7.93414e-05	0.00403288	Down Regulated in ART
ENSG00000138433	CIR1	protein_coding	1034.22	0.640746	0.148114	4.32603	1.51821e-05	0.00119097	Up Regulated in ART
ENSG00000115935	WIPF1	protein_coding	8442.39	-0.450868	0.124067	-3.63408	0.000278972	0.00996429	Down Regulated in ART
ENSG00000154518	ATP5MC3	protein_coding	2056.73	0.702912	0.146317	4.80404	1.55494e-06	0.000216714	Up Regulated in ART
ENSG00000128654	MTX2	protein_coding	250.792	0.364975	0.114487	3.18793	0.00143296	0.0298007	Up Regulated in ART
ENSG00000065548	ZC3H15	protein_coding	1627.18	0.522023	0.149437	3.49327	0.000477143	0.0140238	Up Regulated in ART
ENSG00000138448	ITGAV	protein_coding	270.049	-0.932709	0.250207	-3.72774	0.000193202	0.00776492	Down Regulated in ART
ENSG00000064933	PMS1	protein_coding	502.683	-0.557954	0.17764	-3.14093	0.00168413	0.0331494	Down Regulated in ART
ENSG00000115419	GLS	protein_coding	1711.98	-0.75769	0.214094	-3.53906	0.000401558	0.012422	Down Regulated in ART
ENSG00000115520	COQ10B	protein_coding	754.568	0.894576	0.27605	3.24063	0.00119264	0.0263233	Up Regulated in ART
ENSG00000247626	MARS2	protein_coding	147.288	0.626219	0.192989	3.24484	0.00117518	0.0260045	Up Regulated in ART
ENSG00000226124	FTCDNL1	protein_coding	38.9432	0.94072	0.303849	3.09601	0.00196141	0.0366851	Up Regulated in ART
ENSG00000162972	MAIP1	protein_coding	145.644	0.77622	0.23607	3.28809	0.0010087	0.0234362	Up Regulated in ART
ENSG00000119013	NDUFB3	protein_coding	558.4	0.577227	0.190062	3.03704	0.00238911	0.0419573	Up Regulated in ART
ENSG00000055044	NOP58	protein_coding	1724.93	0.565077	0.157342	3.5914	0.000328904	0.0109693	Up Regulated in ART
ENSG00000114933	INO80D	protein_coding	867.067	-0.736801	0.203438	-3.62175	0.000292611	0.0102392	Down Regulated in ART
ENSG00000114942	EEF1B2	protein_coding	18991.9	0.957441	0.222999	4.29348	1.75895e-05	0.00133325	Up Regulated in ART
ENSG00000197756	RPL37A	protein_coding	29528.1	1.14661	0.203543	5.63325	1.76849e-08	7.87209e-06	Up Regulated in ART
ENSG00000180871	CXCR2	protein_coding	124.725	-1.36685	0.400537	-3.41256	0.000643566	0.0173783	Down Regulated in ART
ENSG00000179921	GPBAR1	protein_coding	434.055	-1.15094	0.377632	-3.04778	0.00230542	0.0408219	Down Regulated in ART
ENSG00000135926	TMBIM1	protein_coding	3307.06	0.449231	0.133763	3.35841	0.000783922	0.0199232	Up Regulated in ART
ENSG00000163482	STK36	protein_coding	382.065	-0.470071	0.133416	-3.52335	0.000426124	0.0129653	Down Regulated in ART
ENSG00000115661	STK16	protein_coding	776.889	0.384244	0.107804	3.56427	0.000364868	0.0117424	Up Regulated in ART
ENSG00000221944	TIGD1	protein_coding	259.94	0.904039	0.24735	3.6549	0.000257281	0.00938044	Up Regulated in ART
ENSG00000113851	CRBN	protein_coding	1721.46	0.53945	0.150767	3.57804	0.000346182	0.0113095	Up Regulated in ART
ENSG00000170364	SETMAR	protein_coding	139.901	0.730732	0.196457	3.71955	0.000199581	0.00792912	Up Regulated in ART
ENSG00000134077	THUMPD3	protein_coding	566.497	0.437723	0.14291	3.06292	0.00219189	0.0393765	Up Regulated in ART
ENSG00000171135	JAGN1	protein_coding	485.42	0.413728	0.127368	3.24828	0.00116105	0.0257246	Up Regulated in ART
ENSG00000144713	RPL32	protein_coding	43951.8	0.909708	0.215878	4.214	2.5089e-05	0.00175542	Up Regulated in ART
ENSG00000132182	NUP210	protein_coding	7073.66	-0.481475	0.146021	-3.29731	0.000976159	0.0229524	Down Regulated in ART
ENSG00000170860	LSM3	protein_coding	735.149	0.69161	0.1181	5.85616	4.73682e-09	2.94723e-06	Up Regulated in ART
ENSG00000154781	CCDC174	protein_coding	480.615	0.55978	0.156012	3.58805	0.000333159	0.011021	Up Regulated in ART
ENSG00000154814	OXNAD1	protein_coding	1431.95	0.946928	0.265644	3.56465	0.000364346	0.0117424	Up Regulated in ART
ENSG00000174748	RPL15	protein_coding	36984.9	0.552187	0.159852	3.45437	0.000551576	0.0154131	Up Regulated in ART
ENSG00000033867	SLC4A7	protein_coding	763.114	-0.917763	0.236291	-3.88403	0.000102739	0.00487782	Down Regulated in ART
ENSG00000170248	PDCD6IP	protein_coding	2983.34	-0.560674	0.177502	-3.15869	0.00158478	0.0316992	Down Regulated in ART
ENSG00000178567	EPM2AIP1	protein_coding	694.953	0.747158	0.198481	3.76439	0.000166957	0.00695264	Up Regulated in ART
ENSG00000168028	RPSA	protein_coding	40006.1	0.853859	0.208652	4.09225	4.27204e-05	0.00263474	Up Regulated in ART
ENSG00000114784	EIF1B	protein_coding	1019.07	0.929284	0.190133	4.88755	1.02099e-06	0.000168046	Up Regulated in ART
ENSG00000188846	RPL14	protein_coding	23310.7	0.868183	0.207679	4.18041	2.90981e-05	0.00194912	Up Regulated in ART
ENSG00000168038	ULK4	protein_coding	146.281	0.861904	0.234553	3.67467	0.000238159	0.00888957	Up Regulated in ART
ENSG00000169981	ZNF35	protein_coding	76.1852	0.890504	0.286693	3.10612	0.00189561	0.0358423	Up Regulated in ART
ENSG00000011376	LARS2	protein_coding	329.375	0.514434	0.17275	2.9779	0.00290228	0.0478599	Up Regulated in ART
ENSG00000160796	NBEAL2	protein_coding	7172.85	-0.817736	0.237087	-3.44909	0.000562479	0.0156095	Down Regulated in ART
ENSG00000232112	TMA7	protein_coding	3772.74	0.881734	0.230075	3.83237	0.000126912	0.00559514	Up Regulated in ART
ENSG00000283189	AC104452.1	protein_coding	16.9815	-1.60555	0.517876	-3.10025	0.00193356	0.0363216	Down Regulated in ART
ENSG00000114383	TUSC2	protein_coding	619.16	0.400993	0.115081	3.48445	0.000493156	0.0143722	Up Regulated in ART
ENSG00000010322	NISCH	protein_coding	2555.53	-0.444823	0.141816	-3.13661	0.00170914	0.0334132	Down Regulated in ART
ENSG00000163938	GNL3	protein_coding	1094	0.405687	0.129496	3.1328	0.00173146	0.0337351	Up Regulated in ART
ENSG00000213533	STIMATE	protein_coding	42.4934	-0.905656	0.275651	-3.28551	0.00101798	0.0235196	Down Regulated in ART
ENSG00000113811	SELENOK	protein_coding	1314.27	0.969898	0.289096	3.35494	0.000793834	0.0200865	Up Regulated in ART
ENSG00000163636	PSMD6	protein_coding	1305.19	0.497739	0.0901277	5.5226	3.34014e-08	1.28276e-05	Up Regulated in ART
ENSG00000144741	SLC25A26	protein_coding	416.76	0.611672	0.140202	4.3628	1.28408e-05	0.00103699	Up Regulated in ART
ENSG00000179021	C3orf38	protein_coding	759.669	0.76284	0.215148	3.54566	0.000391637	0.0122614	Up Regulated in ART
ENSG00000080819	CPOX	protein_coding	289.844	-1.0868	0.230569	-4.71357	2.43414e-06	0.000294642	Down Regulated in ART
ENSG00000174173	TRMT10C	protein_coding	331.024	0.944423	0.223307	4.22926	2.34464e-05	0.00166749	Up Regulated in ART
ENSG00000114391	RPL24	protein_coding	18294.1	1.05858	0.186711	5.66964	1.43099e-08	7.06563e-06	Up Regulated in ART
ENSG00000114446	IFT57	protein_coding	687.06	0.548817	0.155081	3.5389	0.000401801	0.012422	Up Regulated in ART
ENSG00000163606	CD200R1	protein_coding	193.85	-1.31366	0.400246	-3.28212	0.00103029	0.0236774	Down Regulated in ART
ENSG00000121578	B4GALT4	protein_coding	379.281	0.859147	0.145719	5.8959	3.72647e-09	2.47696e-06	Up Regulated in ART
ENSG00000065518	NDUFB4	protein_coding	938.643	0.426647	0.105498	4.04413	5.25185e-05	0.00308716	Up Regulated in ART
ENSG00000160124	CCDC58	protein_coding	117.364	0.837217	0.217958	3.84118	0.000122443	0.00550051	Up Regulated in ART
ENSG00000144909	OSBPL11	protein_coding	1192.92	-0.57367	0.189594	-3.02578	0.00247992	0.0429869	Down Regulated in ART
ENSG00000114554	PLXNA1	protein_coding	249.699	-0.829102	0.266875	-3.1067	0.00189186	0.0358106	Down Regulated in ART
ENSG00000172780	RAB43	protein_coding	27.3089	-1.41763	0.473828	-2.99186	0.00277282	0.0463441	Down Regulated in ART
ENSG00000034533	ASTE1	protein_coding	274.211	0.722884	0.223574	3.23331	0.00122366	0.0267777	Up Regulated in ART
ENSG00000175110	MRPS22	protein_coding	501.163	0.44724	0.123608	3.61822	0.00029664	0.0102884	Up Regulated in ART
ENSG00000114125	RNF7	protein_coding	990.499	0.533745	0.1782	2.9952	0.00274264	0.0460604	Up Regulated in ART
ENSG00000144935	TRPC1	protein_coding	58.0729	-0.941793	0.308287	-3.05492	0.00225121	0.0401916	Down Regulated in ART
ENSG00000169359	SLC33A1	protein_coding	145.485	-0.911195	0.29655	-3.07265	0.00212169	0.038597	Down Regulated in ART
ENSG00000163584	RPL22L1	protein_coding	847.761	0.721041	0.178831	4.03198	5.53101e-05	0.00318506	Up Regulated in ART
ENSG00000177565	TBL1XR1	protein_coding	1156.66	-0.666783	0.202675	-3.28991	0.00100219	0.0233736	Down Regulated in ART
ENSG00000136522	MRPL47	protein_coding	468.976	0.598981	0.165458	3.62014	0.000294449	0.0102801	Up Regulated in ART
ENSG00000161202	DVL3	protein_coding	1265.76	-0.401326	0.109306	-3.67159	0.000241048	0.00893948	Down Regulated in ART
ENSG00000136514	RTP4	protein_coding	116.952	0.859897	0.243676	3.52885	0.000417366	0.0127662	Up Regulated in ART
ENSG00000185798	WDR53	protein_coding	247.793	0.545443	0.165041	3.3049	0.000950118	0.022679	Up Regulated in ART
ENSG00000180370	PAK2	protein_coding	3528.36	-0.600434	0.170146	-3.52893	0.000417242	0.0127662	Down Regulated in ART
ENSG00000270170	NCBP2-AS2	protein_coding	467.203	1.10299	0.20729	5.32101	1.03193e-07	2.9723e-05	Up Regulated in ART
ENSG00000182899	RPL35A	protein_coding	18890.1	1.2146	0.204969	5.92576	3.10848e-09	2.20506e-06	Up Regulated in ART
ENSG00000169020	ATP5ME	protein_coding	1086.06	1.02246	0.282909	3.61409	0.000301403	0.0103762	Up Regulated in ART
ENSG00000178950	GAK	protein_coding	2075.18	-0.600637	0.199935	-3.00416	0.00266312	0.045276	Down Regulated in ART
ENSG00000163945	UVSSA	protein_coding	948.319	-0.851057	0.192153	-4.42907	9.46418e-06	0.00083449	Down Regulated in ART
ENSG00000197386	HTT	protein_coding	2189.27	-0.485783	0.124064	-3.91559	9.01845e-05	0.00442775	Down Regulated in ART
ENSG00000168826	ZBTB49	protein_coding	298.72	0.777551	0.217797	3.57007	0.000356883	0.0116152	Up Regulated in ART
ENSG00000179010	MRFAP1	protein_coding	2923.28	0.369183	0.121153	3.04724	0.00230953	0.040853	Up Regulated in ART
ENSG00000170846	AC093323.1	protein_coding	465.713	0.685786	0.208342	3.29164	0.000996052	0.0232933	Up Regulated in ART
ENSG00000178163	ZNF518B	protein_coding	554.983	0.5819	0.195	2.98411	0.00284405	0.0471928	Up Regulated in ART
ENSG00000118579	MED28	protein_coding	1341.67	0.407292	0.119379	3.41177	0.000645437	0.0173979	Up Regulated in ART
ENSG00000163257	DCAF16	protein_coding	616.379	0.698968	0.227075	3.07813	0.00208305	0.0380541	Up Regulated in ART
ENSG00000109819	PPARGC1A	protein_coding	8.92153	-3.67461	1.18598	-3.09837	0.00194589	0.0364738	Down Regulated in ART
ENSG00000038210	PI4K2B	protein_coding	202.567	-1.09302	0.334361	-3.26899	0.00107932	0.0244787	Down Regulated in ART
ENSG00000091490	SEL1L3	protein_coding	2538.25	0.642468	0.179165	3.58589	0.000335929	0.0110792	Up Regulated in ART
ENSG00000163682	RPL9	protein_coding	43336	1.06232	0.248899	4.26809	1.97153e-05	0.00146862	Up Regulated in ART
ENSG00000109814	UGDH	protein_coding	174.78	-0.884416	0.264926	-3.33835	0.000842763	0.0209563	Down Regulated in ART
ENSG00000168421	RHOH	protein_coding	2145.29	0.922042	0.258895	3.56145	0.000368818	0.0118254	Up Regulated in ART
ENSG00000145247	OCIAD2	protein_coding	615.375	0.689818	0.218907	3.15119	0.00162607	0.0323009	Up Regulated in ART
ENSG00000109220	CHIC2	protein_coding	312.794	0.823308	0.153401	5.36702	8.00489e-08	2.51528e-05	Up Regulated in ART
ENSG00000145241	CENPC	protein_coding	667.461	0.545647	0.169221	3.22447	0.00126205	0.0274004	Up Regulated in ART
ENSG00000132467	UTP3	protein_coding	641.995	0.356626	0.116349	3.06514	0.00217565	0.0391255	Up Regulated in ART
ENSG00000173542	MOB1B	protein_coding	535.683	-0.799276	0.238474	-3.35163	0.000803379	0.0202451	Down Regulated in ART
ENSG00000169288	MRPL1	protein_coding	337.636	0.653457	0.181534	3.59964	0.000318653	0.010798	Up Regulated in ART
ENSG00000138785	INTS12	protein_coding	468.974	0.720735	0.170148	4.23593	2.27605e-05	0.00163215	Up Regulated in ART
ENSG00000164022	AIMP1	protein_coding	1354.34	0.513235	0.133005	3.85877	0.000113961	0.00525191	Up Regulated in ART
ENSG00000109475	RPL34	protein_coding	25209.9	1.03402	0.257518	4.01532	5.93641e-05	0.00332705	Up Regulated in ART
ENSG00000174749	FAM241A	protein_coding	236.649	-0.789707	0.258676	-3.05288	0.00226659	0.0403827	Down Regulated in ART
ENSG00000138660	AP1AR	protein_coding	346.039	-0.756325	0.218962	-3.45414	0.00055206	0.0154131	Down Regulated in ART
ENSG00000164134	NAA15	protein_coding	821.016	0.690086	0.191043	3.61219	0.00030362	0.010411	Up Regulated in ART
ENSG00000151611	MMAA	protein_coding	146.683	0.656331	0.160236	4.09602	4.20305e-05	0.00260348	Up Regulated in ART
ENSG00000145425	RPS3A	protein_coding	70226.4	0.73724	0.21736	3.39178	0.000694391	0.0183493	Up Regulated in ART
ENSG00000183439	TRIM61	protein_coding	18.5599	1.77644	0.528353	3.36221	0.000773201	0.0197378	Up Regulated in ART
ENSG00000164117	FBXO8	protein_coding	195.401	1.09335	0.234403	4.66441	3.09503e-06	0.000356589	Up Regulated in ART
ENSG00000145476	CYP4V2	protein_coding	578.116	-0.924053	0.280853	-3.29016	0.00100129	0.0233736	Down Regulated in ART
ENSG00000109536	FRG1	protein_coding	759.957	0.536764	0.1292	4.15452	3.25964e-05	0.00213257	Up Regulated in ART
ENSG00000249915	PDCD6	protein_coding	265.353	-0.609557	0.169477	-3.5967	0.000322282	0.0108359	Down Regulated in ART
ENSG00000066230	SLC9A3	protein_coding	4.5183	-2.46429	0.723498	-3.40608	0.000659036	0.0176307	Down Regulated in ART
ENSG00000113460	BRIX1	protein_coding	539.845	0.640425	0.181871	3.52131	0.000429414	0.0130424	Up Regulated in ART
ENSG00000164187	LMBRD2	protein_coding	341.968	-0.924917	0.2423	-3.81724	0.000134953	0.00587472	Down Regulated in ART
ENSG00000082068	WDR70	protein_coding	621.155	0.539321	0.119235	4.52318	6.09172e-06	0.000598165	Up Regulated in ART
ENSG00000145592	RPL37	protein_coding	37055.2	1.06918	0.212386	5.03413	4.80025e-07	9.42704e-05	Up Regulated in ART
ENSG00000151882	CCL28	protein_coding	158.1	0.672286	0.213699	3.14595	0.00165547	0.0328057	Up Regulated in ART
ENSG00000164258	NDUFS4	protein_coding	541.257	0.606435	0.159526	3.80147	0.000143837	0.00616823	Up Regulated in ART
ENSG00000145632	PLK2	protein_coding	251.465	-1.86698	0.382814	-4.87699	1.07716e-06	0.000172365	Down Regulated in ART
ENSG00000253251	SHLD3	protein_coding	203.845	1.04342	0.317365	3.28775	0.00100992	0.0234362	Up Regulated in ART
ENSG00000134056	MRPS36	protein_coding	320.909	0.880254	0.173814	5.06433	4.09834e-07	8.50437e-05	Up Regulated in ART
ENSG00000134058	CDK7	protein_coding	319.41	0.637898	0.158785	4.01738	5.88484e-05	0.00332267	Up Regulated in ART
ENSG00000172062	SMN1	protein_coding	150.545	0.956989	0.261052	3.6659	0.000246472	0.00910156	Up Regulated in ART
ENSG00000113048	MRPS27	protein_coding	876.468	0.3307	0.103657	3.19033	0.00142109	0.0297253	Up Regulated in ART
ENSG00000145741	BTF3	protein_coding	11514.7	0.510748	0.128227	3.98315	6.8009e-05	0.00367717	Up Regulated in ART
ENSG00000171530	TBCA	protein_coding	1356.42	0.595297	0.164969	3.60853	0.000307941	0.0104967	Up Regulated in ART
ENSG00000186468	RPS23	protein_coding	38109.6	0.89561	0.188706	4.74607	2.07408e-06	0.000262279	Up Regulated in ART
ENSG00000127184	COX7C	protein_coding	4794.44	1.18349	0.174401	6.78602	1.15272e-11	2.49015e-08	Up Regulated in ART
ENSG00000134480	CCNH	protein_coding	631.851	0.70988	0.216943	3.27219	0.00106717	0.0242988	Up Regulated in ART
ENSG00000058729	RIOK2	protein_coding	406.04	0.539145	0.166963	3.22912	0.00124171	0.0271293	Up Regulated in ART
ENSG00000169567	HINT1	protein_coding	4211.08	1.14671	0.190349	6.02425	1.699e-09	1.39819e-06	Up Regulated in ART
ENSG00000164405	UQCRQ	protein_coding	980.717	0.812836	0.205676	3.95202	7.74946e-05	0.0039859	Up Regulated in ART
ENSG00000113583	C5orf15	protein_coding	727.613	-0.738863	0.190301	-3.88261	0.000103343	0.00489308	Down Regulated in ART
ENSG00000113615	SEC24A	protein_coding	591.144	-0.43738	0.118169	-3.7013	0.000214495	0.00834889	Down Regulated in ART
ENSG00000255833	TIFAB	protein_coding	26.4297	-1.42613	0.443964	-3.21226	0.00131694	0.0282374	Down Regulated in ART
ENSG00000120727	PAIP2	protein_coding	3101.32	0.562735	0.104821	5.36852	7.93873e-08	2.51528e-05	Up Regulated in ART
ENSG00000113068	PFDN1	protein_coding	1034.25	0.383169	0.12619	3.03645	0.00239381	0.0419573	Up Regulated in ART
ENSG00000254996	ANKHD1-EIF4EBP3	protein_coding	77.764	-0.938255	0.258981	-3.62287	0.000291354	0.0102341	Down Regulated in ART
ENSG00000243056	EIF4EBP3	protein_coding	24.4834	-1.71027	0.445475	-3.83921	0.000123432	0.00550051	Down Regulated in ART
ENSG00000178913	TAF7	protein_coding	3230.24	0.471131	0.142984	3.29501	0.000984199	0.0230786	Up Regulated in ART
ENSG00000164296	TIGD6	protein_coding	47.3744	1.22206	0.285099	4.28644	1.81556e-05	0.00136419	Up Regulated in ART
ENSG00000164587	RPS14	protein_coding	41877.1	0.681437	0.203679	3.34565	0.000820913	0.0205609	Up Regulated in ART
ENSG00000198624	CCDC69	protein_coding	7252.78	0.499932	0.139344	3.58776	0.000333526	0.011021	Up Regulated in ART
ENSG00000177556	ATOX1	protein_coding	437.728	0.579322	0.146718	3.94854	7.863e-05	0.00402036	Up Regulated in ART
ENSG00000155868	MED7	protein_coding	173.092	0.419955	0.118268	3.55087	0.000383963	0.0121089	Up Regulated in ART
ENSG00000164609	SLU7	protein_coding	1717.89	0.627643	0.150986	4.15695	3.22523e-05	0.00212742	Up Regulated in ART
ENSG00000181163	NPM1	protein_coding	11744.2	0.532489	0.167415	3.18066	0.00146942	0.0301597	Up Regulated in ART
ENSG00000145919	BOD1	protein_coding	354.326	0.531625	0.176696	3.00869	0.00262374	0.0448501	Up Regulated in ART
ENSG00000285476	AC139491.7	protein_coding	74.4316	-2.14748	0.611504	-3.51179	0.000445091	0.0134242	Down Regulated in ART
ENSG00000048162	NOP16	protein_coding	246.087	0.737281	0.216334	3.40807	0.000654252	0.0175299	Up Regulated in ART
ENSG00000146083	RNF44	protein_coding	2446.43	-0.583301	0.163741	-3.56233	0.000367572	0.0118074	Down Regulated in ART
ENSG00000087206	UIMC1	protein_coding	1260.65	0.36611	0.110895	3.3014	0.000962028	0.0228383	Up Regulated in ART
ENSG00000169228	RAB24	protein_coding	190.25	-0.950807	0.280795	-3.38613	0.000708867	0.018618	Down Regulated in ART
ENSG00000169230	PRELID1	protein_coding	3950.05	0.594115	0.196815	3.01865	0.00253905	0.0437923	Up Regulated in ART
ENSG00000214113	LYRM4	protein_coding	472.115	0.638755	0.199764	3.19754	0.00138604	0.0293548	Up Regulated in ART
ENSG00000225921	NOL7	protein_coding	751.363	0.559433	0.128953	4.33827	1.4361e-05	0.00113328	Up Regulated in ART
ENSG00000145996	CDKAL1	protein_coding	314.989	0.517422	0.138909	3.7249	0.000195395	0.00783485	Up Regulated in ART
ENSG00000204576	PRR3	protein_coding	252.605	0.455698	0.137576	3.31233	0.000925224	0.0222698	Up Regulated in ART
ENSG00000204469	PRRC2A	protein_coding	5010.98	-0.460995	0.1423	-3.23961	0.00119695	0.0263552	Down Regulated in ART
ENSG00000204444	APOM	protein_coding	69.1859	1.10747	0.322229	3.4369	0.000588409	0.0161667	Up Regulated in ART
ENSG00000204427	ABHD16A	protein_coding	121.296	-1.18807	0.175014	-6.78839	1.13394e-11	2.49015e-08	Down Regulated in ART
ENSG00000204410	MSH5	protein_coding	37.2808	-1.31277	0.389046	-3.37433	0.000739951	0.0191722	Down Regulated in ART
ENSG00000204389	HSPA1A	protein_coding	363.831	-1.50491	0.397961	-3.78154	0.000155858	0.00658569	Down Regulated in ART
ENSG00000204388	HSPA1B	protein_coding	102.796	-2.36598	0.37817	-6.25639	3.93987e-10	4.25555e-07	Down Regulated in ART
ENSG00000204387	C6orf48	protein_coding	429.152	-0.743345	0.230886	-3.21953	0.00128401	0.0277031	Down Regulated in ART
ENSG00000231500	RPS18	protein_coding	59320.7	1.10646	0.223374	4.95337	7.29394e-07	0.000125438	Up Regulated in ART
ENSG00000124507	PACSIN1	protein_coding	112.068	-0.887313	0.295416	-3.0036	0.00266804	0.045276	Down Regulated in ART
ENSG00000198755	RPL10A	protein_coding	27864.4	0.779123	0.205685	3.78794	0.000151901	0.00645002	Up Regulated in ART
ENSG00000112081	SRSF3	protein_coding	7816.61	0.548626	0.146611	3.74206	0.000182517	0.00744855	Up Regulated in ART
ENSG00000188056	TREML4	protein_coding	22.9534	-7.30316	2.44158	-2.99115	0.00277925	0.0464067	Down Regulated in ART
ENSG00000137413	TAF8	protein_coding	721.284	0.398224	0.133455	2.98396	0.00284544	0.0471928	Up Regulated in ART
ENSG00000124659	TBCC	protein_coding	854.013	0.727595	0.19554	3.72095	0.000198477	0.00792165	Up Regulated in ART
ENSG00000124733	MEA1	protein_coding	826.24	0.662599	0.180219	3.67664	0.000236326	0.00887868	Up Regulated in ART
ENSG00000124574	ABCC10	protein_coding	819.634	-0.465732	0.145342	-3.20438	0.00135354	0.0288433	Down Regulated in ART
ENSG00000171453	POLR1C	protein_coding	359.76	0.678917	0.163061	4.16358	3.13293e-05	0.00208243	Up Regulated in ART
ENSG00000124688	MAD2L1BP	protein_coding	458.874	0.700211	0.194311	3.60356	0.000313885	0.0106573	Up Regulated in ART
ENSG00000096080	MRPS18A	protein_coding	322.141	0.488343	0.161038	3.03248	0.00242555	0.042299	Up Regulated in ART
ENSG00000196284	SUPT3H	protein_coding	277.111	1.01335	0.23121	4.38281	1.17161e-05	0.00096879	Up Regulated in ART
ENSG00000112210	RAB23	protein_coding	25.4744	-1.31814	0.430035	-3.06519	0.00217534	0.0391255	Down Regulated in ART
ENSG00000146143	PRIM2	protein_coding	163.239	0.619444	0.168616	3.6737	0.000239064	0.00889199	Up Regulated in ART
ENSG00000119900	OGFRL1	protein_coding	3634.92	-0.847736	0.281031	-3.01652	0.00255691	0.0440125	Down Regulated in ART
ENSG00000156508	EEF1A1	protein_coding	462417	0.64453	0.152856	4.21657	2.48044e-05	0.00174256	Up Regulated in ART
ENSG00000112695	COX7A2	protein_coding	2138.18	0.975958	0.172737	5.64997	1.6048e-08	7.4957e-06	Up Regulated in ART
ENSG00000146282	RARS2	protein_coding	712.496	0.334639	0.111161	3.0104	0.00260902	0.044687	Up Regulated in ART
ENSG00000083099	LYRM2	protein_coding	664.007	0.527674	0.154298	3.41982	0.000626616	0.017027	Up Regulated in ART
ENSG00000081087	OSTM1	protein_coding	1044.31	-0.892401	0.194631	-4.5851	4.53769e-06	0.000473618	Down Regulated in ART
ENSG00000074935	TUBE1	protein_coding	270.244	-0.562112	0.17439	-3.22331	0.00126718	0.0274772	Down Regulated in ART
ENSG00000187189	TSPYL4	protein_coding	543.062	0.639142	0.166599	3.83642	0.000124843	0.00553214	Up Regulated in ART
ENSG00000189241	TSPYL1	protein_coding	1648.96	0.857646	0.238413	3.59731	0.000321528	0.0108317	Up Regulated in ART
ENSG00000047932	GOPC	protein_coding	670.922	-0.516852	0.172576	-2.99492	0.00274518	0.0460604	Down Regulated in ART
ENSG00000111877	MCM9	protein_coding	576.134	0.614682	0.199052	3.08805	0.00201476	0.0372397	Up Regulated in ART
ENSG00000203760	CENPW	protein_coding	55.763	1.1078	0.365109	3.03415	0.00241211	0.0421071	Up Regulated in ART
ENSG00000112306	RPS12	protein_coding	37535.9	0.954214	0.20908	4.56388	5.02173e-06	0.000513523	Up Regulated in ART
ENSG00000112339	HBS1L	protein_coding	717.321	0.606768	0.174252	3.48213	0.000497443	0.0144484	Up Regulated in ART
ENSG00000118513	MYB	protein_coding	191.938	1.21863	0.410368	2.96961	0.00298182	0.048817	Up Regulated in ART
ENSG00000112357	PEX7	protein_coding	88.3245	0.749482	0.206621	3.62732	0.000286375	0.0101209	Up Regulated in ART
ENSG00000024862	CCDC28A	protein_coding	498.123	0.477512	0.146246	3.26512	0.00109417	0.0245576	Up Regulated in ART
ENSG00000164442	CITED2	protein_coding	1645.08	-1.19348	0.220756	-5.40633	6.43306e-08	2.17992e-05	Down Regulated in ART
ENSG00000169976	SF3B5	protein_coding	1700.3	0.660861	0.20761	3.18319	0.00145662	0.0299527	Up Regulated in ART
ENSG00000146433	TMEM181	protein_coding	970.95	-0.995021	0.267642	-3.71774	0.000201017	0.00794959	Down Regulated in ART
ENSG00000146425	DYNLT1	protein_coding	1491.03	0.699156	0.203143	3.44169	0.000578088	0.0159338	Up Regulated in ART
ENSG00000092820	EZR	protein_coding	5275.64	0.692983	0.208976	3.31608	0.000912881	0.0220649	Up Regulated in ART
ENSG00000146457	WTAP	protein_coding	2761.57	0.671551	0.163698	4.10238	4.08921e-05	0.00255126	Up Regulated in ART
ENSG00000120437	ACAT2	protein_coding	402.634	0.584547	0.147133	3.9729	7.10017e-05	0.00377719	Up Regulated in ART
ENSG00000008018	PSMB1	protein_coding	2857.8	0.751239	0.131681	5.70501	1.16339e-08	6.09266e-06	Up Regulated in ART
ENSG00000071994	PDCD2	protein_coding	1374.49	0.444379	0.11577	3.83846	0.000123811	0.00550051	Up Regulated in ART
ENSG00000164818	DNAAF5	protein_coding	224.819	-0.653746	0.18464	-3.54065	0.00039915	0.0124173	Down Regulated in ART
ENSG00000239857	GET4	protein_coding	44.1035	-1.17134	0.358905	-3.26366	0.00109985	0.0246531	Down Regulated in ART
ENSG00000178381	ZFAND2A	protein_coding	672.293	0.958476	0.242855	3.94671	7.92333e-05	0.00403288	Up Regulated in ART
ENSG00000182095	TNRC18	protein_coding	1283.25	-0.982655	0.284062	-3.4593	0.00054158	0.0152685	Down Regulated in ART
ENSG00000122543	OCM	protein_coding	20.02	1.61466	0.468769	3.44446	0.0005722	0.0158298	Up Regulated in ART
ENSG00000008256	CYTH3	protein_coding	282.147	-1.05072	0.234151	-4.48737	7.21083e-06	0.000676425	Down Regulated in ART
ENSG00000189043	NDUFA4	protein_coding	2629.88	0.904818	0.147977	6.11457	9.68179e-10	9.29559e-07	Up Regulated in ART
ENSG00000196683	TOMM7	protein_coding	5835.83	1.14587	0.224408	5.1062	3.28693e-07	7.28267e-05	Up Regulated in ART
ENSG00000156928	MALSU1	protein_coding	173.277	0.634562	0.182293	3.481	0.000499553	0.0144611	Up Regulated in ART
ENSG00000169193	CCDC126	protein_coding	135.042	-0.8816	0.249253	-3.53697	0.000404747	0.0124685	Down Regulated in ART
ENSG00000086300	SNX10	protein_coding	1421.77	-0.810349	0.261834	-3.0949	0.00196881	0.0367329	Down Regulated in ART
ENSG00000180233	ZNRF2	protein_coding	235.016	-0.761001	0.241228	-3.15469	0.00160669	0.0319741	Down Regulated in ART
ENSG00000170852	KBTBD2	protein_coding	1464.71	0.608345	0.188623	3.2252	0.00125886	0.0273656	Up Regulated in ART
ENSG00000164610	RP9	protein_coding	307.645	0.592478	0.160164	3.69919	0.000216287	0.00838089	Up Regulated in ART
ENSG00000155849	ELMO1	protein_coding	1349.15	0.612593	0.168824	3.62859	0.000284971	0.0100919	Up Regulated in ART
ENSG00000106603	COA1	protein_coding	741.278	0.504906	0.121653	4.15038	3.31925e-05	0.00215651	Up Regulated in ART
ENSG00000122515	ZMIZ2	protein_coding	2180.99	-0.583906	0.192931	-3.0265	0.00247401	0.0429535	Down Regulated in ART
ENSG00000196262	PPIA	protein_coding	16554.1	0.686856	0.122133	5.62384	1.86758e-08	7.87209e-06	Up Regulated in ART
ENSG00000105968	H2AFV	protein_coding	2034.26	0.400013	0.125195	3.19512	0.00139774	0.0294404	Up Regulated in ART
ENSG00000132432	SEC61G	protein_coding	754.531	0.794565	0.162428	4.89179	9.99249e-07	0.00016633	Up Regulated in ART
ENSG00000239789	MRPS17	protein_coding	79.5435	0.64728	0.192798	3.35729	0.000787094	0.0199744	Up Regulated in ART
ENSG00000198039	ZNF273	protein_coding	136.309	1.09365	0.312444	3.50032	0.000464701	0.0138704	Up Regulated in ART
ENSG00000241258	CRCP	protein_coding	616.193	0.577822	0.151997	3.80153	0.000143807	0.00616823	Up Regulated in ART
ENSG00000176410	DNAJC30	protein_coding	114.052	0.98779	0.266874	3.70134	0.000214463	0.00834889	Up Regulated in ART
ENSG00000075303	SLC25A40	protein_coding	484.938	-0.875001	0.262177	-3.33745	0.000845516	0.0209946	Down Regulated in ART
ENSG00000127989	MTERF1	protein_coding	232.873	0.431571	0.142457	3.02948	0.00244975	0.0426781	Up Regulated in ART
ENSG00000001629	ANKIB1	protein_coding	1030.56	-0.443296	0.142444	-3.11206	0.00185784	0.0353603	Down Regulated in ART
ENSG00000157259	GATAD1	protein_coding	827.559	-0.412737	0.116283	-3.54942	0.000386088	0.0121096	Down Regulated in ART
ENSG00000234545	FAM133B	protein_coding	399.698	0.529309	0.163281	3.24172	0.00118812	0.0262572	Up Regulated in ART
ENSG00000196367	TRRAP	protein_coding	2039.68	-0.479743	0.136852	-3.50557	0.00045563	0.0136705	Down Regulated in ART
ENSG00000130429	ARPC1B	protein_coding	358.59	-1.25313	0.175933	-7.12275	1.05795e-12	3.65671e-09	Down Regulated in ART
ENSG00000166526	ZNF3	protein_coding	574.891	0.443882	0.117678	3.772	0.000161942	0.00679084	Up Regulated in ART
ENSG00000166508	MCM7	protein_coding	2151.49	0.432509	0.118443	3.65163	0.000260584	0.00948089	Up Regulated in ART
ENSG00000077454	LRCH4	protein_coding	1093.84	-0.792701	0.230176	-3.4439	0.000573398	0.0158298	Down Regulated in ART
ENSG00000105819	PMPCB	protein_coding	1602.91	0.401217	0.101184	3.96521	7.33301e-05	0.00386369	Up Regulated in ART
ENSG00000161057	PSMC2	protein_coding	1270.22	0.551127	0.124973	4.40998	1.03379e-05	0.000884454	Up Regulated in ART
ENSG00000105856	HBP1	protein_coding	2017.82	0.983191	0.245039	4.01239	6.01081e-05	0.00335093	Up Regulated in ART
ENSG00000105865	DUS4L	protein_coding	125.378	0.575509	0.173648	3.31423	0.000918975	0.0221812	Up Regulated in ART
ENSG00000164603	BMT2	protein_coding	437.476	-0.673591	0.193895	-3.47399	0.000512773	0.014745	Down Regulated in ART
ENSG00000128534	LSM8	protein_coding	1163.94	0.464025	0.131983	3.51579	0.000438449	0.0132702	Up Regulated in ART
ENSG00000071243	ING3	protein_coding	624.019	0.478443	0.142061	3.36787	0.000757514	0.0194522	Up Regulated in ART
ENSG00000179562	GCC1	protein_coding	626.27	0.690591	0.223786	3.08595	0.00202904	0.0374235	Up Regulated in ART
ENSG00000128607	KLHDC10	protein_coding	782.858	-0.413965	0.13625	-3.03829	0.00237928	0.0419546	Down Regulated in ART
ENSG00000106484	MEST	protein_coding	139.183	1.08013	0.34817	3.10231	0.0019202	0.0361293	Up Regulated in ART
ENSG00000106028	SSBP1	protein_coding	1278.67	0.408363	0.0955199	4.27516	1.91003e-05	0.00142897	Up Regulated in ART
ENSG00000170379	TCAF2	protein_coding	290.479	0.696144	0.188556	3.69198	0.000222518	0.00852471	Up Regulated in ART
ENSG00000197558	SSPO	protein_coding	75.9706	-1.32456	0.41907	-3.16072	0.0015738	0.0315176	Down Regulated in ART
ENSG00000179144	GIMAP7	protein_coding	1584.21	1.18324	0.304215	3.88948	0.000100457	0.00480916	Up Regulated in ART
ENSG00000205542	TMSB4X	protein_coding	89089.5	0.610723	0.122532	4.98421	6.22155e-07	0.000114384	Up Regulated in ART
ENSG00000123131	PRDX4	protein_coding	362.936	0.541654	0.180374	3.00295	0.00267379	0.045276	Up Regulated in ART
ENSG00000171659	GPR34	protein_coding	55.4028	-2.12614	0.67964	-3.12833	0.00175801	0.0341753	Down Regulated in ART
ENSG00000126756	UXT	protein_coding	1930.15	0.691544	0.207413	3.33414	0.000855631	0.021169	Up Regulated in ART
ENSG00000102096	PIM2	protein_coding	2535.77	0.832901	0.21022	3.96204	7.43118e-05	0.00389169	Up Regulated in ART
ENSG00000068400	GRIPAP1	protein_coding	1909.95	-0.396072	0.116942	-3.38692	0.000706824	0.0186003	Down Regulated in ART
ENSG00000189369	GSPT2	protein_coding	185.461	0.601959	0.201577	2.98624	0.00282429	0.0469321	Up Regulated in ART
ENSG00000158526	TSR2	protein_coding	1064.25	0.513023	0.130221	3.93964	8.16057e-05	0.00412371	Up Regulated in ART
ENSG00000204272	NBDY	protein_coding	557.253	0.437162	0.141241	3.09515	0.00196712	0.0367329	Up Regulated in ART
ENSG00000198205	ZXDA	protein_coding	135.356	0.878399	0.295808	2.96949	0.00298292	0.048817	Up Regulated in ART
ENSG00000089289	IGBP1	protein_coding	2605.53	0.517955	0.14314	3.61851	0.000296307	0.0102884	Up Regulated in ART
ENSG00000184634	MED12	protein_coding	1070.2	-0.53407	0.150127	-3.55744	0.00037448	0.0118966	Down Regulated in ART
ENSG00000198034	RPS4X	protein_coding	55044.2	0.746688	0.177289	4.2117	2.53456e-05	0.00176622	Up Regulated in ART
ENSG00000131174	COX7B	protein_coding	1650.61	0.825145	0.160178	5.15142	2.5852e-07	5.95698e-05	Up Regulated in ART
ENSG00000078589	P2RY10	protein_coding	989.961	0.936494	0.243738	3.84221	0.000121932	0.00550051	Up Regulated in ART
ENSG00000188917	TRMT2B	protein_coding	927.839	0.41832	0.139026	3.00894	0.00262161	0.0448501	Up Regulated in ART
ENSG00000198960	ARMCX6	protein_coding	351.651	0.585327	0.145599	4.02012	5.81682e-05	0.00330678	Up Regulated in ART
ENSG00000147224	PRPS1	protein_coding	1192.16	0.497973	0.122682	4.05904	4.92749e-05	0.00290638	Up Regulated in ART
ENSG00000198918	RPL39	protein_coding	21958.7	1.98363	0.237109	8.36592	5.96498e-17	5.15434e-13	Up Regulated in ART
ENSG00000125356	NDUFA1	protein_coding	1897.3	1.03827	0.186063	5.58022	2.4022e-08	9.82939e-06	Up Regulated in ART
ENSG00000125355	TMEM255A	protein_coding	46.5285	-2.50178	0.742583	-3.36903	0.000754333	0.0194283	Down Regulated in ART
ENSG00000101966	XIAP	protein_coding	751.173	-0.69452	0.174155	-3.98795	6.66471e-05	0.00364492	Down Regulated in ART
ENSG00000085185	BCORL1	protein_coding	234.903	-0.764271	0.182456	-4.1888	2.80434e-05	0.00191061	Down Regulated in ART
ENSG00000134602	STK26	protein_coding	1226.01	-0.736811	0.218627	-3.37017	0.000751224	0.0193771	Down Regulated in ART
ENSG00000102081	FMR1	protein_coding	1047.02	-0.60223	0.188113	-3.20142	0.00136751	0.0291052	Down Regulated in ART
ENSG00000147400	CETN2	protein_coding	378	0.606277	0.176025	3.44426	0.000572623	0.0158298	Up Regulated in ART
ENSG00000101986	ABCD1	protein_coding	387.09	-0.82527	0.273677	-3.01549	0.00256566	0.0440753	Down Regulated in ART
ENSG00000196924	FLNA	protein_coding	33479.7	-0.801095	0.230263	-3.47905	0.000503194	0.0145179	Down Regulated in ART
ENSG00000147403	RPL10	protein_coding	83643	0.6703	0.183845	3.64601	0.000266342	0.0096393	Up Regulated in ART
ENSG00000130827	PLXNA3	protein_coding	753.471	-0.739889	0.235638	-3.13994	0.00168982	0.0331858	Down Regulated in ART
ENSG00000165775	FUNDC2	protein_coding	1405.03	0.569671	0.109753	5.19047	2.09766e-07	4.96599e-05	Up Regulated in ART
ENSG00000155961	RAB39B	protein_coding	192.334	0.689696	0.221985	3.10695	0.00189026	0.0358106	Up Regulated in ART
ENSG00000173281	PPP1R3B	protein_coding	271.681	0.875749	0.229464	3.81651	0.000135354	0.00587738	Up Regulated in ART
ENSG00000104660	LEPROTL1	protein_coding	2176.38	0.744088	0.212066	3.50875	0.000450211	0.0135314	Up Regulated in ART
ENSG00000104671	DCTN6	protein_coding	210.128	0.657678	0.215788	3.0478	0.00230521	0.0408219	Up Regulated in ART
ENSG00000198042	MAK16	protein_coding	323.054	0.786446	0.162366	4.84366	1.27469e-06	0.000192776	Up Regulated in ART
ENSG00000104221	BRF2	protein_coding	241.38	1.06903	0.273325	3.91123	9.1829e-05	0.00448302	Up Regulated in ART
ENSG00000168172	HOOK3	protein_coding	1108.19	-0.801845	0.210191	-3.81485	0.000136266	0.00590215	Down Regulated in ART
ENSG00000008988	RPS20	protein_coding	33440.7	0.761215	0.211787	3.59424	0.000325336	0.0108963	Up Regulated in ART
ENSG00000147604	RPL7	protein_coding	45293.6	0.785353	0.177665	4.42041	9.85151e-06	0.000859868	Up Regulated in ART
ENSG00000164751	PEX2	protein_coding	776.437	0.619216	0.15756	3.93003	8.49336e-05	0.00426693	Up Regulated in ART
ENSG00000176731	C8orf59	protein_coding	828.628	0.633697	0.12793	4.95346	7.29071e-07	0.000125438	Up Regulated in ART
ENSG00000205133	TRIQK	protein_coding	260.66	-1.05166	0.352498	-2.98346	0.0028501	0.0472248	Down Regulated in ART
ENSG00000156467	UQCRB	protein_coding	5329.43	0.808447	0.169491	4.76984	1.84372e-06	0.000245102	Up Regulated in ART
ENSG00000156482	RPL30	protein_coding	45158.8	1.11468	0.202773	5.49719	3.859e-08	1.44981e-05	Up Regulated in ART
ENSG00000164919	COX6C	protein_coding	1960.77	1.0654	0.145943	7.30011	2.87527e-13	1.24226e-09	Up Regulated in ART
ENSG00000104408	EIF3E	protein_coding	11836.4	0.49307	0.159543	3.09051	0.00199812	0.0371019	Up Regulated in ART
ENSG00000147677	EIF3H	protein_coding	8004.31	0.439328	0.119516	3.6759	0.000237016	0.00888526	Up Regulated in ART
ENSG00000183665	TRMT12	protein_coding	241.944	0.891082	0.187016	4.76475	1.89091e-06	0.00024691	Up Regulated in ART
ENSG00000147687	TATDN1	protein_coding	420.505	0.516178	0.161778	3.19065	0.00141954	0.0297253	Up Regulated in ART
ENSG00000132294	EFR3A	protein_coding	1267.04	-0.6865	0.222351	-3.08747	0.00201871	0.0372729	Down Regulated in ART
ENSG00000022567	SLC45A4	protein_coding	235.311	-0.771852	0.198905	-3.8805	0.000104243	0.00492	Down Regulated in ART
ENSG00000180900	SCRIB	protein_coding	568.324	-1.12658	0.356221	-3.16259	0.00156373	0.0314238	Down Regulated in ART
ENSG00000178209	PLEC	protein_coding	5111.61	-1.16316	0.300112	-3.87576	0.000106294	0.00497825	Down Regulated in ART
ENSG00000179832	MROH1	protein_coding	768.071	-0.74438	0.249593	-2.98238	0.00286018	0.0473464	Down Regulated in ART
ENSG00000071894	CPSF1	protein_coding	2110.95	-0.980722	0.260372	-3.76661	0.000165476	0.00690763	Down Regulated in ART
ENSG00000170631	ZNF16	protein_coding	153.27	1.07867	0.184943	5.83246	5.46174e-09	3.25482e-06	Up Regulated in ART
ENSG00000182307	C8orf33	protein_coding	756.595	0.452838	0.118592	3.81847	0.000134284	0.00586033	Up Regulated in ART
ENSG00000205808	PLPP6	protein_coding	111.093	0.999233	0.256089	3.9019	9.5441e-05	0.0046202	Up Regulated in ART
ENSG00000120158	RCL1	protein_coding	224.961	0.881692	0.219608	4.01484	5.94873e-05	0.00332705	Up Regulated in ART
ENSG00000137040	RANBP6	protein_coding	1019.75	0.684954	0.205891	3.32678	0.000878556	0.0214755	Up Regulated in ART
ENSG00000137038	DMAC1	protein_coding	344.871	0.734952	0.163662	4.49067	7.09994e-06	0.000670499	Up Regulated in ART
ENSG00000175893	ZDHHC21	protein_coding	332.038	-0.898663	0.24316	-3.69577	0.00021922	0.00845662	Down Regulated in ART
ENSG00000155876	RRAGA	protein_coding	617.902	0.54571	0.136967	3.98423	6.76988e-05	0.00367717	Up Regulated in ART
ENSG00000137154	RPS6	protein_coding	76503.1	0.848695	0.221093	3.83863	0.000123724	0.00550051	Up Regulated in ART
ENSG00000171843	MLLT3	protein_coding	723.805	1.17734	0.21697	5.42629	5.75378e-08	2.05491e-05	Up Regulated in ART
ENSG00000198642	KLHL9	protein_coding	701.984	0.52712	0.146035	3.60953	0.000306749	0.0104967	Up Regulated in ART
ENSG00000235453	SMIM27	protein_coding	135.214	0.903939	0.273203	3.30867	0.000937405	0.0224691	Up Regulated in ART
ENSG00000107262	BAG1	protein_coding	1508.61	0.392345	0.126984	3.08971	0.00200349	0.0371262	Up Regulated in ART
ENSG00000165006	UBAP1	protein_coding	1425.75	0.4892	0.145919	3.35255	0.0008007	0.0202306	Up Regulated in ART
ENSG00000147905	ZCCHC7	protein_coding	705.295	0.535811	0.162539	3.2965	0.000978979	0.0229874	Up Regulated in ART
ENSG00000168795	ZBTB5	protein_coding	438.441	1.00342	0.226106	4.43785	9.0864e-06	0.000813633	Up Regulated in ART
ENSG00000165118	C9orf64	protein_coding	124.68	-1.27425	0.399782	-3.18738	0.0014357	0.0298218	Down Regulated in ART
ENSG00000169071	ROR2	protein_coding	3.45179	4.1725	1.32743	3.14329	0.0016706	0.0329957	Up Regulated in ART
ENSG00000185963	BICD2	protein_coding	1705.92	-0.686249	0.161517	-4.24877	2.14947e-05	0.00156739	Down Regulated in ART
ENSG00000048828	FAM120A	protein_coding	4168.53	-0.547375	0.118762	-4.609	4.04605e-06	0.000439773	Down Regulated in ART
ENSG00000197816	CCDC180	protein_coding	46.8098	-1.70055	0.45292	-3.75463	0.000173596	0.00717444	Down Regulated in ART
ENSG00000136932	TRMO	protein_coding	426.332	0.835785	0.175943	4.75033	2.03088e-06	0.000259983	Up Regulated in ART
ENSG00000136938	ANP32B	protein_coding	4205.69	0.470592	0.121982	3.85787	0.000114378	0.00525713	Up Regulated in ART
ENSG00000119523	ALG2	protein_coding	348.033	0.652352	0.185423	3.51818	0.000434525	0.0131745	Up Regulated in ART
ENSG00000136897	MRPL50	protein_coding	242.406	0.549617	0.170344	3.22651	0.00125308	0.0273086	Up Regulated in ART
ENSG00000136810	TXN	protein_coding	1157.73	0.55886	0.149361	3.74169	0.00018279	0.00744855	Up Regulated in ART
ENSG00000148229	POLE3	protein_coding	1862.49	0.423178	0.109336	3.87044	0.000108638	0.00503346	Up Regulated in ART
ENSG00000138835	RGS3	protein_coding	891.418	-0.965262	0.283175	-3.40871	0.000652716	0.0175299	Down Regulated in ART
ENSG00000136888	ATP6V1G1	protein_coding	3256.66	0.437803	0.126175	3.46982	0.000520803	0.0149262	Up Regulated in ART
ENSG00000136930	PSMB7	protein_coding	1692.26	0.512947	0.143774	3.56774	0.000360067	0.0116968	Up Regulated in ART
ENSG00000136942	RPL35	protein_coding	15545.4	0.865359	0.282036	3.06826	0.0021531	0.0390451	Up Regulated in ART
ENSG00000197958	RPL12	protein_coding	31600.2	1.12048	0.207687	5.39505	6.85059e-08	2.27677e-05	Up Regulated in ART
ENSG00000106991	ENG	protein_coding	578.689	-0.86009	0.259603	-3.31309	0.000922703	0.0222401	Down Regulated in ART
ENSG00000257524	AL157935.2	protein_coding	76.441	-1.29511	0.325032	-3.98457	6.76019e-05	0.00367717	Down Regulated in ART
ENSG00000167110	GOLGA2	protein_coding	793.689	-0.458802	0.101076	-4.53916	5.64784e-06	0.000567977	Down Regulated in ART
ENSG00000160445	ZER1	protein_coding	1045.61	-0.614212	0.149789	-4.1005	4.12259e-05	0.00256283	Down Regulated in ART
ENSG00000095319	NUP188	protein_coding	1102.95	-0.352353	0.100986	-3.48914	0.000484581	0.0141701	Down Regulated in ART
ENSG00000188483	IER5L	protein_coding	67.2987	-2.44453	0.467423	-5.22981	1.69684e-07	4.2609e-05	Down Regulated in ART
ENSG00000107164	FUBP3	protein_coding	868.179	-0.530558	0.120303	-4.41019	1.0328e-05	0.000884454	Down Regulated in ART
ENSG00000130723	PRRC2B	protein_coding	4132.57	-0.563577	0.14124	-3.9902	6.60187e-05	0.00363355	Down Regulated in ART
ENSG00000160563	MED27	protein_coding	372.442	0.566082	0.146227	3.87126	0.000108275	0.00503015	Up Regulated in ART
ENSG00000125482	TTF1	protein_coding	425.276	0.538622	0.140049	3.84597	0.000120079	0.00546105	Up Regulated in ART
ENSG00000148303	RPL7A	protein_coding	49954	0.86353	0.17685	4.88283	1.04576e-06	0.000170498	Up Regulated in ART
ENSG00000148290	SURF1	protein_coding	1226.42	0.56873	0.168308	3.37911	0.000727216	0.0188989	Up Regulated in ART
ENSG00000169925	BRD3	protein_coding	703.578	-0.428905	0.135615	-3.16267	0.00156328	0.0314238	Down Regulated in ART
ENSG00000148411	NACC2	protein_coding	823.022	-0.749148	0.243724	-3.07375	0.00211385	0.0384995	Down Regulated in ART
ENSG00000238227	TMEM250	protein_coding	539.947	-1.01139	0.254185	-3.97894	6.9224e-05	0.00371531	Down Regulated in ART
ENSG00000148396	SEC16A	protein_coding	2085.67	-0.504365	0.113386	-4.44822	8.65849e-06	0.000779646	Down Regulated in ART
ENSG00000148400	NOTCH1	protein_coding	1285.31	-1.2284	0.292687	-4.19699	2.70487e-05	0.00186982	Down Regulated in ART
ENSG00000232434	AJM1	protein_coding	74.5873	-1.51057	0.446668	-3.38187	0.000719934	0.0187944	Down Regulated in ART
ENSG00000214402	LCNL1	protein_coding	26.8074	-1.44084	0.470519	-3.06224	0.00219687	0.039425	Down Regulated in ART
ENSG00000169583	CLIC3	protein_coding	120.936	-1.91136	0.511989	-3.73321	0.000189057	0.00763386	Down Regulated in ART
ENSG00000188229	TUBB4B	protein_coding	3156.77	-1.04719	0.288931	-3.62435	0.000289693	0.0101965	Down Regulated in ART
ENSG00000177951	BET1L	protein_coding	1673.48	0.367144	0.103927	3.53273	0.000411297	0.0126253	Up Regulated in ART
ENSG00000021762	OSBPL5	protein_coding	914.41	-1.34187	0.333741	-4.02068	5.80315e-05	0.00330678	Down Regulated in ART
ENSG00000244734	HBB	protein_coding	25441.1	4.91523	1.28928	3.81237	0.000137642	0.00594684	Up Regulated in ART
ENSG00000223609	HBD	protein_coding	67.7529	3.91531	1.12051	3.49421	0.000475471	0.0140055	Up Regulated in ART
ENSG00000132286	TIMM10B	protein_coding	566.021	0.816969	0.208043	3.92691	8.60429e-05	0.00429767	Up Regulated in ART
ENSG00000132275	RRP8	protein_coding	411.023	0.471755	0.131746	3.5808	0.000342539	0.0112329	Up Regulated in ART
ENSG00000158042	MRPL17	protein_coding	255.932	0.690071	0.174558	3.95324	7.71004e-05	0.00397746	Up Regulated in ART
ENSG00000175390	EIF3F	protein_coding	6974.06	0.473789	0.129902	3.64728	0.000265028	0.0096223	Up Regulated in ART
ENSG00000166441	RPL27A	protein_coding	34617.8	0.788435	0.214628	3.6735	0.000239253	0.00889199	Up Regulated in ART
ENSG00000197601	FAR1	protein_coding	1344.9	-1.09598	0.253932	-4.31605	1.58847e-05	0.00122605	Down Regulated in ART
ENSG00000110700	RPS13	protein_coding	22627.6	0.919877	0.176085	5.22405	1.75052e-07	4.2609e-05	Up Regulated in ART
ENSG00000151116	UEVLD	protein_coding	289.428	-0.677783	0.218473	-3.10236	0.00191984	0.0361293	Down Regulated in ART
ENSG00000148950	IMMP1L	protein_coding	102.399	0.721911	0.238749	3.02373	0.00249682	0.0432365	Up Regulated in ART
ENSG00000110422	HIPK3	protein_coding	3194.94	-0.722822	0.226591	-3.18998	0.00142282	0.0297253	Down Regulated in ART
ENSG00000085063	CD59	protein_coding	513.012	0.641738	0.204426	3.13922	0.00169398	0.0331921	Up Regulated in ART
ENSG00000149089	APIP	protein_coding	300.081	-0.640404	0.208009	-3.07873	0.00207882	0.0380269	Down Regulated in ART
ENSG00000121671	CRY2	protein_coding	777.406	0.644311	0.196343	3.28156	0.00103235	0.0236934	Up Regulated in ART
ENSG00000165912	PACSIN3	protein_coding	3.92048	-4.51268	1.31832	-3.42306	0.0006192	0.0168786	Down Regulated in ART
ENSG00000213619	NDUFS3	protein_coding	996.861	0.475365	0.132738	3.58123	0.000341984	0.0112329	Up Regulated in ART
ENSG00000123444	KBTBD4	protein_coding	707.437	0.852626	0.229894	3.70877	0.000208267	0.00818016	Up Regulated in ART
ENSG00000211450	SELENOH	protein_coding	333.665	-1.10334	0.3461	-3.18793	0.00143295	0.0298007	Down Regulated in ART
ENSG00000166902	MRPL16	protein_coding	654.081	0.428319	0.118364	3.61867	0.000296119	0.0102884	Up Regulated in ART
ENSG00000149483	TMEM138	protein_coding	655.066	0.356807	0.0860608	4.14599	3.38347e-05	0.00218183	Up Regulated in ART
ENSG00000134780	DAGLA	protein_coding	102.895	-1.02725	0.325648	-3.15449	0.00160777	0.0319741	Down Regulated in ART
ENSG00000134825	TMEM258	protein_coding	1106.91	0.841415	0.166199	5.0627	4.13359e-07	8.50437e-05	Up Regulated in ART
ENSG00000168496	FEN1	protein_coding	236.617	0.850694	0.246186	3.4555	0.000549275	0.015385	Up Regulated in ART
ENSG00000167996	FTH1	protein_coding	50906.8	0.63327	0.211597	2.99281	0.00276423	0.0462454	Up Regulated in ART
ENSG00000124942	AHNAK	protein_coding	52671.7	-0.643212	0.211827	-3.03649	0.00239348	0.0419573	Down Regulated in ART
ENSG00000185670	ZBTB3	protein_coding	63.21	1.10657	0.257064	4.30464	1.67259e-05	0.00127974	Up Regulated in ART
ENSG00000168002	POLR2G	protein_coding	1652.77	0.293081	0.0976016	3.00283	0.00267485	0.045276	Up Regulated in ART
ENSG00000185475	TMEM179B	protein_coding	654.51	0.714258	0.155746	4.58603	4.51758e-06	0.000473618	Up Regulated in ART
ENSG00000072518	MARK2	protein_coding	1748.09	-0.491696	0.128047	-3.83996	0.000123056	0.00550051	Down Regulated in ART
ENSG00000149792	MRPL49	protein_coding	989.974	0.494004	0.108131	4.56859	4.91012e-06	0.000505099	Up Regulated in ART
ENSG00000014216	CAPN1	protein_coding	2930.89	-0.461007	0.151747	-3.038	0.00238152	0.0419546	Down Regulated in ART
ENSG00000197136	PCNX3	protein_coding	1284.37	-0.877597	0.246972	-3.55342	0.000380252	0.0120357	Down Regulated in ART
ENSG00000175376	EIF1AD	protein_coding	731.744	0.810728	0.24079	3.36695	0.000760042	0.0194882	Up Regulated in ART
ENSG00000239306	RBM14	protein_coding	739.127	-0.667304	0.172268	-3.87364	0.00010722	0.00500807	Down Regulated in ART
ENSG00000173933	RBM4	protein_coding	541.597	0.586051	0.168826	3.47132	0.000517904	0.0148678	Up Regulated in ART
ENSG00000197345	MRPL21	protein_coding	445.5	0.680652	0.187938	3.62169	0.000292685	0.0102392	Up Regulated in ART
ENSG00000168040	FADD	protein_coding	206.758	0.763527	0.198301	3.85034	0.000117952	0.00539272	Up Regulated in ART
ENSG00000137522	RNF121	protein_coding	283.195	0.36803	0.120746	3.04797	0.00230391	0.0408219	Up Regulated in ART
ENSG00000110200	ANAPC15	protein_coding	866.968	0.512476	0.164475	3.11584	0.00183423	0.0351042	Up Regulated in ART
ENSG00000171631	P2RY6	protein_coding	19.4065	-1.56516	0.47875	-3.26926	0.00107829	0.0244787	Down Regulated in ART
ENSG00000110237	ARHGEF17	protein_coding	39.6452	-2.15699	0.678553	-3.17881	0.00147882	0.0302808	Down Regulated in ART
ENSG00000175536	LIPT2	protein_coding	60.728	1.11465	0.268668	4.14879	3.34235e-05	0.00216339	Up Regulated in ART
ENSG00000149273	RPS3	protein_coding	56620.4	0.843389	0.209211	4.03128	5.54741e-05	0.00318506	Up Regulated in ART
ENSG00000149262	INTS4	protein_coding	707.31	0.316403	0.106175	2.98002	0.00288229	0.0476211	Up Regulated in ART
ENSG00000137494	ANKRD42	protein_coding	179.478	-0.698466	0.150109	-4.65306	3.27042e-06	0.000368965	Down Regulated in ART
ENSG00000171202	TMEM126A	protein_coding	317.775	0.645577	0.162892	3.96322	7.39456e-05	0.00388428	Up Regulated in ART
ENSG00000182919	C11orf54	protein_coding	185.005	-0.818312	0.20991	-3.8984	9.68308e-05	0.00464842	Down Regulated in ART
ENSG00000020922	MRE11	protein_coding	676.076	-0.693655	0.192219	-3.60866	0.000307784	0.0104967	Down Regulated in ART
ENSG00000168876	ANKRD49	protein_coding	891.913	0.583624	0.18438	3.16533	0.00154909	0.0312021	Up Regulated in ART
ENSG00000150316	CWC15	protein_coding	1161.43	0.780586	0.161914	4.82098	1.42855e-06	0.000205736	Up Regulated in ART
ENSG00000149231	CCDC82	protein_coding	825.643	-0.715204	0.222738	-3.21096	0.0013229	0.0282951	Down Regulated in ART
ENSG00000255221	CARD17	protein_coding	27.5405	1.51818	0.510728	2.97259	0.00295301	0.0484652	Up Regulated in ART
ENSG00000137720	C11orf1	protein_coding	207.446	1.04288	0.221266	4.71325	2.43801e-06	0.000294642	Up Regulated in ART
ENSG00000150787	PTS	protein_coding	226.747	0.694102	0.232274	2.9883	0.00280537	0.0466637	Up Regulated in ART
ENSG00000109917	ZPR1	protein_coding	1212.27	0.442453	0.143947	3.07372	0.00211411	0.0384995	Up Regulated in ART
ENSG00000149573	MPZL2	protein_coding	116.064	-1.16613	0.366136	-3.18498	0.00144766	0.0299065	Down Regulated in ART
ENSG00000186174	BCL9L	protein_coding	3581.43	-1.02559	0.240493	-4.26453	2.0032e-05	0.00148581	Down Regulated in ART
ENSG00000118181	RPS25	protein_coding	26096.1	0.951552	0.19214	4.95239	7.33088e-07	0.000125438	Up Regulated in ART
ENSG00000196655	TRAPPC4	protein_coding	674.818	0.65062	0.149324	4.35711	1.31792e-05	0.00105936	Up Regulated in ART
ENSG00000188486	H2AFX	protein_coding	358.93	-1.75333	0.348218	-5.03514	4.7749e-07	9.42704e-05	Down Regulated in ART
ENSG00000110395	CBL	protein_coding	2587.47	-0.546052	0.164323	-3.32304	0.000890414	0.0216734	Down Regulated in ART
ENSG00000137709	POU2F3	protein_coding	2.17785	-4.33239	1.32599	-3.26728	0.00108587	0.0245116	Down Regulated in ART
ENSG00000154114	TBCEL	protein_coding	248.795	-0.593309	0.194326	-3.05316	0.00226448	0.0403827	Down Regulated in ART
ENSG00000134955	SLC37A2	protein_coding	851.309	-0.941154	0.280812	-3.35155	0.000803619	0.0202451	Down Regulated in ART
ENSG00000107929	LARP4B	protein_coding	1151.52	-0.609966	0.151152	-4.03544	5.44997e-05	0.00317126	Down Regulated in ART
ENSG00000107937	GTPBP4	protein_coding	834.317	0.591978	0.160701	3.68372	0.000229852	0.00869212	Up Regulated in ART
ENSG00000151657	KIN	protein_coding	323.438	0.46334	0.139184	3.32899	0.000871628	0.021397	Up Regulated in ART
ENSG00000152464	RPP38	protein_coding	260.457	0.99883	0.200935	4.97091	6.66381e-07	0.000121225	Up Regulated in ART
ENSG00000168283	BMI1	protein_coding	626.763	-0.73702	0.243403	-3.02799	0.00246189	0.0428044	Down Regulated in ART
ENSG00000265354	TIMM23	protein_coding	478.775	0.788761	0.158995	4.96091	7.0164e-07	0.000125008	Up Regulated in ART
ENSG00000177613	CSTF2T	protein_coding	746.809	1.09952	0.172924	6.35841	2.03854e-10	2.71001e-07	Up Regulated in ART
ENSG00000151151	IPMK	protein_coding	414.747	-0.913186	0.287359	-3.17786	0.00148368	0.030309	Down Regulated in ART
ENSG00000148572	NRBF2	protein_coding	460.778	0.69078	0.226716	3.0469	0.00231214	0.0408573	Up Regulated in ART
ENSG00000122882	ECD	protein_coding	606.75	0.609729	0.152892	3.98796	6.66445e-05	0.00364492	Up Regulated in ART
ENSG00000165637	VDAC2	protein_coding	1547.74	0.537974	0.13652	3.94062	8.12703e-05	0.00411881	Up Regulated in ART
ENSG00000198682	PAPSS2	protein_coding	163.945	-1.07382	0.353522	-3.03748	0.00238566	0.0419573	Down Regulated in ART
ENSG00000107864	CPEB3	protein_coding	173.661	-0.532205	0.177106	-3.00501	0.00265569	0.0452173	Down Regulated in ART
ENSG00000155252	PI4K2A	protein_coding	527.874	1.08323	0.308234	3.51431	0.000440904	0.0133212	Up Regulated in ART
ENSG00000155287	SLC25A28	protein_coding	1577.08	0.452582	0.12442	3.63753	0.000275267	0.00989016	Up Regulated in ART
ENSG00000095485	CWF19L1	protein_coding	747.362	0.492909	0.134678	3.65991	0.000252305	0.00923799	Up Regulated in ART
ENSG00000107815	TWNK	protein_coding	208.393	0.711422	0.236855	3.00362	0.00266787	0.045276	Up Regulated in ART
ENSG00000173915	ATP5MD	protein_coding	924.809	0.931741	0.159141	5.85483	4.77506e-09	2.94723e-06	Up Regulated in ART
ENSG00000119950	MXI1	protein_coding	963.408	0.748303	0.210177	3.56036	0.000370353	0.0118527	Up Regulated in ART
ENSG00000165669	FAM204A	protein_coding	982.725	0.340295	0.105632	3.22153	0.0012751	0.0275453	Up Regulated in ART
ENSG00000148908	RGS10	protein_coding	2098.28	0.575262	0.182337	3.15495	0.00160528	0.0319741	Up Regulated in ART
ENSG00000175029	CTBP2	protein_coding	1025.61	-0.784944	0.212163	-3.69972	0.000215841	0.00838089	Down Regulated in ART
ENSG00000171792	RHNO1	protein_coding	549.248	0.577511	0.137924	4.18717	2.82457e-05	0.00191428	Up Regulated in ART
ENSG00000126749	EMG1	protein_coding	747.556	0.571311	0.118756	4.81081	1.50319e-06	0.000214695	Up Regulated in ART
ENSG00000198178	CLEC4C	protein_coding	46.4373	-1.35466	0.418621	-3.236	0.00121219	0.026585	Down Regulated in ART
ENSG00000111729	CLEC4A	protein_coding	91.6462	-1.16324	0.366048	-3.17785	0.00148371	0.030309	Down Regulated in ART
ENSG00000003056	M6PR	protein_coding	3799.51	-0.39995	0.125582	-3.18478	0.00144863	0.0299065	Down Regulated in ART
ENSG00000205809	KLRC2	protein_coding	123.758	2.78766	0.932832	2.98839	0.00280455	0.0466637	Up Regulated in ART
ENSG00000111269	CREBL2	protein_coding	1378.52	-0.56872	0.173076	-3.28596	0.00101636	0.0235137	Down Regulated in ART
ENSG00000111348	ARHGDIB	protein_coding	27055.5	0.484023	0.0962093	5.03094	4.88092e-07	9.47776e-05	Up Regulated in ART
ENSG00000139163	ETNK1	protein_coding	786.204	-1.11396	0.233471	-4.77128	1.83056e-06	0.000245102	Down Regulated in ART
ENSG00000134532	SOX5	protein_coding	17.5384	1.79672	0.583305	3.08025	0.00206828	0.0379449	Up Regulated in ART
ENSG00000118307	CASC1	protein_coding	1.68423	4.20963	1.20842	3.48359	0.000494733	0.0143939	Up Regulated in ART
ENSG00000211455	STK38L	protein_coding	632.147	-0.679152	0.217488	-3.12272	0.00179189	0.0346392	Down Regulated in ART
ENSG00000139131	YARS2	protein_coding	234.851	0.567321	0.173579	3.26837	0.00108169	0.0245004	Up Regulated in ART
ENSG00000177981	ASB8	protein_coding	771.037	0.476168	0.128762	3.69806	0.000217256	0.00839959	Up Regulated in ART
ENSG00000139620	KANSL2	protein_coding	1265.13	0.899465	0.266163	3.37938	0.000726494	0.0188989	Up Regulated in ART
ENSG00000167548	KMT2D	protein_coding	3275.13	-0.926173	0.205377	-4.50962	6.49433e-06	0.000620083	Down Regulated in ART
ENSG00000167566	NCKAP5L	protein_coding	381.481	-0.997641	0.28082	-3.55259	0.000381454	0.0120517	Down Regulated in ART
ENSG00000066117	SMARCD1	protein_coding	1788.84	0.312491	0.10051	3.10906	0.00187681	0.0356428	Up Regulated in ART
ENSG00000178449	COX14	protein_coding	521.731	0.645829	0.2107	3.06516	0.00217556	0.0391255	Up Regulated in ART
ENSG00000123268	ATF1	protein_coding	542.218	-0.757271	0.191323	-3.95808	7.5554e-05	0.0039329	Down Regulated in ART
ENSG00000183283	DAZAP2	protein_coding	14850.5	0.445273	0.133816	3.3275	0.000876298	0.0214755	Up Regulated in ART
ENSG00000123349	PFDN5	protein_coding	14350.8	0.975254	0.183159	5.32462	1.01162e-07	2.96319e-05	Up Regulated in ART
ENSG00000197111	PCBP2	protein_coding	4984.06	0.369656	0.108766	3.39862	0.000677256	0.0180067	Up Regulated in ART
ENSG00000267281	ATF7	protein_coding	21.6936	-1.33373	0.397399	-3.35615	0.000790367	0.020028	Down Regulated in ART
ENSG00000135390	ATP5MC2	protein_coding	5258.38	0.750164	0.141669	5.29518	1.18898e-07	3.31419e-05	Up Regulated in ART
ENSG00000135486	HNRNPA1	protein_coding	32069.5	0.464484	0.113972	4.07543	4.59287e-05	0.00278505	Up Regulated in ART
ENSG00000135404	CD63	protein_coding	3833.28	0.602594	0.162451	3.70939	0.000207757	0.00817871	Up Regulated in ART
ENSG00000229117	RPL41	protein_coding	21590.8	1.16379	0.205441	5.66481	1.47184e-08	7.06563e-06	Up Regulated in ART
ENSG00000110944	IL23A	protein_coding	100.497	0.97017	0.291951	3.32306	0.00089035	0.0216734	Up Regulated in ART
ENSG00000176422	SPRYD4	protein_coding	237.715	0.763958	0.180308	4.23695	2.26572e-05	0.00163151	Up Regulated in ART
ENSG00000196531	NACA	protein_coding	18576.7	0.463017	0.141015	3.28345	0.00102545	0.0236606	Up Regulated in ART
ENSG00000166886	NAB2	protein_coding	375.364	1.53418	0.441121	3.47792	0.000505322	0.014555	Up Regulated in ART
ENSG00000123384	LRP1	protein_coding	6341.33	-1.04067	0.339287	-3.06722	0.00216062	0.0390584	Down Regulated in ART
ENSG00000166987	MBD6	protein_coding	1753.58	-0.563629	0.168754	-3.33994	0.000837974	0.0208673	Down Regulated in ART
ENSG00000174206	C12orf66	protein_coding	189.047	0.607557	0.180847	3.35951	0.000780801	0.0199024	Up Regulated in ART
ENSG00000155957	TMBIM4	protein_coding	307.822	-0.8457	0.263699	-3.20707	0.00134095	0.0286102	Down Regulated in ART
ENSG00000253719	ATXN7L3B	protein_coding	2430.31	0.625248	0.13848	4.51507	6.32955e-06	0.000612758	Up Regulated in ART
ENSG00000133773	CCDC59	protein_coding	1117.47	0.729963	0.242038	3.0159	0.00256214	0.0440586	Up Regulated in ART
ENSG00000102189	EEA1	protein_coding	586.406	-0.646935	0.218195	-2.96494	0.0030274	0.0493876	Down Regulated in ART
ENSG00000177889	UBE2N	protein_coding	1420.5	0.468794	0.151259	3.09929	0.00193988	0.0364006	Up Regulated in ART
ENSG00000169372	CRADD	protein_coding	141.928	0.689435	0.213235	3.23321	0.00122407	0.0267777	Up Regulated in ART
ENSG00000139343	SNRPF	protein_coding	645.884	0.773916	0.14868	5.20523	1.93754e-07	4.65064e-05	Up Regulated in ART
ENSG00000120868	APAF1	protein_coding	1428.88	-0.741373	0.237457	-3.12214	0.00179541	0.0346686	Down Regulated in ART
ENSG00000179088	C12orf42	protein_coding	58.2183	0.928224	0.302162	3.07195	0.00212668	0.0386471	Up Regulated in ART
ENSG00000110851	PRDM4	protein_coding	1444.68	0.401919	0.126212	3.18448	0.00145016	0.0299065	Up Regulated in ART
ENSG00000174600	CMKLR1	protein_coding	755.734	-1.34431	0.415144	-3.23818	0.00120295	0.0264159	Down Regulated in ART
ENSG00000136003	ISCU	protein_coding	2274.36	0.525351	0.11296	4.65077	3.30697e-06	0.000368965	Up Regulated in ART
ENSG00000135093	USP30	protein_coding	260.35	0.928719	0.204366	4.54439	5.50945e-06	0.000560084	Up Regulated in ART
ENSG00000139437	TCHP	protein_coding	665.569	-0.518484	0.127481	-4.06715	4.75907e-05	0.00282969	Down Regulated in ART
ENSG00000111249	CUX2	protein_coding	22.4368	-1.54527	0.519415	-2.97502	0.00292965	0.0481734	Down Regulated in ART
ENSG00000204842	ATXN2	protein_coding	481.001	-0.38219	0.12761	-2.99497	0.00274468	0.0460604	Down Regulated in ART
ENSG00000198270	TMEM116	protein_coding	269.508	0.572433	0.192327	2.97635	0.00291703	0.0480115	Up Regulated in ART
ENSG00000173064	HECTD4	protein_coding	1489.74	-0.568809	0.168087	-3.38402	0.000714322	0.0186761	Down Regulated in ART
ENSG00000089009	RPL6	protein_coding	42519.9	0.714586	0.170531	4.19036	2.78513e-05	0.00191061	Up Regulated in ART
ENSG00000089157	RPLP0	protein_coding	46230.9	0.7025	0.205709	3.41502	0.000637762	0.0172756	Up Regulated in ART
ENSG00000089159	PXN	protein_coding	5151.67	-0.427406	0.134137	-3.18633	0.00144091	0.0298941	Down Regulated in ART
ENSG00000111775	COX6A1	protein_coding	857.812	0.747245	0.161986	4.61302	3.96852e-06	0.000434076	Up Regulated in ART
ENSG00000170855	TRIAP1	protein_coding	571.579	0.79513	0.176128	4.5145	6.3467e-06	0.000612758	Up Regulated in ART
ENSG00000130921	C12orf65	protein_coding	327.093	0.776723	0.180851	4.29483	1.74828e-05	0.001331	Up Regulated in ART
ENSG00000184209	SNRNP35	protein_coding	346.338	0.648888	0.136944	4.73833	2.15486e-06	0.000267256	Up Regulated in ART
ENSG00000073060	SCARB1	protein_coding	262.53	-0.893703	0.221665	-4.03177	5.53576e-05	0.00318506	Down Regulated in ART
ENSG00000132341	RAN	protein_coding	4023.19	0.542176	0.116406	4.65764	3.19849e-06	0.00036366	Up Regulated in ART
ENSG00000183495	EP400	protein_coding	1481.22	-0.723596	0.12702	-5.6967	1.2215e-08	6.20883e-06	Down Regulated in ART
ENSG00000112787	FBRSL1	protein_coding	877.575	-0.826604	0.244211	-3.3848	0.000712308	0.0186517	Down Regulated in ART
ENSG00000090615	GOLGA3	protein_coding	1330.99	-0.539997	0.108987	-4.95469	7.24473e-07	0.000125438	Down Regulated in ART
ENSG00000121390	PSPC1	protein_coding	1324.92	0.564288	0.104215	5.41467	6.14027e-08	2.12232e-05	Up Regulated in ART
ENSG00000150459	SAP18	protein_coding	2345.85	0.449026	0.135265	3.3196	0.000901457	0.0218806	Up Regulated in ART
ENSG00000122026	RPL21	protein_coding	48068.4	0.95793	0.214214	4.47184	7.75482e-06	0.000716678	Up Regulated in ART
ENSG00000122034	GTF3A	protein_coding	4377.69	0.61149	0.143762	4.25349	2.10465e-05	0.00154121	Up Regulated in ART
ENSG00000132952	USPL1	protein_coding	987.609	0.588067	0.160474	3.66457	0.000247751	0.00912928	Up Regulated in ART
ENSG00000120697	ALG5	protein_coding	496.966	0.523905	0.135508	3.86622	0.000110536	0.00510773	Up Regulated in ART
ENSG00000188811	NHLRC3	protein_coding	489.289	-0.641067	0.20209	-3.17219	0.00151294	0.0306886	Down Regulated in ART
ENSG00000102780	DGKH	protein_coding	314.01	-0.869412	0.280011	-3.10492	0.00190328	0.0359481	Down Regulated in ART
ENSG00000188342	GTF2F2	protein_coding	365.607	0.51803	0.163466	3.16903	0.00152949	0.0309154	Up Regulated in ART
ENSG00000133112	TPT1	protein_coding	128948	0.590548	0.174209	3.38988	0.00069923	0.018449	Up Regulated in ART
ENSG00000204977	TRIM13	protein_coding	583.102	0.744712	0.183152	4.06608	4.78099e-05	0.00282969	Up Regulated in ART
ENSG00000136100	VPS36	protein_coding	1114.26	-0.750785	0.202832	-3.70151	0.00021432	0.00834889	Down Regulated in ART
ENSG00000083535	PIBF1	protein_coding	459.846	0.666287	0.16588	4.01668	5.90243e-05	0.00332267	Up Regulated in ART
ENSG00000188243	COMMD6	protein_coding	2238.68	0.884362	0.182629	4.8424	1.28279e-06	0.000192776	Up Regulated in ART
ENSG00000125245	GPR18	protein_coding	196.724	0.985473	0.281688	3.49846	0.000467955	0.0138955	Up Regulated in ART
ENSG00000169508	GPR183	protein_coding	1508.26	0.950012	0.288879	3.28861	0.00100683	0.0234362	Up Regulated in ART
ENSG00000175198	PCCA	protein_coding	183.594	0.588584	0.15585	3.77662	0.000158972	0.00668458	Up Regulated in ART
ENSG00000100814	CCNB1IP1	protein_coding	697.48	0.542981	0.163678	3.31736	0.000908709	0.0219948	Up Regulated in ART
ENSG00000165782	PIP4P1	protein_coding	1339.84	0.66945	0.159831	4.1885	2.8081e-05	0.00191061	Up Regulated in ART
ENSG00000092199	HNRNPC	protein_coding	11581.1	0.350366	0.0852389	4.1104	3.94977e-05	0.00248218	Up Regulated in ART
ENSG00000129562	DAD1	protein_coding	1763.99	0.632262	0.146176	4.32534	1.52299e-05	0.00119097	Up Regulated in ART
ENSG00000155463	OXA1L	protein_coding	3792.63	0.443672	0.102134	4.34401	1.39907e-05	0.00110912	Up Regulated in ART
ENSG00000100836	PABPN1	protein_coding	1269.73	0.537833	0.125472	4.28648	1.81524e-05	0.00136419	Up Regulated in ART
ENSG00000129460	NGDN	protein_coding	952.457	0.7617	0.174569	4.36332	1.28102e-05	0.00103699	Up Regulated in ART
ENSG00000092010	PSME1	protein_coding	7590.49	0.385251	0.116087	3.31862	0.000904625	0.0219267	Up Regulated in ART
ENSG00000100445	SDR39U1	protein_coding	1181.22	0.584792	0.175467	3.33277	0.000859845	0.0212284	Up Regulated in ART
ENSG00000129493	HEATR5A	protein_coding	178.777	-0.704561	0.205224	-3.43314	0.000596638	0.0163668	Down Regulated in ART
ENSG00000165389	SPTSSA	protein_coding	446.858	-0.976911	0.251828	-3.87928	0.000104766	0.00492	Down Regulated in ART
ENSG00000129518	EAPP	protein_coding	987.647	0.811904	0.155358	5.22601	1.73211e-07	4.2609e-05	Up Regulated in ART
ENSG00000213741	RPS29	protein_coding	20782.9	1.71129	0.285181	6.00071	1.96458e-09	1.54327e-06	Up Regulated in ART
ENSG00000165502	RPL36AL	protein_coding	5794.34	1.13586	0.176723	6.42732	1.29875e-10	1.87041e-07	Up Regulated in ART
ENSG00000165527	ARF6	protein_coding	4528.89	0.368694	0.120432	3.06143	0.00220286	0.0394704	Up Regulated in ART
ENSG00000087299	L2HGDH	protein_coding	68.4358	-0.777931	0.24947	-3.11834	0.00181875	0.0350017	Down Regulated in ART
ENSG00000087302	RTRAF	protein_coding	2051.62	0.669135	0.112487	5.94855	2.70528e-09	2.03272e-06	Up Regulated in ART
ENSG00000178974	FBXO34	protein_coding	753.967	0.910255	0.189397	4.80606	1.53935e-06	0.000216285	Up Regulated in ART
ENSG00000070367	EXOC5	protein_coding	883.011	-0.654647	0.207121	-3.16071	0.00157388	0.0315176	Down Regulated in ART
ENSG00000100567	PSMA3	protein_coding	1111.89	0.499622	0.120575	4.14366	3.41804e-05	0.0021878	Up Regulated in ART
ENSG00000100575	TIMM9	protein_coding	412.819	0.55634	0.170964	3.25413	0.0011374	0.0253306	Up Regulated in ART
ENSG00000033170	FUT8	protein_coding	239.743	0.604013	0.1903	3.17401	0.00150347	0.0305683	Up Regulated in ART
ENSG00000198133	TMEM229B	protein_coding	579.983	-0.545268	0.171182	-3.18531	0.001446	0.0299065	Down Regulated in ART
ENSG00000100632	ERH	protein_coding	1282.78	0.781989	0.113505	6.88946	5.60057e-12	1.61315e-08	Up Regulated in ART
ENSG00000029364	SLC39A9	protein_coding	1011.45	0.360971	0.115704	3.11979	0.00180979	0.0348682	Up Regulated in ART
ENSG00000133997	MED6	protein_coding	338.482	0.599983	0.133731	4.48648	7.24098e-06	0.000676425	Up Regulated in ART
ENSG00000170468	RIOX1	protein_coding	242.536	0.773285	0.209455	3.69189	0.000222597	0.00852471	Up Regulated in ART
ENSG00000119711	ALDH6A1	protein_coding	178.275	-0.686468	0.228397	-3.00559	0.00265066	0.0451763	Down Regulated in ART
ENSG00000165898	ISCA2	protein_coding	295.131	0.68491	0.186072	3.68088	0.00023243	0.00875131	Up Regulated in ART
ENSG00000119705	SLIRP	protein_coding	340.29	1.04634	0.188021	5.565	2.62148e-08	1.02964e-05	Up Regulated in ART
ENSG00000100603	SNW1	protein_coding	1481	0.584449	0.125473	4.65795	3.19375e-06	0.00036366	Up Regulated in ART
ENSG00000165417	GTF2A1	protein_coding	637.326	-0.860589	0.245984	-3.49855	0.000467788	0.0138955	Down Regulated in ART
ENSG00000100764	PSMC1	protein_coding	1501.15	0.632961	0.109413	5.78504	7.24942e-09	4.0697e-06	Up Regulated in ART
ENSG00000133962	CATSPERB	protein_coding	39.4399	1.23817	0.413667	2.99316	0.00276106	0.0462454	Up Regulated in ART
ENSG00000183648	NDUFB1	protein_coding	530.434	1.60876	0.215132	7.47801	7.54552e-14	4.34672e-10	Up Regulated in ART
ENSG00000165934	CPSF2	protein_coding	903.187	-0.597727	0.180957	-3.30315	0.000956056	0.0227584	Down Regulated in ART
ENSG00000165943	MOAP1	protein_coding	1856.2	0.841696	0.237133	3.54947	0.000386012	0.0121096	Up Regulated in ART
ENSG00000089737	DDX24	protein_coding	3849.47	0.852305	0.201377	4.23238	2.31233e-05	0.00165131	Up Regulated in ART
ENSG00000165948	IFI27L1	protein_coding	80.207	0.824001	0.272603	3.02271	0.0025052	0.0433381	Up Regulated in ART
ENSG00000066739	ATG2B	protein_coding	1079.03	-0.70509	0.182939	-3.85424	0.000116088	0.00532159	Down Regulated in ART
ENSG00000100749	VRK1	protein_coding	420.846	0.388295	0.130965	2.96488	0.003028	0.0493876	Up Regulated in ART
ENSG00000197102	DYNC1H1	protein_coding	4992.2	-0.561905	0.165093	-3.40358	0.000665101	0.0177655	Down Regulated in ART
ENSG00000166170	BAG5	protein_coding	1133.99	0.672099	0.205687	3.26758	0.00108471	0.0245116	Up Regulated in ART
ENSG00000126214	KLC1	protein_coding	432.253	-0.815398	0.21341	-3.82082	0.000133011	0.00581949	Down Regulated in ART
ENSG00000156411	ATP5MPL	protein_coding	1762.36	0.999417	0.172825	5.78284	7.34495e-09	4.0697e-06	Up Regulated in ART
ENSG00000128739	SNRPN	protein_coding	215.532	-0.78851	0.16425	-4.80066	1.58141e-06	0.000216905	Down Regulated in ART
ENSG00000128731	HERC2	protein_coding	1229.78	-0.569933	0.165247	-3.44898	0.000562708	0.0156095	Down Regulated in ART
ENSG00000186399	GOLGA8R	protein_coding	45.0409	-1.59438	0.484129	-3.29329	0.000990222	0.0231884	Down Regulated in ART
ENSG00000134153	EMC7	protein_coding	927.747	0.636461	0.134355	4.73716	2.16733e-06	0.000267256	Up Regulated in ART
ENSG00000182405	PGBD4	protein_coding	87.7983	0.915159	0.267814	3.41714	0.000632826	0.0171688	Up Regulated in ART
ENSG00000175265	GOLGA8A	protein_coding	1975.41	-0.901432	0.254366	-3.54383	0.000394355	0.0123241	Down Regulated in ART
ENSG00000140319	SRP14	protein_coding	4125.53	0.770362	0.145092	5.30949	1.09934e-07	3.11455e-05	Up Regulated in ART
ENSG00000137841	PLCB2	protein_coding	9473.98	-0.455122	0.152817	-2.97822	0.00289927	0.047856	Down Regulated in ART
ENSG00000128891	CCDC32	protein_coding	530.364	0.481208	0.14808	3.24965	0.00115547	0.025634	Up Regulated in ART
ENSG00000166133	RPUSD2	protein_coding	231.712	0.723085	0.219154	3.29944	0.000968767	0.0228871	Up Regulated in ART
ENSG00000137815	RTF1	protein_coding	1572.76	0.281084	0.0948084	2.96476	0.00302921	0.0493876	Up Regulated in ART
ENSG00000166946	CCNDBP1	protein_coding	2271.96	0.276076	0.0897853	3.07485	0.0021061	0.0384347	Up Regulated in ART
ENSG00000140264	SERF2	protein_coding	9203.92	0.632295	0.210353	3.00587	0.00264822	0.0451763	Up Regulated in ART
ENSG00000166710	B2M	protein_coding	210336	0.40997	0.108206	3.78879	0.000151383	0.00644386	Up Regulated in ART
ENSG00000138594	TMOD3	protein_coding	1265.54	-0.679036	0.203114	-3.34313	0.000828394	0.0206883	Down Regulated in ART
ENSG00000260916	CCPG1	protein_coding	234.259	-1.10879	0.278964	-3.97468	7.04733e-05	0.00377065	Down Regulated in ART
ENSG00000129003	VPS13C	protein_coding	4145.47	-0.675021	0.215902	-3.12651	0.00176892	0.0343489	Down Regulated in ART
ENSG00000185088	RPS27L	protein_coding	853.056	0.461649	0.12764	3.61681	0.000298257	0.0102884	Up Regulated in ART
ENSG00000166794	PPIB	protein_coding	6263.68	0.521551	0.170872	3.05229	0.00227103	0.0404201	Up Regulated in ART
ENSG00000174446	SNAPC5	protein_coding	365.363	0.388844	0.127817	3.04219	0.00234865	0.04146	Up Regulated in ART
ENSG00000129007	CALML4	protein_coding	4.18825	-2.91275	0.840051	-3.46735	0.000525607	0.0149894	Down Regulated in ART
ENSG00000140497	SCAMP2	protein_coding	2360.25	-0.312459	0.102479	-3.049	0.00229605	0.0407815	Down Regulated in ART
ENSG00000178741	COX5A	protein_coding	1205.06	0.625901	0.151664	4.12689	3.67706e-05	0.00232772	Up Regulated in ART
ENSG00000177971	IMP3	protein_coding	586.347	0.545167	0.182435	2.98829	0.00280544	0.0466637	Up Regulated in ART
ENSG00000173548	SNX33	protein_coding	213.492	-0.731051	0.210882	-3.46664	0.000527013	0.0150047	Down Regulated in ART
ENSG00000185787	MORF4L1	protein_coding	5358.97	0.422448	0.128707	3.28225	0.00102981	0.0236774	Up Regulated in ART
ENSG00000166557	TMED3	protein_coding	875.107	0.523187	0.166644	3.13955	0.00169207	0.0331921	Up Regulated in ART
ENSG00000156232	WHAMM	protein_coding	1321.83	0.979113	0.258565	3.78673	0.000152645	0.00646572	Up Regulated in ART
ENSG00000169612	RAMAC	protein_coding	367.362	1.20616	0.229798	5.24878	1.53106e-07	3.94923e-05	Up Regulated in ART
ENSG00000157823	AP3S2	protein_coding	303.59	-0.639975	0.164091	-3.90011	9.61474e-05	0.00462847	Down Regulated in ART
ENSG00000103326	CAPN15	protein_coding	1012.77	-1.24583	0.390785	-3.18802	0.0014325	0.0298007	Down Regulated in ART
ENSG00000161996	WDR90	protein_coding	150.346	-0.997972	0.326383	-3.05767	0.00223063	0.0399065	Down Regulated in ART
ENSG00000059145	UNKL	protein_coding	327.437	-0.80023	0.235346	-3.40024	0.000673278	0.0179285	Down Regulated in ART
ENSG00000197599	CCDC154	protein_coding	71.256	-1.3057	0.377709	-3.45689	0.000546448	0.0153307	Down Regulated in ART
ENSG00000103249	CLCN7	protein_coding	2193.64	-0.88559	0.27764	-3.18971	0.00142417	0.0297253	Down Regulated in ART
ENSG00000007545	CRAMP1	protein_coding	409.2	-0.618136	0.15035	-4.11131	3.9342e-05	0.00248142	Down Regulated in ART
ENSG00000103197	TSC2	protein_coding	1496.94	-0.688124	0.191748	-3.58868	0.000332357	0.011021	Down Regulated in ART
ENSG00000008710	PKD1	protein_coding	1033.56	-1.32725	0.307523	-4.31596	1.58914e-05	0.00122605	Down Regulated in ART
ENSG00000162065	TBC1D24	protein_coding	145.216	-0.789623	0.203104	-3.88778	0.000101165	0.00482965	Down Regulated in ART
ENSG00000185883	ATP6V0C	protein_coding	37.5464	-1.44517	0.450005	-3.21144	0.00132071	0.0282831	Down Regulated in ART
ENSG00000006327	TNFRSF12A	protein_coding	65.5507	2.34163	0.778762	3.00687	0.00263956	0.045076	Up Regulated in ART
ENSG00000085644	ZNF213	protein_coding	135.292	-0.820358	0.261063	-3.14237	0.00167585	0.0330618	Down Regulated in ART
ENSG00000188827	SLX4	protein_coding	284.639	-0.809654	0.207545	-3.90111	9.57529e-05	0.00462235	Down Regulated in ART
ENSG00000217930	PAM16	protein_coding	94.4474	-1.06771	0.212565	-5.02299	5.08744e-07	9.75248e-05	Down Regulated in ART
ENSG00000038532	CLEC16A	protein_coding	662.084	-0.435069	0.110788	-3.92705	8.59926e-05	0.00429767	Down Regulated in ART
ENSG00000153066	TXNDC11	protein_coding	1542.55	0.813484	0.160398	5.07165	3.94385e-07	8.3119e-05	Up Regulated in ART
ENSG00000103429	BFAR	protein_coding	1151.11	0.605064	0.118811	5.09264	3.53112e-07	7.72465e-05	Up Regulated in ART
ENSG00000157045	NTAN1	protein_coding	755.213	0.595141	0.147724	4.02874	5.60771e-05	0.00320902	Up Regulated in ART
ENSG00000157106	SMG1	protein_coding	4971.03	-0.838259	0.214037	-3.91643	8.98715e-05	0.00442542	Down Regulated in ART
ENSG00000140743	AC092338.1	protein_coding	1175.1	0.783584	0.246752	3.1756	0.00149529	0.0304377	Up Regulated in ART
ENSG00000155592	ZKSCAN2	protein_coding	137.428	0.931629	0.275076	3.3868	0.000707116	0.0186003	Up Regulated in ART
ENSG00000184730	APOBR	protein_coding	1853.48	-0.749464	0.234578	-3.19494	0.0013986	0.0294404	Down Regulated in ART
ENSG00000168488	ATXN2L	protein_coding	3528.89	-0.376	0.116065	-3.23956	0.00119713	0.0263552	Down Regulated in ART
ENSG00000149932	TMEM219	protein_coding	1992.05	0.441498	0.135133	3.26713	0.00108644	0.0245116	Up Regulated in ART
ENSG00000149930	TAOK2	protein_coding	985.555	-0.6281	0.167309	-3.75413	0.000173943	0.00717444	Down Regulated in ART
ENSG00000149925	ALDOA	protein_coding	314.577	-1.83235	0.340086	-5.3879	7.12857e-08	2.32445e-05	Down Regulated in ART
ENSG00000179918	SEPHS2	protein_coding	989.797	0.449177	0.141786	3.16799	0.00153495	0.0309895	Up Regulated in ART
ENSG00000156853	ZNF689	protein_coding	299.145	0.671704	0.213852	3.14098	0.00168384	0.0331494	Up Regulated in ART
ENSG00000080603	SRCAP	protein_coding	137.698	-0.942513	0.30015	-3.14015	0.00168864	0.0331858	Down Regulated in ART
ENSG00000099364	FBXL19	protein_coding	250.137	-0.923226	0.266714	-3.46149	0.000537204	0.015229	Down Regulated in ART
ENSG00000185947	ZNF267	protein_coding	762.566	1.11166	0.312442	3.55796	0.000373743	0.0118966	Up Regulated in ART
ENSG00000069345	DNAJA2	protein_coding	1213.42	0.409444	0.135955	3.0116	0.00259875	0.0445551	Up Regulated in ART
ENSG00000121281	ADCY7	protein_coding	7282.61	-0.792916	0.130616	-6.07058	1.27449e-09	1.10129e-06	Down Regulated in ART
ENSG00000159461	AMFR	protein_coding	1890.48	0.391124	0.115947	3.3733	0.000742739	0.0191966	Up Regulated in ART
ENSG00000102978	POLR2C	protein_coding	1409.53	0.43538	0.11202	3.88662	0.000101649	0.00483938	Up Regulated in ART
ENSG00000089505	CMTM1	protein_coding	17.4664	-1.52617	0.467879	-3.26189	0.00110672	0.0246809	Down Regulated in ART
ENSG00000168701	TMEM208	protein_coding	422.031	0.585737	0.164203	3.56715	0.000360879	0.0117012	Up Regulated in ART
ENSG00000102898	NUTF2	protein_coding	980.2	0.505078	0.107894	4.68126	2.85122e-06	0.000335528	Up Regulated in ART
ENSG00000182810	DDX28	protein_coding	435.144	0.771578	0.175342	4.40041	1.08045e-05	0.000915312	Up Regulated in ART
ENSG00000103056	SMPD3	protein_coding	122.865	-1.17249	0.250334	-4.68371	2.81723e-06	0.000335528	Down Regulated in ART
ENSG00000103047	TANGO6	protein_coding	496.532	0.543557	0.155421	3.49733	0.000469945	0.0139307	Up Regulated in ART
ENSG00000141076	UTP4	protein_coding	562.292	0.664575	0.15148	4.3872	1.14817e-05	0.000953975	Up Regulated in ART
ENSG00000132603	NIP7	protein_coding	580.753	0.643523	0.178991	3.59528	0.000324048	0.0108742	Up Regulated in ART
ENSG00000157349	DDX19B	protein_coding	466.552	0.34671	0.0991802	3.49576	0.000472719	0.0139889	Up Regulated in ART
ENSG00000103043	VAC14	protein_coding	671.23	-0.447005	0.144954	-3.08378	0.00204389	0.0376172	Down Regulated in ART
ENSG00000065427	KARS	protein_coding	3780.61	0.307834	0.0845374	3.6414	0.000271163	0.00976299	Up Regulated in ART
ENSG00000166848	TERF2IP	protein_coding	2480.99	0.589734	0.192344	3.06604	0.00216913	0.0391255	Up Regulated in ART
ENSG00000140950	MEAK7	protein_coding	126.908	-0.700051	0.159156	-4.39851	1.08997e-05	0.000918867	Down Regulated in ART
ENSG00000131149	GSE1	protein_coding	1730.99	-0.586123	0.1736	-3.37629	0.000734711	0.019065	Down Regulated in ART
ENSG00000131143	COX4I1	protein_coding	9860.42	0.770853	0.160552	4.80127	1.57659e-06	0.000216905	Up Regulated in ART
ENSG00000103248	MTHFSD	protein_coding	250.906	-0.600644	0.180251	-3.33226	0.000861435	0.0212373	Down Regulated in ART
ENSG00000140948	ZCCHC14	protein_coding	488.407	-0.641938	0.16207	-3.96088	7.46756e-05	0.00389892	Down Regulated in ART
ENSG00000103335	PIEZO1	protein_coding	3813.47	-0.833573	0.235493	-3.53969	0.000400596	0.012422	Down Regulated in ART
ENSG00000141012	GALNS	protein_coding	681.322	-0.610382	0.190809	-3.19892	0.00137944	0.0292509	Down Regulated in ART
ENSG00000167515	TRAPPC2L	protein_coding	675.989	0.655123	0.165715	3.9533	7.70803e-05	0.00397746	Up Regulated in ART
ENSG00000167526	RPL13	protein_coding	36134	0.800267	0.250428	3.19559	0.00139544	0.0294404	Up Regulated in ART
ENSG00000179409	GEMIN4	protein_coding	416.034	0.571252	0.175085	3.26271	0.00110354	0.0246718	Up Regulated in ART
ENSG00000177370	TIMM22	protein_coding	329.525	0.397734	0.133928	2.96975	0.00298045	0.048817	Up Regulated in ART
ENSG00000167721	TSR1	protein_coding	711.317	0.355874	0.10197	3.48998	0.000483063	0.0141497	Up Regulated in ART
ENSG00000083457	ITGAE	protein_coding	465.469	0.790378	0.166241	4.75441	1.99029e-06	0.000256689	Up Regulated in ART
ENSG00000142507	PSMB6	protein_coding	1513.91	0.46786	0.14054	3.32901	0.000871542	0.021397	Up Regulated in ART
ENSG00000108509	CAMTA2	protein_coding	1835.48	-0.446463	0.14193	-3.14565	0.00165718	0.0328057	Down Regulated in ART
ENSG00000108559	NUP88	protein_coding	1038.81	0.594344	0.134389	4.42256	9.75366e-06	0.000855649	Up Regulated in ART
ENSG00000108561	C1QBP	protein_coding	1315.53	0.597112	0.12778	4.67298	2.96856e-06	0.00034664	Up Regulated in ART
ENSG00000005100	DHX33	protein_coding	440.725	-0.538481	0.131714	-4.08826	4.34612e-05	0.00265405	Down Regulated in ART
ENSG00000286190	AC055839.2	protein_coding	171.711	-0.873172	0.257903	-3.38567	0.000710057	0.018621	Down Regulated in ART
ENSG00000170296	GABARAP	protein_coding	670.262	-1.748	0.18096	-9.65961	4.47545e-22	7.73448e-18	Down Regulated in ART
ENSG00000132507	EIF5A	protein_coding	5029.94	0.60204	0.133304	4.5163	6.29297e-06	0.000612758	Up Regulated in ART
ENSG00000205544	TMEM256	protein_coding	155.823	0.767149	0.238337	3.21876	0.00128746	0.0277429	Up Regulated in ART
ENSG00000161956	SENP3	protein_coding	216.462	-0.6616	0.16249	-4.07163	4.66861e-05	0.00279696	Down Regulated in ART
ENSG00000161960	EIF4A1	protein_coding	1330.65	-1.32717	0.258606	-5.13201	2.86669e-07	6.51871e-05	Down Regulated in ART
ENSG00000161970	RPL26	protein_coding	3059.14	-0.740148	0.18918	-3.91241	9.13802e-05	0.00447375	Down Regulated in ART
ENSG00000170222	ADPRM	protein_coding	470.514	1.42545	0.227221	6.27341	3.53227e-10	4.06965e-07	Up Regulated in ART
ENSG00000170160	CCDC144A	protein_coding	71.5801	-5.88215	1.25659	-4.68106	2.85399e-06	0.000335528	Down Regulated in ART
ENSG00000266302	AC098850.3	protein_coding	21.3646	-6.89107	1.33732	-5.15289	2.56498e-07	5.95698e-05	Down Regulated in ART
ENSG00000179598	PLD6	protein_coding	86.4112	1.52305	0.363494	4.19001	2.7894e-05	0.00191061	Up Regulated in ART
ENSG00000141026	MED9	protein_coding	208.313	0.895689	0.261757	3.42184	0.000621992	0.016928	Up Regulated in ART
ENSG00000108551	RASD1	protein_coding	47.2666	-2.19428	0.390092	-5.62504	1.85461e-08	7.87209e-06	Down Regulated in ART
ENSG00000108557	RAI1	protein_coding	375.272	-1.1579	0.251815	-4.59823	4.26093e-06	0.000454552	Down Regulated in ART
ENSG00000141034	GID4	protein_coding	298.617	-0.652677	0.215667	-3.02632	0.00247551	0.0429535	Down Regulated in ART
ENSG00000244045	TMEM199	protein_coding	420.109	0.521753	0.128091	4.07331	4.63489e-05	0.00279095	Up Regulated in ART
ENSG00000167524	RSKR	protein_coding	175.517	-0.928523	0.224699	-4.1323	3.59151e-05	0.00228577	Down Regulated in ART
ENSG00000198242	RPL23A	protein_coding	28382.3	0.775314	0.17659	4.39047	1.13106e-05	0.000945123	Up Regulated in ART
ENSG00000172301	COPRS	protein_coding	161.859	0.75844	0.201099	3.77147	0.000162286	0.00679084	Up Regulated in ART
ENSG00000198783	ZNF830	protein_coding	287.556	1.05605	0.201996	5.22805	1.71303e-07	4.2609e-05	Up Regulated in ART
ENSG00000172123	SLFN12	protein_coding	261.443	-0.622356	0.193884	-3.20994	0.00132763	0.0283611	Down Regulated in ART
ENSG00000273611	ZNHIT3	protein_coding	738.342	0.558655	0.143053	3.90522	9.41392e-05	0.00456998	Up Regulated in ART
ENSG00000125691	RPL23	protein_coding	32494.5	1.0673	0.199109	5.3604	8.30383e-08	2.56262e-05	Up Regulated in ART
ENSG00000263874	LINC00672	protein_coding	141.006	-0.939343	0.252727	-3.71683	0.000201736	0.00795981	Down Regulated in ART
ENSG00000131759	RARA	protein_coding	1589.23	-0.8746	0.223778	-3.90834	9.2933e-05	0.00452414	Down Regulated in ART
ENSG00000186395	KRT10	protein_coding	347.173	1.14101	0.225647	5.05663	4.26731e-07	8.6762e-05	Up Regulated in ART
ENSG00000131469	RPL27	protein_coding	24303.4	1.08786	0.225043	4.834	1.33815e-06	0.000197658	Up Regulated in ART
ENSG00000004939	SLC4A1	protein_coding	82.868	3.73266	1.20505	3.09751	0.00195155	0.0365403	Up Regulated in ART
ENSG00000186834	HEXIM1	protein_coding	1377.6	-1.18167	0.204492	-5.77853	7.5356e-09	4.0697e-06	Down Regulated in ART
ENSG00000120093	HOXB3	protein_coding	88.4504	-1.22762	0.352798	-3.47968	0.000502019	0.0145082	Down Regulated in ART
ENSG00000159199	ATP5MC1	protein_coding	845.065	0.758452	0.156097	4.85885	1.18071e-06	0.00018383	Up Regulated in ART
ENSG00000159202	UBE2Z	protein_coding	2124.05	0.345104	0.103197	3.34411	0.000825468	0.0206451	Up Regulated in ART
ENSG00000121073	SLC35B1	protein_coding	754.861	0.395896	0.11542	3.43004	0.000603487	0.0165285	Up Regulated in ART
ENSG00000005882	PDK2	protein_coding	426.848	-0.512029	0.160357	-3.19307	0.0014077	0.0295601	Down Regulated in ART
ENSG00000108826	MRPL27	protein_coding	327.228	0.704567	0.227984	3.09042	0.00199872	0.0371019	Up Regulated in ART
ENSG00000011260	UTP18	protein_coding	710.158	0.445828	0.123422	3.61223	0.000303581	0.010411	Up Regulated in ART
ENSG00000181610	MRPS23	protein_coding	491.113	0.593004	0.15483	3.83004	0.000128124	0.00561989	Up Regulated in ART
ENSG00000136450	SRSF1	protein_coding	726.22	-0.898456	0.24714	-3.63541	0.000277542	0.0099512	Down Regulated in ART
ENSG00000175155	YPEL2	protein_coding	1757.69	0.668766	0.195068	3.42837	0.000607213	0.0166042	Up Regulated in ART
ENSG00000141378	PTRH2	protein_coding	218.594	0.662854	0.207089	3.20081	0.0013704	0.0291308	Up Regulated in ART
ENSG00000146872	TLK2	protein_coding	980.014	0.601639	0.130608	4.60645	4.09611e-06	0.000442431	Up Regulated in ART
ENSG00000136485	DCAF7	protein_coding	1464.92	-0.735161	0.228175	-3.22193	0.00127332	0.0275414	Down Regulated in ART
ENSG00000136463	TACO1	protein_coding	255.311	0.916544	0.189866	4.82731	1.38389e-06	0.000202682	Up Regulated in ART
ENSG00000108946	PRKAR1A	protein_coding	3148.71	-0.822189	0.258233	-3.1839	0.00145303	0.0299301	Down Regulated in ART
ENSG00000154265	ABCA5	protein_coding	626.919	-0.909689	0.29236	-3.11154	0.00186113	0.035384	Down Regulated in ART
ENSG00000172809	RPL38	protein_coding	12751.5	1.26307	0.213301	5.92152	3.18982e-09	2.20506e-06	Up Regulated in ART
ENSG00000141540	TTYH2	protein_coding	868.285	-0.763216	0.183443	-4.16052	3.1753e-05	0.00210251	Down Regulated in ART
ENSG00000171595	DNAI2	protein_coding	28.8917	-1.27873	0.341696	-3.74232	0.000182331	0.00744855	Down Regulated in ART
ENSG00000257008	GPR142	protein_coding	1.29223	-4.20512	1.36911	-3.07142	0.00213042	0.0386742	Down Regulated in ART
ENSG00000109066	TMEM104	protein_coding	400.22	-0.542066	0.17989	-3.01331	0.00258414	0.0443487	Down Regulated in ART
ENSG00000167862	MRPL58	protein_coding	281.371	0.543514	0.163239	3.32957	0.000869817	0.021397	Up Regulated in ART
ENSG00000180901	KCTD2	protein_coding	1170.65	0.409627	0.131066	3.12534	0.001776	0.0344476	Up Regulated in ART
ENSG00000167863	ATP5PD	protein_coding	1855.16	0.68003	0.132983	5.11366	3.15979e-07	7.09187e-05	Up Regulated in ART
ENSG00000125445	MRPS7	protein_coding	819.287	0.453573	0.137446	3.3	0.000966856	0.0228871	Up Regulated in ART
ENSG00000073350	LLGL2	protein_coding	909.453	-1.13223	0.365864	-3.09467	0.00197034	0.0367329	Down Regulated in ART
ENSG00000167881	SRP68	protein_coding	1301.52	0.318999	0.10264	3.10794	0.00188397	0.0357396	Up Regulated in ART
ENSG00000181045	SLC26A11	protein_coding	727.619	-0.711565	0.2055	-3.4626	0.000534978	0.0152064	Down Regulated in ART
ENSG00000173821	AC124319.1	protein_coding	15769.8	-0.721529	0.240493	-3.00021	0.00269795	0.0454888	Down Regulated in ART
ENSG00000141577	CEP131	protein_coding	138.291	-1.09874	0.369118	-2.97666	0.00291404	0.048008	Down Regulated in ART
ENSG00000224877	NDUFAF8	protein_coding	206.946	1.04817	0.243505	4.30451	1.67354e-05	0.00127974	Up Regulated in ART
ENSG00000157637	SLC38A10	protein_coding	2082.71	-0.95847	0.290537	-3.29896	0.000970447	0.0228871	Down Regulated in ART
ENSG00000169683	LRRC45	protein_coding	291.664	-0.896153	0.28046	-3.1953	0.00139688	0.0294404	Down Regulated in ART
ENSG00000169710	FASN	protein_coding	564.766	-1.03887	0.296921	-3.4988	0.000467357	0.0138955	Down Regulated in ART
ENSG00000101605	MYOM1	protein_coding	117.223	-1.02233	0.329555	-3.10215	0.00192124	0.0361293	Down Regulated in ART
ENSG00000101608	MYL12A	protein_coding	12153	0.347756	0.105155	3.30707	0.000942763	0.0225662	Up Regulated in ART
ENSG00000118680	MYL12B	protein_coding	7635.32	0.530319	0.115542	4.58985	4.43556e-06	0.000470278	Up Regulated in ART
ENSG00000017797	RALBP1	protein_coding	1328.73	-0.454239	0.135957	-3.34105	0.000834629	0.0208139	Down Regulated in ART
ENSG00000167088	SNRPD1	protein_coding	785.087	0.793511	0.178392	4.44814	8.66173e-06	0.000779646	Up Regulated in ART
ENSG00000141384	TAF4B	protein_coding	260.141	0.790364	0.255815	3.08959	0.00200432	0.0371262	Up Regulated in ART
ENSG00000141428	C18orf21	protein_coding	314.089	0.629319	0.173601	3.62508	0.000288871	0.0101883	Up Regulated in ART
ENSG00000167220	HDHD2	protein_coding	167.559	-0.965229	0.271566	-3.55431	0.000378973	0.0120173	Down Regulated in ART
ENSG00000265681	RPL17	protein_coding	421.186	-1.15487	0.212917	-5.42405	5.82632e-08	2.05491e-05	Down Regulated in ART
ENSG00000166479	TMX3	protein_coding	1302.82	-0.787727	0.192621	-4.08952	4.32258e-05	0.00264904	Down Regulated in ART
ENSG00000060069	CTDP1	protein_coding	509.979	-0.689181	0.199209	-3.45958	0.000541014	0.0152685	Down Regulated in ART
ENSG00000247315	ZCCHC3	protein_coding	584.455	0.563092	0.118849	4.7379	2.15949e-06	0.000267256	Up Regulated in ART
ENSG00000125834	STK35	protein_coding	537.099	0.391657	0.11913	3.28764	0.0010103	0.0234362	Up Regulated in ART
ENSG00000101365	IDH3B	protein_coding	2088.33	0.377343	0.106309	3.5495	0.000385959	0.0121096	Up Regulated in ART
ENSG00000215251	FASTKD5	protein_coding	878.298	0.9134	0.26169	3.49039	0.000482311	0.0141497	Up Regulated in ART
ENSG00000171984	SHLD1	protein_coding	135.591	0.806884	0.215242	3.74873	0.000177733	0.00729592	Up Regulated in ART
ENSG00000232388	SMIM26	protein_coding	383.647	0.865446	0.176856	4.89349	9.90629e-07	0.00016633	Up Regulated in ART
ENSG00000101343	CRNKL1	protein_coding	647.491	0.714581	0.232949	3.06754	0.00215826	0.0390566	Up Regulated in ART
ENSG00000132661	NXT1	protein_coding	435.374	0.882273	0.262104	3.36612	0.000762337	0.0195181	Up Regulated in ART
ENSG00000088356	PDRG1	protein_coding	343.309	0.615147	0.147017	4.1842	2.86168e-05	0.00193186	Up Regulated in ART
ENSG00000101346	POFUT1	protein_coding	894.58	-0.404292	0.114144	-3.54193	0.000397211	0.012391	Down Regulated in ART
ENSG00000125971	DYNLRB1	protein_coding	1350.27	0.476026	0.150025	3.17299	0.00150877	0.0306399	Up Regulated in ART
ENSG00000131043	AAR2	protein_coding	762.803	0.652382	0.176779	3.69037	0.000223928	0.00852471	Up Regulated in ART
ENSG00000080845	DLGAP4	protein_coding	880.288	-0.515892	0.112089	-4.6025	4.17441e-06	0.000448088	Down Regulated in ART
ENSG00000101084	RAB5IF	protein_coding	99.5313	-0.839569	0.251697	-3.33563	0.000851065	0.021102	Down Regulated in ART
ENSG00000118705	RPN2	protein_coding	5185.43	0.295668	0.0790437	3.74057	0.000183606	0.00744855	Up Regulated in ART
ENSG00000101363	MANBAL	protein_coding	198.924	0.534975	0.148685	3.59804	0.00032063	0.0108314	Up Regulated in ART
ENSG00000204070	SYS1	protein_coding	823.147	0.598097	0.199337	3.00043	0.00269597	0.0454888	Up Regulated in ART
ENSG00000168612	ZSWIM1	protein_coding	95.726	0.97842	0.216855	4.51186	6.42621e-06	0.000616987	Up Regulated in ART
ENSG00000100982	PCIF1	protein_coding	1162.02	0.47721	0.110523	4.31774	1.57638e-05	0.00122605	Up Regulated in ART
ENSG00000000419	DPM1	protein_coding	537.783	0.61057	0.175375	3.48151	0.000498595	0.0144576	Up Regulated in ART
ENSG00000101132	PFDN4	protein_coding	371.008	0.760371	0.180013	4.22398	2.40022e-05	0.00169308	Up Regulated in ART
ENSG00000101138	CSTF1	protein_coding	371.205	0.5692	0.143415	3.9689	7.22046e-05	0.00381603	Up Regulated in ART
ENSG00000101146	RAE1	protein_coding	737.321	0.403427	0.136139	2.96335	0.00304308	0.0495669	Up Regulated in ART
ENSG00000254995	STX16-NPEPL1	protein_coding	226.446	-0.803849	0.270958	-2.96669	0.0030102	0.0492169	Down Regulated in ART
ENSG00000215440	NPEPL1	protein_coding	372.737	-0.8314	0.238466	-3.48645	0.000489484	0.0142893	Down Regulated in ART
ENSG00000087460	GNAS	protein_coding	18257.5	0.370576	0.101184	3.6624	0.000249862	0.00916796	Up Regulated in ART
ENSG00000124172	ATP5F1E	protein_coding	6496.85	0.941356	0.167173	5.63104	1.79125e-08	7.87209e-06	Up Regulated in ART
ENSG00000130699	TAF4	protein_coding	486.92	-0.519471	0.151578	-3.42708	0.000610115	0.0166572	Down Regulated in ART
ENSG00000101182	PSMA7	protein_coding	2800.97	0.417187	0.116528	3.58016	0.00034339	0.0112395	Up Regulated in ART
ENSG00000184402	SS18L1	protein_coding	363.608	-0.568536	0.143243	-3.96904	7.21624e-05	0.00381603	Down Regulated in ART
ENSG00000171858	RPS21	protein_coding	10787.9	1.19589	0.281142	4.25368	2.10282e-05	0.00154121	Up Regulated in ART
ENSG00000026036	RTEL1-TNFRSF6B	protein_coding	56.3035	-1.07343	0.335844	-3.19623	0.00139235	0.0294404	Down Regulated in ART
ENSG00000273154	AL121845.3	protein_coding	6.45151	-3.15397	0.662075	-4.76376	1.90019e-06	0.00024691	Down Regulated in ART
ENSG00000141933	TPGS1	protein_coding	31.8399	-1.47551	0.47091	-3.13333	0.00172837	0.033713	Down Regulated in ART
ENSG00000116017	ARID3A	protein_coding	462.645	-0.752765	0.241471	-3.11742	0.00182442	0.0350719	Down Regulated in ART
ENSG00000099622	CIRBP	protein_coding	7830.23	0.398914	0.128102	3.11404	0.00184545	0.0352339	Up Regulated in ART
ENSG00000133243	BTBD2	protein_coding	964.232	-0.901588	0.290613	-3.10236	0.00191984	0.0361293	Down Regulated in ART
ENSG00000104885	DOT1L	protein_coding	602.735	-0.926536	0.254443	-3.64143	0.000271125	0.00976299	Down Regulated in ART
ENSG00000176619	LMNB2	protein_coding	399.36	-0.703728	0.22296	-3.15629	0.00159787	0.0318873	Down Regulated in ART
ENSG00000183397	C19orf71	protein_coding	33.7249	-1.49553	0.457983	-3.26546	0.00109285	0.0245576	Down Regulated in ART
ENSG00000186111	PIP5K1C	protein_coding	814.662	-0.715193	0.209831	-3.40843	0.000653383	0.0175299	Down Regulated in ART
ENSG00000183617	MRPL54	protein_coding	743.986	1.17156	0.267886	4.37336	1.22347e-05	0.00100055	Up Regulated in ART
ENSG00000074842	MYDGF	protein_coding	908.25	0.646579	0.204239	3.1658	0.00154657	0.0311877	Up Regulated in ART
ENSG00000105426	PTPRS	protein_coding	85.7993	-1.51617	0.365846	-4.14429	3.4087e-05	0.0021878	Down Regulated in ART
ENSG00000130382	MLLT1	protein_coding	743.381	-0.483192	0.16251	-2.9733	0.00294612	0.0483982	Down Regulated in ART
ENSG00000268861	AC008878.3	protein_coding	8.48837	-6.56196	0.999411	-6.56583	5.17444e-11	8.12952e-08	Down Regulated in ART
ENSG00000229833	PET100	protein_coding	200.954	0.67602	0.201924	3.3479	0.000814268	0.0204241	Up Regulated in ART
ENSG00000198258	UBL5	protein_coding	2089.24	0.873196	0.193898	4.50337	6.68853e-06	0.000635116	Up Regulated in ART
ENSG00000161847	RAVER1	protein_coding	225.15	-1.56711	0.355847	-4.40388	1.06334e-05	0.000905252	Down Regulated in ART
ENSG00000105397	TYK2	protein_coding	4161.59	-0.630434	0.200861	-3.13865	0.00169728	0.0332191	Down Regulated in ART
ENSG00000129355	CDKN2D	protein_coding	2619.86	0.78922	0.217197	3.63366	0.000279432	0.00996429	Up Regulated in ART
ENSG00000127616	SMARCA4	protein_coding	1411.31	-0.468457	0.128494	-3.64575	0.000266612	0.0096393	Down Regulated in ART
ENSG00000198551	ZNF627	protein_coding	172.745	1.04214	0.215444	4.83719	1.3169e-06	0.000196196	Up Regulated in ART
ENSG00000196757	ZNF700	protein_coding	412.361	-0.594327	0.177392	-3.35036	0.000807072	0.0203025	Down Regulated in ART
ENSG00000196646	ZNF136	protein_coding	390.764	1.19089	0.250948	4.74557	2.07917e-06	0.000262279	Up Regulated in ART
ENSG00000173875	ZNF791	protein_coding	665.364	0.469528	0.14343	3.27358	0.00106196	0.024244	Up Regulated in ART
ENSG00000123144	TRIR	protein_coding	2686.08	0.717451	0.201647	3.55796	0.000373752	0.0118966	Up Regulated in ART
ENSG00000132024	CC2D1A	protein_coding	586.809	-0.774205	0.215187	-3.59782	0.000320894	0.0108314	Down Regulated in ART
ENSG00000141854	MISP3	protein_coding	65.1336	1.20575	0.403269	2.98995	0.00279023	0.0465452	Up Regulated in ART
ENSG00000141867	BRD4	protein_coding	1598.99	-0.478663	0.129707	-3.69035	0.000223945	0.00852471	Down Regulated in ART
ENSG00000011451	WIZ	protein_coding	515.533	-0.922541	0.255035	-3.61732	0.000297674	0.0102884	Down Regulated in ART
ENSG00000186204	CYP4F12	protein_coding	11.9867	-2.21479	0.695358	-3.18511	0.00144701	0.0299065	Down Regulated in ART
ENSG00000072958	AP1M1	protein_coding	1622.17	-0.527699	0.167652	-3.14758	0.00164627	0.0326646	Down Regulated in ART
ENSG00000085872	CHERP	protein_coding	550.732	-0.645867	0.197724	-3.26651	0.00108883	0.0245335	Down Regulated in ART
ENSG00000099331	MYO9B	protein_coding	5535.41	-0.545967	0.171526	-3.183	0.0014576	0.0299527	Down Regulated in ART
ENSG00000130304	SLC27A1	protein_coding	423.801	-0.773273	0.23771	-3.25301	0.00114188	0.0253977	Down Regulated in ART
ENSG00000099308	MAST3	protein_coding	1603.05	-0.73288	0.181529	-4.03726	5.40795e-05	0.00315744	Down Regulated in ART
ENSG00000221983	UBA52	protein_coding	22109.6	0.715798	0.162246	4.4118	1.02513e-05	0.000884454	Up Regulated in ART
ENSG00000105662	CRTC1	protein_coding	394.58	-0.701162	0.207405	-3.38065	0.000723158	0.0188501	Down Regulated in ART
ENSG00000213999	MEF2B	protein_coding	4.64136	-2.32596	0.705159	-3.29849	0.000972061	0.0228871	Down Regulated in ART
ENSG00000129933	MAU2	protein_coding	1715.28	-0.310291	0.0993193	-3.12418	0.00178303	0.0345065	Down Regulated in ART
ENSG00000181896	ZNF101	protein_coding	1023.5	0.972307	0.223274	4.35477	1.33208e-05	0.00106579	Up Regulated in ART
ENSG00000118620	ZNF430	protein_coding	471.21	0.899136	0.222446	4.04204	5.29872e-05	0.00310415	Up Regulated in ART
ENSG00000169021	UQCRFS1	protein_coding	1758.12	0.560403	0.15065	3.71991	0.000199293	0.00792912	Up Regulated in ART
ENSG00000178904	DPY19L3	protein_coding	393.301	-0.611527	0.169055	-3.61734	0.00029765	0.0102884	Down Regulated in ART
ENSG00000105677	TMEM147	protein_coding	701.462	0.54067	0.169491	3.18996	0.00142291	0.0297253	Up Regulated in ART
ENSG00000126267	COX6B1	protein_coding	3078.89	0.819714	0.177491	4.61834	3.86816e-06	0.000425794	Up Regulated in ART
ENSG00000272333	KMT2B	protein_coding	1860.96	-0.613653	0.199325	-3.07866	0.00207935	0.0380269	Down Regulated in ART
ENSG00000189042	ZNF567	protein_coding	197.243	0.536732	0.177258	3.02798	0.00246196	0.0428044	Up Regulated in ART
ENSG00000196967	ZNF585A	protein_coding	119.324	-0.654841	0.180341	-3.63113	0.000282181	0.0100137	Down Regulated in ART
ENSG00000178982	EIF3K	protein_coding	5666.26	0.515381	0.146125	3.52699	0.000420309	0.0128264	Up Regulated in ART
ENSG00000130402	ACTN4	protein_coding	3221.49	-0.726455	0.19861	-3.6577	0.000254491	0.00929834	Down Regulated in ART
ENSG00000130755	GMFG	protein_coding	6570.05	0.655619	0.13479	4.86402	1.15026e-06	0.000180717	Up Regulated in ART
ENSG00000179134	SAMD4B	protein_coding	781.145	-0.554357	0.13065	-4.24305	2.20498e-05	0.00160111	Down Regulated in ART
ENSG00000105193	RPS16	protein_coding	24769.8	0.855041	0.231632	3.69138	0.000223041	0.00852471	Up Regulated in ART
ENSG00000176396	EID2	protein_coding	236.584	0.906699	0.17205	5.26996	1.3645e-07	3.74306e-05	Up Regulated in ART
ENSG00000079432	CIC	protein_coding	2000.11	-0.77689	0.257257	-3.0199	0.00252862	0.0436559	Down Regulated in ART
ENSG00000105429	MEGF8	protein_coding	332.196	-0.671545	0.16467	-4.07812	4.54017e-05	0.00276279	Down Regulated in ART
ENSG00000167384	ZNF180	protein_coding	269.876	0.504065	0.167014	3.01809	0.0025437	0.0438288	Up Regulated in ART
ENSG00000104853	CLPTM1	protein_coding	1264.1	-0.370773	0.117274	-3.16159	0.00156909	0.0314948	Down Regulated in ART
ENSG00000189114	BLOC1S3	protein_coding	235.719	0.600437	0.155068	3.8721	0.000107903	0.00502636	Up Regulated in ART
ENSG00000125743	SNRPD2	protein_coding	3559.52	0.856067	0.225573	3.79508	0.000147595	0.0063137	Up Regulated in ART
ENSG00000130749	AC008755.1	protein_coding	642.41	-0.610476	0.155663	-3.92177	8.78993e-05	0.00436516	Down Regulated in ART
ENSG00000105483	CARD8	protein_coding	3595.21	-0.480307	0.114859	-4.1817	2.89333e-05	0.00194562	Down Regulated in ART
ENSG00000142534	RPS11	protein_coding	54113.5	0.657053	0.16351	4.01842	5.85887e-05	0.00331977	Up Regulated in ART
ENSG00000126464	PRR12	protein_coding	716.454	-1.14021	0.269071	-4.23758	2.25939e-05	0.00163151	Down Regulated in ART
ENSG00000187474	FPR3	protein_coding	85.0746	-2.33992	0.464039	-5.0425	4.59477e-07	9.23335e-05	Down Regulated in ART
ENSG00000198093	ZNF649	protein_coding	154.626	0.701663	0.200815	3.49407	0.000475711	0.0140055	Up Regulated in ART
ENSG00000256683	ZNF350	protein_coding	425.636	0.810181	0.206772	3.91823	8.92e-05	0.00441706	Up Regulated in ART
ENSG00000196214	ZNF766	protein_coding	521.125	0.742228	0.214597	3.45871	0.000542768	0.0152771	Up Regulated in ART
ENSG00000213799	ZNF845	protein_coding	301.867	1.04908	0.311008	3.37316	0.000743115	0.0191966	Up Regulated in ART
ENSG00000170889	RPS9	protein_coding	27307.4	0.686323	0.229302	2.9931	0.00276162	0.0462454	Up Regulated in ART
ENSG00000239961	LILRA4	protein_coding	159.296	-1.09738	0.35798	-3.06548	0.00217321	0.0391255	Down Regulated in ART
ENSG00000198300	PEG3	protein_coding	2.45821	-3.88214	1.26007	-3.08089	0.0020638	0.0379028	Down Regulated in ART
ENSG00000178229	ZNF543	protein_coding	44.732	1.01454	0.289561	3.50373	0.000458797	0.0137417	Up Regulated in ART
ENSG00000083817	ZNF416	protein_coding	86.3409	1.01474	0.279317	3.63294	0.000280213	0.00996429	Up Regulated in ART
ENSG00000213762	ZNF134	protein_coding	581.792	1.0586	0.268993	3.93543	8.30473e-05	0.00418432	Up Regulated in ART
ENSG00000204519	ZNF551	protein_coding	311.314	1.11922	0.294997	3.79401	0.000148233	0.00632532	Up Regulated in ART
ENSG00000083828	ZNF586	protein_coding	549.15	0.739236	0.180672	4.0916	4.28401e-05	0.00263474	Up Regulated in ART
ENSG00000178935	ZNF552	protein_coding	170.529	0.653878	0.175824	3.71894	0.000200059	0.00792985	Up Regulated in ART
ENSG00000152454	ZNF256	protein_coding	195.825	0.902847	0.275635	3.27552	0.00105468	0.0241098	Up Regulated in ART
ENSG00000099326	MZF1	protein_coding	460.924	-0.691738	0.19554	-3.53758	0.000403813	0.012462	Down Regulated in ART
ENSG00000114374	USP9Y	protein_coding	922.411	2.77909	0.785974	3.53585	0.000406467	0.0124992	Up Regulated in ART
ENSG00000012817	KDM5D	protein_coding	1948.14	1.96475	0.591328	3.3226	0.000891828	0.0216773	Up Regulated in ART
ENSG00000100084	HIRA	protein_coding	242.457	-0.917838	0.245742	-3.73497	0.000187738	0.00759835	Down Regulated in ART
ENSG00000070010	UFD1	protein_coding	1424.27	0.589963	0.121731	4.84646	1.25684e-06	0.000192219	Up Regulated in ART
ENSG00000099901	RANBP1	protein_coding	611.432	0.624836	0.170596	3.66265	0.000249615	0.00916796	Up Regulated in ART
ENSG00000185252	ZNF74	protein_coding	187.01	-0.706203	0.235157	-3.00312	0.00267231	0.045276	Down Regulated in ART
ENSG00000099917	MED15	protein_coding	2473.94	-0.676594	0.198249	-3.41285	0.000642865	0.0173783	Down Regulated in ART
ENSG00000241973	PI4KA	protein_coding	3450.32	-0.360634	0.115819	-3.11377	0.00184712	0.0352339	Down Regulated in ART
ENSG00000099949	LZTR1	protein_coding	485.099	-0.606847	0.192937	-3.1453	0.00165915	0.0328071	Down Regulated in ART
ENSG00000240972	MIF	protein_coding	185.126	-2.0026	0.542806	-3.68934	0.000224835	0.00853978	Down Regulated in ART
ENSG00000138867	GUCD1	protein_coding	1981.85	0.606163	0.15347	3.94972	7.82414e-05	0.00401237	Up Regulated in ART
ENSG00000100219	XBP1	protein_coding	3143.1	0.568226	0.158181	3.59224	0.000327844	0.010959	Up Regulated in ART
ENSG00000100280	AP1B1	protein_coding	2462.17	-0.50578	0.166671	-3.03459	0.0024086	0.0420885	Down Regulated in ART
ENSG00000100325	ASCC2	protein_coding	1575.24	-0.309543	0.103193	-2.99966	0.0027028	0.0454966	Down Regulated in ART
ENSG00000100100	PIK3IP1	protein_coding	6351.45	0.870656	0.263475	3.30451	0.000951412	0.022679	Up Regulated in ART
ENSG00000100345	MYH9	protein_coding	21470.6	-0.579073	0.145759	-3.9728	7.10326e-05	0.00377719	Down Regulated in ART
ENSG00000100350	FOXRED2	protein_coding	66.4679	-1.07655	0.316405	-3.40244	0.000667864	0.0178118	Down Regulated in ART
ENSG00000100353	EIF3D	protein_coding	7155.99	0.541936	0.133011	4.07437	4.61393e-05	0.00278804	Up Regulated in ART
ENSG00000100385	IL2RB	protein_coding	6050.4	-0.975012	0.308897	-3.15643	0.00159714	0.0318873	Down Regulated in ART
ENSG00000198792	TMEM184B	protein_coding	489.364	-0.671104	0.18261	-3.67506	0.000237791	0.00888957	Down Regulated in ART
ENSG00000100216	TOMM22	protein_coding	1120.05	0.545084	0.124657	4.37267	1.22739e-05	0.00100055	Up Regulated in ART
ENSG00000100335	MIEF1	protein_coding	1071.34	0.568368	0.176759	3.2155	0.00130217	0.0279901	Up Regulated in ART
ENSG00000128272	ATF4	protein_coding	10708	0.653812	0.205595	3.18009	0.0014723	0.030183	Up Regulated in ART
ENSG00000239900	ADSL	protein_coding	73.4958	-0.823897	0.266742	-3.08874	0.00201007	0.0371928	Down Regulated in ART
ENSG00000100359	SGSM3	protein_coding	65.1972	-0.963899	0.278797	-3.45735	0.000545508	0.0153292	Down Regulated in ART
ENSG00000100387	RBX1	protein_coding	1184.72	0.641384	0.160384	3.99906	6.35939e-05	0.00352253	Up Regulated in ART
ENSG00000183864	TOB2	protein_coding	706.696	-0.73504	0.195396	-3.7618	0.000168696	0.00700818	Down Regulated in ART
ENSG00000100410	PHF5A	protein_coding	586.806	1.06389	0.22314	4.76783	1.86223e-06	0.000245672	Up Regulated in ART
ENSG00000196419	XRCC6	protein_coding	5701.09	0.286471	0.0873522	3.27949	0.00103994	0.0238358	Up Regulated in ART
ENSG00000100138	SNU13	protein_coding	1952.58	0.372788	0.108369	3.43999	0.000581732	0.0160087	Up Regulated in ART
ENSG00000184983	NDUFA6	protein_coding	1099.2	0.784096	0.157153	4.98937	6.05772e-07	0.000112569	Up Regulated in ART
ENSG00000100429	HDAC10	protein_coding	54.2138	-0.987819	0.302838	-3.26187	0.0011068	0.0246809	Down Regulated in ART
ENSG00000130489	SCO2	protein_coding	5.78483	-2.97921	0.885701	-3.36368	0.000769108	0.0196623	Down Regulated in ART
ENSG00000254413	CHKB-CPT1B	protein_coding	38.3531	-1.38336	0.455796	-3.03504	0.00240507	0.0420885	Down Regulated in ART
ENSG00000100288	CHKB	protein_coding	88.1951	-0.713659	0.218551	-3.26541	0.00109307	0.0245576	Down Regulated in ART
ENSG00000100299	ARSA	protein_coding	1115.05	-0.753582	0.248167	-3.03659	0.00239274	0.0419573	Down Regulated in ART
ENSG00000280433	FP565260.6	protein_coding	169.442	-1.08327	0.293294	-3.69345	0.000221236	0.00851537	Down Regulated in ART
ENSG00000154723	ATP5PF	protein_coding	1206.34	0.506345	0.141357	3.58202	0.000340953	0.0112235	Up Regulated in ART
ENSG00000142168	SOD1	protein_coding	2087.73	0.540676	0.166921	3.2391	0.00119906	0.0263641	Up Regulated in ART
ENSG00000160179	ABCG1	protein_coding	239.988	0.769287	0.226409	3.39778	0.00067935	0.0180346	Up Regulated in ART
ENSG00000184900	SUMO3	protein_coding	2009.59	0.537028	0.14021	3.83017	0.000128052	0.00561989	Up Regulated in ART
ENSG00000160299	PCNT	protein_coding	1292.39	-0.61575	0.163725	-3.76088	0.000169317	0.00701711	Down Regulated in ART
ENSG00000160305	DIP2A	protein_coding	2658.11	-1.0257	0.266545	-3.84814	0.00011902	0.00542717	Down Regulated in ART
ENSG00000198888	MT-ND1	protein_coding	111851	1.46282	0.287819	5.08243	3.72631e-07	8.02028e-05	Up Regulated in ART
ENSG00000198763	MT-ND2	protein_coding	119410	1.42986	0.271718	5.26229	1.42271e-07	3.78548e-05	Up Regulated in ART
ENSG00000198804	MT-CO1	protein_coding	345762	0.940634	0.250674	3.75243	0.00017513	0.0072062	Up Regulated in ART
ENSG00000198712	MT-CO2	protein_coding	159110	1.35988	0.254531	5.3427	9.1572e-08	2.7764e-05	Up Regulated in ART
ENSG00000198899	MT-ATP6	protein_coding	88341	0.89793	0.280633	3.19966	0.00137588	0.0292112	Up Regulated in ART
ENSG00000198938	MT-CO3	protein_coding	155005	1.36283	0.258988	5.26215	1.42377e-07	3.78548e-05	Up Regulated in ART
ENSG00000198840	MT-ND3	protein_coding	28035.9	1.85194	0.304441	6.08308	1.17899e-09	1.07238e-06	Up Regulated in ART
ENSG00000212907	MT-ND4L	protein_coding	28088.2	1.0796	0.230204	4.68974	2.73557e-06	0.000328306	Up Regulated in ART
ENSG00000198886	MT-ND4	protein_coding	199875	0.971764	0.255304	3.8063	0.000141063	0.00607942	Up Regulated in ART
ENSG00000198786	MT-ND5	protein_coding	120054	1.1231	0.25317	4.43617	9.15739e-06	0.000815763	Up Regulated in ART
ENSG00000198695	MT-ND6	protein_coding	1023.77	1.48	0.3563	4.1538	3.27006e-05	0.00213257	Up Regulated in ART
ENSG00000198727	MT-CYB	protein_coding	107122	1.03872	0.300133	3.46088	0.000538417	0.015229	Up Regulated in ART

## Sheet: HC_vs_ART
ID	GeneName	BioType	baseMean	log2FoldChange	lfcSE	stat	pvalue	padj	Significance
ENSG00000215915	ATAD3C	protein_coding	23.7301	-1.03374	0.292084	-3.53921	0.000401331	0.0160149	Down Regulated in ART
ENSG00000248333	CDK11B	protein_coding	1043.81	0.392735	0.0976358	4.02245	5.75959e-05	0.00478886	Up Regulated in ART
ENSG00000215790	SLC35E2A	protein_coding	887.381	-0.99832	0.300412	-3.32317	0.000890004	0.0261148	Down Regulated in ART
ENSG00000116254	CHD5	protein_coding	12.0293	1.55149	0.459274	3.37814	0.000729774	0.0233097	Up Regulated in ART
ENSG00000180758	GPR157	protein_coding	105.908	-0.497666	0.164615	-3.02322	0.00250104	0.0474101	Down Regulated in ART
ENSG00000173614	NMNAT1	protein_coding	196.767	-0.457894	0.136733	-3.34881	0.000811607	0.0247369	Down Regulated in ART
ENSG00000160049	DFFA	protein_coding	718.232	-0.321716	0.0907561	-3.54484	0.000392852	0.0160149	Down Regulated in ART
ENSG00000120948	TARDBP	protein_coding	1306.29	0.319652	0.0940612	3.39834	0.000677952	0.0223681	Up Regulated in ART
ENSG00000171824	EXOSC10	protein_coding	1511.64	0.273826	0.0734508	3.72802	0.000192988	0.0101551	Up Regulated in ART
ENSG00000132879	FBXO44	protein_coding	868.942	0.472	0.156646	3.01315	0.00258547	0.0482324	Up Regulated in ART
ENSG00000132881	CPLANE2	protein_coding	49.2403	-0.86681	0.180021	-4.81504	1.47168e-06	0.000479959	Down Regulated in ART
ENSG00000179051	RCC2	protein_coding	2356.11	0.258432	0.0833741	3.09967	0.00193736	0.0407084	Up Regulated in ART
ENSG00000173372	C1QA	protein_coding	218.135	1.18589	0.324007	3.66008	0.000252137	0.0120914	Up Regulated in ART
ENSG00000173369	C1QB	protein_coding	94.407	1.86075	0.389691	4.77495	1.79752e-06	0.000527435	Up Regulated in ART
ENSG00000007968	E2F2	protein_coding	260.844	0.583494	0.190759	3.0588	0.00222223	0.0437503	Up Regulated in ART
ENSG00000117748	RPA2	protein_coding	1763.81	-0.448323	0.121697	-3.68391	0.000229682	0.0114589	Down Regulated in ART
ENSG00000116350	SRSF4	protein_coding	1561.02	0.313287	0.0788218	3.97462	7.04907e-05	0.00529201	Up Regulated in ART
ENSG00000162510	MATN1	protein_coding	21.1672	1.03166	0.332839	3.09958	0.00193792	0.0407084	Up Regulated in ART
ENSG00000121774	KHDRBS1	protein_coding	3783.69	-0.214747	0.0576388	-3.72574	0.00019474	0.0101853	Down Regulated in ART
ENSG00000004455	AK2	protein_coding	3283.27	-0.327201	0.0729737	-4.48381	7.33203e-06	0.00125924	Down Regulated in ART
ENSG00000197056	ZMYM1	protein_coding	265.025	-0.681468	0.186177	-3.66032	0.000251903	0.0120914	Down Regulated in ART
ENSG00000163875	MEAF6	protein_coding	1577.52	-0.260151	0.0810159	-3.21111	0.00132221	0.0326535	Down Regulated in ART
ENSG00000163877	SNIP1	protein_coding	349.318	0.669071	0.204408	3.27321	0.00106332	0.0286731	Up Regulated in ART
ENSG00000116990	MYCL	protein_coding	770.797	-0.79963	0.229231	-3.48831	0.000486079	0.0182143	Down Regulated in ART
ENSG00000084073	ZMPSTE24	protein_coding	636.006	-0.521443	0.142447	-3.66062	0.000251608	0.0120914	Down Regulated in ART
ENSG00000243710	CFAP57	protein_coding	6.89844	1.86548	0.489746	3.80907	0.000139488	0.00841398	Up Regulated in ART
ENSG00000178922	HYI	protein_coding	197.254	0.601552	0.151165	3.97945	6.90752e-05	0.00524487	Up Regulated in ART
ENSG00000159214	CCDC24	protein_coding	54.8121	0.770132	0.203965	3.7758	0.000159498	0.00908298	Up Regulated in ART
ENSG00000178028	DMAP1	protein_coding	1411.38	0.357165	0.0906395	3.9405	8.13127e-05	0.0057223	Up Regulated in ART
ENSG00000126106	TMEM53	protein_coding	64.7994	-0.679331	0.200664	-3.38542	0.000710699	0.0229118	Down Regulated in ART
ENSG00000126107	HECTD3	protein_coding	1008.13	0.499921	0.0916897	5.45231	4.97199e-08	7.17293e-05	Up Regulated in ART
ENSG00000159588	CCDC17	protein_coding	71.9515	0.581529	0.190085	3.05931	0.0022185	0.0437433	Up Regulated in ART
ENSG00000085831	TTC39A	protein_coding	12.537	-1.73843	0.470363	-3.69593	0.000219082	0.0110254	Down Regulated in ART
ENSG00000134717	BTF3L4	protein_coding	1199.37	-0.339185	0.0876377	-3.87031	0.000108695	0.00699529	Down Regulated in ART
ENSG00000121310	ECHDC2	protein_coding	871.436	0.518365	0.134242	3.86144	0.000112722	0.00720088	Up Regulated in ART
ENSG00000172456	FGGY	protein_coding	95.4642	0.551923	0.136169	4.05322	5.05175e-05	0.00441697	Up Regulated in ART
ENSG00000142864	SERBP1	protein_coding	3867.86	-0.293395	0.0759324	-3.86389	0.000111593	0.00715519	Down Regulated in ART
ENSG00000117054	ACADM	protein_coding	798.994	-0.382898	0.124057	-3.08646	0.00202552	0.041498	Down Regulated in ART
ENSG00000137955	RABGGTB	protein_coding	1802.27	0.339132	0.108377	3.12918	0.00175292	0.0381238	Up Regulated in ART
ENSG00000184005	ST6GALNAC3	protein_coding	67.4773	-0.876806	0.272323	-3.21973	0.00128311	0.031992	Down Regulated in ART
ENSG00000137965	IFI44	protein_coding	1235.17	1.12793	0.364895	3.09112	0.00199406	0.0411002	Up Regulated in ART
ENSG00000153898	MCOLN2	protein_coding	262.067	0.641681	0.191905	3.34374	0.000826563	0.0250603	Up Regulated in ART
ENSG00000153936	HS2ST1	protein_coding	477.949	-0.4613	0.152306	-3.02877	0.0024555	0.0468684	Down Regulated in ART
ENSG00000137944	KYAT3	protein_coding	638.361	-0.353993	0.0970221	-3.64858	0.000263694	0.0124389	Down Regulated in ART
ENSG00000162645	GBP2	protein_coding	5872.54	0.34425	0.106329	3.23757	0.0012055	0.0308267	Up Regulated in ART
ENSG00000171492	LRRC8D	protein_coding	1349.21	-0.356235	0.115779	-3.07684	0.00209207	0.0422815	Down Regulated in ART
ENSG00000162627	SNX7	protein_coding	10.5615	2.11648	0.631668	3.35062	0.000806307	0.0246622	Up Regulated in ART
ENSG00000085491	SLC25A24	protein_coding	912.669	-0.663463	0.156345	-4.24357	2.19987e-05	0.00248916	Down Regulated in ART
ENSG00000116266	STXBP3	protein_coding	1286	-0.368782	0.12222	-3.01736	0.00254989	0.0478263	Down Regulated in ART
ENSG00000168710	AHCYL1	protein_coding	1681.21	-0.342773	0.104227	-3.28871	0.00100647	0.0279355	Down Regulated in ART
ENSG00000143093	STRIP1	protein_coding	1334.8	0.251811	0.06889	3.65527	0.000256915	0.0122808	Up Regulated in ART
ENSG00000121931	LRIF1	protein_coding	284.409	-0.862684	0.194294	-4.44009	8.99217e-06	0.00145488	Down Regulated in ART
ENSG00000173947	PIFO	protein_coding	6.16706	-1.71266	0.431202	-3.97182	7.13259e-05	0.00532239	Down Regulated in ART
ENSG00000116473	RAP1A	protein_coding	3898.57	-0.236178	0.076772	-3.07635	0.00209551	0.0422815	Down Regulated in ART
ENSG00000155363	MOV10	protein_coding	1371.18	0.578244	0.137278	4.21222	2.52874e-05	0.00273609	Up Regulated in ART
ENSG00000134262	AP4B1	protein_coding	1119.67	0.414048	0.0937067	4.41855	9.93663e-06	0.00153645	Up Regulated in ART
ENSG00000155761	SPAG17	protein_coding	7.9654	-1.49445	0.45986	-3.24979	0.0011549	0.0302018	Down Regulated in ART
ENSG00000265808	SEC22B	protein_coding	1047	-0.42743	0.129803	-3.2929	0.000991587	0.0277773	Down Regulated in ART
ENSG00000143127	ITGA10	protein_coding	78.3534	0.550051	0.147252	3.73545	0.000187383	0.00991769	Up Regulated in ART
ENSG00000117360	PRPF3	protein_coding	1851.71	0.297274	0.0820245	3.62421	0.000289843	0.0133097	Up Regulated in ART
ENSG00000163125	RPRD2	protein_coding	1912.91	-0.31685	0.094088	-3.36759	0.000758282	0.0237815	Down Regulated in ART
ENSG00000143457	GOLPH3L	protein_coding	273.736	-0.514389	0.142582	-3.60767	0.00030896	0.0140019	Down Regulated in ART
ENSG00000143416	SELENBP1	protein_coding	57.4944	3.70907	0.872615	4.25053	2.13268e-05	0.00246139	Up Regulated in ART
ENSG00000159377	PSMB4	protein_coding	5305.18	0.301961	0.100744	2.99729	0.00272387	0.0497853	Up Regulated in ART
ENSG00000143436	MRPL9	protein_coding	1179.77	0.354612	0.0850172	4.17107	3.03176e-05	0.00310567	Up Regulated in ART
ENSG00000213171	LINGO4	protein_coding	3.86091	-2.27833	0.741701	-3.07177	0.00212797	0.0427704	Down Regulated in ART
ENSG00000196407	THEM5	protein_coding	15.5429	1.18362	0.340686	3.47423	0.000512321	0.0188308	Up Regulated in ART
ENSG00000198837	DENND4B	protein_coding	5192.23	0.328155	0.100664	3.25989	0.00111456	0.0294134	Up Regulated in ART
ENSG00000160741	CRTC2	protein_coding	2879.82	0.367325	0.078225	4.69575	2.65635e-06	0.00068637	Up Regulated in ART
ENSG00000285641	AL358472.6	protein_coding	4.80242	-1.7537	0.544359	-3.22159	0.00127482	0.031906	Down Regulated in ART
ENSG00000160712	IL6R	protein_coding	3389.64	-0.462203	0.135344	-3.41502	0.000637771	0.0217008	Down Regulated in ART
ENSG00000163463	KRTCAP2	protein_coding	72.8134	0.678952	0.169169	4.01346	5.98361e-05	0.00483707	Up Regulated in ART
ENSG00000132680	KHDC4	protein_coding	729.125	0.589822	0.136104	4.3336	1.46689e-05	0.00191169	Up Regulated in ART
ENSG00000160781	PAQR6	protein_coding	75.498	0.704978	0.200336	3.51898	0.000433214	0.017045	Up Regulated in ART
ENSG00000163563	MNDA	protein_coding	7610.28	-0.91135	0.285507	-3.19204	0.00141272	0.0342055	Down Regulated in ART
ENSG00000213085	CFAP45	protein_coding	43.5345	1.29664	0.270414	4.79503	1.62653e-06	0.00050283	Up Regulated in ART
ENSG00000132716	DCAF8	protein_coding	1685.48	0.337865	0.0863493	3.91278	9.12405e-05	0.0062433	Up Regulated in ART
ENSG00000158773	USF1	protein_coding	3409.53	0.543332	0.126593	4.29197	1.77096e-05	0.00215908	Up Regulated in ART
ENSG00000158796	DEDD	protein_coding	1234.38	0.282361	0.073712	3.8306	0.000127833	0.0078122	Up Regulated in ART
ENSG00000143224	PPOX	protein_coding	597.658	0.515483	0.124681	4.13442	3.55851e-05	0.00352028	Up Regulated in ART
ENSG00000158850	B4GALT3	protein_coding	1405.51	0.318119	0.0981882	3.23989	0.00119574	0.0307215	Up Regulated in ART
ENSG00000158882	TOMM40L	protein_coding	500.131	0.438967	0.137322	3.19663	0.00139043	0.0337604	Up Regulated in ART
ENSG00000118217	ATF6	protein_coding	1795.45	-0.265241	0.0811579	-3.26821	0.0010823	0.0288596	Down Regulated in ART
ENSG00000143183	TMCO1	protein_coding	1417.27	-0.301914	0.100622	-3.00047	0.00269562	0.049444	Down Regulated in ART
ENSG00000143155	TIPRL	protein_coding	780.525	-0.334316	0.080786	-4.1383	3.49895e-05	0.00348125	Down Regulated in ART
ENSG00000000460	C1orf112	protein_coding	227.401	0.321453	0.103335	3.11079	0.00186589	0.0397323	Up Regulated in ART
ENSG00000117533	VAMP4	protein_coding	899.069	-0.329137	0.109427	-3.00782	0.0026313	0.0486678	Down Regulated in ART
ENSG00000162704	ARPC5	protein_coding	5581.65	-0.4265	0.139628	-3.05454	0.00225403	0.0441422	Down Regulated in ART
ENSG00000121481	RNF2	protein_coding	435.514	-0.448938	0.114463	-3.92211	8.77756e-05	0.00610776	Down Regulated in ART
ENSG00000127074	RGS13	protein_coding	5.49256	2.35319	0.673078	3.49616	0.000472008	0.0179446	Up Regulated in ART
ENSG00000151414	NEK7	protein_coding	1368.23	-0.531593	0.156924	-3.38759	0.000705091	0.0229055	Down Regulated in ART
ENSG00000117697	NSL1	protein_coding	772.259	-0.426244	0.0905692	-4.70628	2.52273e-06	0.000661719	Down Regulated in ART
ENSG00000136628	EPRS	protein_coding	2643.37	-0.370891	0.0945688	-3.92191	8.78485e-05	0.00610776	Down Regulated in ART
ENSG00000162813	BPNT1	protein_coding	449.505	-0.579817	0.165327	-3.5071	0.000453022	0.0176241	Down Regulated in ART
ENSG00000186063	AIDA	protein_coding	1270.02	-0.417464	0.134967	-3.09308	0.00198093	0.0410417	Down Regulated in ART
ENSG00000143753	DEGS1	protein_coding	1513.78	-0.272086	0.0801806	-3.39341	0.00069028	0.0226328	Down Regulated in ART
ENSG00000143742	SRP9	protein_coding	2555.61	-0.361537	0.114766	-3.1502	0.00163157	0.0367168	Down Regulated in ART
ENSG00000154370	TRIM11	protein_coding	907.497	0.535163	0.133373	4.01253	6.00722e-05	0.00483707	Up Regulated in ART
ENSG00000135776	ABCB10	protein_coding	777.715	-0.304414	0.097963	-3.10744	0.00188717	0.0399886	Down Regulated in ART
ENSG00000143633	C1orf131	protein_coding	302.69	0.333491	0.111148	3.00042	0.00269612	0.049444	Up Regulated in ART
ENSG00000135766	EGLN1	protein_coding	1155.22	-0.410811	0.123852	-3.31696	0.000910036	0.0262776	Down Regulated in ART
ENSG00000116918	TSNAX	protein_coding	624.667	-0.566363	0.147816	-3.83153	0.000127347	0.0078122	Down Regulated in ART
ENSG00000182901	RGS7	protein_coding	7.49859	-1.75292	0.444705	-3.94175	8.08889e-05	0.0057223	Down Regulated in ART
ENSG00000035687	ADSS	protein_coding	1357.73	-0.369549	0.109061	-3.38846	0.000702864	0.0229055	Down Regulated in ART
ENSG00000183891	TTC32	protein_coding	456.471	0.318978	0.0923673	3.45336	0.000553641	0.0198026	Up Regulated in ART
ENSG00000084733	RAB10	protein_coding	2175.46	-0.733867	0.179554	-4.08717	4.36675e-05	0.00400041	Down Regulated in ART
ENSG00000173567	ADGRF3	protein_coding	18.2749	0.89847	0.290061	3.09752	0.00195146	0.0407523	Up Regulated in ART
ENSG00000115163	CENPA	protein_coding	11.2713	1.5296	0.498226	3.0701	0.0021399	0.0427783	Up Regulated in ART
ENSG00000138080	EMILIN1	protein_coding	17.2262	-1.18583	0.365882	-3.24101	0.00119107	0.0307215	Down Regulated in ART
ENSG00000115207	GTF3C2	protein_coding	1697.83	0.245603	0.07078	3.46995	0.000520555	0.0190123	Up Regulated in ART
ENSG00000115211	EIF2B4	protein_coding	851.435	0.369773	0.0974483	3.79456	0.000147907	0.00873915	Up Regulated in ART
ENSG00000115216	NRBP1	protein_coding	3307.39	0.261145	0.0785631	3.32402	0.00088731	0.0261148	Up Regulated in ART
ENSG00000021574	SPAST	protein_coding	717.582	-0.615665	0.134895	-4.56402	5.01822e-06	0.00101018	Down Regulated in ART
ENSG00000091106	NLRC4	protein_coding	536.379	-0.93557	0.230769	-4.05415	5.03171e-05	0.00441697	Down Regulated in ART
ENSG00000171055	FEZ2	protein_coding	436.561	-0.460835	0.127599	-3.61159	0.000304324	0.013828	Down Regulated in ART
ENSG00000152133	GPATCH11	protein_coding	530.543	-0.639244	0.141571	-4.51536	6.32095e-06	0.00114745	Down Regulated in ART
ENSG00000143889	HNRNPLL	protein_coding	814.522	-0.321965	0.0969793	-3.31994	0.000900383	0.0262776	Down Regulated in ART
ENSG00000138050	THUMPD2	protein_coding	249.863	0.37085	0.123512	3.00254	0.00267738	0.049257	Up Regulated in ART
ENSG00000138095	LRPPRC	protein_coding	2119.37	-0.350831	0.113161	-3.10028	0.00193336	0.0407084	Down Regulated in ART
ENSG00000138078	PREPL	protein_coding	464.769	-0.700511	0.179953	-3.89274	9.9118e-05	0.00667678	Down Regulated in ART
ENSG00000068784	SRBD1	protein_coding	644.965	-0.356647	0.0908034	-3.92768	8.57689e-05	0.00601146	Down Regulated in ART
ENSG00000275052	PPP4R3B	protein_coding	2149.41	-0.412406	0.127786	-3.22732	0.00124957	0.0315133	Down Regulated in ART
ENSG00000119844	AFTPH	protein_coding	2151.39	-0.361059	0.115837	-3.11695	0.0018273	0.0393951	Down Regulated in ART
ENSG00000138071	ACTR2	protein_coding	12189.7	-0.595233	0.14801	-4.02156	5.78138e-05	0.00478886	Down Regulated in ART
ENSG00000087338	GMCL1	protein_coding	610.431	-0.560024	0.165932	-3.37501	0.000738134	0.0234469	Down Regulated in ART
ENSG00000035141	FAM136A	protein_coding	952.364	0.233549	0.0667404	3.49936	0.000466381	0.0179446	Up Regulated in ART
ENSG00000163235	TGFA	protein_coding	121.692	-0.845893	0.224599	-3.76623	0.00016573	0.00931532	Down Regulated in ART
ENSG00000239779	WBP1	protein_coding	280.239	0.507213	0.13023	3.89474	9.83032e-05	0.00664776	Up Regulated in ART
ENSG00000115307	AUP1	protein_coding	4605.1	0.314207	0.101398	3.09875	0.00194341	0.0407084	Up Regulated in ART
ENSG00000115459	ELMOD3	protein_coding	797.397	0.385752	0.090535	4.26081	2.03688e-05	0.00241621	Up Regulated in ART
ENSG00000132300	PTCD3	protein_coding	2060.71	0.278904	0.087722	3.17941	0.00147577	0.0349117	Up Regulated in ART
ENSG00000115561	CHMP3	protein_coding	1330.6	-0.26927	0.0712808	-3.7776	0.000158347	0.00904722	Down Regulated in ART
ENSG00000239305	RNF103	protein_coding	623.028	0.486298	0.148812	3.26788	0.00108357	0.0288596	Up Regulated in ART
ENSG00000172086	KRCC1	protein_coding	731.15	-0.488167	0.143655	-3.39819	0.000678329	0.0223681	Down Regulated in ART
ENSG00000172071	EIF2AK3	protein_coding	865.05	0.499556	0.148102	3.37306	0.000743382	0.0235704	Up Regulated in ART
ENSG00000183513	COA5	protein_coding	629.497	0.270336	0.0850007	3.1804	0.00147072	0.0348782	Up Regulated in ART
ENSG00000196872	KIAA1211L	protein_coding	10.9928	-1.13182	0.356391	-3.17579	0.00149431	0.0350534	Down Regulated in ART
ENSG00000185414	MRPL30	protein_coding	435.122	-0.458443	0.124538	-3.68114	0.000232191	0.0115177	Down Regulated in ART
ENSG00000144214	LYG1	protein_coding	48.5595	0.756514	0.198878	3.80391	0.000142427	0.00853183	Up Regulated in ART
ENSG00000170417	TMEM182	protein_coding	76.164	-0.728795	0.139872	-5.21044	1.88393e-07	0.000181192	Down Regulated in ART
ENSG00000186522	SEPT10	protein_coding	100.546	-0.769844	0.234912	-3.27716	0.00104858	0.0285874	Down Regulated in ART
ENSG00000115091	ACTR3	protein_coding	7112.4	-0.531361	0.123175	-4.31388	1.60414e-05	0.00201238	Down Regulated in ART
ENSG00000125633	CCDC93	protein_coding	1620.75	0.263746	0.0795098	3.31714	0.000909425	0.0262776	Up Regulated in ART
ENSG00000115112	TFCP2L1	protein_coding	63.6604	1.63405	0.521644	3.1325	0.00173327	0.0379348	Up Regulated in ART
ENSG00000163161	ERCC3	protein_coding	1898.67	0.284933	0.0893654	3.18841	0.00143059	0.0343209	Up Regulated in ART
ENSG00000135999	EPC2	protein_coding	1902.26	-0.35279	0.10677	-3.3042	0.00095249	0.0269877	Down Regulated in ART
ENSG00000123610	TNFAIP6	protein_coding	23.8922	-1.76661	0.457923	-3.85787	0.000114378	0.00725316	Down Regulated in ART
ENSG00000115145	STAM2	protein_coding	453.061	-0.421112	0.131489	-3.20263	0.00136179	0.0332961	Down Regulated in ART
ENSG00000177917	ARL6IP6	protein_coding	407.371	-0.403407	0.0910161	-4.43226	9.32487e-06	0.00149474	Down Regulated in ART
ENSG00000136541	ERMN	protein_coding	140.784	0.892131	0.197243	4.52301	6.09673e-06	0.00114745	Up Regulated in ART
ENSG00000144283	PKP4	protein_coding	462.347	-0.325161	0.103663	-3.13671	0.00170853	0.0377026	Down Regulated in ART
ENSG00000136536	MARCH7	protein_coding	2333	-0.475623	0.132508	-3.5894	0.000331446	0.0147128	Down Regulated in ART
ENSG00000241399	CD302	protein_coding	2456.6	-0.835506	0.22556	-3.70414	0.000212108	0.0108031	Down Regulated in ART
ENSG00000115827	DCAF17	protein_coding	591.001	-0.491797	0.154147	-3.19044	0.00142057	0.0342707	Down Regulated in ART
ENSG00000077380	DYNC1I2	protein_coding	1371.99	-0.378209	0.111291	-3.39837	0.000677895	0.0223681	Down Regulated in ART
ENSG00000138433	CIR1	protein_coding	1283.99	0.343106	0.106761	3.21378	0.00131	0.0323981	Up Regulated in ART
ENSG00000064012	CASP8	protein_coding	3375.97	0.404678	0.131574	3.07566	0.00210037	0.042286	Up Regulated in ART
ENSG00000197713	RPE	protein_coding	357.216	-0.44643	0.130664	-3.41661	0.000634053	0.0216536	Down Regulated in ART
ENSG00000115414	FN1	protein_coding	40.3332	2.65425	0.785126	3.38067	0.000723094	0.0231818	Up Regulated in ART
ENSG00000079246	XRCC5	protein_coding	7565.17	-0.352357	0.0985322	-3.57606	0.000348809	0.0150894	Down Regulated in ART
ENSG00000079308	TNS1	protein_coding	181.444	1.20665	0.33258	3.62815	0.000285457	0.0132008	Up Regulated in ART
ENSG00000188282	RUFY4	protein_coding	142.243	1.05774	0.335662	3.15119	0.00162606	0.0366542	Up Regulated in ART
ENSG00000180871	CXCR2	protein_coding	157.421	-1.2833	0.278889	-4.60147	4.19516e-06	0.000886908	Down Regulated in ART
ENSG00000123992	DNPEP	protein_coding	1302.59	0.517951	0.119772	4.32446	1.52904e-05	0.00195547	Up Regulated in ART
ENSG00000135932	CAB39	protein_coding	3326.25	-0.345426	0.106821	-3.23368	0.00122207	0.0311878	Down Regulated in ART
ENSG00000132330	SCLY	protein_coding	42.5126	0.650797	0.204997	3.17466	0.00150011	0.0351419	Up Regulated in ART
ENSG00000132323	ILKAP	protein_coding	806.493	0.309989	0.070706	4.3842	1.16411e-05	0.00173734	Up Regulated in ART
ENSG00000156983	BRPF1	protein_coding	1539.65	0.583684	0.154172	3.78593	0.000153134	0.0088664	Up Regulated in ART
ENSG00000214021	TTLL3	protein_coding	732.453	0.484214	0.132605	3.65155	0.00026066	0.0123631	Up Regulated in ART
ENSG00000132155	RAF1	protein_coding	3774.06	0.220534	0.0732935	3.00892	0.00262177	0.0485435	Up Regulated in ART
ENSG00000088726	TMEM40	protein_coding	349.588	0.953268	0.313318	3.04249	0.00234627	0.0452827	Up Regulated in ART
ENSG00000144711	IQSEC1	protein_coding	4308.52	0.465316	0.113864	4.08659	4.37759e-05	0.00400041	Up Regulated in ART
ENSG00000206562	METTL6	protein_coding	194.308	-0.504648	0.14251	-3.54113	0.000398424	0.0160149	Down Regulated in ART
ENSG00000172939	OXSR1	protein_coding	1887.73	-0.231817	0.0677219	-3.42307	0.000619191	0.0213961	Down Regulated in ART
ENSG00000157036	EXOG	protein_coding	266.748	0.380094	0.126735	2.99911	0.00270769	0.0496037	Up Regulated in ART
ENSG00000179152	TCAIM	protein_coding	414.525	-0.547931	0.0965237	-5.67665	1.37355e-08	3.17867e-05	Down Regulated in ART
ENSG00000196345	ZKSCAN7	protein_coding	73.5495	-0.771857	0.218075	-3.53942	0.000401013	0.0160149	Down Regulated in ART
ENSG00000186448	ZNF197	protein_coding	446.249	-0.434783	0.125972	-3.45141	0.000557659	0.0198646	Down Regulated in ART
ENSG00000249992	TMEM158	protein_coding	52.3415	1.36062	0.411661	3.3052	0.000949091	0.0269355	Up Regulated in ART
ENSG00000163818	LZTFL1	protein_coding	309.061	-0.376328	0.120234	-3.12996	0.00174831	0.0380714	Down Regulated in ART
ENSG00000160796	NBEAL2	protein_coding	7332.14	0.448218	0.141402	3.16982	0.00152533	0.0355405	Up Regulated in ART
ENSG00000198218	QRICH1	protein_coding	3082.72	0.386593	0.0920111	4.2016	2.65039e-05	0.00284991	Up Regulated in ART
ENSG00000182179	UBA7	protein_coding	5526.91	0.376441	0.122363	3.07642	0.00209502	0.0422815	Up Regulated in ART
ENSG00000003756	RBM5	protein_coding	3714.77	0.317457	0.0819715	3.87277	0.000107606	0.00699143	Up Regulated in ART
ENSG00000145041	DCAF1	protein_coding	1072.14	0.437239	0.0716377	6.10347	1.03791e-09	5.98945e-06	Up Regulated in ART
ENSG00000114904	NEK4	protein_coding	573.191	-0.347698	0.098008	-3.54765	0.000388681	0.0159531	Down Regulated in ART
ENSG00000243696	AC006254.1	protein_coding	81.9201	0.794738	0.169602	4.68591	2.78719e-06	0.000699302	Up Regulated in ART
ENSG00000248592	TMEM110-MUSTN1	protein_coding	52.0198	0.816794	0.22507	3.62906	0.000284451	0.0132008	Up Regulated in ART
ENSG00000163933	RFT1	protein_coding	540.728	-0.297218	0.0937941	-3.16884	0.00153048	0.0355711	Down Regulated in ART
ENSG00000157445	CACNA2D3	protein_coding	246.91	-0.688258	0.226547	-3.03804	0.00238126	0.0457256	Down Regulated in ART
ENSG00000163636	PSMD6	protein_coding	1631.33	0.22854	0.0660635	3.4594	0.000541377	0.0195257	Up Regulated in ART
ENSG00000172340	SUCLG2	protein_coding	1539.51	-0.329588	0.100688	-3.27338	0.0010627	0.0286731	Down Regulated in ART
ENSG00000144744	UBA3	protein_coding	1858.36	-0.249293	0.0768068	-3.24572	0.00117155	0.0304991	Down Regulated in ART
ENSG00000114480	GBE1	protein_coding	334.261	-0.425053	0.122132	-3.48027	0.000500906	0.0184882	Down Regulated in ART
ENSG00000175105	ZNF654	protein_coding	610.134	-0.485536	0.136799	-3.54926	0.000386316	0.0159531	Down Regulated in ART
ENSG00000170854	RIOX2	protein_coding	557.513	-0.367034	0.110876	-3.31033	0.000931865	0.0267536	Down Regulated in ART
ENSG00000080819	CPOX	protein_coding	296.957	-0.483087	0.131175	-3.68278	0.000230705	0.0114769	Down Regulated in ART
ENSG00000144820	ADGRG7	protein_coding	4.38622	23.6692	4.1428	5.71335	1.10775e-08	3.17867e-05	Up Regulated in ART
ENSG00000138459	SLC35A5	protein_coding	521.869	-0.562602	0.15145	-3.71477	0.000203389	0.0104794	Down Regulated in ART
ENSG00000163606	CD200R1	protein_coding	239.566	-1.20808	0.247062	-4.88978	1.00949e-06	0.00039719	Down Regulated in ART
ENSG00000163607	GTPBP8	protein_coding	245.245	-0.31298	0.094115	-3.32551	0.000882573	0.0260333	Down Regulated in ART
ENSG00000121578	B4GALT4	protein_coding	462.656	0.424628	0.0958691	4.42924	9.45648e-06	0.00149968	Up Regulated in ART
ENSG00000176142	TMEM39A	protein_coding	511.957	0.353837	0.111134	3.18388	0.00145317	0.0345568	Up Regulated in ART
ENSG00000113924	HGD	protein_coding	129.916	0.927101	0.267875	3.46095	0.000538273	0.0195257	Up Regulated in ART
ENSG00000138496	PARP9	protein_coding	2151.25	0.577993	0.178415	3.23961	0.00119694	0.0307215	Up Regulated in ART
ENSG00000206527	HACD2	protein_coding	1070.6	-0.377736	0.115994	-3.25651	0.0011279	0.0296301	Down Regulated in ART
ENSG00000114520	SNX4	protein_coding	562.59	-0.34923	0.0932356	-3.74567	0.000179912	0.00973322	Down Regulated in ART
ENSG00000144909	OSBPL11	protein_coding	1370.43	-0.382179	0.126448	-3.02242	0.00250759	0.0474442	Down Regulated in ART
ENSG00000114686	MRPL3	protein_coding	1045.5	-0.233458	0.0655983	-3.5589	0.000372413	0.0156107	Down Regulated in ART
ENSG00000174564	IL20RB	protein_coding	27.2917	0.861496	0.213838	4.02873	5.60791e-05	0.00471282	Up Regulated in ART
ENSG00000144935	TRPC1	protein_coding	61.7512	-0.607357	0.200492	-3.02934	0.00245089	0.046832	Down Regulated in ART
ENSG00000082996	RNF13	protein_coding	2017.78	-0.407255	0.116883	-3.48431	0.000493415	0.0183492	Down Regulated in ART
ENSG00000168827	GFM1	protein_coding	791.786	-0.374943	0.101043	-3.71073	0.000206665	0.0106165	Down Regulated in ART
ENSG00000168811	IL12A	protein_coding	48.316	0.821486	0.26433	3.10781	0.00188481	0.0399875	Up Regulated in ART
ENSG00000186432	KPNA4	protein_coding	1974.46	-0.307095	0.0973009	-3.15613	0.00159875	0.0362222	Down Regulated in ART
ENSG00000114209	PDCD10	protein_coding	1114.07	-0.286147	0.0830691	-3.44468	0.000571726	0.0202407	Down Regulated in ART
ENSG00000173890	GPR160	protein_coding	335.881	-0.6405	0.185093	-3.46043	0.000539317	0.0195257	Down Regulated in ART
ENSG00000163558	PRKCI	protein_coding	417.728	-0.577031	0.150453	-3.83529	0.000125414	0.00775415	Down Regulated in ART
ENSG00000144959	NCEH1	protein_coding	376.481	-0.623427	0.162322	-3.84069	0.000122691	0.00766189	Down Regulated in ART
ENSG00000171121	KCNMB3	protein_coding	23.4688	0.853193	0.233006	3.66168	0.000250563	0.0120914	Up Regulated in ART
ENSG00000136521	NDUFB5	protein_coding	1203.67	-0.321788	0.0804288	-4.00091	6.31005e-05	0.00496543	Down Regulated in ART
ENSG00000145191	EIF2B5	protein_coding	1834.84	0.332294	0.0758567	4.38055	1.1838e-05	0.00175162	Up Regulated in ART
ENSG00000161204	ABCF3	protein_coding	1257.41	0.349457	0.0953564	3.66475	0.000247579	0.0120914	Up Regulated in ART
ENSG00000073803	MAP3K13	protein_coding	280.206	-0.317755	0.101628	-3.12666	0.00176802	0.038404	Down Regulated in ART
ENSG00000213139	CRYGS	protein_coding	60.124	0.593831	0.177714	3.3415	0.000833281	0.0252199	Up Regulated in ART
ENSG00000113838	TBCCD1	protein_coding	393.479	-0.408472	0.0951224	-4.29417	1.75346e-05	0.0021529	Down Regulated in ART
ENSG00000161217	PCYT1A	protein_coding	1507.71	0.219583	0.070868	3.09848	0.00194519	0.0407084	Up Regulated in ART
ENSG00000215375	MYL5	protein_coding	171.143	0.433362	0.142584	3.03935	0.00237091	0.0456057	Up Regulated in ART
ENSG00000132406	TMEM128	protein_coding	382.81	-0.438605	0.104492	-4.19751	2.69864e-05	0.00288388	Down Regulated in ART
ENSG00000007062	PROM1	protein_coding	8.23055	1.50151	0.458382	3.27568	0.00105409	0.0286731	Up Regulated in ART
ENSG00000109819	PPARGC1A	protein_coding	13.1559	-1.94375	0.630508	-3.08284	0.00205038	0.0419081	Down Regulated in ART
ENSG00000169299	PGM2	protein_coding	744.778	-0.419112	0.129619	-3.23341	0.00122323	0.0311878	Down Regulated in ART
ENSG00000157796	WDR19	protein_coding	379.636	0.504518	0.123844	4.07381	4.62499e-05	0.0041702	Up Regulated in ART
ENSG00000109814	UGDH	protein_coding	208.767	-0.954042	0.18586	-5.13311	2.84997e-07	0.000210416	Down Regulated in ART
ENSG00000163683	SMIM14	protein_coding	1077.08	-0.645206	0.160571	-4.0182	5.86442e-05	0.00482299	Down Regulated in ART
ENSG00000169019	COMMD8	protein_coding	532.486	-0.520193	0.11715	-4.44039	8.97976e-06	0.00145488	Down Regulated in ART
ENSG00000109171	SLAIN2	protein_coding	1582.6	-0.33752	0.0939334	-3.59318	0.000326668	0.0145755	Down Regulated in ART
ENSG00000109180	OCIAD1	protein_coding	2423.39	-0.287126	0.0848016	-3.38586	0.000709557	0.0229118	Down Regulated in ART
ENSG00000134853	PDGFRA	protein_coding	4.66031	1.79574	0.534608	3.35898	0.000782294	0.0241841	Up Regulated in ART
ENSG00000128039	SRD5A3	protein_coding	211.897	-0.81296	0.176685	-4.60119	4.20093e-06	0.000886908	Down Regulated in ART
ENSG00000173597	SULT1B1	protein_coding	637.547	-0.686999	0.193186	-3.55616	0.000376319	0.0157363	Down Regulated in ART
ENSG00000132465	JCHAIN	protein_coding	5862.83	1.54021	0.458645	3.35817	0.000784602	0.0242122	Up Regulated in ART
ENSG00000156136	DCK	protein_coding	1378.78	-0.422539	0.137191	-3.07993	0.00207048	0.0422691	Down Regulated in ART
ENSG00000138669	PRKG2	protein_coding	41.3512	-1.36672	0.392716	-3.48017	0.000501092	0.0184882	Down Regulated in ART
ENSG00000189308	LIN54	protein_coding	403.237	-0.464093	0.135401	-3.42753	0.000609089	0.0211314	Down Regulated in ART
ENSG00000163322	ABRAXAS1	protein_coding	699.529	-0.610546	0.127842	-4.7758	1.78992e-06	0.000527435	Down Regulated in ART
ENSG00000138678	GPAT3	protein_coding	424.099	-0.651213	0.202364	-3.21803	0.00129076	0.0320187	Down Regulated in ART
ENSG00000145332	KLHL8	protein_coding	546.356	-0.549825	0.107566	-5.11151	3.19593e-07	0.000211212	Down Regulated in ART
ENSG00000170502	NUDT9	protein_coding	375.791	-0.335344	0.0962747	-3.4832	0.000495457	0.0183669	Down Regulated in ART
ENSG00000138821	SLC39A8	protein_coding	519.928	-0.450604	0.133685	-3.37065	0.000749905	0.0236804	Down Regulated in ART
ENSG00000138785	INTS12	protein_coding	585.354	0.361981	0.110755	3.26832	0.00108189	0.0288596	Up Regulated in ART
ENSG00000174749	FAM241A	protein_coding	269.531	-0.540932	0.163114	-3.31628	0.000912247	0.0262776	Down Regulated in ART
ENSG00000138660	AP1AR	protein_coding	378.874	-0.664214	0.153214	-4.33521	1.45624e-05	0.00191169	Down Regulated in ART
ENSG00000145390	USP53	protein_coding	554.421	-0.977755	0.273613	-3.5735	0.000352244	0.0150942	Down Regulated in ART
ENSG00000164112	TMEM155	protein_coding	11.1051	1.81093	0.60111	3.01264	0.00258983	0.0482617	Up Regulated in ART
ENSG00000138686	BBS7	protein_coding	176.262	-0.360384	0.118251	-3.04761	0.00230668	0.0447181	Down Regulated in ART
ENSG00000109471	IL2	protein_coding	3.10789	-1.98076	0.650411	-3.04539	0.00232376	0.0449989	Down Regulated in ART
ENSG00000172007	RAB33B	protein_coding	349.295	-0.447156	0.123179	-3.63013	0.000283274	0.0131829	Down Regulated in ART
ENSG00000151611	MMAA	protein_coding	183.312	0.288319	0.0937431	3.07562	0.00210062	0.042286	Up Regulated in ART
ENSG00000164168	TMEM184C	protein_coding	419.349	-0.571776	0.131287	-4.35515	1.32973e-05	0.00185647	Down Regulated in ART
ENSG00000164144	ARFIP1	protein_coding	441.237	-0.48177	0.150675	-3.19742	0.00138665	0.0337158	Down Regulated in ART
ENSG00000145428	RNF175	protein_coding	35.1188	1.15828	0.325231	3.56139	0.0003689	0.0155646	Up Regulated in ART
ENSG00000256043	CTSO	protein_coding	986.929	-0.525554	0.143803	-3.65468	0.000257504	0.0122808	Down Regulated in ART
ENSG00000171503	ETFDH	protein_coding	317.451	-0.490576	0.130583	-3.7568	0.000172098	0.00947618	Down Regulated in ART
ENSG00000198498	TMA16	protein_coding	234.742	-0.322053	0.10289	-3.13007	0.00174765	0.0380714	Down Regulated in ART
ENSG00000170088	TMEM192	protein_coding	457.689	-0.329266	0.107218	-3.07101	0.00213336	0.0427704	Down Regulated in ART
ENSG00000129116	PALLD	protein_coding	225.349	-0.758329	0.230663	-3.2876	0.00101045	0.0279887	Down Regulated in ART
ENSG00000151718	WWC2	protein_coding	193.909	-0.487496	0.160994	-3.02803	0.00246154	0.046878	Down Regulated in ART
ENSG00000168310	IRF2	protein_coding	1681.27	-0.400723	0.105702	-3.79108	0.000149994	0.00877262	Down Regulated in ART
ENSG00000109775	UFSP2	protein_coding	364.023	-0.418971	0.136626	-3.06656	0.00216537	0.0429896	Down Regulated in ART
ENSG00000073578	SDHA	protein_coding	342.672	0.434499	0.0994407	4.36942	1.24575e-05	0.00178235	Up Regulated in ART
ENSG00000028310	BRD9	protein_coding	1368	0.262473	0.0737137	3.56071	0.000369855	0.0155646	Up Regulated in ART
ENSG00000112941	TENT4A	protein_coding	779.407	0.389852	0.0911629	4.27643	1.89917e-05	0.00229919	Up Regulated in ART
ENSG00000154122	ANKH	protein_coding	1254.43	-0.374553	0.107905	-3.47115	0.000518231	0.0189675	Down Regulated in ART
ENSG00000113361	CDH6	protein_coding	1.83408	3.64459	1.16042	3.14075	0.00168517	0.0374983	Up Regulated in ART
ENSG00000082213	C5orf22	protein_coding	415.922	-0.491446	0.13949	-3.52316	0.000426428	0.0168162	Down Regulated in ART
ENSG00000113384	GOLPH3	protein_coding	2070.64	-0.362849	0.106444	-3.40883	0.000652422	0.022017	Down Regulated in ART
ENSG00000164187	LMBRD2	protein_coding	353.57	-0.542324	0.163457	-3.31785	0.000907137	0.0262776	Down Regulated in ART
ENSG00000171522	PTGER4	protein_coding	2422.9	-0.595169	0.183592	-3.2418	0.00118776	0.0307215	Down Regulated in ART
ENSG00000198865	CCDC152	protein_coding	66.7757	-0.978958	0.276616	-3.53905	0.000401564	0.0160149	Down Regulated in ART
ENSG00000175857	GAPT	protein_coding	886.97	-0.837472	0.226141	-3.70332	0.000212792	0.0108031	Down Regulated in ART
ENSG00000049167	ERCC8	protein_coding	236.059	-0.377147	0.109656	-3.43937	0.000583078	0.0205199	Down Regulated in ART
ENSG00000123213	NLN	protein_coding	355.569	-0.527242	0.167868	-3.14081	0.00168479	0.0374983	Down Regulated in ART
ENSG00000145740	SLC30A5	protein_coding	651.142	-0.392057	0.130243	-3.01018	0.00261091	0.0484459	Down Regulated in ART
ENSG00000172062	SMN1	protein_coding	185.686	0.438334	0.132098	3.31824	0.000905857	0.0262776	Up Regulated in ART
ENSG00000164253	WDR41	protein_coding	587.726	-0.437014	0.133116	-3.28297	0.00102721	0.0283169	Down Regulated in ART
ENSG00000085365	SCAMP1	protein_coding	522.889	-0.679946	0.168177	-4.04304	5.2763e-05	0.00452195	Down Regulated in ART
ENSG00000174132	FAM174A	protein_coding	82.8329	-0.55275	0.146667	-3.76874	0.000164073	0.0092522	Down Regulated in ART
ENSG00000164209	SLC25A46	protein_coding	1063.15	-0.437693	0.143403	-3.05219	0.00227178	0.0442896	Down Regulated in ART
ENSG00000164221	CCDC112	protein_coding	273.942	-0.387111	0.126796	-3.05303	0.00226544	0.0442656	Down Regulated in ART
ENSG00000169570	DTWD2	protein_coding	85.42	-0.742239	0.181027	-4.10015	4.12875e-05	0.00388461	Down Regulated in ART
ENSG00000145779	TNFAIP8	protein_coding	3138.86	-0.417769	0.136059	-3.0705	0.00213704	0.0427704	Down Regulated in ART
ENSG00000186687	LYRM7	protein_coding	406.261	-0.534973	0.16617	-3.21944	0.00128443	0.031992	Down Regulated in ART
ENSG00000113615	SEC24A	protein_coding	663.704	-0.336449	0.0843267	-3.98983	6.61205e-05	0.00508746	Down Regulated in ART
ENSG00000255833	TIFAB	protein_coding	29.4672	-1.05311	0.3093	-3.40483	0.00066206	0.0222555	Down Regulated in ART
ENSG00000170476	MZB1	protein_coding	493.774	1.25583	0.370775	3.38703	0.000706536	0.0229055	Up Regulated in ART
ENSG00000254996	ANKHD1-EIF4EBP3	protein_coding	62.2546	0.622612	0.184295	3.37834	0.000729239	0.0233097	Up Regulated in ART
ENSG00000112855	HARS2	protein_coding	772.337	0.247627	0.0738968	3.35098	0.000805259	0.0246622	Up Regulated in ART
ENSG00000197948	FCHSD1	protein_coding	2134.74	0.420239	0.129266	3.25096	0.00115017	0.0301694	Up Regulated in ART
ENSG00000113555	PCDH12	protein_coding	35.7471	-1.43871	0.319708	-4.50008	6.79267e-06	0.00119421	Down Regulated in ART
ENSG00000133706	LARS	protein_coding	2677.01	-0.333838	0.102116	-3.26921	0.0010785	0.0288596	Down Regulated in ART
ENSG00000113716	HMGXB3	protein_coding	1359.5	0.308178	0.082698	3.72655	0.000194118	0.0101836	Up Regulated in ART
ENSG00000177556	ATOX1	protein_coding	559.188	0.347237	0.0986966	3.51823	0.000434441	0.0170545	Up Regulated in ART
ENSG00000082516	GEMIN5	protein_coding	281.365	-0.437883	0.0988985	-4.4276	9.52892e-06	0.00149968	Down Regulated in ART
ENSG00000164332	UBLCP1	protein_coding	850.428	-0.405459	0.118668	-3.41676	0.00063372	0.0216536	Down Regulated in ART
ENSG00000113328	CCNG1	protein_coding	2353.41	-0.408374	0.124098	-3.29073	0.00099926	0.0279355	Down Regulated in ART
ENSG00000113643	RARS	protein_coding	597.002	0.373078	0.118115	3.15862	0.0015852	0.0362222	Up Regulated in ART
ENSG00000048162	NOP16	protein_coding	296.585	0.443134	0.116126	3.81597	0.000135647	0.00823971	Up Regulated in ART
ENSG00000113194	FAF2	protein_coding	1062.81	0.275112	0.0893759	3.07814	0.00208294	0.0422815	Up Regulated in ART
ENSG00000169228	RAB24	protein_coding	191.527	0.632973	0.207937	3.04406	0.00233406	0.0450973	Up Regulated in ART
ENSG00000169131	ZNF354A	protein_coding	464.156	-0.439074	0.123976	-3.54159	0.000397721	0.0160149	Down Regulated in ART
ENSG00000127022	CANX	protein_coding	10632.9	-0.47699	0.142402	-3.34959	0.000809307	0.0247103	Down Regulated in ART
ENSG00000239264	TXNDC5	protein_coding	27.1212	1.46868	0.324642	4.524	6.06823e-06	0.00114745	Up Regulated in ART
ENSG00000078401	EDN1	protein_coding	15.5731	1.09349	0.318221	3.43627	0.000589778	0.0207104	Up Regulated in ART
ENSG00000137198	GMPR	protein_coding	263.671	1.03198	0.313722	3.28949	0.0010037	0.0279355	Up Regulated in ART
ENSG00000112312	GMNN	protein_coding	116.018	0.616639	0.204787	3.01113	0.00260278	0.0484459	Up Regulated in ART
ENSG00000187837	HIST1H1C	protein_coding	308.891	0.564047	0.182726	3.08684	0.00202295	0.0414943	Up Regulated in ART
ENSG00000273802	HIST1H2BG	protein_coding	91.3566	0.799648	0.252699	3.16443	0.00155385	0.0358671	Up Regulated in ART
ENSG00000189298	ZKSCAN3	protein_coding	151.936	-0.456809	0.127922	-3.571	0.000355621	0.0151638	Down Regulated in ART
ENSG00000204681	GABBR1	protein_coding	2511.71	0.573489	0.119108	4.81485	1.47311e-06	0.000479959	Up Regulated in ART
ENSG00000234127	TRIM26	protein_coding	1537.75	0.305016	0.0705494	4.32344	1.53618e-05	0.00195547	Up Regulated in ART
ENSG00000241370	RPP21	protein_coding	46.7925	0.820219	0.196017	4.18443	2.85889e-05	0.00295851	Up Regulated in ART
ENSG00000204574	ABCF1	protein_coding	1504.89	0.241451	0.0640288	3.77098	0.00016261	0.00922985	Up Regulated in ART
ENSG00000137343	ATAT1	protein_coding	132.472	0.493935	0.125106	3.94812	7.87659e-05	0.0056831	Up Regulated in ART
ENSG00000204564	C6orf136	protein_coding	337.689	0.495906	0.0967397	5.12619	2.95662e-07	0.000210416	Up Regulated in ART
ENSG00000234745	HLA-B	protein_coding	134640	0.314511	0.104811	3.00076	0.0026931	0.049444	Up Regulated in ART
ENSG00000198563	DDX39B	protein_coding	8762.63	0.316335	0.0951252	3.32546	0.000882714	0.0260333	Up Regulated in ART
ENSG00000204444	APOM	protein_coding	89.5534	0.592949	0.170401	3.47972	0.000501934	0.0184882	Up Regulated in ART
ENSG00000240053	LY6G5B	protein_coding	149.606	0.818434	0.210983	3.87915	0.000104821	0.00687818	Up Regulated in ART
ENSG00000204427	ABHD16A	protein_coding	110.15	0.527691	0.151098	3.49237	0.00047876	0.0180573	Up Regulated in ART
ENSG00000228727	SAPCD1	protein_coding	11.0358	1.41223	0.319759	4.41655	1.00288e-05	0.00153645	Up Regulated in ART
ENSG00000204351	SKIV2L	protein_coding	1582.09	0.385457	0.0960613	4.01261	6.00512e-05	0.00483707	Up Regulated in ART
ENSG00000204257	HLA-DMA	protein_coding	5762.77	0.445228	0.132999	3.3476	0.000815154	0.0247578	Up Regulated in ART
ENSG00000223501	VPS52	protein_coding	1625.67	0.40554	0.0814394	4.97966	6.36959e-07	0.000302643	Up Regulated in ART
ENSG00000161904	LEMD2	protein_coding	1246.49	0.256749	0.0819735	3.1321	0.0017356	0.0379378	Up Regulated in ART
ENSG00000064995	TAF11	protein_coding	898.272	0.334924	0.0820317	4.08286	4.44842e-05	0.00403199	Up Regulated in ART
ENSG00000137409	MTCH1	protein_coding	4354.99	0.365597	0.120537	3.03306	0.00242084	0.0464115	Up Regulated in ART
ENSG00000137200	CMTR1	protein_coding	2629.49	0.336672	0.0948896	3.54804	0.000388114	0.0159531	Up Regulated in ART
ENSG00000124602	UNC5CL	protein_coding	92.2098	0.410199	0.122044	3.36107	0.000776403	0.0241621	Up Regulated in ART
ENSG00000188112	C6orf132	protein_coding	2.85864	-2.8313	0.86533	-3.27193	0.00106817	0.0287591	Down Regulated in ART
ENSG00000048544	MRPS10	protein_coding	714.466	-0.288907	0.0959751	-3.01023	0.00261054	0.0484459	Down Regulated in ART
ENSG00000024048	UBR2	protein_coding	2059.59	0.479466	0.137118	3.49674	0.000470981	0.0179446	Up Regulated in ART
ENSG00000171611	PTCRA	protein_coding	200.259	0.860422	0.26687	3.22413	0.00126358	0.0317442	Up Regulated in ART
ENSG00000146215	CRIP3	protein_coding	50.3376	0.897835	0.283834	3.16323	0.00156027	0.0358992	Up Regulated in ART
ENSG00000171453	POLR1C	protein_coding	423.26	0.644625	0.119919	5.3755	7.63714e-08	9.59453e-05	Up Regulated in ART
ENSG00000172432	GTPBP2	protein_coding	2211.51	0.281332	0.0878545	3.20224	0.00136362	0.0332961	Up Regulated in ART
ENSG00000146070	PLA2G7	protein_coding	377.935	-1.17853	0.247798	-4.75601	1.97454e-06	0.000560381	Down Regulated in ART
ENSG00000031691	CENPQ	protein_coding	78.8258	-0.746741	0.236722	-3.15451	0.00160768	0.0363345	Down Regulated in ART
ENSG00000168216	LMBRD1	protein_coding	1347.21	-0.306138	0.095943	-3.19084	0.00141862	0.0342707	Down Regulated in ART
ENSG00000119900	OGFRL1	protein_coding	4249.25	-0.578935	0.185976	-3.11296	0.0018522	0.0396357	Down Regulated in ART
ENSG00000135314	KHDC1	protein_coding	26.2868	0.827589	0.271344	3.04996	0.00228872	0.0445194	Up Regulated in ART
ENSG00000146278	PNRC1	protein_coding	5902.67	-0.334731	0.105393	-3.17602	0.00149312	0.0350534	Down Regulated in ART
ENSG00000118412	CASP8AP2	protein_coding	1108.05	-0.579874	0.153318	-3.78217	0.000155469	0.0089214	Down Regulated in ART
ENSG00000132424	PNISR	protein_coding	6826.16	0.321898	0.0814898	3.95016	7.80985e-05	0.00568084	Up Regulated in ART
ENSG00000081087	OSTM1	protein_coding	1177.72	-0.657167	0.130629	-5.0308	4.88444e-07	0.000248704	Down Regulated in ART
ENSG00000135596	MICAL1	protein_coding	4015.56	0.373722	0.116766	3.2006	0.00137143	0.0334397	Up Regulated in ART
ENSG00000123500	COL10A1	protein_coding	4.7289	3.37334	0.929881	3.62771	0.000285946	0.0132008	Up Regulated in ART
ENSG00000093144	ECHDC1	protein_coding	1232.73	-0.642044	0.126945	-5.05765	4.2445e-07	0.000229627	Down Regulated in ART
ENSG00000164484	TMEM200A	protein_coding	43.8624	-1.03205	0.314857	-3.27784	0.00104605	0.0285874	Down Regulated in ART
ENSG00000118507	AKAP7	protein_coding	374.605	-0.628805	0.134656	-4.6697	3.01637e-06	0.000728301	Down Regulated in ART
ENSG00000118523	CCN2	protein_coding	2.47974	3.4065	0.950385	3.58433	0.00033794	0.0148488	Up Regulated in ART
ENSG00000118513	MYB	protein_coding	216.789	1.07134	0.260529	4.11218	3.91937e-05	0.00372814	Up Regulated in ART
ENSG00000135521	LTV1	protein_coding	438.127	0.302575	0.0972569	3.11109	0.00186395	0.0397323	Up Regulated in ART
ENSG00000146476	ARMT1	protein_coding	305.306	-0.714035	0.159361	-4.48063	7.44245e-06	0.00126317	Down Regulated in ART
ENSG00000130363	RSPH3	protein_coding	158.343	-0.570549	0.155286	-3.67418	0.000238613	0.0117354	Down Regulated in ART
ENSG00000164691	TAGAP	protein_coding	4216.64	-0.455679	0.145385	-3.13429	0.00172273	0.0378476	Down Regulated in ART
ENSG00000120438	TCP1	protein_coding	2899.65	0.224743	0.0685502	3.27852	0.00104352	0.0285846	Up Regulated in ART
ENSG00000026652	AGPAT4	protein_coding	755.803	0.564321	0.175899	3.20822	0.00133559	0.0328901	Up Regulated in ART
ENSG00000026297	RNASET2	protein_coding	2020.58	0.488328	0.126495	3.86046	0.000113176	0.0072033	Up Regulated in ART
ENSG00000112592	TBP	protein_coding	403.896	0.273679	0.0711225	3.84799	0.00011909	0.00749705	Up Regulated in ART
ENSG00000156928	MALSU1	protein_coding	213.36	0.347464	0.106354	3.26704	0.00108677	0.0289005	Up Regulated in ART
ENSG00000169193	CCDC126	protein_coding	152.153	-0.693269	0.148056	-4.68249	2.83415e-06	0.000700925	Down Regulated in ART
ENSG00000106100	NOD1	protein_coding	627.714	0.240483	0.0800273	3.00502	0.00265567	0.0489095	Up Regulated in ART
ENSG00000010270	STARD3NL	protein_coding	955.677	-0.324364	0.10081	-3.21757	0.0012928	0.0320187	Down Regulated in ART
ENSG00000006451	RALA	protein_coding	677.015	-0.50941	0.116634	-4.36759	1.25623e-05	0.00178261	Down Regulated in ART
ENSG00000136271	DDX56	protein_coding	1485.86	0.428029	0.105957	4.03964	5.35326e-05	0.00454292	Up Regulated in ART
ENSG00000122515	ZMIZ2	protein_coding	2313.55	0.365607	0.119424	3.06142	0.00220289	0.0435574	Up Regulated in ART
ENSG00000183696	UPP1	protein_coding	1849.05	0.540825	0.123636	4.37433	1.21809e-05	0.00178235	Up Regulated in ART
ENSG00000106078	COBL	protein_coding	4.52034	-2.17837	0.6829	-3.18988	0.00142333	0.0342707	Down Regulated in ART
ENSG00000071462	BUD23	protein_coding	1408.63	0.284411	0.0926227	3.07064	0.00213602	0.0427704	Up Regulated in ART
ENSG00000106089	STX1A	protein_coding	115.369	0.738491	0.196827	3.75198	0.000175443	0.0095345	Up Regulated in ART
ENSG00000127951	FGL2	protein_coding	12623.9	-0.789437	0.241527	-3.26852	0.0010811	0.0288596	Down Regulated in ART
ENSG00000135211	TMEM60	protein_coding	168.615	-0.583326	0.181211	-3.21904	0.00128618	0.031992	Down Regulated in ART
ENSG00000075303	SLC25A40	protein_coding	541.587	-0.645554	0.162717	-3.96734	7.26799e-05	0.00540015	Down Regulated in ART
ENSG00000105793	GTPBP10	protein_coding	386.29	-0.568257	0.148156	-3.83552	0.000125298	0.00775415	Down Regulated in ART
ENSG00000198742	SMURF1	protein_coding	731.407	0.522926	0.149587	3.49579	0.000472663	0.0179446	Up Regulated in ART
ENSG00000166508	MCM7	protein_coding	2605.56	0.315474	0.0990031	3.1865	0.00144005	0.0343864	Up Regulated in ART
ENSG00000239521	CASTOR3	protein_coding	304.776	0.375524	0.104157	3.60535	0.000311729	0.0140905	Up Regulated in ART
ENSG00000160999	SH2B2	protein_coding	195.035	0.708444	0.21087	3.35963	0.00078048	0.0241711	Up Regulated in ART
ENSG00000105821	DNAJC2	protein_coding	767.063	0.396026	0.0837329	4.72964	2.2492e-06	0.000608408	Up Regulated in ART
ENSG00000164603	BMT2	protein_coding	528.151	-0.780548	0.136856	-5.70342	1.17425e-08	3.17867e-05	Down Regulated in ART
ENSG00000214194	SMIM30	protein_coding	335.846	-0.494719	0.153232	-3.22856	0.00124415	0.0314435	Down Regulated in ART
ENSG00000135269	TES	protein_coding	3126.31	-0.309665	0.0855675	-3.61896	0.000295791	0.0135469	Down Regulated in ART
ENSG00000128513	POT1	protein_coding	471.281	-0.497801	0.121738	-4.08911	4.33039e-05	0.00400041	Down Regulated in ART
ENSG00000135253	KCP	protein_coding	10.6623	1.63783	0.447363	3.66107	0.000251161	0.0120914	Up Regulated in ART
ENSG00000186591	UBE2H	protein_coding	1572.86	0.256318	0.0789147	3.24803	0.00116206	0.0303432	Up Regulated in ART
ENSG00000146842	TMEM209	protein_coding	453.839	-0.560714	0.138512	-4.04812	5.16313e-05	0.00449166	Down Regulated in ART
ENSG00000146859	TMEM140	protein_coding	555.339	0.508101	0.168612	3.01344	0.00258307	0.0482324	Up Regulated in ART
ENSG00000059378	PARP12	protein_coding	2210.63	0.419476	0.127989	3.27744	0.00104753	0.0285874	Up Regulated in ART
ENSG00000197993	KEL	protein_coding	9.10078	1.44657	0.404257	3.57835	0.000345776	0.0150027	Up Regulated in ART
ENSG00000106462	EZH2	protein_coding	349.585	0.436441	0.104048	4.19459	2.73362e-05	0.00289158	Up Regulated in ART
ENSG00000170260	ZNF212	protein_coding	237.097	0.81039	0.127674	6.34735	2.19061e-10	3.79238e-06	Up Regulated in ART
ENSG00000213203	GIMAP1	protein_coding	1121.65	-0.708002	0.191484	-3.69745	0.000217774	0.0109916	Down Regulated in ART
ENSG00000133627	ACTR3B	protein_coding	155.361	0.359164	0.115059	3.12155	0.00179902	0.0390284	Up Regulated in ART
ENSG00000155093	PTPRN2	protein_coding	163.273	-0.59357	0.15688	-3.78358	0.000154589	0.0089208	Down Regulated in ART
ENSG00000182378	PLCXD1	protein_coding	442.001	0.762743	0.147919	5.15649	2.51617e-07	0.000199036	Up Regulated in ART
ENSG00000101911	PRPS2	protein_coding	538.114	-0.406215	0.119513	-3.39891	0.000676548	0.0223681	Down Regulated in ART
ENSG00000177189	RPS6KA3	protein_coding	4544	-0.448634	0.130163	-3.44671	0.000567452	0.0201306	Down Regulated in ART
ENSG00000147121	KRBOX4	protein_coding	416.791	-0.437621	0.120993	-3.61691	0.000298136	0.0136183	Down Regulated in ART
ENSG00000102225	CDK16	protein_coding	1333.22	0.593503	0.151517	3.91707	8.96303e-05	0.00618199	Up Regulated in ART
ENSG00000102226	USP11	protein_coding	851.034	0.344378	0.0962355	3.57849	0.000345585	0.0150027	Up Regulated in ART
ENSG00000147124	ZNF41	protein_coding	388.144	-0.316516	0.10454	-3.02771	0.00246413	0.046878	Down Regulated in ART
ENSG00000094631	HDAC6	protein_coding	1579.47	0.464526	0.0957451	4.8517	1.22408e-06	0.000432476	Up Regulated in ART
ENSG00000068400	GRIPAP1	protein_coding	2073.99	0.291247	0.0958714	3.03789	0.00238242	0.0457256	Up Regulated in ART
ENSG00000196998	WDR45	protein_coding	1959.86	0.331721	0.102982	3.22116	0.00127673	0.031906	Up Regulated in ART
ENSG00000158578	ALAS2	protein_coding	385.194	5.8931	1.27624	4.61753	3.88338e-06	0.000840364	Up Regulated in ART
ENSG00000147162	OGT	protein_coding	10353.7	0.5698	0.152336	3.74042	0.000183715	0.00984667	Up Regulated in ART
ENSG00000131269	ABCB7	protein_coding	713.551	-0.303134	0.080505	-3.76541	0.000166276	0.00931574	Down Regulated in ART
ENSG00000085224	ATRX	protein_coding	2214.25	-0.421261	0.137333	-3.06745	0.00215893	0.0429109	Down Regulated in ART
ENSG00000102158	MAGT1	protein_coding	1684.52	-0.500381	0.145488	-3.43932	0.000583168	0.0205199	Down Regulated in ART
ENSG00000173198	CYSLTR1	protein_coding	649.645	-0.541349	0.164179	-3.29731	0.00097615	0.0274336	Down Regulated in ART
ENSG00000155008	APOOL	protein_coding	237.154	-0.556535	0.151947	-3.6627	0.000249569	0.0120914	Down Regulated in ART
ENSG00000241343	RPL36A	protein_coding	142.338	0.741549	0.163788	4.52749	5.96891e-06	0.00114745	Up Regulated in ART
ENSG00000101888	NXT2	protein_coding	423.561	-0.498802	0.151058	-3.30206	0.000959764	0.0270798	Down Regulated in ART
ENSG00000101882	NKAP	protein_coding	455.893	0.48069	0.134789	3.56623	0.000362158	0.0153669	Up Regulated in ART
ENSG00000134602	STK26	protein_coding	1355.19	-0.433074	0.144553	-2.99594	0.00273597	0.0499106	Down Regulated in ART
ENSG00000165359	INTS6L	protein_coding	1237.04	0.318895	0.0982022	3.24733	0.00116493	0.0303725	Up Regulated in ART
ENSG00000130821	SLC6A8	protein_coding	41.1881	1.15461	0.33954	3.40052	0.000672569	0.0223681	Up Regulated in ART
ENSG00000203879	GDI1	protein_coding	3202.62	0.364305	0.0882635	4.12747	3.66779e-05	0.00356723	Up Regulated in ART
ENSG00000155959	VBP1	protein_coding	708.796	-0.435325	0.127879	-3.4042	0.000663585	0.0222635	Down Regulated in ART
ENSG00000176595	KBTBD11	protein_coding	491.688	-0.486173	0.153939	-3.15822	0.00158734	0.0362222	Down Regulated in ART
ENSG00000104626	ERI1	protein_coding	260.226	-0.360163	0.117952	-3.05346	0.00226215	0.0442513	Down Regulated in ART
ENSG00000154359	LONRF1	protein_coding	242.241	0.600542	0.162308	3.70003	0.000215577	0.0109125	Up Regulated in ART
ENSG00000164741	DLC1	protein_coding	18.179	1.12437	0.280443	4.00926	6.09087e-05	0.00485922	Up Regulated in ART
ENSG00000104219	ZDHHC2	protein_coding	1148.25	-0.474585	0.153181	-3.0982	0.001947	0.0407084	Down Regulated in ART
ENSG00000155975	VPS37A	protein_coding	526.379	-0.378078	0.0864999	-4.37085	1.23763e-05	0.00178235	Down Regulated in ART
ENSG00000168476	REEP4	protein_coding	728.339	0.569374	0.18594	3.06214	0.00219762	0.0435299	Up Regulated in ART
ENSG00000147454	SLC25A37	protein_coding	1442.47	0.41852	0.122981	3.40312	0.000666218	0.0222656	Up Regulated in ART
ENSG00000277586	NEFL	protein_coding	106.273	-1.1716	0.372774	-3.14293	0.00167268	0.0373645	Down Regulated in ART
ENSG00000104695	PPP2CB	protein_coding	760.456	-0.428734	0.106033	-4.04342	5.26771e-05	0.00452195	Down Regulated in ART
ENSG00000147471	PLPBP	protein_coding	1061.87	-0.416048	0.107468	-3.87136	0.000108232	0.00699143	Down Regulated in ART
ENSG00000070718	AP3M2	protein_coding	625.669	0.546892	0.156971	3.48403	0.00049392	0.0183492	Up Regulated in ART
ENSG00000176209	SMIM19	protein_coding	475.967	-0.286107	0.092555	-3.09122	0.00199338	0.0411002	Down Regulated in ART
ENSG00000169139	UBE2V2	protein_coding	718.141	-0.574299	0.141341	-4.0632	4.84036e-05	0.00429864	Down Regulated in ART
ENSG00000187735	TCEA1	protein_coding	2482.69	-0.359956	0.108047	-3.33147	0.000863898	0.0257137	Down Regulated in ART
ENSG00000120992	LYPLA1	protein_coding	1320.93	-0.459947	0.11855	-3.87978	0.000104551	0.00687818	Down Regulated in ART
ENSG00000104442	ARMC1	protein_coding	552.606	-0.680975	0.134425	-5.06585	4.06588e-07	0.00022706	Down Regulated in ART
ENSG00000147592	LACTB2	protein_coding	136.075	-0.972642	0.193317	-5.03134	4.87063e-07	0.000248704	Down Regulated in ART
ENSG00000147586	MRPS28	protein_coding	78.0135	-0.628033	0.135467	-4.63606	3.55105e-06	0.00080058	Down Regulated in ART
ENSG00000104231	ZFAND1	protein_coding	1052.65	-0.257048	0.0830635	-3.0946	0.00197077	0.0409088	Down Regulated in ART
ENSG00000133742	CA1	protein_coding	51.0013	4.14426	0.773154	5.3602	8.31319e-08	9.59453e-05	Up Regulated in ART
ENSG00000085719	CPNE3	protein_coding	1497.86	-0.458322	0.137213	-3.34023	0.000837099	0.0252208	Down Regulated in ART
ENSG00000205133	TRIQK	protein_coding	301.038	-0.6943	0.20497	-3.38733	0.000705764	0.0229055	Down Regulated in ART
ENSG00000156471	PTDSS1	protein_coding	3006.49	-0.18107	0.0524414	-3.45281	0.000554774	0.0198026	Down Regulated in ART
ENSG00000120963	ZNF706	protein_coding	1511.86	0.251257	0.0662538	3.79234	0.000149237	0.00875794	Up Regulated in ART
ENSG00000155090	KLF10	protein_coding	4869.49	0.583696	0.19173	3.04436	0.00233177	0.0450973	Up Regulated in ART
ENSG00000164930	FZD6	protein_coding	47.8853	-1.00561	0.303521	-3.31316	0.000922486	0.0265284	Down Regulated in ART
ENSG00000147650	LRP12	protein_coding	69.3614	-0.675883	0.214148	-3.15616	0.00159863	0.0362222	Down Regulated in ART
ENSG00000120526	NUDCD1	protein_coding	347.23	-0.501532	0.159966	-3.13524	0.00171713	0.0377884	Down Regulated in ART
ENSG00000189376	C8orf76	protein_coding	59.8875	0.505708	0.147823	3.42105	0.000623809	0.0215127	Up Regulated in ART
ENSG00000259305	ZHX1-C8orf76	protein_coding	5.95071	1.61594	0.427282	3.78191	0.00015563	0.0089214	Up Regulated in ART
ENSG00000164983	TMEM65	protein_coding	603.824	-0.353713	0.114887	-3.07879	0.00207845	0.0422815	Down Regulated in ART
ENSG00000164961	WASHC5	protein_coding	1134.6	-0.460376	0.111607	-4.12498	3.70772e-05	0.0035699	Down Regulated in ART
ENSG00000104472	CHRAC1	protein_coding	962.722	-0.295585	0.095568	-3.09293	0.00198191	0.0410417	Down Regulated in ART
ENSG00000167702	KIFC2	protein_coding	891.683	0.609598	0.182515	3.33999	0.000837811	0.0252208	Up Regulated in ART
ENSG00000178445	GLDC	protein_coding	29.9171	1.70221	0.557066	3.05566	0.00224563	0.0440774	Up Regulated in ART
ENSG00000164975	SNAPC3	protein_coding	437.042	-0.381561	0.107686	-3.54327	0.000395197	0.0160149	Down Regulated in ART
ENSG00000147889	CDKN2A	protein_coding	26.658	1.09749	0.266076	4.12473	3.71177e-05	0.0035699	Up Regulated in ART
ENSG00000120159	CAAP1	protein_coding	268.042	-0.374896	0.120417	-3.11331	0.00185001	0.0396357	Down Regulated in ART
ENSG00000175768	TOMM5	protein_coding	36.201	0.800488	0.194155	4.12293	3.74077e-05	0.00357791	Up Regulated in ART
ENSG00000134996	OSTF1	protein_coding	2740.07	-0.306284	0.101084	-3.03	0.00244556	0.0467818	Down Regulated in ART
ENSG00000135002	RFK	protein_coding	357.113	-0.431226	0.129127	-3.33955	0.00083914	0.0252208	Down Regulated in ART
ENSG00000165118	C9orf64	protein_coding	141.293	-1.05331	0.248562	-4.23763	2.25893e-05	0.00251954	Down Regulated in ART
ENSG00000106723	SPIN1	protein_coding	986.747	-0.364918	0.11542	-3.16165	0.0015688	0.0360201	Down Regulated in ART
ENSG00000148090	AUH	protein_coding	219.174	-0.242822	0.0803913	-3.0205	0.00252356	0.0474868	Down Regulated in ART
ENSG00000185963	BICD2	protein_coding	2056.06	-0.331464	0.106625	-3.10868	0.00187928	0.0399191	Down Regulated in ART
ENSG00000175787	ZNF169	protein_coding	213.834	0.521118	0.145826	3.57355	0.00035217	0.0150942	Up Regulated in ART
ENSG00000095209	TMEM38B	protein_coding	225.676	-0.415099	0.115373	-3.5979	0.0003208	0.0144252	Down Regulated in ART
ENSG00000119328	FAM206A	protein_coding	403.557	-0.294526	0.0890408	-3.30777	0.000940432	0.0268508	Down Regulated in ART
ENSG00000119471	HSDL2	protein_coding	561.776	-0.582671	0.15733	-3.70351	0.00021264	0.0108031	Down Regulated in ART
ENSG00000136869	TLR4	protein_coding	2304.65	-0.860574	0.255367	-3.36995	0.000751829	0.0236804	Down Regulated in ART
ENSG00000186130	ZBTB6	protein_coding	286.849	-0.557429	0.17661	-3.15627	0.001598	0.0362222	Down Regulated in ART
ENSG00000136950	ARPC5L	protein_coding	1300.07	0.617293	0.128292	4.81162	1.4971e-06	0.000479959	Up Regulated in ART
ENSG00000169155	ZBTB43	protein_coding	923.436	0.598234	0.187871	3.18428	0.00145117	0.0345566	Up Regulated in ART
ENSG00000148346	LCN2	protein_coding	93.1374	1.20248	0.365652	3.28859	0.00100692	0.0279355	Up Regulated in ART
ENSG00000106976	DNM1	protein_coding	47.4078	1.12281	0.268047	4.18884	2.80387e-05	0.00294185	Up Regulated in ART
ENSG00000148331	ASB6	protein_coding	1020.85	0.404845	0.101339	3.99496	6.47058e-05	0.00502326	Up Regulated in ART
ENSG00000130653	PNPLA7	protein_coding	198.113	0.679034	0.215105	3.15676	0.00159533	0.0362222	Up Regulated in ART
ENSG00000142082	SIRT3	protein_coding	322.633	0.34664	0.107617	3.22105	0.0012772	0.031906	Up Regulated in ART
ENSG00000142089	IFITM3	protein_coding	2845.55	1.28708	0.394312	3.26413	0.00109802	0.02911	Up Regulated in ART
ENSG00000132109	TRIM21	protein_coding	903.208	0.277955	0.0905604	3.06928	0.00214576	0.0427966	Up Regulated in ART
ENSG00000244734	HBB	protein_coding	37523.7	5.62631	0.994211	5.65907	1.52198e-08	3.17867e-05	Up Regulated in ART
ENSG00000132274	TRIM22	protein_coding	7993.05	0.405511	0.129232	3.13786	0.00170185	0.0377026	Up Regulated in ART
ENSG00000110171	TRIM3	protein_coding	339	0.448897	0.105169	4.26833	1.96945e-05	0.00236772	Up Regulated in ART
ENSG00000205339	IPO7	protein_coding	2052.69	-0.414315	0.1081	-3.83271	0.000126742	0.00780836	Down Regulated in ART
ENSG00000166478	ZNF143	protein_coding	670.619	-0.350104	0.111821	-3.13093	0.00174255	0.0380416	Down Regulated in ART
ENSG00000148926	ADM	protein_coding	214.956	1.12888	0.33433	3.37654	0.000734049	0.02336	Up Regulated in ART
ENSG00000110756	HPS5	protein_coding	554.734	-0.317636	0.101228	-3.13783	0.00170205	0.0377026	Down Regulated in ART
ENSG00000151116	UEVLD	protein_coding	315.958	-0.664747	0.157685	-4.21566	2.49044e-05	0.00271826	Down Regulated in ART
ENSG00000109911	ELP4	protein_coding	376.143	-0.294804	0.0927317	-3.17911	0.00147729	0.0349117	Down Regulated in ART
ENSG00000110422	HIPK3	protein_coding	3474.2	-0.611908	0.163104	-3.75163	0.000175688	0.0095345	Down Regulated in ART
ENSG00000085063	CD59	protein_coding	616.863	0.323564	0.1048	3.08744	0.00201885	0.0414648	Up Regulated in ART
ENSG00000121691	CAT	protein_coding	4078.48	-0.417506	0.137867	-3.02833	0.00245909	0.046878	Down Regulated in ART
ENSG00000166181	API5	protein_coding	2247.66	-0.383659	0.114307	-3.35638	0.000789687	0.0242825	Down Regulated in ART
ENSG00000052841	TTC17	protein_coding	2721.39	-0.161642	0.0452255	-3.57413	0.000351394	0.0150942	Down Regulated in ART
ENSG00000121671	CRY2	protein_coding	977.507	0.376816	0.118757	3.17299	0.0015088	0.0352978	Up Regulated in ART
ENSG00000234776	C11orf94	protein_coding	3.15088	-2.43508	0.695052	-3.50345	0.000459265	0.017787	Down Regulated in ART
ENSG00000110492	MDK	protein_coding	45.8463	0.842859	0.23573	3.57553	0.000349518	0.0150894	Up Regulated in ART
ENSG00000149182	ARFGAP2	protein_coding	2886.28	0.210897	0.0612432	3.44359	0.000574039	0.0202811	Up Regulated in ART
ENSG00000134574	DDB2	protein_coding	993.679	0.32159	0.0999408	3.2178	0.00129177	0.0320187	Up Regulated in ART
ENSG00000134571	MYBPC3	protein_coding	90.0983	0.750747	0.248867	3.01666	0.00255579	0.0478516	Up Regulated in ART
ENSG00000213619	NDUFS3	protein_coding	1214.75	0.352182	0.109709	3.21014	0.00132671	0.032718	Up Regulated in ART
ENSG00000149131	SERPING1	protein_coding	241.233	1.35774	0.408713	3.32198	0.000893814	0.0261823	Up Regulated in ART
ENSG00000166884	OR4D6	protein_coding	0.23757	19.631	4.14676	4.73404	2.2009e-06	0.000608408	Up Regulated in ART
ENSG00000166902	MRPL16	protein_coding	799.307	0.269362	0.0730145	3.68916	0.000224998	0.0112577	Up Regulated in ART
ENSG00000006118	TMEM132A	protein_coding	1.2358	-2.96944	0.934629	-3.17714	0.00148737	0.0349856	Down Regulated in ART
ENSG00000149483	TMEM138	protein_coding	776.219	0.377628	0.0945169	3.99535	6.45995e-05	0.00502326	Up Regulated in ART
ENSG00000149480	MTA2	protein_coding	3789.41	0.194823	0.0570508	3.41491	0.000638036	0.0217008	Up Regulated in ART
ENSG00000162231	NXF1	protein_coding	5804.33	0.357511	0.097843	3.65392	0.000258262	0.012283	Up Regulated in ART
ENSG00000072518	MARK2	protein_coding	2090.57	-0.310121	0.0770623	-4.02428	5.71487e-05	0.00477951	Down Regulated in ART
ENSG00000110583	NAA40	protein_coding	904.301	0.33733	0.107535	3.13694	0.00170721	0.0377026	Up Regulated in ART
ENSG00000168066	SF1	protein_coding	8731.55	0.304077	0.0854075	3.56031	0.000370416	0.0155646	Up Regulated in ART
ENSG00000173039	RELA	protein_coding	2546.23	0.300982	0.0970046	3.10275	0.00191729	0.0405277	Up Regulated in ART
ENSG00000087365	SF3B2	protein_coding	6434.55	0.15167	0.0491232	3.08754	0.00201821	0.0414648	Up Regulated in ART
ENSG00000174871	CNIH2	protein_coding	18.3835	1.41858	0.290081	4.89031	1.00678e-06	0.00039719	Up Regulated in ART
ENSG00000173715	C11orf80	protein_coding	193.469	0.550893	0.166843	3.30187	0.000960431	0.0270798	Up Regulated in ART
ENSG00000175505	CLCF1	protein_coding	206.812	0.772317	0.239364	3.22654	0.00125296	0.031528	Up Regulated in ART
ENSG00000054967	RELT	protein_coding	2029.49	0.766237	0.220858	3.46937	0.000521679	0.0190133	Up Regulated in ART
ENSG00000175538	KCNE3	protein_coding	995.377	-0.741664	0.209426	-3.54142	0.00039798	0.0160149	Down Regulated in ART
ENSG00000077514	POLD3	protein_coding	533.799	-0.510063	0.100043	-5.09846	3.42432e-07	0.000211721	Down Regulated in ART
ENSG00000165490	DDIAS	protein_coding	105.828	-0.779334	0.18347	-4.24775	2.15929e-05	0.00246208	Down Regulated in ART
ENSG00000137500	CCDC90B	protein_coding	628.616	-0.442213	0.0957128	-4.62021	3.83358e-06	0.000840087	Down Regulated in ART
ENSG00000180773	SLC36A4	protein_coding	550.473	-0.458407	0.14151	-3.23939	0.00119784	0.0307215	Down Regulated in ART
ENSG00000149308	NPAT	protein_coding	1017.44	-0.517717	0.147189	-3.51736	0.000435859	0.0170715	Down Regulated in ART
ENSG00000204381	LAYN	protein_coding	22.5584	0.998962	0.291371	3.42848	0.000606967	0.0211	Up Regulated in ART
ENSG00000150768	DLAT	protein_coding	511.766	-0.452679	0.10936	-4.13933	3.48316e-05	0.00348125	Down Regulated in ART
ENSG00000204370	SDHD	protein_coding	1229.15	-0.389195	0.10244	-3.79923	0.000145147	0.00863497	Down Regulated in ART
ENSG00000086827	ZW10	protein_coding	289.859	-0.505834	0.148309	-3.41068	0.000648	0.0219534	Down Regulated in ART
ENSG00000160613	PCSK7	protein_coding	4303.58	0.343651	0.0923964	3.71931	0.00019977	0.0103236	Up Regulated in ART
ENSG00000149573	MPZL2	protein_coding	118.463	-0.67919	0.182455	-3.72251	0.000197255	0.0102549	Down Regulated in ART
ENSG00000186166	CCDC84	protein_coding	492.279	0.495201	0.132574	3.73528	0.000187505	0.00991769	Up Regulated in ART
ENSG00000160695	VPS11	protein_coding	1693.9	0.228432	0.0734142	3.11156	0.00186105	0.0397268	Up Regulated in ART
ENSG00000151702	FLI1	protein_coding	4720.23	-0.42392	0.0827801	-5.12104	3.03858e-07	0.000210416	Down Regulated in ART
ENSG00000166105	GLB1L3	protein_coding	25.9431	0.929806	0.24749	3.75694	0.000172001	0.00947618	Up Regulated in ART
ENSG00000107937	GTPBP4	protein_coding	1017.58	0.374605	0.100104	3.74215	0.000182456	0.00980957	Up Regulated in ART
ENSG00000057608	GDI2	protein_coding	7270.93	-0.412405	0.116548	-3.5385	0.000402409	0.0160149	Down Regulated in ART
ENSG00000165630	PRPF18	protein_coding	375.516	-0.400023	0.112012	-3.57126	0.000355274	0.0151638	Down Regulated in ART
ENSG00000175395	ZNF25	protein_coding	545.266	-0.351151	0.111955	-3.13653	0.0017096	0.0377026	Down Regulated in ART
ENSG00000227345	PARG	protein_coding	387.418	-0.346074	0.0957059	-3.61601	0.000299176	0.0136298	Down Regulated in ART
ENSG00000188611	ASAH2	protein_coding	9.13926	-1.41184	0.452863	-3.11758	0.00182342	0.0393951	Down Regulated in ART
ENSG00000060339	CCAR1	protein_coding	1799.93	0.266	0.0834159	3.18884	0.00142845	0.0343209	Up Regulated in ART
ENSG00000079332	SAR1A	protein_coding	2002.43	0.418997	0.125871	3.32879	0.000872228	0.0258211	Up Regulated in ART
ENSG00000107758	PPP3CB	protein_coding	1545.7	-0.390626	0.110325	-3.54068	0.000399097	0.0160149	Down Regulated in ART
ENSG00000176986	SEC24C	protein_coding	4290.05	0.330042	0.0730757	4.51644	6.28879e-06	0.00114745	Up Regulated in ART
ENSG00000165424	ZCCHC24	protein_coding	175.551	-0.593473	0.167773	-3.53736	0.00040415	0.0160474	Down Regulated in ART
ENSG00000133678	TMEM254	protein_coding	400.706	-0.304929	0.0990803	-3.0776	0.00208677	0.0422815	Down Regulated in ART
ENSG00000204020	LIPN	protein_coding	156.181	-0.739362	0.223495	-3.30818	0.000939031	0.0268508	Down Regulated in ART
ENSG00000107798	LIPA	protein_coding	4035.48	-0.498939	0.158416	-3.14955	0.00163521	0.0367168	Down Regulated in ART
ENSG00000204010	IFIT1B	protein_coding	12.291	6.11735	1.24252	4.92333	8.50859e-07	0.000377694	Up Regulated in ART
ENSG00000152804	HHEX	protein_coding	911.761	0.494339	0.153042	3.23008	0.00123755	0.0313223	Up Regulated in ART
ENSG00000052749	RRP12	protein_coding	866.842	0.747085	0.194554	3.84	0.000123036	0.00766189	Up Regulated in ART
ENSG00000155252	PI4K2A	protein_coding	685.249	0.758402	0.211436	3.58692	0.000334609	0.0147774	Up Regulated in ART
ENSG00000155287	SLC25A28	protein_coding	1877.35	0.544547	0.107345	5.07284	3.91916e-07	0.000226162	Up Regulated in ART
ENSG00000107566	ERLIN1	protein_coding	447.203	-0.369144	0.118732	-3.10906	0.00187686	0.0399167	Down Regulated in ART
ENSG00000095485	CWF19L1	protein_coding	902.994	0.278418	0.0884249	3.14863	0.00164036	0.0367849	Up Regulated in ART
ENSG00000075826	SEC31B	protein_coding	1446.51	0.602791	0.156411	3.8539	0.000116253	0.00734518	Up Regulated in ART
ENSG00000166136	NDUFB8	protein_coding	268.949	0.454208	0.114037	3.98299	6.80545e-05	0.00519013	Up Regulated in ART
ENSG00000107819	SFXN3	protein_coding	1516.03	0.289246	0.0934413	3.09548	0.00196493	0.0409088	Up Regulated in ART
ENSG00000148840	PPRC1	protein_coding	913.555	0.379012	0.124344	3.04809	0.00230304	0.0446975	Up Regulated in ART
ENSG00000107862	GBF1	protein_coding	1717.24	0.470832	0.096589	4.8746	1.09032e-06	0.000406787	Up Regulated in ART
ENSG00000108039	XPNPEP1	protein_coding	1502	0.335399	0.0745506	4.49894	6.82916e-06	0.00119421	Up Regulated in ART
ENSG00000165806	CASP7	protein_coding	653.825	0.33629	0.104067	3.23146	0.00123158	0.0313159	Up Regulated in ART
ENSG00000197771	MCMBP	protein_coding	2134.82	-0.360532	0.106761	-3.377	0.0007328	0.02336	Down Regulated in ART
ENSG00000139190	VAMP1	protein_coding	1217.65	0.774283	0.155592	4.97636	6.47922e-07	0.000302643	Up Regulated in ART
ENSG00000111642	CHD4	protein_coding	327.692	0.378669	0.108286	3.49694	0.000470632	0.0179446	Up Regulated in ART
ENSG00000111644	ACRBP	protein_coding	1261.63	0.740152	0.245364	3.01654	0.00255677	0.0478516	Up Regulated in ART
ENSG00000198178	CLEC4C	protein_coding	67.0894	-1.43213	0.29186	-4.90691	9.25241e-07	0.00039719	Down Regulated in ART
ENSG00000089818	NECAP1	protein_coding	1258.45	0.47032	0.153854	3.05692	0.00223623	0.0439428	Up Regulated in ART
ENSG00000111729	CLEC4A	protein_coding	104.685	-0.78006	0.211191	-3.69363	0.000221076	0.0110935	Down Regulated in ART
ENSG00000003056	M6PR	protein_coding	4472.64	-0.301451	0.0894575	-3.36977	0.000752322	0.0236804	Down Regulated in ART
ENSG00000111269	CREBL2	protein_coding	1656.91	-0.616458	0.123448	-4.99365	5.92488e-07	0.000293062	Down Regulated in ART
ENSG00000111291	GPRC5D	protein_coding	18.4409	2.1532	0.484697	4.44236	8.89776e-06	0.00145488	Up Regulated in ART
ENSG00000004700	RECQL	protein_coding	1534.95	-0.343021	0.105851	-3.24062	0.0011927	0.0307215	Down Regulated in ART
ENSG00000205707	ETFRF1	protein_coding	303.613	-0.499909	0.133084	-3.75633	0.000172424	0.00947618	Down Regulated in ART
ENSG00000064115	TM7SF3	protein_coding	1199.98	-0.319959	0.082451	-3.8806	0.000104201	0.00687818	Down Regulated in ART
ENSG00000123106	CCDC91	protein_coding	766.155	-0.353161	0.0939168	-3.76036	0.000169667	0.00941432	Down Regulated in ART
ENSG00000087502	ERGIC2	protein_coding	376.376	-0.446397	0.125256	-3.56387	0.00036542	0.0154674	Down Regulated in ART
ENSG00000005175	RPAP3	protein_coding	778.22	-0.367415	0.120844	-3.0404	0.00236262	0.0454968	Down Regulated in ART
ENSG00000139636	LMBR1L	protein_coding	1876.87	0.443878	0.103103	4.3052	1.66835e-05	0.00206304	Up Regulated in ART
ENSG00000161791	FMNL3	protein_coding	1957.36	-0.394606	0.126436	-3.121	0.00180237	0.0390521	Down Regulated in ART
ENSG00000066117	SMARCD1	protein_coding	2135.58	0.298954	0.0718293	4.162	3.15466e-05	0.00321256	Up Regulated in ART
ENSG00000139624	CERS5	protein_coding	914.565	0.216518	0.0705404	3.06942	0.00214476	0.0427966	Up Regulated in ART
ENSG00000123268	ATF1	protein_coding	611.705	-0.605396	0.116856	-5.18068	2.21074e-07	0.000193341	Down Regulated in ART
ENSG00000135457	TFCP2	protein_coding	1384.98	-0.315601	0.0786988	-4.01023	6.06588e-05	0.00485922	Down Regulated in ART
ENSG00000139629	GALNT6	protein_coding	759.617	-0.367482	0.116249	-3.16118	0.00157132	0.03603	Down Regulated in ART
ENSG00000139631	CSAD	protein_coding	487.316	0.750871	0.14499	5.17876	2.23361e-07	0.000193341	Up Regulated in ART
ENSG00000182544	MFSD5	protein_coding	660.042	0.342998	0.102702	3.33973	0.000838589	0.0252208	Up Regulated in ART
ENSG00000012822	CALCOCO1	protein_coding	3300.84	0.307049	0.0725164	4.2342	2.29362e-05	0.00252912	Up Regulated in ART
ENSG00000123360	PDE1B	protein_coding	256.407	0.783877	0.180209	4.34982	1.36249e-05	0.00187558	Up Regulated in ART
ENSG00000135424	ITGA7	protein_coding	59.4419	0.567681	0.18792	3.02086	0.00252056	0.0474868	Up Regulated in ART
ENSG00000258311	AC009779.3	protein_coding	39.4722	0.928338	0.221907	4.18346	2.87101e-05	0.00295851	Up Regulated in ART
ENSG00000135441	BLOC1S1	protein_coding	425.698	0.721078	0.165952	4.34511	1.39207e-05	0.00189759	Up Regulated in ART
ENSG00000135437	RDH5	protein_coding	31.6429	0.924515	0.23151	3.99341	6.51292e-05	0.00503356	Up Regulated in ART
ENSG00000181852	RNF41	protein_coding	1502.61	-0.297555	0.0827897	-3.59411	0.000325508	0.0145692	Down Regulated in ART
ENSG00000135469	COQ10A	protein_coding	368.618	0.371784	0.121189	3.06781	0.00215631	0.042908	Up Regulated in ART
ENSG00000135473	PAN2	protein_coding	2679.83	0.368177	0.108474	3.39416	0.000688398	0.0226139	Up Regulated in ART
ENSG00000166886	NAB2	protein_coding	486.282	1.41009	0.304194	4.6355	3.5608e-06	0.00080058	Up Regulated in ART
ENSG00000166986	MARS	protein_coding	2768.76	0.305173	0.0648133	4.7085	2.49552e-06	0.000661719	Up Regulated in ART
ENSG00000178498	DTX3	protein_coding	779.921	0.414763	0.134705	3.07905	0.0020766	0.0422815	Up Regulated in ART
ENSG00000153179	RASSF3	protein_coding	3845.66	-0.527449	0.112972	-4.66885	3.02898e-06	0.000728301	Down Regulated in ART
ENSG00000155957	TMBIM4	protein_coding	322.026	-0.415231	0.13551	-3.0642	0.00218252	0.0432803	Down Regulated in ART
ENSG00000139291	TMEM19	protein_coding	440.725	-0.431354	0.139357	-3.09531	0.00196605	0.0409088	Down Regulated in ART
ENSG00000102189	EEA1	protein_coding	641.154	-0.567178	0.165879	-3.41923	0.000627985	0.0215708	Down Regulated in ART
ENSG00000028203	VEZT	protein_coding	770.132	-0.319537	0.100163	-3.19018	0.00142182	0.0342707	Down Regulated in ART
ENSG00000111142	METAP2	protein_coding	1565.79	-0.223156	0.0672856	-3.31656	0.000911345	0.0262776	Down Regulated in ART
ENSG00000111145	ELK3	protein_coding	1695.65	-0.452632	0.118182	-3.82997	0.000128158	0.0078122	Down Regulated in ART
ENSG00000120802	TMPO	protein_coding	3509.71	-0.356208	0.108279	-3.28971	0.00100291	0.0279355	Down Regulated in ART
ENSG00000166130	IKBIP	protein_coding	243.63	-0.579969	0.1851	-3.13326	0.00172874	0.0378834	Down Regulated in ART
ENSG00000120868	APAF1	protein_coding	1554.51	-0.464245	0.137669	-3.37218	0.00074577	0.0236029	Down Regulated in ART
ENSG00000120837	NFYB	protein_coding	564.203	-0.394736	0.0955685	-4.1304	3.62136e-05	0.00354198	Down Regulated in ART
ENSG00000198431	TXNRD1	protein_coding	1381.15	-0.311963	0.09438	-3.30539	0.000948434	0.0269355	Down Regulated in ART
ENSG00000174600	CMKLR1	protein_coding	907.138	-0.876729	0.275136	-3.18653	0.00143993	0.0343864	Down Regulated in ART
ENSG00000136003	ISCU	protein_coding	2845.15	0.335207	0.0741485	4.52075	6.16207e-06	0.00114745	Up Regulated in ART
ENSG00000135093	USP30	protein_coding	337.166	0.470331	0.134515	3.49648	0.000471439	0.0179446	Up Regulated in ART
ENSG00000111231	GPN3	protein_coding	242.061	-0.480877	0.141448	-3.39968	0.000674649	0.0223681	Down Regulated in ART
ENSG00000022840	RNF10	protein_coding	4087.26	0.248944	0.0628225	3.96266	7.41206e-05	0.00548366	Up Regulated in ART
ENSG00000135114	OASL	protein_coding	504.207	0.937033	0.311288	3.01018	0.0026109	0.0484459	Up Regulated in ART
ENSG00000089053	ANAPC5	protein_coding	4436.14	0.183131	0.0512928	3.57031	0.000356556	0.0151663	Up Regulated in ART
ENSG00000184445	KNTC1	protein_coding	460.162	0.409983	0.136384	3.00609	0.00264627	0.0488201	Up Regulated in ART
ENSG00000139726	DENR	protein_coding	1531.44	-0.371513	0.107574	-3.45357	0.000553214	0.0198026	Down Regulated in ART
ENSG00000111358	GTF2H3	protein_coding	502.366	-0.462387	0.117332	-3.94086	8.11909e-05	0.0057223	Down Regulated in ART
ENSG00000184992	BRI3BP	protein_coding	618.834	-0.402912	0.127553	-3.15877	0.00158435	0.0362222	Down Regulated in ART
ENSG00000060709	RIMBP2	protein_coding	12.4772	4.40527	1.46173	3.01373	0.00258057	0.0482324	Up Regulated in ART
ENSG00000177169	ULK1	protein_coding	946.343	0.495802	0.164141	3.02058	0.00252292	0.0474868	Up Regulated in ART
ENSG00000247077	PGAM5	protein_coding	543.172	-0.306106	0.0976765	-3.13388	0.00172512	0.0378521	Down Regulated in ART
ENSG00000176915	ANKLE2	protein_coding	2573.27	0.238279	0.0722063	3.29998	0.000966922	0.0272184	Up Regulated in ART
ENSG00000133106	EPSTI1	protein_coding	1276.57	0.751236	0.229506	3.27327	0.00106309	0.0286731	Up Regulated in ART
ENSG00000151773	CCDC122	protein_coding	41.8199	-1.27726	0.356484	-3.58293	0.000339766	0.0148609	Down Regulated in ART
ENSG00000139656	SMIM2	protein_coding	0.237447	17.1973	4.15166	4.14227	3.43882e-05	0.00347185	Up Regulated in ART
ENSG00000136143	SUCLA2	protein_coding	372.047	-0.319172	0.0980034	-3.25674	0.00112698	0.0296301	Down Regulated in ART
ENSG00000139687	RB1	protein_coding	1634.98	-0.428347	0.12666	-3.38187	0.000719955	0.0231241	Down Regulated in ART
ENSG00000204977	TRIM13	protein_coding	706.886	0.542572	0.125036	4.33932	1.42927e-05	0.00191169	Up Regulated in ART
ENSG00000186047	DLEU7	protein_coding	52.2971	-1.1148	0.327351	-3.40552	0.000660389	0.0222425	Down Regulated in ART
ENSG00000139668	WDFY2	protein_coding	1148.03	0.435497	0.137498	3.16728	0.0015387	0.0356601	Up Regulated in ART
ENSG00000150401	DCUN1D2	protein_coding	295.957	0.315086	0.0909154	3.46571	0.000528837	0.0192337	Up Regulated in ART
ENSG00000136319	TTC5	protein_coding	373.635	-0.339633	0.0908395	-3.73883	0.000184882	0.00987864	Down Regulated in ART
ENSG00000165782	PIP4P1	protein_coding	1670.16	0.504786	0.123377	4.09142	4.28744e-05	0.00400041	Up Regulated in ART
ENSG00000129538	RNASE1	protein_coding	24.3299	1.37907	0.423013	3.26011	0.00111369	0.0294134	Up Regulated in ART
ENSG00000100888	CHD8	protein_coding	2850.81	0.253351	0.0760709	3.33046	0.000867016	0.0257458	Up Regulated in ART
ENSG00000165819	METTL3	protein_coding	1711.98	0.433993	0.116204	3.73475	0.000187904	0.00991769	Up Regulated in ART
ENSG00000155463	OXA1L	protein_coding	4691.49	0.250429	0.0724547	3.45636	0.000547525	0.0196655	Up Regulated in ART
ENSG00000100836	PABPN1	protein_coding	1570.83	0.420889	0.0930641	4.52257	6.10937e-06	0.00114745	Up Regulated in ART
ENSG00000213983	AP1G2	protein_coding	4616	0.405284	0.120818	3.35452	0.000795041	0.0244038	Up Regulated in ART
ENSG00000092098	RNF31	protein_coding	58.4375	0.855766	0.200966	4.25827	2.06015e-05	0.0024177	Up Regulated in ART
ENSG00000213928	IRF9	protein_coding	362.028	0.864263	0.176431	4.8986	9.65242e-07	0.00039719	Up Regulated in ART
ENSG00000100918	REC8	protein_coding	619.145	0.983104	0.183281	5.36393	8.14311e-08	9.59453e-05	Up Regulated in ART
ENSG00000157379	DHRS1	protein_coding	492.549	0.448374	0.105234	4.26072	2.0377e-05	0.00241621	Up Regulated in ART
ENSG00000129467	ADCY4	protein_coding	107.301	0.639721	0.154463	4.14157	3.44939e-05	0.00347185	Up Regulated in ART
ENSG00000100441	KHNYN	protein_coding	4230.64	0.298946	0.0979641	3.05159	0.00227634	0.0443286	Up Regulated in ART
ENSG00000100445	SDR39U1	protein_coding	1389.59	0.615675	0.127228	4.83914	1.30399e-06	0.000451494	Up Regulated in ART
ENSG00000100448	CTSG	protein_coding	14.905	-3.74474	1.03281	-3.62579	0.000288076	0.0132637	Down Regulated in ART
ENSG00000129480	DTD2	protein_coding	188.035	-0.578371	0.152479	-3.79313	0.00014876	0.00875794	Down Regulated in ART
ENSG00000165389	SPTSSA	protein_coding	477.848	-0.544658	0.163498	-3.33129	0.000864451	0.0257137	Down Regulated in ART
ENSG00000129515	SNX6	protein_coding	1890.51	-0.346501	0.0921205	-3.7614	0.000168968	0.00940569	Down Regulated in ART
ENSG00000100934	SEC23A	protein_coding	1004.93	-0.48628	0.103648	-4.69164	2.71025e-06	0.000689997	Down Regulated in ART
ENSG00000100941	PNN	protein_coding	3376.68	0.472763	0.119758	3.94765	7.89221e-05	0.0056831	Up Regulated in ART
ENSG00000087299	L2HGDH	protein_coding	79.7554	-0.576878	0.139627	-4.13156	3.60308e-05	0.00354198	Down Regulated in ART
ENSG00000139921	TMX1	protein_coding	1123.35	-0.628137	0.137813	-4.5579	5.16686e-06	0.00102815	Down Regulated in ART
ENSG00000087303	NID2	protein_coding	8.95607	1.70462	0.439323	3.88011	0.000104411	0.00687818	Up Regulated in ART
ENSG00000100528	CNIH1	protein_coding	1426.03	-0.346072	0.110147	-3.14191	0.00167849	0.0374458	Down Regulated in ART
ENSG00000020577	SAMD4A	protein_coding	190.497	0.674859	0.212351	3.17803	0.0014828	0.0349254	Up Regulated in ART
ENSG00000070367	EXOC5	protein_coding	988.756	-0.565147	0.15064	-3.75163	0.000175686	0.0095345	Down Regulated in ART
ENSG00000100567	PSMA3	protein_coding	1333.18	0.284303	0.0757508	3.75314	0.000174636	0.0095345	Up Regulated in ART
ENSG00000050130	JKAMP	protein_coding	904.083	-0.375332	0.104759	-3.5828	0.000339934	0.0148609	Down Regulated in ART
ENSG00000133997	MED6	protein_coding	408.782	0.387372	0.089693	4.31887	1.56832e-05	0.0019818	Up Regulated in ART
ENSG00000197555	SIPA1L1	protein_coding	1621.35	0.364845	0.118591	3.0765	0.00209443	0.0422815	Up Regulated in ART
ENSG00000119711	ALDH6A1	protein_coding	212.125	-0.782238	0.148448	-5.26942	1.36853e-07	0.000139365	Down Regulated in ART
ENSG00000205659	LIN52	protein_coding	232.617	-0.415269	0.123553	-3.36107	0.000776423	0.0241621	Down Regulated in ART
ENSG00000119616	FCF1	protein_coding	836.524	-0.443976	0.0990267	-4.48339	7.34655e-06	0.00125924	Down Regulated in ART
ENSG00000119689	DLST	protein_coding	2650.18	0.218739	0.061927	3.53221	0.000412099	0.0162883	Up Regulated in ART
ENSG00000197734	C14orf178	protein_coding	1.06434	-3.32299	1.07308	-3.09667	0.00195705	0.0408198	Down Regulated in ART
ENSG00000100815	TRIP11	protein_coding	1173.68	-0.39801	0.104799	-3.79783	0.000145968	0.00865411	Down Regulated in ART
ENSG00000165934	CPSF2	protein_coding	1058.14	-0.616093	0.121252	-5.08108	3.7529e-07	0.000224035	Down Regulated in ART
ENSG00000066455	GOLGA5	protein_coding	1087.5	-0.334939	0.0879095	-3.81005	0.00013894	0.00841027	Down Regulated in ART
ENSG00000170270	GON7	protein_coding	170.309	-0.500816	0.115763	-4.3262	1.51704e-05	0.00195547	Down Regulated in ART
ENSG00000089737	DDX24	protein_coding	4839.62	0.491992	0.15022	3.27515	0.00105608	0.0286731	Up Regulated in ART
ENSG00000100744	GSKIP	protein_coding	345.208	-0.413535	0.121545	-3.40231	0.000668194	0.0222886	Down Regulated in ART
ENSG00000022976	ZNF839	protein_coding	465.1	0.364311	0.0979084	3.72094	0.000198482	0.0102878	Up Regulated in ART
ENSG00000196663	TECPR2	protein_coding	538.853	-0.343363	0.0912125	-3.76443	0.00016693	0.00932225	Down Regulated in ART
ENSG00000075413	MARK3	protein_coding	2298.88	0.216879	0.0645429	3.36022	0.000778793	0.0241621	Up Regulated in ART
ENSG00000134146	DPH6	protein_coding	146.888	-0.3216	0.104455	-3.07883	0.00207814	0.0422815	Down Regulated in ART
ENSG00000171262	FAM98B	protein_coding	243.584	-0.580218	0.14958	-3.87899	0.000104889	0.00687818	Down Regulated in ART
ENSG00000137842	TMEM62	protein_coding	392.029	0.304524	0.0957946	3.17893	0.00147818	0.0349117	Up Regulated in ART
ENSG00000184716	SERINC4	protein_coding	2.40531	-2.72006	0.879967	-3.09109	0.00199423	0.0411002	Down Regulated in ART
ENSG00000229474	PATL2	protein_coding	1338.63	0.800351	0.236541	3.38356	0.000715532	0.0230247	Up Regulated in ART
ENSG00000140263	SORD	protein_coding	302.77	-0.621396	0.129403	-4.80203	1.57065e-06	0.000494383	Down Regulated in ART
ENSG00000255302	EID1	protein_coding	3385.59	-0.536513	0.132044	-4.06313	4.84193e-05	0.00429864	Down Regulated in ART
ENSG00000104047	DTWD1	protein_coding	295.215	-0.389291	0.123321	-3.15673	0.0015955	0.0362222	Down Regulated in ART
ENSG00000138594	TMOD3	protein_coding	1452.55	-0.596228	0.153846	-3.87549	0.000106408	0.00695147	Down Regulated in ART
ENSG00000128915	ICE2	protein_coding	1156.89	-0.404504	0.108076	-3.74277	0.000182003	0.00980957	Down Regulated in ART
ENSG00000140451	PIF1	protein_coding	64.1605	0.933917	0.265874	3.51263	0.0004437	0.0173394	Up Regulated in ART
ENSG00000166192	SENP8	protein_coding	12.3486	-1.03789	0.335377	-3.09471	0.00197007	0.0409088	Down Regulated in ART
ENSG00000137817	PARP6	protein_coding	2475.9	0.36724	0.0866448	4.23846	2.2506e-05	0.00251954	Up Regulated in ART
ENSG00000159322	ADPGK	protein_coding	4033.15	0.257651	0.0797365	3.23128	0.00123236	0.0313159	Up Regulated in ART
ENSG00000140464	PML	protein_coding	1192.6	0.475362	0.149207	3.18592	0.00144294	0.034408	Up Regulated in ART
ENSG00000169410	PTPN9	protein_coding	1571.3	-0.26279	0.0845795	-3.10702	0.00188983	0.0399961	Down Regulated in ART
ENSG00000180953	ST20	protein_coding	45.6388	0.764141	0.24964	3.06097	0.00220623	0.0435574	Up Regulated in ART
ENSG00000172345	STARD5	protein_coding	161.974	0.704495	0.15607	4.51396	6.36293e-06	0.00114745	Up Regulated in ART
ENSG00000156232	WHAMM	protein_coding	1683.21	0.613592	0.175856	3.48917	0.000484526	0.0181955	Up Regulated in ART
ENSG00000157823	AP3S2	protein_coding	360.278	-0.378792	0.118174	-3.20539	0.0013488	0.0331213	Down Regulated in ART
ENSG00000166965	RCCD1	protein_coding	125.238	0.667517	0.19016	3.51029	0.000447623	0.0174533	Up Regulated in ART
ENSG00000184056	VPS33B	protein_coding	137.317	0.476511	0.0958482	4.97152	6.64304e-07	0.000302643	Up Regulated in ART
ENSG00000131876	SNRPA1	protein_coding	1235.58	0.395728	0.1022	3.8721	0.000107904	0.00699143	Up Regulated in ART
ENSG00000206177	HBM	protein_coding	3.58825	4.37702	1.28011	3.41924	0.000627953	0.0215708	Up Regulated in ART
ENSG00000188536	HBA2	protein_coding	1207.51	2.79938	0.880736	3.17845	0.00148063	0.0349219	Up Regulated in ART
ENSG00000206172	HBA1	protein_coding	957.501	4.9453	0.901356	5.48652	4.09938e-08	7.09684e-05	Up Regulated in ART
ENSG00000103202	NME4	protein_coding	558.807	0.820021	0.200695	4.08591	4.39046e-05	0.00400041	Up Regulated in ART
ENSG00000206053	JPT2	protein_coding	491.161	-0.580874	0.165738	-3.50477	0.000457003	0.0177391	Down Regulated in ART
ENSG00000006327	TNFRSF12A	protein_coding	86.5799	2.28972	0.49913	4.58742	4.48767e-06	0.000936031	Up Regulated in ART
ENSG00000140993	TIGD7	protein_coding	144.316	-0.663256	0.204856	-3.23768	0.00120508	0.0308267	Down Regulated in ART
ENSG00000187555	USP7	protein_coding	4941.98	0.218734	0.072747	3.00678	0.0026403	0.0487821	Up Regulated in ART
ENSG00000153066	TXNDC11	protein_coding	1968.41	0.408999	0.11401	3.5874	0.000333992	0.0147774	Up Regulated in ART
ENSG00000048462	TNFRSF17	protein_coding	89.7775	1.73925	0.430474	4.04032	5.33779e-05	0.00454292	Up Regulated in ART
ENSG00000183426	NPIPA1	protein_coding	310.155	0.550334	0.157423	3.49588	0.000472492	0.0179446	Up Regulated in ART
ENSG00000157045	NTAN1	protein_coding	929.279	0.372546	0.09504	3.91989	8.85889e-05	0.00613461	Up Regulated in ART
ENSG00000103226	NOMO3	protein_coding	212.096	-1.03171	0.344228	-2.99718	0.00272491	0.0497853	Down Regulated in ART
ENSG00000196678	ERI2	protein_coding	83.3362	-0.67266	0.209832	-3.2057	0.00134733	0.0331213	Down Regulated in ART
ENSG00000185864	NPIPB4	protein_coding	353.398	0.683985	0.199183	3.43395	0.000594846	0.020804	Up Regulated in ART
ENSG00000058600	POLR3E	protein_coding	919.537	0.383963	0.113988	3.36845	0.000755921	0.0237505	Up Regulated in ART
ENSG00000243716	NPIPB5	protein_coding	340.296	0.587195	0.188384	3.11702	0.0018269	0.0393951	Up Regulated in ART
ENSG00000077238	IL4R	protein_coding	5347.75	0.531728	0.167997	3.1651	0.00155028	0.0358325	Up Regulated in ART
ENSG00000176953	NFATC2IP	protein_coding	2126.06	0.274701	0.072202	3.80461	0.000142026	0.00853183	Up Regulated in ART
ENSG00000169682	SPNS1	protein_coding	69.5958	0.777927	0.231224	3.36439	0.000767125	0.0240153	Up Regulated in ART
ENSG00000213658	LAT	protein_coding	102.085	0.901572	0.185049	4.87207	1.10438e-06	0.000406787	Up Regulated in ART
ENSG00000079616	KIF22	protein_coding	1486.3	0.381912	0.121019	3.15579	0.00160062	0.0362222	Up Regulated in ART
ENSG00000090238	YPEL3	protein_coding	1932.94	0.451066	0.136411	3.30666	0.000944158	0.0268837	Up Regulated in ART
ENSG00000169217	CD2BP2	protein_coding	1940.75	0.366039	0.092567	3.95431	7.67559e-05	0.00561262	Up Regulated in ART
ENSG00000151006	PRSS53	protein_coding	64.2053	0.667442	0.167425	3.9865	6.70541e-05	0.00513646	Up Regulated in ART
ENSG00000156886	ITGAD	protein_coding	119.584	2.41188	0.774749	3.11311	0.00185128	0.0396357	Up Regulated in ART
ENSG00000169877	AHSP	protein_coding	31.3693	5.21168	1.01089	5.15552	2.52933e-07	0.000199036	Up Regulated in ART
ENSG00000091651	ORC6	protein_coding	40.0427	0.631291	0.201361	3.13512	0.00171785	0.0377884	Up Regulated in ART
ENSG00000166164	BRD7	protein_coding	2290.34	0.386216	0.094501	4.08689	4.37185e-05	0.00400041	Up Regulated in ART
ENSG00000125148	MT2A	protein_coding	654.202	0.900391	0.29785	3.02297	0.00250305	0.0474101	Up Regulated in ART
ENSG00000169715	MT1E	protein_coding	80.376	1.35413	0.398713	3.39625	0.000683154	0.0224844	Up Regulated in ART
ENSG00000140853	NLRC5	protein_coding	10135.6	0.395989	0.128074	3.09187	0.00198898	0.0411002	Up Regulated in ART
ENSG00000089505	CMTM1	protein_coding	20.8366	-0.989596	0.317996	-3.11197	0.0018584	0.0397194	Down Regulated in ART
ENSG00000172824	CES4A	protein_coding	282.051	0.575853	0.144861	3.9752	7.03189e-05	0.00529201	Up Regulated in ART
ENSG00000102878	HSF4	protein_coding	135.638	0.765184	0.180617	4.23649	2.27038e-05	0.00251954	Up Regulated in ART
ENSG00000196123	KIAA0895L	protein_coding	194.88	0.628406	0.18557	3.38636	0.000708258	0.0229118	Up Regulated in ART
ENSG00000135723	FHOD1	protein_coding	1142.3	0.497963	0.140626	3.54106	0.000398527	0.0160149	Up Regulated in ART
ENSG00000261884	AC040162.1	protein_coding	239.688	0.584268	0.17101	3.41657	0.000634149	0.0216536	Up Regulated in ART
ENSG00000103066	PLA2G15	protein_coding	352.728	0.490423	0.150025	3.26894	0.00107951	0.0288596	Up Regulated in ART
ENSG00000132612	VPS4A	protein_coding	1188.49	0.366166	0.0717158	5.10579	3.29409e-07	0.000211212	Up Regulated in ART
ENSG00000103018	CYB5B	protein_coding	1124.97	-0.37518	0.110245	-3.40314	0.00066616	0.0222656	Down Regulated in ART
ENSG00000166747	AP1G1	protein_coding	2176.53	0.432861	0.141682	3.05516	0.0022494	0.0441015	Up Regulated in ART
ENSG00000182149	IST1	protein_coding	4133.75	0.41871	0.0983803	4.25603	2.08086e-05	0.0024177	Up Regulated in ART
ENSG00000277481	PKD1L3	protein_coding	3.88739	3.61757	1.00657	3.59396	0.000325687	0.0145692	Up Regulated in ART
ENSG00000140829	DHX38	protein_coding	1976.35	0.325934	0.0751509	4.33706	1.44404e-05	0.00191169	Up Regulated in ART
ENSG00000103035	PSMD7	protein_coding	2326.67	0.315809	0.0977541	3.23065	0.00123509	0.0313159	Up Regulated in ART
ENSG00000166446	CDYL2	protein_coding	502.757	0.49272	0.164403	2.99703	0.00272623	0.0497853	Up Regulated in ART
ENSG00000185669	SNAI3	protein_coding	175.952	0.963126	0.223614	4.30709	1.65417e-05	0.00206021	Up Regulated in ART
ENSG00000183688	RFLNB	protein_coding	2310.9	-0.48561	0.145669	-3.33366	0.000857105	0.0255831	Down Regulated in ART
ENSG00000174231	PRPF8	protein_coding	6942.96	0.256071	0.080958	3.16301	0.00156147	0.0358992	Up Regulated in ART
ENSG00000108963	DPH1	protein_coding	557.845	0.373535	0.122127	3.05858	0.00222391	0.0437503	Up Regulated in ART
ENSG00000141255	SPATA22	protein_coding	1.68289	-4.11514	1.00243	-4.10515	4.04047e-05	0.00382233	Down Regulated in ART
ENSG00000185722	ANKFY1	protein_coding	1714.95	0.332946	0.110764	3.0059	0.00264799	0.0488201	Up Regulated in ART
ENSG00000141503	MINK1	protein_coding	3448.81	0.373112	0.10702	3.48639	0.000489591	0.0183063	Up Regulated in ART
ENSG00000161929	SCIMP	protein_coding	1872.74	-0.693225	0.187077	-3.70556	0.000210925	0.0108031	Down Regulated in ART
ENSG00000129197	RPAIN	protein_coding	1009.02	0.295995	0.076208	3.88405	0.000102733	0.00686683	Up Regulated in ART
ENSG00000091592	NLRP1	protein_coding	9941.72	0.388169	0.113869	3.40892	0.000652213	0.022017	Up Regulated in ART
ENSG00000219200	RNASEK	protein_coding	177.992	0.630122	0.165689	3.80303	0.000142938	0.00853291	Up Regulated in ART
ENSG00000258315	C17orf49	protein_coding	77.5304	0.819797	0.155263	5.28004	1.29154e-07	0.000139365	Up Regulated in ART
ENSG00000174282	ZBTB4	protein_coding	3118.31	-0.289463	0.0929166	-3.1153	0.00183759	0.0395184	Down Regulated in ART
ENSG00000129194	SOX15	protein_coding	6.37773	1.9024	0.486955	3.90673	9.35548e-05	0.00637646	Up Regulated in ART
ENSG00000161970	RPL26	protein_coding	3046.09	0.515658	0.154557	3.33636	0.000848817	0.0254234	Up Regulated in ART
ENSG00000006695	COX10	protein_coding	518.387	-0.272884	0.0901656	-3.02647	0.00247425	0.0470189	Down Regulated in ART
ENSG00000125430	HS3ST3B1	protein_coding	315.798	-0.553495	0.168438	-3.28604	0.00101608	0.0280548	Down Regulated in ART
ENSG00000205309	NT5M	protein_coding	171.27	0.914699	0.2884	3.17163	0.00151585	0.0353671	Up Regulated in ART
ENSG00000141034	GID4	protein_coding	352.282	-0.527447	0.15902	-3.31686	0.00091036	0.0262776	Down Regulated in ART
ENSG00000128482	RNF112	protein_coding	19.2531	1.24377	0.317841	3.91318	9.10868e-05	0.0062433	Up Regulated in ART
ENSG00000109103	UNC119	protein_coding	2143.87	0.457463	0.147612	3.0991	0.00194111	0.0407084	Up Regulated in ART
ENSG00000076382	SPAG5	protein_coding	142.213	0.654627	0.15051	4.3494	1.36508e-05	0.00187558	Up Regulated in ART
ENSG00000167524	RSKR	protein_coding	149.3	0.477416	0.153028	3.1198	0.00180972	0.0391623	Up Regulated in ART
ENSG00000109113	RAB34	protein_coding	665.056	0.602894	0.1855	3.25011	0.00115362	0.0302018	Up Regulated in ART
ENSG00000176390	CRLF3	protein_coding	2022.72	-0.355666	0.100067	-3.55428	0.000379012	0.0157727	Down Regulated in ART
ENSG00000126860	EVI2A	protein_coding	2043.13	-0.658647	0.15704	-4.19413	2.73925e-05	0.00289158	Down Regulated in ART
ENSG00000172301	COPRS	protein_coding	204.684	0.44737	0.109994	4.06722	4.75772e-05	0.00426765	Up Regulated in ART
ENSG00000178691	SUZ12	protein_coding	1612.89	-0.40609	0.125968	-3.22375	0.00126522	0.0317442	Down Regulated in ART
ENSG00000126858	RHOT1	protein_coding	1675.58	-0.397691	0.112027	-3.54994	0.000385315	0.0159531	Down Regulated in ART
ENSG00000108691	CCL2	protein_coding	27.0726	1.66257	0.536309	3.10002	0.00193507	0.0407084	Up Regulated in ART
ENSG00000278259	MYO19	protein_coding	797.468	0.371843	0.103723	3.58495	0.000337137	0.0148488	Up Regulated in ART
ENSG00000125686	MED1	protein_coding	1956.25	-0.439207	0.0986485	-4.45225	8.49768e-06	0.00142827	Down Regulated in ART
ENSG00000073605	GSDMB	protein_coding	651.011	0.697159	0.176627	3.94707	7.91144e-05	0.0056831	Up Regulated in ART
ENSG00000094804	CDC6	protein_coding	44.7163	0.906499	0.286505	3.16399	0.00155622	0.035874	Up Regulated in ART
ENSG00000108774	RAB5C	protein_coding	1226.46	0.332469	0.108367	3.06798	0.00215512	0.042908	Up Regulated in ART
ENSG00000108799	EZH1	protein_coding	2487.09	0.344268	0.0708038	4.86228	1.16039e-06	0.000418515	Up Regulated in ART
ENSG00000188554	NBR1	protein_coding	3259.6	-0.423772	0.0953148	-4.44602	8.74752e-06	0.00145488	Down Regulated in ART
ENSG00000067596	DHX8	protein_coding	1906.7	0.34736	0.108988	3.18714	0.00143689	0.0343864	Up Regulated in ART
ENSG00000125319	C17orf53	protein_coding	17.5853	0.721316	0.236324	3.05223	0.00227145	0.0442896	Up Regulated in ART
ENSG00000004939	SLC4A1	protein_coding	105.137	4.8789	1.05106	4.64188	3.4526e-06	0.000796951	Up Regulated in ART
ENSG00000108465	CDK5RAP3	protein_coding	816.654	0.550979	0.147447	3.73679	0.000186387	0.00991769	Up Regulated in ART
ENSG00000108468	CBX1	protein_coding	1022.26	-0.379499	0.115727	-3.27925	0.00104082	0.0285557	Down Regulated in ART
ENSG00000121073	SLC35B1	protein_coding	916.771	0.284996	0.0937045	3.04144	0.00235453	0.0453915	Up Regulated in ART
ENSG00000167107	ACSF2	protein_coding	451.012	0.258117	0.0851564	3.03109	0.00243674	0.0466647	Up Regulated in ART
ENSG00000108848	LUC7L3	protein_coding	3158.89	0.647433	0.147208	4.39809	1.09206e-05	0.00164398	Up Regulated in ART
ENSG00000167117	ANKRD40CL	protein_coding	0.296963	20.2067	4.14593	4.87388	1.09427e-06	0.000406787	Up Regulated in ART
ENSG00000166260	COX11	protein_coding	724.91	-0.447418	0.13612	-3.28693	0.00101287	0.0280109	Down Regulated in ART
ENSG00000121060	TRIM25	protein_coding	2427.91	0.450038	0.143063	3.14574	0.00165666	0.0371024	Up Regulated in ART
ENSG00000108375	RNF43	protein_coding	22.9091	0.764591	0.228361	3.34817	0.00081348	0.0247504	Up Regulated in ART
ENSG00000068097	HEATR6	protein_coding	505.179	0.411439	0.102817	4.00165	6.29017e-05	0.00496543	Up Regulated in ART
ENSG00000062725	APPBP2	protein_coding	814.869	-0.374489	0.102619	-3.64931	0.000262946	0.0124375	Down Regulated in ART
ENSG00000136463	TACO1	protein_coding	329.209	0.487886	0.12177	4.00663	6.15925e-05	0.00489123	Up Regulated in ART
ENSG00000108654	DDX5	protein_coding	48598.3	0.234638	0.0756837	3.10024	0.00193362	0.0407084	Up Regulated in ART
ENSG00000108950	FAM20A	protein_coding	42.8341	1.60866	0.45417	3.54198	0.000397139	0.0160149	Up Regulated in ART
ENSG00000166685	COG1	protein_coding	898.55	0.363522	0.0834245	4.3575	1.31559e-05	0.00185167	Up Regulated in ART
ENSG00000188612	SUMO2	protein_coding	3321.91	-0.241028	0.0671418	-3.58984	0.000330884	0.0147128	Down Regulated in ART
ENSG00000125450	NUP85	protein_coding	1225.1	0.630391	0.101511	6.21008	5.29574e-10	4.58399e-06	Up Regulated in ART
ENSG00000125447	GGA3	protein_coding	2193.9	0.260934	0.0795247	3.28117	0.00103378	0.0284528	Up Regulated in ART
ENSG00000259120	SMIM6	protein_coding	4.64785	-1.89049	0.578431	-3.2683	0.00108195	0.0288596	Down Regulated in ART
ENSG00000161526	SAP30BP	protein_coding	1833.8	0.389865	0.0865779	4.50305	6.69836e-06	0.00119421	Up Regulated in ART
ENSG00000204316	MRPL38	protein_coding	160.872	0.569778	0.164696	3.45958	0.000541021	0.0195257	Up Regulated in ART
ENSG00000108669	CYTH1	protein_coding	8898.07	0.247006	0.0754376	3.27431	0.0010592	0.0286731	Up Regulated in ART
ENSG00000167302	TEPSIN	protein_coding	1395.33	0.473098	0.146602	3.22709	0.00125056	0.0315133	Up Regulated in ART
ENSG00000187531	SIRT7	protein_coding	1314.72	0.521491	0.145675	3.57984	0.000343811	0.0149926	Up Regulated in ART
ENSG00000141551	CSNK1D	protein_coding	3449.21	0.270358	0.0834462	3.23991	0.00119569	0.0307215	Up Regulated in ART
ENSG00000101577	LPIN2	protein_coding	3032	-0.316571	0.0941489	-3.36244	0.000772557	0.0241417	Down Regulated in ART
ENSG00000017797	RALBP1	protein_coding	1620.53	-0.419751	0.098616	-4.25642	2.07727e-05	0.0024177	Down Regulated in ART
ENSG00000141452	RMC1	protein_coding	1107.41	0.392975	0.0719893	5.4588	4.79358e-08	7.17293e-05	Up Regulated in ART
ENSG00000154059	IMPACT	protein_coding	580.311	-0.42686	0.113238	-3.76959	0.000163518	0.00925107	Down Regulated in ART
ENSG00000046604	DSG2	protein_coding	7.69675	-1.66098	0.391048	-4.2475	2.16171e-05	0.00246208	Down Regulated in ART
ENSG00000197705	KLHL14	protein_coding	105.446	1.17048	0.351632	3.3287	0.000872536	0.0258211	Up Regulated in ART
ENSG00000141428	C18orf21	protein_coding	396.29	0.351933	0.114393	3.07651	0.00209437	0.0422815	Up Regulated in ART
ENSG00000141424	SLC39A6	protein_coding	924.901	-0.375731	0.117565	-3.19595	0.00139369	0.0337921	Down Regulated in ART
ENSG00000082212	ME2	protein_coding	1797.97	-0.345956	0.0877059	-3.9445	7.99666e-05	0.00569704	Down Regulated in ART
ENSG00000176641	RNF152	protein_coding	9.121	1.74312	0.576972	3.02115	0.00251813	0.0474868	Up Regulated in ART
ENSG00000197563	PIGN	protein_coding	359.759	-0.384143	0.117318	-3.27438	0.00105895	0.0286731	Down Regulated in ART
ENSG00000196476	C20orf96	protein_coding	123.02	0.588016	0.177041	3.32136	0.000895806	0.0261963	Up Regulated in ART
ENSG00000125834	STK35	protein_coding	652.091	0.358047	0.0849437	4.21511	2.49655e-05	0.00271826	Up Regulated in ART
ENSG00000088827	SIGLEC1	protein_coding	756.7	2.75542	0.571057	4.82513	1.39914e-06	0.000474941	Up Regulated in ART
ENSG00000088826	SMOX	protein_coding	514.736	0.983	0.295793	3.32327	0.000889685	0.0261148	Up Regulated in ART
ENSG00000182621	PLCB1	protein_coding	394.912	-0.997507	0.225824	-4.41719	9.99945e-06	0.00153645	Down Regulated in ART
ENSG00000125863	MKKS	protein_coding	417.225	-0.950068	0.207623	-4.57594	4.74086e-06	0.000965575	Down Regulated in ART
ENSG00000089048	ESF1	protein_coding	372.187	-0.37281	0.111054	-3.35701	0.000787908	0.0242709	Down Regulated in ART
ENSG00000101247	NDUFAF5	protein_coding	319.876	0.62763	0.149924	4.18633	2.835e-05	0.0029566	Up Regulated in ART
ENSG00000089177	KIF16B	protein_coding	290.776	-0.526735	0.164419	-3.20361	0.00135716	0.0332322	Down Regulated in ART
ENSG00000132664	POLR3F	protein_coding	300.363	0.340446	0.105086	3.2397	0.00119657	0.0307215	Up Regulated in ART
ENSG00000089050	RBBP9	protein_coding	300.508	-0.522349	0.152108	-3.43406	0.000594616	0.020804	Down Regulated in ART
ENSG00000101346	POFUT1	protein_coding	1052.88	-0.36278	0.0822524	-4.41057	1.03098e-05	0.00156564	Down Regulated in ART
ENSG00000171456	ASXL1	protein_coding	3514.74	0.393227	0.0846382	4.64597	3.38486e-06	0.000791873	Up Regulated in ART
ENSG00000101391	CDK5RAP1	protein_coding	1035.01	0.276133	0.0806603	3.4234	0.000618428	0.0213961	Up Regulated in ART
ENSG00000101412	E2F1	protein_coding	154.152	0.708761	0.218601	3.24225	0.00118589	0.0307215	Up Regulated in ART
ENSG00000101440	ASIP	protein_coding	4.00846	-2.0806	0.631544	-3.29446	0.00098611	0.0276686	Down Regulated in ART
ENSG00000100991	TRPC4AP	protein_coding	3332.45	0.231355	0.0764684	3.0255	0.0024822	0.0471182	Up Regulated in ART
ENSG00000131043	AAR2	protein_coding	941.369	0.370928	0.112083	3.3094	0.000934969	0.0267983	Up Regulated in ART
ENSG00000101084	RAB5IF	protein_coding	102.488	0.608071	0.188225	3.23056	0.00123549	0.0313159	Up Regulated in ART
ENSG00000101413	RPRD1B	protein_coding	353.337	0.40484	0.108729	3.72339	0.000196562	0.0102496	Up Regulated in ART
ENSG00000185513	L3MBTL1	protein_coding	262.366	0.404288	0.120315	3.36025	0.000778718	0.0241621	Up Regulated in ART
ENSG00000132824	SERINC3	protein_coding	2602.29	-0.435478	0.114927	-3.78916	0.000151159	0.00881099	Down Regulated in ART
ENSG00000100982	PCIF1	protein_coding	1449.41	0.275398	0.0843363	3.26547	0.00109282	0.0290168	Up Regulated in ART
ENSG00000062598	ELMO2	protein_coding	1675.33	0.226012	0.0637878	3.54319	0.00039532	0.0160149	Up Regulated in ART
ENSG00000101040	ZMYND8	protein_coding	939.707	0.27181	0.0777192	3.49734	0.000469929	0.0179446	Up Regulated in ART
ENSG00000124201	ZNFX1	protein_coding	2406.57	0.448417	0.112832	3.97421	7.06131e-05	0.00529201	Up Regulated in ART
ENSG00000124103	FAM209A	protein_coding	49.996	0.625657	0.18148	3.44753	0.000565742	0.0201111	Up Regulated in ART
ENSG00000101146	RAE1	protein_coding	887.401	0.38959	0.106029	3.67437	0.000238434	0.0117354	Up Regulated in ART
ENSG00000124256	ZBP1	protein_coding	892.113	0.661325	0.144255	4.5844	4.55294e-06	0.000938339	Up Regulated in ART
ENSG00000215440	NPEPL1	protein_coding	373.773	0.607899	0.174032	3.49303	0.000477579	0.0180573	Up Regulated in ART
ENSG00000087460	GNAS	protein_coding	22387.8	0.250311	0.076703	3.26337	0.00110094	0.0291429	Up Regulated in ART
ENSG00000101158	NELFCD	protein_coding	1809.09	0.221914	0.0654634	3.38989	0.000699204	0.0228389	Up Regulated in ART
ENSG00000179242	CDH4	protein_coding	5.66377	-2.21098	0.668483	-3.30746	0.000941454	0.0268508	Down Regulated in ART
ENSG00000101187	SLCO4A1	protein_coding	15.6742	1.07857	0.353679	3.04958	0.0022916	0.0445255	Up Regulated in ART
ENSG00000101191	DIDO1	protein_coding	2248.44	0.282665	0.084781	3.33406	0.000855889	0.0255831	Up Regulated in ART
ENSG00000101194	SLC17A9	protein_coding	461.179	0.654488	0.206542	3.16879	0.00153076	0.0355711	Up Regulated in ART
ENSG00000129946	SHC2	protein_coding	11.4169	1.85641	0.530731	3.49783	0.000469058	0.0179446	Up Regulated in ART
ENSG00000105426	PTPRS	protein_coding	114.258	-1.25953	0.223127	-5.64493	1.6525e-08	3.17867e-05	Down Regulated in ART
ENSG00000229833	PET100	protein_coding	236.427	0.722789	0.151062	4.78473	1.71219e-06	0.000520024	Up Regulated in ART
ENSG00000066044	ELAVL1	protein_coding	896.265	-0.287789	0.0915434	-3.14374	0.00166801	0.0373082	Down Regulated in ART
ENSG00000105088	OLFM2	protein_coding	46.6398	-1.12534	0.278314	-4.04342	5.26762e-05	0.00452195	Down Regulated in ART
ENSG00000129355	CDKN2D	protein_coding	3249.89	0.651358	0.167653	3.88515	0.000102267	0.0068622	Up Regulated in ART
ENSG00000130176	CNN1	protein_coding	6.68056	2.32554	0.596577	3.89813	9.69372e-05	0.00658109	Up Regulated in ART
ENSG00000095059	DHPS	protein_coding	208.664	0.692728	0.158453	4.37182	1.23215e-05	0.00178235	Up Regulated in ART
ENSG00000132026	RTBDN	protein_coding	0.295867	18.7535	4.14951	4.51943	6.20051e-06	0.00114745	Up Regulated in ART
ENSG00000141854	MISP3	protein_coding	82.5799	0.925828	0.288991	3.20366	0.00135695	0.0332322	Up Regulated in ART
ENSG00000123136	DDX39A	protein_coding	2494.52	0.518493	0.151184	3.42955	0.000604582	0.021087	Up Regulated in ART
ENSG00000131355	ADGRE3	protein_coding	299.169	-1.0669	0.281776	-3.78634	0.000152884	0.0088664	Down Regulated in ART
ENSG00000105127	AKAP8	protein_coding	1504.95	0.353813	0.111544	3.17196	0.00151413	0.0353671	Up Regulated in ART
ENSG00000196684	HSH2D	protein_coding	2031.69	0.678461	0.14562	4.65911	3.17583e-06	0.000753149	Up Regulated in ART
ENSG00000130479	MAP1S	protein_coding	296.59	0.65229	0.211411	3.08542	0.00203268	0.0415954	Up Regulated in ART
ENSG00000064607	SUGP2	protein_coding	3889.39	0.451415	0.111149	4.06133	4.87936e-05	0.00430977	Up Regulated in ART
ENSG00000186010	NDUFA13	protein_coding	25.1357	1.0355	0.281615	3.67701	0.000235983	0.0116724	Up Regulated in ART
ENSG00000064547	LPAR2	protein_coding	867.56	0.588663	0.166556	3.53433	0.000408808	0.0161951	Up Regulated in ART
ENSG00000213988	ZNF90	protein_coding	45.1523	-0.817285	0.224453	-3.64124	0.000271331	0.0126954	Down Regulated in ART
ENSG00000105173	CCNE1	protein_coding	85.8883	0.969434	0.209485	4.62771	3.69738e-06	0.000820629	Up Regulated in ART
ENSG00000105697	HAMP	protein_coding	6.5569	2.09053	0.602221	3.47137	0.000517803	0.0189675	Up Regulated in ART
ENSG00000126266	FFAR1	protein_coding	17.2878	1.68228	0.531123	3.16739	0.00153813	0.0356601	Up Regulated in ART
ENSG00000167604	AD000864.1	protein_coding	509.302	0.921396	0.188379	4.89118	1.00232e-06	0.00039719	Up Regulated in ART
ENSG00000239382	ALKBH6	protein_coding	105.085	0.46371	0.147213	3.14992	0.00163317	0.0367168	Up Regulated in ART
ENSG00000167635	ZNF146	protein_coding	1778.41	-0.453794	0.145729	-3.11395	0.00184598	0.0396357	Down Regulated in ART
ENSG00000254004	ZNF260	protein_coding	214.631	-0.550323	0.174324	-3.15689	0.00159462	0.0362222	Down Regulated in ART
ENSG00000187994	RINL	protein_coding	899.54	-0.409845	0.124972	-3.27949	0.00103993	0.0285557	Down Regulated in ART
ENSG00000196235	SUPT5H	protein_coding	4121.41	0.256748	0.0814405	3.15258	0.00161833	0.0365275	Up Regulated in ART
ENSG00000160396	HIPK4	protein_coding	1.82456	3.31719	0.935073	3.54752	0.000388875	0.0159531	Up Regulated in ART
ENSG00000167378	IRGQ	protein_coding	308.757	0.635509	0.211182	3.0093	0.00261852	0.0485352	Up Regulated in ART
ENSG00000131115	ZNF227	protein_coding	426.23	-0.388496	0.101033	-3.84526	0.000120425	0.00755363	Down Regulated in ART
ENSG00000125741	OPA3	protein_coding	344.348	-0.359221	0.108743	-3.30338	0.000955254	0.0270218	Down Regulated in ART
ENSG00000010310	GIPR	protein_coding	128.871	0.86267	0.181258	4.75934	1.94229e-06	0.000560381	Up Regulated in ART
ENSG00000160013	PTGIR	protein_coding	262.954	0.738863	0.208237	3.54818	0.000387907	0.0159531	Up Regulated in ART
ENSG00000130749	AC008755.1	protein_coding	771.499	-0.398615	0.114122	-3.49288	0.000477835	0.0180573	Down Regulated in ART
ENSG00000105507	CABP5	protein_coding	141.362	1.24703	0.389863	3.19863	0.00138083	0.0336216	Up Regulated in ART
ENSG00000126458	RRAS	protein_coding	551.309	0.67762	0.204291	3.31694	0.000910102	0.0262776	Up Regulated in ART
ENSG00000104973	MED25	protein_coding	857.73	0.334813	0.106687	3.13828	0.00169943	0.0377026	Up Regulated in ART
ENSG00000187474	FPR3	protein_coding	75.8811	-1.36712	0.340279	-4.01764	5.8783e-05	0.00482299	Down Regulated in ART
ENSG00000197497	ZNF665	protein_coding	64.7995	-0.687233	0.170501	-4.03068	5.56166e-05	0.00469676	Down Regulated in ART
ENSG00000197928	ZNF677	protein_coding	131.727	-0.667276	0.214157	-3.11583	0.00183426	0.039496	Down Regulated in ART
ENSG00000167613	LAIR1	protein_coding	2487.65	-0.417457	0.12072	-3.45806	0.000544077	0.0195823	Down Regulated in ART
ENSG00000167615	LENG8	protein_coding	6356.96	0.700607	0.177547	3.94604	7.94559e-05	0.00568405	Up Regulated in ART
ENSG00000218891	ZNF579	protein_coding	61.4297	0.587994	0.165401	3.55496	0.000378043	0.0157703	Up Regulated in ART
ENSG00000213015	ZNF580	protein_coding	409.384	0.385131	0.110492	3.48562	0.000491004	0.0183195	Up Regulated in ART
ENSG00000178229	ZNF543	protein_coding	72.1802	-0.508067	0.165461	-3.07062	0.00213614	0.0427704	Down Regulated in ART
ENSG00000099326	MZF1	protein_coding	457.574	0.432068	0.119997	3.60065	0.000317418	0.0143102	Up Regulated in ART
ENSG00000099968	BCL2L13	protein_coding	1807.04	-0.378616	0.0800344	-4.73067	2.23777e-06	0.000608408	Down Regulated in ART
ENSG00000070010	UFD1	protein_coding	1744.07	0.465282	0.0809805	5.74561	9.15923e-09	3.17867e-05	Up Regulated in ART
ENSG00000099949	LZTR1	protein_coding	503.782	0.482042	0.13806	3.49153	0.000480257	0.0180744	Up Regulated in ART
ENSG00000138867	GUCD1	protein_coding	2473.05	0.391883	0.0991089	3.95406	7.68364e-05	0.00561262	Up Regulated in ART
ENSG00000100028	SNRPD3	protein_coding	1076.92	-0.333022	0.091716	-3.63101	0.000282311	0.0131735	Down Regulated in ART
ENSG00000133454	MYO18B	protein_coding	7.6301	-2.86616	0.845413	-3.39025	0.000698302	0.0228389	Down Regulated in ART
ENSG00000100109	TFIP11	protein_coding	1156.35	0.404158	0.101136	3.99616	6.43777e-05	0.00502326	Up Regulated in ART
ENSG00000183579	ZNRF3	protein_coding	23.5918	-0.849821	0.258349	-3.28943	0.00100392	0.0279355	Down Regulated in ART
ENSG00000182944	EWSR1	protein_coding	6418.59	0.233669	0.063775	3.66395	0.000248355	0.0120914	Up Regulated in ART
ENSG00000100225	FBXO7	protein_coding	3730.42	0.32277	0.101481	3.1806	0.00146971	0.0348782	Up Regulated in ART
ENSG00000100360	IFT27	protein_coding	391.898	0.346308	0.114708	3.01904	0.00253576	0.0476645	Up Regulated in ART
ENSG00000273899	NOL12	protein_coding	100.921	0.577775	0.157626	3.66549	0.000246868	0.0120914	Up Regulated in ART
ENSG00000213923	CSNK1E	protein_coding	870.834	0.380529	0.124318	3.06092	0.00220655	0.0435574	Up Regulated in ART
ENSG00000100226	GTPBP1	protein_coding	1580.65	0.428946	0.128521	3.33755	0.000845192	0.0253587	Up Regulated in ART
ENSG00000100359	SGSM3	protein_coding	64.8068	0.761498	0.208871	3.64579	0.000266575	0.0125406	Up Regulated in ART
ENSG00000183864	TOB2	protein_coding	885.883	-0.494556	0.113997	-4.33832	1.43573e-05	0.00191169	Down Regulated in ART
ENSG00000100413	POLR3H	protein_coding	702.24	-0.366079	0.100534	-3.64133	0.000271236	0.0126954	Down Regulated in ART
ENSG00000100416	TRMU	protein_coding	738.459	0.440104	0.111145	3.95973	7.50341e-05	0.00552762	Up Regulated in ART
ENSG00000100429	HDAC10	protein_coding	48.2661	0.719226	0.229265	3.13709	0.00170634	0.0377026	Up Regulated in ART
ENSG00000177989	ODF3B	protein_coding	671.197	1.00277	0.331903	3.02127	0.00251713	0.0474868	Up Regulated in ART
ENSG00000205560	CPT1B	protein_coding	29.7445	0.737364	0.244316	3.01807	0.00254387	0.0477651	Up Regulated in ART
ENSG00000100288	CHKB	protein_coding	80.08	0.720392	0.179501	4.01331	5.9874e-05	0.00483707	Up Regulated in ART
ENSG00000251322	SHANK3	protein_coding	3.6282	1.98755	0.643762	3.08741	0.00201911	0.0414648	Up Regulated in ART
ENSG00000154642	C21orf91	protein_coding	664.08	-0.516607	0.163146	-3.16653	0.00154269	0.0357045	Down Regulated in ART
ENSG00000166265	CYYR1	protein_coding	10.736	-1.76774	0.517808	-3.41389	0.00064043	0.0217395	Down Regulated in ART
ENSG00000159055	MIS18A	protein_coding	110.29	-0.391618	0.120247	-3.25677	0.00112687	0.0296301	Down Regulated in ART
ENSG00000184787	UBE2G2	protein_coding	3397.79	0.175433	0.055025	3.18825	0.00143136	0.0343209	Up Regulated in ART
ENSG00000160294	MCM3AP	protein_coding	3129.5	0.269136	0.0621084	4.33334	1.46866e-05	0.00191169	Up Regulated in ART
ENSG00000198804	MT-CO1	protein_coding	437939	0.664547	0.193791	3.42919	0.000605375	0.021087	Up Regulated in ART
ENSG00000198938	MT-CO3	protein_coding	213805	0.659954	0.203481	3.24331	0.00118148	0.0307114	Up Regulated in ART

## Sheet: VP_vs_ART
ID	GeneName	BioType	baseMean	log2FoldChange	lfcSE	stat	pvalue	padj	Significance
ENSG00000187608	ISG15	protein_coding	704.623	2.29057	0.55464	4.12983	3.6303e-05	0.0148255	Up Regulated in ART
ENSG00000078808	SDF4	protein_coding	1826.31	0.705169	0.188817	3.73466	0.00018797	0.0261097	Up Regulated in ART
ENSG00000169972	PUSL1	protein_coding	101.398	1.26123	0.365943	3.44653	0.000567842	0.0390803	Up Regulated in ART
ENSG00000224051	CPTP	protein_coding	124.35	1.22525	0.342548	3.57687	0.000347739	0.0317762	Up Regulated in ART
ENSG00000175756	AURKAIP1	protein_coding	569.123	1.15222	0.299109	3.85216	0.000117079	0.0220286	Up Regulated in ART
ENSG00000078900	TP73	protein_coding	10.0418	2.29122	0.689028	3.3253	0.000883245	0.0448357	Up Regulated in ART
ENSG00000171621	SPSB1	protein_coding	84.416	1.22636	0.294083	4.17013	3.04424e-05	0.0139234	Up Regulated in ART
ENSG00000116685	KIAA2013	protein_coding	1207.31	0.829954	0.186067	4.46051	8.17655e-06	0.00786311	Up Regulated in ART
ENSG00000120949	TNFRSF8	protein_coding	200.364	1.67626	0.382172	4.38613	1.15386e-05	0.00951111	Up Regulated in ART
ENSG00000159423	ALDH4A1	protein_coding	67.671	1.01012	0.270529	3.73389	0.000188545	0.0261097	Up Regulated in ART
ENSG00000117308	GALE	protein_coding	191.013	0.785628	0.238784	3.29012	0.00100144	0.0467879	Up Regulated in ART
ENSG00000142684	ZNF593	protein_coding	85.757	1.36883	0.354534	3.86091	0.000112966	0.0220224	Up Regulated in ART
ENSG00000186501	TMEM222	protein_coding	681.75	0.652127	0.199057	3.27608	0.0010526	0.0481282	Up Regulated in ART
ENSG00000126709	IFI6	protein_coding	1291.9	1.78354	0.525192	3.39598	0.000683838	0.0418296	Up Regulated in ART
ENSG00000160050	CCDC28B	protein_coding	93.9374	1.31489	0.35896	3.66307	0.000249215	0.0282479	Up Regulated in ART
ENSG00000020129	NCDN	protein_coding	315.812	0.92759	0.267993	3.46125	0.000537678	0.0386302	Up Regulated in ART
ENSG00000126070	AGO3	protein_coding	830.519	-0.636077	0.191882	-3.31493	0.00091665	0.0457344	Down Regulated in ART
ENSG00000142694	EVA1B	protein_coding	29.3547	2.01485	0.618303	3.25867	0.00111934	0.0499377	Up Regulated in ART
ENSG00000181817	LSM10	protein_coding	801.508	0.816404	0.228106	3.57906	0.000344839	0.0317762	Up Regulated in ART
ENSG00000163879	DNALI1	protein_coding	1.55218	-3.5737	1.07674	-3.31899	0.000903436	0.0453419	Down Regulated in ART
ENSG00000117395	EBNA1BP2	protein_coding	569.052	0.515865	0.154904	3.33023	0.000867732	0.0446071	Up Regulated in ART
ENSG00000117411	B4GALT2	protein_coding	56.4124	1.10715	0.330905	3.34581	0.000820423	0.0439676	Up Regulated in ART
ENSG00000159214	CCDC24	protein_coding	48.6429	1.45225	0.349245	4.15827	3.20671e-05	0.0142329	Up Regulated in ART
ENSG00000162368	CMPK1	protein_coding	4506.33	-0.703886	0.213564	-3.29591	0.000981044	0.0462782	Down Regulated in ART
ENSG00000155366	RHOC	protein_coding	930.625	1.12988	0.279261	4.04597	5.21064e-05	0.0163993	Up Regulated in ART
ENSG00000009307	CSDE1	protein_coding	13563.3	-0.469108	0.129883	-3.61179	0.000304096	0.0304272	Down Regulated in ART
ENSG00000265491	RNF115	protein_coding	1053	-0.541595	0.154177	-3.51282	0.000443376	0.0358637	Down Regulated in ART
ENSG00000143303	RRNAD1	protein_coding	439.957	0.54621	0.157052	3.47789	0.000505378	0.0382953	Up Regulated in ART
ENSG00000213088	ACKR1	protein_coding	0.188817	-23.1932	5.9822	-3.87704	0.000105736	0.0215328	Down Regulated in ART
ENSG00000158716	DUSP23	protein_coding	197.035	0.917099	0.257839	3.55686	0.00037531	0.0321492	Up Regulated in ART
ENSG00000198625	MDM4	protein_coding	2622.72	-0.651978	0.193021	-3.37776	0.000730787	0.0426232	Down Regulated in ART
ENSG00000162923	WDR26	protein_coding	5290.58	-0.466168	0.133185	-3.50015	0.000464988	0.0366379	Down Regulated in ART
ENSG00000143801	PSEN2	protein_coding	158.077	0.672159	0.190737	3.524	0.000425077	0.0347079	Up Regulated in ART
ENSG00000168159	RNF187	protein_coding	1433.11	0.596505	0.132211	4.51178	6.42863e-06	0.00679082	Up Regulated in ART
ENSG00000171161	ZNF672	protein_coding	465.878	0.531498	0.146804	3.62045	0.000294092	0.0303258	Up Regulated in ART
ENSG00000143952	VPS54	protein_coding	917.001	-0.426545	0.126442	-3.37344	0.000742344	0.0426232	Down Regulated in ART
ENSG00000135617	PRADC1	protein_coding	202.093	0.660041	0.199536	3.30788	0.000940046	0.0460329	Up Regulated in ART
ENSG00000273155	AC092587.1	protein_coding	0.395834	-17.4038	3.77866	-4.60582	4.10837e-06	0.00670328	Down Regulated in ART
ENSG00000125611	CHCHD5	protein_coding	180.968	1.03048	0.272155	3.78638	0.000152857	0.0249973	Up Regulated in ART
ENSG00000048991	R3HDM1	protein_coding	968.446	-0.32998	0.0927765	-3.55671	0.000375521	0.0321492	Down Regulated in ART
ENSG00000196504	PRPF40A	protein_coding	2314.6	-0.457358	0.128402	-3.56193	0.000368141	0.0321492	Down Regulated in ART
ENSG00000115524	SF3B1	protein_coding	17545.8	-0.467936	0.137098	-3.41315	0.000642172	0.0407179	Down Regulated in ART
ENSG00000178074	C2orf69	protein_coding	520.566	-0.734248	0.20958	-3.50343	0.000459304	0.0364704	Down Regulated in ART
ENSG00000114933	INO80D	protein_coding	953.558	-0.658587	0.198984	-3.30975	0.0009338	0.0460329	Down Regulated in ART
ENSG00000118246	FASTKD2	protein_coding	613.839	-0.460545	0.12827	-3.59045	0.000330112	0.0310556	Down Regulated in ART
ENSG00000127837	AAMP	protein_coding	1403.93	0.543429	0.161869	3.35721	0.000787328	0.0432655	Up Regulated in ART
ENSG00000144579	CTDSP1	protein_coding	3783.8	0.610493	0.13277	4.59813	4.2629e-06	0.00670328	Up Regulated in ART
ENSG00000115649	CNPPD1	protein_coding	2053.21	0.421351	0.12794	3.29336	0.000989983	0.0465669	Up Regulated in ART
ENSG00000204104	TRAF3IP1	protein_coding	203.895	-0.516588	0.144776	-3.56819	0.00035946	0.0319219	Down Regulated in ART
ENSG00000188389	PDCD1	protein_coding	102.418	2.32074	0.547622	4.23785	2.25669e-05	0.0130577	Up Regulated in ART
ENSG00000188011	RTP5	protein_coding	44.86	2.60155	0.766009	3.39624	0.000683188	0.0418296	Up Regulated in ART
ENSG00000171148	TADA3	protein_coding	1892.89	0.55525	0.154514	3.59352	0.000326237	0.0309342	Up Regulated in ART
ENSG00000163807	KIAA1143	protein_coding	860.225	-0.49655	0.147105	-3.37548	0.000736863	0.0426232	Down Regulated in ART
ENSG00000164054	SHISA5	protein_coding	4131.39	0.728103	0.167495	4.34702	1.38e-05	0.00985767	Up Regulated in ART
ENSG00000225697	SLC26A6	protein_coding	697.619	0.667758	0.162501	4.10926	3.96924e-05	0.0152156	Up Regulated in ART
ENSG00000114302	PRKAR2A	protein_coding	1355.34	-0.554683	0.157898	-3.51293	0.000443193	0.0358637	Down Regulated in ART
ENSG00000173402	DAG1	protein_coding	491.573	0.431037	0.110886	3.88722	0.000101401	0.0214349	Up Regulated in ART
ENSG00000114395	CYB561D2	protein_coding	534.77	0.731604	0.188224	3.88688	0.00010154	0.0214349	Up Regulated in ART
ENSG00000126062	TMEM115	protein_coding	346.56	0.944024	0.194833	4.84529	1.26425e-06	0.00364735	Up Regulated in ART
ENSG00000164081	TEX264	protein_coding	1090.27	0.73389	0.169503	4.32967	1.49333e-05	0.00994212	Up Regulated in ART
ENSG00000247596	TWF2	protein_coding	829.908	1.37249	0.335373	4.09241	4.26904e-05	0.015219	Up Regulated in ART
ENSG00000184897	H1FX	protein_coding	1475.91	1.27306	0.341321	3.7298	0.000191634	0.0261196	Up Regulated in ART
ENSG00000163781	TOPBP1	protein_coding	1620.44	-0.467128	0.1365	-3.42219	0.000621191	0.0406677	Down Regulated in ART
ENSG00000152601	MBNL1	protein_coding	14290.8	-0.532893	0.141937	-3.75444	0.000173731	0.0249973	Down Regulated in ART
ENSG00000198836	OPA1	protein_coding	1417.56	-0.477807	0.133622	-3.57582	0.000349128	0.0317762	Down Regulated in ART
ENSG00000184203	PPP1R2	protein_coding	2467.59	-0.643868	0.163891	-3.92864	8.54271e-05	0.0205381	Down Regulated in ART
ENSG00000075711	DLG1	protein_coding	1276.1	-0.403028	0.120319	-3.34965	0.000809132	0.0439079	Down Regulated in ART
ENSG00000121892	PDS5A	protein_coding	3310.3	-0.453366	0.131645	-3.44384	0.000573512	0.0390846	Down Regulated in ART
ENSG00000118816	CCNI	protein_coding	9803.24	-0.565317	0.166947	-3.38621	0.000708645	0.0424451	Down Regulated in ART
ENSG00000138767	CNOT6L	protein_coding	3534.56	-0.84171	0.255018	-3.30059	0.000964819	0.0462632	Down Regulated in ART
ENSG00000242110	AMACR	protein_coding	5.49415	4.97545	1.3528	3.67789	0.000235169	0.0282344	Up Regulated in ART
ENSG00000132356	PRKAA1	protein_coding	1894.91	-0.606467	0.175402	-3.45757	0.000545061	0.0386681	Down Regulated in ART
ENSG00000153914	SREK1	protein_coding	1474.03	-0.595951	0.173989	-3.42523	0.000614288	0.0404309	Down Regulated in ART
ENSG00000172058	SERF1A	protein_coding	2.00299	15.6131	2.20233	7.08932	1.34769e-12	2.33284e-08	Up Regulated in ART
ENSG00000145743	FBXL17	protein_coding	613.663	-0.711404	0.197754	-3.59743	0.000321377	0.0309342	Down Regulated in ART
ENSG00000113328	CCNG1	protein_coding	2029.69	-0.622594	0.172127	-3.61706	0.000297966	0.0303399	Down Regulated in ART
ENSG00000037241	RPL26L1	protein_coding	213.839	0.614292	0.18716	3.28217	0.00103012	0.0476683	Up Regulated in ART
ENSG00000169223	LMAN2	protein_coding	1783.83	0.805898	0.213928	3.76715	0.000165124	0.0249973	Up Regulated in ART
ENSG00000198055	GRK6	protein_coding	3564.07	0.75551	0.210095	3.59604	0.000323101	0.0309342	Up Regulated in ART
ENSG00000169045	HNRNPH1	protein_coding	13474.4	-0.557875	0.151593	-3.68008	0.000233158	0.0282344	Down Regulated in ART
ENSG00000204642	HLA-F	protein_coding	7296.42	0.974025	0.255495	3.81231	0.000137673	0.0244831	Up Regulated in ART
ENSG00000213722	DDAH2	protein_coding	377.146	1.02375	0.27986	3.65809	0.000254106	0.0282479	Up Regulated in ART
ENSG00000204392	LSM2	protein_coding	373.558	0.671721	0.203153	3.30648	0.000944769	0.0460675	Up Regulated in ART
ENSG00000213676	ATF6B	protein_coding	2625.13	0.493761	0.148049	3.33513	0.000852605	0.0444536	Up Regulated in ART
ENSG00000240065	PSMB9	protein_coding	3000.51	0.808353	0.212995	3.79518	0.000147538	0.0249973	Up Regulated in ART
ENSG00000235863	B3GALT4	protein_coding	181.298	0.870401	0.225822	3.85437	0.00011603	0.0220286	Up Regulated in ART
ENSG00000237649	KIFC1	protein_coding	80.365	1.96888	0.479632	4.10498	4.04344e-05	0.0152156	Up Regulated in ART
ENSG00000186577	SMIM29	protein_coding	350.589	1.07399	0.237976	4.51302	6.39108e-06	0.00679082	Up Regulated in ART
ENSG00000112561	TFEB	protein_coding	719.29	0.943647	0.269148	3.50605	0.000454811	0.0362801	Up Regulated in ART
ENSG00000171462	DLK2	protein_coding	3.27294	5.1546	1.46883	3.50931	0.00044927	0.0361715	Up Regulated in ART
ENSG00000157593	SLC35B2	protein_coding	795.267	0.52487	0.158917	3.30279	0.000957264	0.0462632	Up Regulated in ART
ENSG00000178233	TMEM151B	protein_coding	0.440756	15.2247	3.50786	4.34017	1.4237e-05	0.00985767	Up Regulated in ART
ENSG00000112200	ZNF451	protein_coding	1217.6	-0.660559	0.201981	-3.27039	0.00107398	0.048419	Down Regulated in ART
ENSG00000025796	SEC63	protein_coding	1855.13	-0.461118	0.135366	-3.40645	0.00065813	0.0413354	Down Regulated in ART
ENSG00000120438	TCP1	protein_coding	2682.49	-0.358384	0.106252	-3.37297	0.000743629	0.0426232	Down Regulated in ART
ENSG00000146540	C7orf50	protein_coding	427.238	1.08877	0.300679	3.62102	0.000293448	0.0303258	Up Regulated in ART
ENSG00000106268	NUDT1	protein_coding	246.215	1.03452	0.258319	4.00483	6.20611e-05	0.0179661	Up Regulated in ART
ENSG00000106266	SNX8	protein_coding	226.628	0.798349	0.237534	3.36099	0.000776631	0.043106	Up Regulated in ART
ENSG00000106003	LFNG	protein_coding	987.725	1.33711	0.269668	4.95838	7.10851e-07	0.00246097	Up Regulated in ART
ENSG00000242802	AP5Z1	protein_coding	744.702	1.07488	0.323134	3.32642	0.000879679	0.044786	Up Regulated in ART
ENSG00000164638	SLC29A4	protein_coding	3.56094	4.90569	1.40498	3.49165	0.000480039	0.0370959	Up Regulated in ART
ENSG00000011426	ANLN	protein_coding	37.4456	2.1038	0.572406	3.67536	0.000237516	0.0282344	Up Regulated in ART
ENSG00000136280	CCM2	protein_coding	1816.01	0.788345	0.227622	3.4634	0.000533402	0.0386302	Up Regulated in ART
ENSG00000126522	ASL	protein_coding	224.306	1.12078	0.274497	4.08302	4.44542e-05	0.0152469	Up Regulated in ART
ENSG00000127948	POR	protein_coding	848.117	0.668648	0.20007	3.34207	0.000831557	0.0440191	Up Regulated in ART
ENSG00000189077	TMEM120A	protein_coding	483.654	0.680444	0.196796	3.45762	0.000544979	0.0386681	Up Regulated in ART
ENSG00000091073	DTX2	protein_coding	200.926	1.04532	0.29066	3.59635	0.000322708	0.0309342	Up Regulated in ART
ENSG00000106397	PLOD3	protein_coding	764.08	0.674102	0.195913	3.44082	0.000579965	0.0393694	Up Regulated in ART
ENSG00000128573	FOXP2	protein_coding	1.38199	14.5648	2.19544	6.63411	3.26469e-11	2.82559e-07	Up Regulated in ART
ENSG00000164898	FMC1	protein_coding	11.155	1.63574	0.495468	3.3014	0.000962053	0.0462632	Up Regulated in ART
ENSG00000133597	ADCK2	protein_coding	414.221	0.572844	0.161166	3.55437	0.000378882	0.0321492	Up Regulated in ART
ENSG00000157764	BRAF	protein_coding	983.056	-0.665851	0.173735	-3.83257	0.000126812	0.0236035	Down Regulated in ART
ENSG00000177189	RPS6KA3	protein_coding	4184.55	-0.603129	0.173264	-3.48098	0.00049959	0.0380965	Down Regulated in ART
ENSG00000004848	ARX	protein_coding	0.459363	14.9023	4.30883	3.45856	0.000543069	0.0386681	Up Regulated in ART
ENSG00000180182	MED14	protein_coding	722.08	-0.478529	0.146269	-3.27157	0.00106954	0.048419	Down Regulated in ART
ENSG00000101940	WDR13	protein_coding	750.3	0.986751	0.271049	3.64049	0.000272118	0.0290763	Up Regulated in ART
ENSG00000068394	GPKOW	protein_coding	401.013	0.574882	0.171944	3.34342	0.000827527	0.0440191	Up Regulated in ART
ENSG00000101997	CCDC22	protein_coding	559.831	0.779333	0.23632	3.29778	0.000974517	0.0462782	Up Regulated in ART
ENSG00000169188	APEX2	protein_coding	414.672	0.598046	0.160295	3.73092	0.000190784	0.0261196	Up Regulated in ART
ENSG00000134590	RTL8C	protein_coding	307.485	0.805614	0.23602	3.41334	0.00064173	0.0407179	Up Regulated in ART
ENSG00000203950	RTL8A	protein_coding	155.102	0.685782	0.19673	3.48591	0.000490458	0.0375656	Up Regulated in ART
ENSG00000102030	NAA10	protein_coding	356.758	1.08963	0.293715	3.70982	0.000207408	0.0267928	Up Regulated in ART
ENSG00000102032	RENBP	protein_coding	415.459	0.974633	0.272647	3.57471	0.000350621	0.0317762	Up Regulated in ART
ENSG00000147364	FBXO25	protein_coding	715.11	-0.391279	0.106945	-3.6587	0.000253496	0.0282479	Down Regulated in ART
ENSG00000147443	DOK2	protein_coding	2331.97	0.904282	0.240031	3.76736	0.000164985	0.0249973	Up Regulated in ART
ENSG00000168476	REEP4	protein_coding	571.063	0.872033	0.259679	3.35812	0.000784755	0.0432615	Up Regulated in ART
ENSG00000120913	PDLIM2	protein_coding	631.921	0.858611	0.254735	3.3706	0.00075005	0.0428494	Up Regulated in ART
ENSG00000187840	EIF4EBP1	protein_coding	385.388	1.11855	0.316058	3.53907	0.000401536	0.033098	Up Regulated in ART
ENSG00000187735	TCEA1	protein_coding	2494.45	-0.537721	0.150086	-3.58275	0.000340001	0.031642	Down Regulated in ART
ENSG00000205189	ZBTB10	protein_coding	680.649	-0.978378	0.2881	-3.39597	0.000683869	0.0418296	Down Regulated in ART
ENSG00000130193	THEM6	protein_coding	160.283	1.46033	0.399258	3.65761	0.000254574	0.0282479	Up Regulated in ART
ENSG00000160932	LY6E	protein_coding	4664.36	1.32721	0.368366	3.60297	0.000314597	0.0309342	Up Regulated in ART
ENSG00000104524	PYCR3	protein_coding	44.3067	1.74972	0.474525	3.68732	0.000226627	0.0282224	Up Regulated in ART
ENSG00000179950	PUF60	protein_coding	1758.43	0.729237	0.215543	3.38325	0.000716333	0.0425222	Up Regulated in ART
ENSG00000179091	CYC1	protein_coding	1357.5	0.751679	0.217123	3.46199	0.000536189	0.0386302	Up Regulated in ART
ENSG00000179632	MAF1	protein_coding	2443.26	0.527179	0.141605	3.72288	0.000196964	0.0262265	Up Regulated in ART
ENSG00000185803	SLC52A2	protein_coding	354.619	1.36773	0.361225	3.78637	0.000152866	0.0249973	Up Regulated in ART
ENSG00000167700	MFSD3	protein_coding	75.0504	1.47209	0.425316	3.46117	0.000537832	0.0386302	Up Regulated in ART
ENSG00000164967	RPP25L	protein_coding	170.328	1.1944	0.30236	3.95027	7.80639e-05	0.0195839	Up Regulated in ART
ENSG00000155827	RNF20	protein_coding	949.703	-0.417037	0.125267	-3.32918	0.00087101	0.0446071	Down Regulated in ART
ENSG00000136856	SLC2A8	protein_coding	90.2847	1.14537	0.288462	3.97061	7.16895e-05	0.0188022	Up Regulated in ART
ENSG00000160404	TOR2A	protein_coding	498.543	0.863388	0.251154	3.43768	0.000586715	0.0393895	Up Regulated in ART
ENSG00000095370	SH2D3C	protein_coding	1108.92	1.13646	0.31036	3.66175	0.000250497	0.0282479	Up Regulated in ART
ENSG00000148339	SLC25A25	protein_coding	595.058	0.920405	0.222682	4.13328	3.57626e-05	0.0148255	Up Regulated in ART
ENSG00000119333	WDR34	protein_coding	99.6874	1.46415	0.433164	3.38012	0.000724544	0.0425222	Up Regulated in ART
ENSG00000160446	ZDHHC12	protein_coding	314.422	1.57759	0.349418	4.5149	6.33471e-06	0.00679082	Up Regulated in ART
ENSG00000160326	SLC2A6	protein_coding	663.666	1.23097	0.341781	3.60164	0.000316222	0.0309342	Up Regulated in ART
ENSG00000169692	AGPAT2	protein_coding	371.713	1.22339	0.361616	3.38313	0.000716646	0.0425222	Up Regulated in ART
ENSG00000159069	FBXW5	protein_coding	1514.69	1.14765	0.343618	3.33991	0.000838057	0.0440935	Up Regulated in ART
ENSG00000107281	NPDC1	protein_coding	235.47	1.82218	0.46172	3.9465	7.93017e-05	0.0196102	Up Regulated in ART
ENSG00000176101	SSNA1	protein_coding	687.373	1.23649	0.335913	3.681	0.000232323	0.0282344	Up Regulated in ART
ENSG00000188986	NELFB	protein_coding	900.052	0.791079	0.233172	3.39269	0.000692097	0.0421838	Up Regulated in ART
ENSG00000198113	TOR4A	protein_coding	225.566	1.1571	0.307966	3.75722	0.000171812	0.0249973	Up Regulated in ART
ENSG00000182154	MRPL41	protein_coding	157.756	1.39797	0.417457	3.34877	0.000811701	0.0439079	Up Regulated in ART
ENSG00000197070	ARRDC1	protein_coding	664.572	1.01887	0.295747	3.44508	0.000570897	0.0390803	Up Regulated in ART
ENSG00000185201	IFITM2	protein_coding	5392.91	0.999351	0.288669	3.46192	0.000536337	0.0386302	Up Regulated in ART
ENSG00000142089	IFITM3	protein_coding	4170.42	1.69737	0.517548	3.27964	0.00103941	0.0478516	Up Regulated in ART
ENSG00000023191	RNH1	protein_coding	2400.32	1.11619	0.334472	3.33716	0.000846392	0.044263	Up Regulated in ART
ENSG00000174775	HRAS	protein_coding	207.854	1.16039	0.283692	4.0903	4.3081e-05	0.015219	Up Regulated in ART
ENSG00000185507	IRF7	protein_coding	1012.11	1.89401	0.449269	4.21577	2.48933e-05	0.0130577	Up Regulated in ART
ENSG00000078902	TOLLIP	protein_coding	617.539	0.837467	0.234711	3.56808	0.000359605	0.0319219	Up Regulated in ART
ENSG00000214026	MRPL23	protein_coding	144.757	1.17676	0.313972	3.74799	0.000178255	0.0250861	Up Regulated in ART
ENSG00000110651	CD81	protein_coding	2566.63	0.846603	0.230908	3.66641	0.000245976	0.0282479	Up Regulated in ART
ENSG00000184281	TSSC4	protein_coding	520.465	1.03985	0.311986	3.33299	0.000859191	0.0445717	Up Regulated in ART
ENSG00000170242	USP47	protein_coding	1777.41	-0.464448	0.134821	-3.44494	0.000571191	0.0390803	Down Regulated in ART
ENSG00000148943	LIN7C	protein_coding	484.205	-0.651508	0.189942	-3.43003	0.000603507	0.0401192	Down Regulated in ART
ENSG00000181830	SLC35C1	protein_coding	360.243	0.725674	0.212468	3.41546	0.000636745	0.0407179	Up Regulated in ART
ENSG00000121680	PEX16	protein_coding	550.857	1.09046	0.293652	3.71344	0.00020446	0.0266105	Up Regulated in ART
ENSG00000167985	SDHAF2	protein_coding	202.286	0.631038	0.189951	3.32211	0.000893401	0.0452186	Up Regulated in ART
ENSG00000204922	UQCC3	protein_coding	80.4159	1.74931	0.439362	3.98148	6.84882e-05	0.018319	Up Regulated in ART
ENSG00000176340	COX8A	protein_coding	946.715	0.732577	0.222537	3.29193	0.000995026	0.0466772	Up Regulated in ART
ENSG00000149781	FERMT3	protein_coding	4099.79	0.951846	0.291688	3.26324	0.00110147	0.0492674	Up Regulated in ART
ENSG00000149761	NUDT22	protein_coding	554.942	0.870643	0.263528	3.3038	0.00095384	0.0462492	Up Regulated in ART
ENSG00000002330	BAD	protein_coding	213.214	1.24473	0.296876	4.19278	2.7556e-05	0.0136284	Up Regulated in ART
ENSG00000173153	ESRRA	protein_coding	439.165	0.871196	0.25764	3.38144	0.000721061	0.0425222	Up Regulated in ART
ENSG00000173113	TRMT112	protein_coding	1357.84	0.784648	0.203138	3.86264	0.000112168	0.0220224	Up Regulated in ART
ENSG00000126432	PRDX5	protein_coding	1705.92	0.764266	0.231234	3.30516	0.000949223	0.0461547	Up Regulated in ART
ENSG00000110047	EHD1	protein_coding	2482.4	0.812714	0.213954	3.79854	0.000145551	0.0249973	Up Regulated in ART
ENSG00000168061	SAC3D1	protein_coding	38.8225	2.15013	0.485588	4.42788	9.51642e-06	0.00866996	Up Regulated in ART
ENSG00000126391	FRMD8	protein_coding	941.953	0.603269	0.178478	3.38007	0.000724671	0.0425222	Up Regulated in ART
ENSG00000176973	FAM89B	protein_coding	144.713	1.70354	0.301768	5.6452	1.64991e-08	7.13997e-05	Up Regulated in ART
ENSG00000175550	DRAP1	protein_coding	1355.06	1.03838	0.284438	3.65064	0.000261588	0.0285652	Up Regulated in ART
ENSG00000175334	BANF1	protein_coding	1294.43	0.709086	0.189004	3.75171	0.000175635	0.0249973	Up Regulated in ART
ENSG00000174744	BRMS1	protein_coding	1032.95	0.702614	0.213577	3.28974	0.00100279	0.0467879	Up Regulated in ART
ENSG00000172531	PPP1CA	protein_coding	4205.23	0.495604	0.145079	3.4161	0.000635257	0.0407179	Up Regulated in ART
ENSG00000172725	CORO1B	protein_coding	848.628	1.26166	0.348502	3.62025	0.000294323	0.0303258	Up Regulated in ART
ENSG00000167797	CDK2AP2	protein_coding	605.224	1.26474	0.2761	4.58073	4.63357e-06	0.00670328	Up Regulated in ART
ENSG00000084207	GSTP1	protein_coding	3509.9	0.861097	0.249402	3.45264	0.000555121	0.0389909	Up Regulated in ART
ENSG00000110057	UNC93B1	protein_coding	1384.01	1.06047	0.289791	3.65942	0.000252782	0.0282479	Up Regulated in ART
ENSG00000110719	TCIRG1	protein_coding	4390.28	1.22126	0.351594	3.4735	0.000513712	0.0384026	Up Regulated in ART
ENSG00000171067	C11orf24	protein_coding	265.807	0.844893	0.207101	4.07961	4.51104e-05	0.0152469	Up Regulated in ART
ENSG00000077458	FAM76B	protein_coding	1064	-0.698233	0.185495	-3.76416	0.000167111	0.0249973	Down Regulated in ART
ENSG00000086848	ALG9	protein_coding	75.5791	-0.78789	0.180926	-4.35477	1.33207e-05	0.00985767	Down Regulated in ART
ENSG00000160703	NLRX1	protein_coding	291.14	0.8121	0.241511	3.36259	0.000772162	0.043106	Up Regulated in ART
ENSG00000067057	PFKP	protein_coding	840.013	0.871362	0.249216	3.49641	0.000471558	0.0367688	Up Regulated in ART
ENSG00000172671	ZFAND4	protein_coding	358.548	-0.607011	0.164513	-3.68974	0.000224481	0.0281686	Down Regulated in ART
ENSG00000214655	ZSWIM8	protein_coding	1781.83	0.46715	0.141196	3.30853	0.000937887	0.0460329	Up Regulated in ART
ENSG00000165644	COMTD1	protein_coding	45.3654	1.82048	0.523719	3.47606	0.000508834	0.0382953	Up Regulated in ART
ENSG00000138172	CALHM2	protein_coding	747.329	0.919889	0.25221	3.64732	0.000264988	0.0285652	Up Regulated in ART
ENSG00000150593	PDCD4	protein_coding	3297.79	-0.664914	0.180211	-3.68964	0.000224567	0.0281686	Down Regulated in ART
ENSG00000165752	STK32C	protein_coding	208.544	0.950382	0.271956	3.49462	0.000474736	0.0368506	Up Regulated in ART
ENSG00000151651	ADAM8	protein_coding	2590.66	1.05513	0.263888	3.99842	6.37675e-05	0.0179661	Up Regulated in ART
ENSG00000148832	PAOX	protein_coding	105.008	1.03521	0.303932	3.40606	0.000659074	0.0413354	Up Regulated in ART
ENSG00000111679	PTPN6	protein_coding	7386.77	0.752161	0.183801	4.09226	4.27191e-05	0.015219	Up Regulated in ART
ENSG00000187778	MCRS1	protein_coding	1350.8	0.604053	0.16844	3.58615	0.000335591	0.0314004	Up Regulated in ART
ENSG00000123358	NR4A1	protein_coding	1434.63	2.27797	0.603184	3.77657	0.000159001	0.0249973	Up Regulated in ART
ENSG00000123395	ATG101	protein_coding	482.424	0.854191	0.244192	3.49803	0.000468717	0.0367126	Up Regulated in ART
ENSG00000135486	HNRNPA1	protein_coding	33363.2	-0.512813	0.1362	-3.76515	0.000166449	0.0249973	Down Regulated in ART
ENSG00000179912	R3HDM2	protein_coding	1077.19	-0.398587	0.119425	-3.33755	0.000845199	0.044263	Down Regulated in ART
ENSG00000184575	XPOT	protein_coding	2151.12	-0.409388	0.114651	-3.57075	0.000355964	0.0319219	Down Regulated in ART
ENSG00000186908	ZDHHC17	protein_coding	1035.98	-0.533004	0.158591	-3.36088	0.000776954	0.043106	Down Regulated in ART
ENSG00000136021	SCYL2	protein_coding	1409.5	-0.645318	0.180745	-3.57032	0.000356552	0.0319219	Down Regulated in ART
ENSG00000110876	SELPLG	protein_coding	7268.97	0.786581	0.208066	3.78043	0.000156555	0.0249973	Up Regulated in ART
ENSG00000198324	PHETA1	protein_coding	191.526	1.11637	0.295158	3.78226	0.000155411	0.0249973	Up Regulated in ART
ENSG00000276045	ORAI1	protein_coding	933.258	0.658964	0.198979	3.31173	0.000927208	0.0459363	Up Regulated in ART
ENSG00000121741	ZMYM2	protein_coding	2061.43	-0.575742	0.171786	-3.35152	0.000803702	0.0438867	Down Regulated in ART
ENSG00000120686	UFM1	protein_coding	2032.43	-0.475703	0.142737	-3.33272	0.000860019	0.0445717	Down Regulated in ART
ENSG00000065150	IPO5	protein_coding	2212.12	-0.402371	0.117645	-3.42021	0.000625733	0.0407179	Down Regulated in ART
ENSG00000126777	KTN1	protein_coding	3873.72	-0.429087	0.101717	-4.21845	2.45986e-05	0.0130577	Down Regulated in ART
ENSG00000131951	LRRC9	protein_coding	0.259956	16.4517	4.11677	3.99626	6.43499e-05	0.0179661	Up Regulated in ART
ENSG00000100731	PCNX1	protein_coding	2972.46	-0.613212	0.181788	-3.37323	0.000742909	0.0426232	Down Regulated in ART
ENSG00000119707	RBM25	protein_coding	3655.98	-0.540844	0.155034	-3.48855	0.000485648	0.0373625	Down Regulated in ART
ENSG00000156127	BATF	protein_coding	263.479	1.31593	0.358236	3.67337	0.000239371	0.0282344	Up Regulated in ART
ENSG00000100796	PPP4R3A	protein_coding	3671.56	-0.460269	0.127408	-3.61257	0.000303176	0.0304272	Down Regulated in ART
ENSG00000100811	YY1	protein_coding	3891.75	-0.34399	0.102909	-3.34268	0.000829735	0.0440191	Down Regulated in ART
ENSG00000179627	AL590327.1	protein_coding	52.4846	1.23483	0.296178	4.16921	3.05654e-05	0.0139234	Up Regulated in ART
ENSG00000185347	TEDC1	protein_coding	105.753	1.34563	0.404184	3.32926	0.000870768	0.0446071	Up Regulated in ART
ENSG00000140264	SERF2	protein_coding	8853.99	0.858315	0.247222	3.47183	0.000516916	0.0384026	Up Regulated in ART
ENSG00000103653	CSK	protein_coding	4731.21	0.971435	0.238946	4.06551	4.79279e-05	0.0153635	Up Regulated in ART
ENSG00000140497	SCAMP2	protein_coding	2249.68	0.446506	0.129892	3.43751	0.000587087	0.0393895	Up Regulated in ART
ENSG00000178718	RPP25	protein_coding	56.8675	1.44449	0.378266	3.81871	0.000134149	0.0241888	Up Regulated in ART
ENSG00000138621	PPCDC	protein_coding	302.497	0.807111	0.208032	3.87975	0.000104565	0.0215328	Up Regulated in ART
ENSG00000172379	ARNT2	protein_coding	0.522969	16.4544	4.31802	3.81063	0.00013861	0.0244831	Up Regulated in ART
ENSG00000181991	MRPS11	protein_coding	389.264	0.668294	0.188167	3.5516	0.000382901	0.0323318	Up Regulated in ART
ENSG00000161980	POLR3K	protein_coding	192.495	0.810392	0.22219	3.64729	0.000265021	0.0285652	Up Regulated in ART
ENSG00000161981	SNRNP25	protein_coding	303.997	0.854813	0.218837	3.90616	9.37727e-05	0.0210806	Up Regulated in ART
ENSG00000103152	MPG	protein_coding	363.914	1.34771	0.384305	3.50688	0.000453386	0.0362801	Up Regulated in ART
ENSG00000167930	FAM234A	protein_coding	225.923	1.02723	0.305487	3.36258	0.000772164	0.043106	Up Regulated in ART
ENSG00000086504	MRPL28	protein_coding	616.308	0.991508	0.26398	3.75599	0.000172656	0.0249973	Up Regulated in ART
ENSG00000174109	C16orf91	protein_coding	160.087	1.11174	0.325681	3.41359	0.000641123	0.0407179	Up Regulated in ART
ENSG00000103024	NME3	protein_coding	255.257	1.91671	0.475899	4.02756	5.63578e-05	0.0174206	Up Regulated in ART
ENSG00000074071	MRPS34	protein_coding	426.964	0.901587	0.264087	3.41398	0.000640222	0.0407179	Up Regulated in ART
ENSG00000063854	HAGH	protein_coding	624.502	0.830048	0.208532	3.98044	6.87889e-05	0.018319	Up Regulated in ART
ENSG00000065057	NTHL1	protein_coding	99.4978	1.37631	0.364232	3.77867	0.000157667	0.0249973	Up Regulated in ART
ENSG00000184207	PGP	protein_coding	410.148	0.944278	0.243501	3.87792	0.000105353	0.0215328	Up Regulated in ART
ENSG00000103363	ELOB	protein_coding	1632.29	1.32307	0.337649	3.91848	8.91091e-05	0.0208387	Up Regulated in ART
ENSG00000127564	PKMYT1	protein_coding	27.2156	4.0626	0.960407	4.23008	2.33606e-05	0.0130577	Up Regulated in ART
ENSG00000162073	PAQR4	protein_coding	202.133	1.19942	0.27501	4.36139	1.29238e-05	0.00985767	Up Regulated in ART
ENSG00000262246	CORO7	protein_coding	644.15	0.885387	0.258766	3.42158	0.000622584	0.0406677	Up Regulated in ART
ENSG00000103174	NAGPA	protein_coding	512.269	0.674099	0.184217	3.65928	0.00025293	0.0282479	Up Regulated in ART
ENSG00000166851	PLK1	protein_coding	62.9349	1.95339	0.45836	4.26169	2.02888e-05	0.0125428	Up Regulated in ART
ENSG00000013364	MVP	protein_coding	3852.82	0.80627	0.243227	3.31489	0.000916802	0.0457344	Up Regulated in ART
ENSG00000102879	CORO1A	protein_coding	17480.2	1.06104	0.292912	3.62239	0.000291892	0.0303258	Up Regulated in ART
ENSG00000169627	BOLA2B	protein_coding	12.4378	1.91803	0.571972	3.35337	0.000798344	0.043732	Up Regulated in ART
ENSG00000169221	TBC1D10B	protein_coding	902.49	0.555804	0.156349	3.5549	0.000378129	0.0321492	Up Regulated in ART
ENSG00000179958	DCTPP1	protein_coding	279.19	0.692106	0.179413	3.85761	0.000114501	0.0220224	Up Regulated in ART
ENSG00000103490	PYCARD	protein_coding	745.3	1.30153	0.354357	3.67294	0.000239772	0.0282344	Up Regulated in ART
ENSG00000140678	ITGAX	protein_coding	5689.71	0.772878	0.233676	3.30748	0.000941401	0.0460329	Up Regulated in ART
ENSG00000102910	LONP2	protein_coding	1744.39	-0.524179	0.150758	-3.47697	0.000507119	0.0382953	Down Regulated in ART
ENSG00000125148	MT2A	protein_coding	719.398	1.74057	0.45522	3.82359	0.000131525	0.0239653	Up Regulated in ART
ENSG00000169715	MT1E	protein_coding	90.7571	2.64993	0.570514	4.64481	3.40393e-06	0.00670328	Up Regulated in ART
ENSG00000187193	MT1X	protein_coding	54.5721	1.58065	0.272802	5.79414	6.8671e-09	3.96232e-05	Up Regulated in ART
ENSG00000102890	ELMO3	protein_coding	94.053	1.29051	0.394096	3.2746	0.0010581	0.0481994	Up Regulated in ART
ENSG00000168701	TMEM208	protein_coding	441.829	0.698318	0.211539	3.30114	0.000962931	0.0462632	Up Regulated in ART
ENSG00000135723	FHOD1	protein_coding	909.431	0.891449	0.216029	4.12653	3.68282e-05	0.0148255	Up Regulated in ART
ENSG00000102977	ACD	protein_coding	286.894	1.01104	0.257094	3.93257	8.40432e-05	0.02049	Up Regulated in ART
ENSG00000102981	PARD6A	protein_coding	60.481	1.47757	0.377382	3.91531	9.0289e-05	0.0208387	Up Regulated in ART
ENSG00000159792	PSKH1	protein_coding	525.855	0.666825	0.179515	3.7146	0.000203524	0.0266105	Up Regulated in ART
ENSG00000167513	CDT1	protein_coding	34.0951	2.66388	0.690409	3.85841	0.000114127	0.0220224	Up Regulated in ART
ENSG00000131165	CHMP1A	protein_coding	1318.73	0.700125	0.203607	3.43861	0.000584709	0.0393895	Up Regulated in ART
ENSG00000158792	SPATA2L	protein_coding	122.193	1.58741	0.407027	3.90001	9.6188e-05	0.0211741	Up Regulated in ART
ENSG00000040633	PHF23	protein_coding	441.693	0.751571	0.202975	3.70277	0.000213256	0.0273441	Up Regulated in ART
ENSG00000181284	TMEM102	protein_coding	85.0279	0.842898	0.249731	3.37522	0.000737564	0.0426232	Up Regulated in ART
ENSG00000239697	TNFSF12	protein_coding	486.697	0.744522	0.225834	3.29676	0.000978058	0.0462782	Up Regulated in ART
ENSG00000183011	NAA38	protein_coding	428.853	1.16482	0.353124	3.2986	0.000971683	0.0462782	Up Regulated in ART
ENSG00000196544	BORCS6	protein_coding	182.252	1.01134	0.282712	3.57727	0.000347207	0.0317762	Up Regulated in ART
ENSG00000108262	GIT1	protein_coding	1486.93	0.657498	0.174899	3.7593	0.000170387	0.0249973	Up Regulated in ART
ENSG00000167925	GHDC	protein_coding	545.289	0.825322	0.247084	3.34025	0.000837037	0.0440935	Up Regulated in ART
ENSG00000131462	TUBG1	protein_coding	155.627	0.898102	0.249967	3.59289	0.000327034	0.0309342	Up Regulated in ART
ENSG00000108840	HDAC5	protein_coding	1265.29	0.680301	0.16945	4.01477	5.95045e-05	0.017759	Up Regulated in ART
ENSG00000186185	KIF18B	protein_coding	22.1181	3.39659	0.911668	3.72569	0.000194781	0.0261369	Up Regulated in ART
ENSG00000108798	ABI3	protein_coding	918.593	1.04348	0.248175	4.20461	2.61534e-05	0.0133151	Up Regulated in ART
ENSG00000108406	DHX40	protein_coding	870.582	-0.54037	0.16496	-3.27577	0.00105376	0.0481282	Down Regulated in ART
ENSG00000136490	LIMD2	protein_coding	6625.04	0.921083	0.260101	3.54126	0.000398225	0.0330964	Up Regulated in ART
ENSG00000007312	CD79B	protein_coding	757.76	1.38587	0.421586	3.28727	0.00101162	0.047073	Up Regulated in ART
ENSG00000108622	ICAM2	protein_coding	1627.42	0.73982	0.220247	3.35904	0.000782137	0.0432549	Up Regulated in ART
ENSG00000125458	NT5C	protein_coding	337.503	0.881712	0.263253	3.3493	0.000810163	0.0439079	Up Regulated in ART
ENSG00000189159	JPT1	protein_coding	1036.95	0.670368	0.188545	3.55549	0.000377282	0.0321492	Up Regulated in ART
ENSG00000176170	SPHK1	protein_coding	195.352	1.4104	0.411293	3.42918	0.000605412	0.0401192	Up Regulated in ART
ENSG00000108639	SYNGR2	protein_coding	2441.36	0.895628	0.244237	3.66704	0.000245377	0.0282479	Up Regulated in ART
ENSG00000167900	TK1	protein_coding	85.1331	1.66287	0.489633	3.39615	0.000683403	0.0418296	Up Regulated in ART
ENSG00000141570	CBX8	protein_coding	45.9426	1.62544	0.427393	3.80314	0.000142873	0.0249811	Up Regulated in ART
ENSG00000181409	AATK	protein_coding	62.5661	1.74675	0.515541	3.3882	0.000703534	0.0422853	Up Regulated in ART
ENSG00000157637	SLC38A10	protein_coding	1734.19	1.03773	0.300734	3.45068	0.000559186	0.0390303	Up Regulated in ART
ENSG00000225663	MCRIP1	protein_coding	672.005	1.26724	0.347507	3.64665	0.000265684	0.0285652	Up Regulated in ART
ENSG00000141552	ANAPC11	protein_coding	408.869	1.13204	0.306373	3.69497	0.000219912	0.0279902	Up Regulated in ART
ENSG00000187531	SIRT7	protein_coding	1080.87	0.741593	0.217106	3.41581	0.000635919	0.0407179	Up Regulated in ART
ENSG00000169696	ASPSCR1	protein_coding	311.404	1.07117	0.31449	3.40606	0.000659072	0.0413354	Up Regulated in ART
ENSG00000169738	DCXR	protein_coding	479.065	1.42963	0.316392	4.51855	6.2264e-06	0.00679082	Up Regulated in ART
ENSG00000141526	SLC16A3	protein_coding	690.194	1.28983	0.333059	3.87269	0.000107639	0.0216655	Up Regulated in ART
ENSG00000178927	CYBC1	protein_coding	2331.12	0.937444	0.224112	4.18293	2.87775e-05	0.0138372	Up Regulated in ART
ENSG00000078043	PIAS2	protein_coding	370.145	-0.399157	0.120268	-3.31891	0.000903695	0.0453419	Down Regulated in ART
ENSG00000265681	RPL17	protein_coding	413.414	-0.712454	0.210082	-3.39131	0.000695582	0.0422474	Down Regulated in ART
ENSG00000088827	SIGLEC1	protein_coding	2277.72	3.3542	0.889442	3.77113	0.000162513	0.0249973	Up Regulated in ART
ENSG00000101460	MAP1LC3A	protein_coding	32.0219	1.70626	0.445921	3.82638	0.000130043	0.0239472	Up Regulated in ART
ENSG00000125995	ROMO1	protein_coding	301.967	1.33166	0.350856	3.79546	0.000147368	0.0249973	Up Regulated in ART
ENSG00000124193	SRSF6	protein_coding	6297.81	-0.382737	0.116978	-3.27186	0.00106843	0.048419	Down Regulated in ART
ENSG00000101057	MYBL2	protein_coding	221.602	1.73746	0.463209	3.75093	0.00017618	0.0249973	Up Regulated in ART
ENSG00000101181	MTG2	protein_coding	304.233	0.879993	0.266793	3.29841	0.000972352	0.0462782	Up Regulated in ART
ENSG00000171700	RGS19	protein_coding	1407.8	1.06918	0.282667	3.78246	0.000155289	0.0249973	Up Regulated in ART
ENSG00000141933	TPGS1	protein_coding	23.0338	1.9151	0.586845	3.26338	0.00110093	0.0492674	Up Regulated in ART
ENSG00000172270	BSG	protein_coding	2700.96	0.927602	0.257374	3.6041	0.000313231	0.0309342	Up Regulated in ART
ENSG00000099624	ATP5F1D	protein_coding	358.516	1.54905	0.4171	3.71385	0.000204127	0.0266105	Up Regulated in ART
ENSG00000228300	C19orf24	protein_coding	263.425	1.74821	0.39841	4.38796	1.14418e-05	0.00951111	Up Regulated in ART
ENSG00000127540	UQCR11	protein_coding	368.336	0.841426	0.206512	4.07446	4.6122e-05	0.0152469	Up Regulated in ART
ENSG00000125910	S1PR4	protein_coding	596.261	1.46976	0.400145	3.67307	0.000239651	0.0282344	Up Regulated in ART
ENSG00000183617	MRPL54	protein_coding	730.117	0.958521	0.285018	3.36302	0.000770941	0.043106	Up Regulated in ART
ENSG00000008382	MPND	protein_coding	269.184	0.860217	0.263094	3.26962	0.00107691	0.048419	Up Regulated in ART
ENSG00000167680	SEMA6B	protein_coding	23.1733	-4.43492	1.18174	-3.75288	0.000174811	0.0249973	Down Regulated in ART
ENSG00000032444	PNPLA6	protein_coding	1431.21	0.868823	0.264717	3.28208	0.00103044	0.0476683	Up Regulated in ART
ENSG00000104976	SNAPC2	protein_coding	246.926	1.10769	0.308266	3.59331	0.000326507	0.0309342	Up Regulated in ART
ENSG00000105371	ICAM4	protein_coding	84.9805	2.00687	0.499823	4.01517	5.94038e-05	0.017759	Up Regulated in ART
ENSG00000079999	KEAP1	protein_coding	495.23	0.715692	0.206693	3.46258	0.00053502	0.0386302	Up Regulated in ART
ENSG00000099203	TMED1	protein_coding	236.05	0.949354	0.26279	3.6126	0.000303145	0.0304272	Up Regulated in ART
ENSG00000161914	ZNF653	protein_coding	51.1748	1.31213	0.370501	3.54149	0.000397869	0.0330964	Up Regulated in ART
ENSG00000198356	ASNA1	protein_coding	1036.36	0.730849	0.202054	3.61709	0.000297933	0.0303399	Up Regulated in ART
ENSG00000179115	FARSA	protein_coding	401.041	0.977901	0.288608	3.38834	0.000703169	0.0422853	Up Regulated in ART
ENSG00000179271	GADD45GIP1	protein_coding	267.265	1.12762	0.339626	3.32019	0.000899564	0.0453419	Up Regulated in ART
ENSG00000104903	LYL1	protein_coding	232.872	1.37107	0.417823	3.28147	0.00103268	0.0476683	Up Regulated in ART
ENSG00000132017	DCAF15	protein_coding	706.53	0.861654	0.248652	3.46531	0.000529629	0.0386302	Up Regulated in ART
ENSG00000132005	RFX1	protein_coding	186.162	0.863114	0.260517	3.31308	0.000922755	0.0458991	Up Regulated in ART
ENSG00000105011	ASF1B	protein_coding	139.654	1.25692	0.279069	4.50398	6.6692e-06	0.00679082	Up Regulated in ART
ENSG00000123143	PKN1	protein_coding	4161.29	0.744424	0.2188	3.4023	0.000668209	0.041757	Up Regulated in ART
ENSG00000099797	TECR	protein_coding	1007.74	0.737227	0.200059	3.68505	0.000228659	0.0282344	Up Regulated in ART
ENSG00000099795	NDUFB7	protein_coding	570.169	1.76426	0.440933	4.00121	6.30202e-05	0.0179661	Up Regulated in ART
ENSG00000130303	BST2	protein_coding	2191.46	0.869483	0.253615	3.42836	0.000607234	0.0401192	Up Regulated in ART
ENSG00000130511	SSBP4	protein_coding	764.205	1.24143	0.354716	3.49978	0.000465646	0.0366379	Up Regulated in ART
ENSG00000105669	COPE	protein_coding	1275.24	1.16612	0.329785	3.53599	0.00040625	0.0333279	Up Regulated in ART
ENSG00000105671	DDX49	protein_coding	573.989	0.875213	0.24588	3.55952	0.000371535	0.0321492	Up Regulated in ART
ENSG00000064490	RFXANK	protein_coding	686.045	0.778941	0.231538	3.3642	0.00076767	0.043106	Up Regulated in ART
ENSG00000126254	RBM42	protein_coding	542.639	0.981517	0.248081	3.95644	7.60739e-05	0.0193653	Up Regulated in ART
ENSG00000205138	SDHAF1	protein_coding	121.835	1.07756	0.254812	4.22883	2.34908e-05	0.0130577	Up Regulated in ART
ENSG00000104823	ECH1	protein_coding	693.848	1.16924	0.32262	3.6242	0.000289853	0.0303258	Up Regulated in ART
ENSG00000128626	MRPS12	protein_coding	219.933	1.15694	0.334153	3.46231	0.000535553	0.0386302	Up Regulated in ART
ENSG00000105204	DYRK1B	protein_coding	226.567	1.02636	0.264056	3.88691	0.000101527	0.0214349	Up Regulated in ART
ENSG00000077348	EXOSC5	protein_coding	193.476	1.29277	0.365155	3.54035	0.000399604	0.0330964	Up Regulated in ART
ENSG00000170684	ZNF296	protein_coding	43.453	1.5953	0.443377	3.59806	0.000320594	0.0309342	Up Regulated in ART
ENSG00000142252	GEMIN7	protein_coding	307.473	0.719678	0.213617	3.36902	0.000754367	0.0429542	Up Regulated in ART
ENSG00000117877	CD3EAP	protein_coding	31.2154	1.98925	0.502323	3.96011	7.49162e-05	0.0193552	Up Regulated in ART
ENSG00000104983	CCDC61	protein_coding	127.787	1.23678	0.348548	3.54839	0.000387601	0.0325698	Up Regulated in ART
ENSG00000204866	IGFL2	protein_coding	5.72495	4.78219	1.46257	3.26971	0.00107657	0.048419	Up Regulated in ART
ENSG00000105281	SLC1A5	protein_coding	697.919	0.998937	0.218103	4.58012	4.64699e-06	0.00670328	Up Regulated in ART
ENSG00000105327	BBC3	protein_coding	125.447	1.24447	0.360988	3.4474	0.000566008	0.0390803	Up Regulated in ART
ENSG00000142227	EMP3	protein_coding	5334.53	0.681578	0.197442	3.45204	0.000556369	0.0389909	Up Regulated in ART
ENSG00000087088	BAX	protein_coding	1523.48	0.648645	0.189165	3.429	0.000605819	0.0401192	Up Regulated in ART
ENSG00000183207	RUVBL2	protein_coding	464.602	0.89385	0.264384	3.38088	0.000722544	0.0425222	Up Regulated in ART
ENSG00000126458	RRAS	protein_coding	465.365	1.41238	0.330604	4.27212	1.9362e-05	0.0124132	Up Regulated in ART
ENSG00000213024	NUP62	protein_coding	1047.2	0.615123	0.183837	3.34603	0.00081978	0.0439676	Up Regulated in ART
ENSG00000105379	ETFB	protein_coding	258.234	0.975185	0.29139	3.34667	0.000817883	0.0439676	Up Regulated in ART
ENSG00000170892	TSEN34	protein_coding	420.952	0.767614	0.232902	3.29587	0.000981174	0.0462782	Up Regulated in ART
ENSG00000125503	PPP1R12C	protein_coding	1562.58	0.968529	0.292497	3.31125	0.00092881	0.0459363	Up Regulated in ART
ENSG00000133265	HSPBP1	protein_coding	199.576	1.23778	0.358286	3.45472	0.00055087	0.0389207	Up Regulated in ART
ENSG00000063241	ISOC2	protein_coding	148.509	1.71071	0.36614	4.67228	2.97875e-06	0.00670328	Up Regulated in ART
ENSG00000142409	ZNF787	protein_coding	219.693	1.05348	0.26929	3.91206	9.15128e-05	0.0208432	Up Regulated in ART
ENSG00000100075	SLC25A1	protein_coding	430.253	0.59104	0.162749	3.63161	0.000281653	0.0299106	Up Regulated in ART
ENSG00000093010	COMT	protein_coding	844.489	0.930915	0.276938	3.36145	0.000775348	0.043106	Up Regulated in ART
ENSG00000183773	AIFM3	protein_coding	170.456	1.40871	0.42969	3.27843	0.00104385	0.0479283	Up Regulated in ART
ENSG00000128228	SDF2L1	protein_coding	160.829	1.2182	0.342528	3.55649	0.000375846	0.0321492	Up Regulated in ART
ENSG00000250479	CHCHD10	protein_coding	224.143	1.18296	0.290536	4.07164	4.66831e-05	0.0152469	Up Regulated in ART
ENSG00000128271	ADORA2A	protein_coding	10.783	2.01787	0.60018	3.36211	0.0007735	0.043106	Up Regulated in ART
ENSG00000100319	ZMAT5	protein_coding	295.998	0.907724	0.232816	3.89889	9.66353e-05	0.0211741	Up Regulated in ART
ENSG00000184076	UQCR10	protein_coding	878.141	0.833455	0.208942	3.98892	6.63737e-05	0.018237	Up Regulated in ART
ENSG00000128309	MPST	protein_coding	234.162	1.09521	0.299993	3.6508	0.000261428	0.0285652	Up Regulated in ART
ENSG00000100379	KCTD17	protein_coding	340.491	0.723356	0.216425	3.34229	0.000830909	0.0440191	Up Regulated in ART
ENSG00000128340	RAC2	protein_coding	9111.74	0.721467	0.174146	4.1429	3.42943e-05	0.0148255	Up Regulated in ART
ENSG00000100055	CYTH4	protein_coding	4809.92	0.621682	0.182953	3.39803	0.000678722	0.0418296	Up Regulated in ART
ENSG00000100097	LGALS1	protein_coding	3880.89	1.13837	0.276849	4.11187	3.92467e-05	0.0152156	Up Regulated in ART
ENSG00000273899	NOL12	protein_coding	79.9086	0.989068	0.290953	3.39941	0.000675317	0.0418296	Up Regulated in ART
ENSG00000100412	ACO2	protein_coding	1661.31	0.393532	0.114128	3.44817	0.000564403	0.0390803	Up Regulated in ART
ENSG00000100162	CENPM	protein_coding	33.6123	2.16977	0.582175	3.727	0.00019377	0.0261369	Up Regulated in ART
ENSG00000100300	TSPO	protein_coding	2011.53	1.49424	0.419272	3.56389	0.000365405	0.0321492	Up Regulated in ART
ENSG00000188130	MAPK12	protein_coding	17.2482	2.1919	0.558561	3.92419	8.70213e-05	0.0206348	Up Regulated in ART
ENSG00000196576	PLXNB2	protein_coding	3945.29	1.10407	0.325856	3.38822	0.000703474	0.0422853	Up Regulated in ART
ENSG00000177989	ODF3B	protein_coding	731.149	1.78936	0.471849	3.79223	0.0001493	0.0249973	Up Regulated in ART
ENSG00000241945	PWP2	protein_coding	51.1625	5.78558	1.71458	3.37434	0.000739921	0.0426232	Up Regulated in ART
ENSG00000141959	PFKL	protein_coding	2072.13	1.002	0.288585	3.4721	0.000516397	0.0384026	Up Regulated in ART
ENSG00000160256	FAM207A	protein_coding	88.4932	1.17129	0.3517	3.33036	0.000867334	0.0446071	Up Regulated in ART
ENSG00000228253	MT-ATP8	protein_coding	10276.2	-1.07341	0.322566	-3.32773	0.000875582	0.0447089	Down Regulated in ART

## Sheet: EC_vs_VP
ID	GeneName	BioType	baseMean	log2FoldChange	lfcSE	stat	pvalue	padj	Significance
ENSG00000188976	NOC2L	protein_coding	1068.04	-0.514741	0.163807	-3.14237	0.00167586	0.0104493	Down Regulated in VP
ENSG00000187961	KLHL17	protein_coding	223.338	-1.06487	0.297551	-3.57879	0.00034519	0.0031553	Down Regulated in VP
ENSG00000187583	PLEKHN1	protein_coding	21.4511	-1.33534	0.415334	-3.21508	0.00130406	0.00865714	Down Regulated in VP
ENSG00000131591	C1orf159	protein_coding	171.264	-1.49368	0.312598	-4.77828	1.76799e-06	7.21341e-05	Down Regulated in VP
ENSG00000162571	TTLL10	protein_coding	1.86613	-3.76738	1.21665	-3.09652	0.00195805	0.0117891	Down Regulated in VP
ENSG00000186891	TNFRSF18	protein_coding	41.5552	-1.43695	0.525765	-2.73307	0.00627461	0.0288217	Down Regulated in VP
ENSG00000186827	TNFRSF4	protein_coding	44.9654	-1.60307	0.512728	-3.12654	0.00176875	0.0109146	Down Regulated in VP
ENSG00000078808	SDF4	protein_coding	1650.65	-0.650949	0.14047	-4.63408	3.58526e-06	0.000120481	Down Regulated in VP
ENSG00000160087	UBE2J2	protein_coding	566.063	-0.447879	0.107951	-4.14891	3.34063e-05	0.000578686	Down Regulated in VP
ENSG00000162572	SCNN1D	protein_coding	101.378	-1.82669	0.307103	-5.94815	2.71193e-09	8.10773e-07	Down Regulated in VP
ENSG00000131584	ACAP3	protein_coding	939.297	-1.00114	0.218183	-4.58855	4.46341e-06	0.000141622	Down Regulated in VP
ENSG00000169972	PUSL1	protein_coding	91.7274	-1.10704	0.240254	-4.6078	4.06951e-06	0.000131406	Down Regulated in VP
ENSG00000127054	INTS11	protein_coding	1499.96	-0.65337	0.172011	-3.79843	0.000145615	0.00168194	Down Regulated in VP
ENSG00000224051	CPTP	protein_coding	112.377	-1.03904	0.264639	-3.92624	8.62832e-05	0.00114123	Down Regulated in VP
ENSG00000107404	DVL1	protein_coding	389.98	-1.44127	0.300799	-4.79147	1.65566e-06	6.8847e-05	Down Regulated in VP
ENSG00000175756	AURKAIP1	protein_coding	459.433	-0.779096	0.212162	-3.67218	0.000240493	0.00244727	Down Regulated in VP
ENSG00000221978	CCNL2	protein_coding	3485.14	-0.557853	0.149188	-3.73925	0.000184568	0.00201868	Down Regulated in VP
ENSG00000160072	ATAD3B	protein_coding	611.273	-0.991982	0.228088	-4.34911	1.36689e-05	0.000311867	Down Regulated in VP
ENSG00000197785	ATAD3A	protein_coding	170.139	-1.02159	0.288173	-3.54505	0.000392542	0.00346925	Down Regulated in VP
ENSG00000160075	SSU72	protein_coding	2034.65	-0.361196	0.09095	-3.97137	7.14613e-05	0.000990915	Down Regulated in VP
ENSG00000228594	FNDC10	protein_coding	58.1119	-0.909837	0.347381	-2.61913	0.0088154	0.0375576	Down Regulated in VP
ENSG00000197530	MIB2	protein_coding	247.453	-1.52763	0.375848	-4.0645	4.81353e-05	0.000753308	Down Regulated in VP
ENSG00000248333	CDK11B	protein_coding	915.317	-0.448914	0.121297	-3.70093	0.000214807	0.00226016	Down Regulated in VP
ENSG00000008128	CDK11A	protein_coding	136.081	-0.874633	0.238903	-3.66104	0.000251198	0.00250901	Down Regulated in VP
ENSG00000169885	CALML6	protein_coding	6.80132	-1.69987	0.667986	-2.54477	0.010935	0.0444057	Down Regulated in VP
ENSG00000067606	PRKCZ	protein_coding	220.605	-0.543683	0.195195	-2.78533	0.0053474	0.0255578	Down Regulated in VP
ENSG00000162585	FAAP20	protein_coding	274.528	-0.941242	0.268345	-3.50759	0.000452194	0.00383425	Down Regulated in VP
ENSG00000157933	SKI	protein_coding	1134.25	-0.440178	0.119042	-3.69768	0.000217579	0.00228238	Down Regulated in VP
ENSG00000116151	MORN1	protein_coding	38.9109	-0.758458	0.275703	-2.75099	0.00594147	0.027647	Down Regulated in VP
ENSG00000157911	PEX10	protein_coding	157.848	-0.70417	0.200738	-3.5079	0.000451653	0.00383154	Down Regulated in VP
ENSG00000149527	PLCH2	protein_coding	495.281	-1.31885	0.314442	-4.19424	2.73783e-05	0.000501838	Down Regulated in VP
ENSG00000157881	PANK4	protein_coding	424.359	-0.524642	0.161082	-3.25699	0.00112602	0.00774197	Down Regulated in VP
ENSG00000157873	TNFRSF14	protein_coding	3893.45	-0.864487	0.223309	-3.87126	0.000108276	0.001343	Down Regulated in VP
ENSG00000157870	PRXL2B	protein_coding	277.952	-0.799623	0.202567	-3.94744	7.89911e-05	0.00106379	Down Regulated in VP
ENSG00000142606	MMEL1	protein_coding	11.353	-1.85654	0.568033	-3.26837	0.0010817	0.00749367	Down Regulated in VP
ENSG00000215912	TTC34	protein_coding	52.1193	-1.38271	0.28075	-4.92505	8.4338e-07	4.28862e-05	Down Regulated in VP
ENSG00000162591	MEGF6	protein_coding	533.807	-1.2129	0.315467	-3.84478	0.000120661	0.00145599	Down Regulated in VP
ENSG00000158109	TPRG1L	protein_coding	1109.18	-0.35179	0.0874107	-4.02457	5.70794e-05	0.000853238	Down Regulated in VP
ENSG00000116213	WRAP73	protein_coding	679.532	-0.612518	0.143991	-4.25386	2.10115e-05	0.000415913	Down Regulated in VP
ENSG00000235169	SMIM1	protein_coding	3.76618	-2.94092	1.01535	-2.89646	0.00377394	0.019587	Down Regulated in VP
ENSG00000130764	LRRC47	protein_coding	751.648	-0.193753	0.074657	-2.59524	0.00945237	0.0397343	Down Regulated in VP
ENSG00000131697	NPHP4	protein_coding	253.579	-0.704582	0.206109	-3.4185	0.00062967	0.00494876	Down Regulated in VP
ENSG00000069424	KCNAB2	protein_coding	4956.66	-0.548916	0.157332	-3.4889	0.000485004	0.0040569	Down Regulated in VP
ENSG00000215788	TNFRSF25	protein_coding	1194.46	-0.957549	0.309485	-3.09401	0.00197469	0.0118675	Down Regulated in VP
ENSG00000171680	PLEKHG5	protein_coding	57.6068	-1.60953	0.571273	-2.81745	0.00484064	0.0237445	Down Regulated in VP
ENSG00000204859	ZBTB48	protein_coding	606.845	-0.571867	0.166933	-3.42572	0.000613164	0.00484606	Down Regulated in VP
ENSG00000162413	KLHL21	protein_coding	737.496	-0.517117	0.138571	-3.73179	0.000190122	0.0020669	Down Regulated in VP
ENSG00000041988	THAP3	protein_coding	173.737	-0.537797	0.192918	-2.78769	0.00530849	0.025428	Down Regulated in VP
ENSG00000049249	TNFRSF9	protein_coding	109.294	1.29547	0.336566	3.84908	0.000118564	0.00143468	Up Regulated in VP
ENSG00000131686	CA6	protein_coding	20.7637	-1.96266	0.584048	-3.36045	0.000778168	0.00580113	Down Regulated in VP
ENSG00000180758	GPR157	protein_coding	71.2868	-0.610537	0.187406	-3.25783	0.00112268	0.00772509	Down Regulated in VP
ENSG00000188807	TMEM201	protein_coding	119.705	-1.16166	0.267242	-4.34684	1.3811e-05	0.000313459	Down Regulated in VP
ENSG00000178585	CTNNBIP1	protein_coding	459.466	-0.456315	0.125208	-3.64444	0.000267972	0.00263447	Down Regulated in VP
ENSG00000162441	LZIC	protein_coding	695.451	0.360368	0.101043	3.56649	0.000361791	0.00326403	Up Regulated in VP
ENSG00000054523	KIF1B	protein_coding	696.814	0.593658	0.152683	3.88816	0.000101005	0.00127562	Up Regulated in VP
ENSG00000198793	MTOR	protein_coding	1916.05	0.22498	0.0772792	2.91126	0.00359976	0.0188751	Up Regulated in VP
ENSG00000132879	FBXO44	protein_coding	701.426	-0.550618	0.209104	-2.63322	0.00845789	0.0364282	Down Regulated in VP
ENSG00000116670	MAD2L2	protein_coding	482.728	-0.46559	0.141405	-3.2926	0.000992659	0.00703708	Down Regulated in VP
ENSG00000177674	AGTRAP	protein_coding	1697.85	-0.765565	0.223869	-3.4197	0.000626892	0.00493656	Down Regulated in VP
ENSG00000116685	KIAA2013	protein_coding	1009.26	-0.321662	0.117456	-2.73858	0.0061706	0.0284873	Down Regulated in VP
ENSG00000116691	MIIP	protein_coding	715.153	-0.885283	0.244147	-3.62602	0.000287826	0.00275893	Down Regulated in VP
ENSG00000162496	DHRS3	protein_coding	323.885	-1.4598	0.295091	-4.94694	7.53901e-07	3.98556e-05	Down Regulated in VP
ENSG00000142634	EFHD2	protein_coding	5913.67	-0.793815	0.175005	-4.53595	5.73456e-06	0.000170269	Down Regulated in VP
ENSG00000116786	PLEKHM2	protein_coding	1902.83	-0.714522	0.170289	-4.19595	2.71729e-05	0.000498602	Down Regulated in VP
ENSG00000116809	ZBTB17	protein_coding	602.2	-0.729573	0.217082	-3.36082	0.000777111	0.00579574	Down Regulated in VP
ENSG00000142627	EPHA2	protein_coding	23.6565	-1.39867	0.42159	-3.3176	0.000907932	0.00656528	Down Regulated in VP
ENSG00000142632	ARHGEF19	protein_coding	162.981	-0.716447	0.215702	-3.32147	0.000895444	0.00650209	Down Regulated in VP
ENSG00000058453	CROCC	protein_coding	436.469	-1.08501	0.294402	-3.68547	0.000228282	0.00236464	Down Regulated in VP
ENSG00000159363	ATP13A2	protein_coding	634.154	-0.795858	0.195343	-4.07417	4.61797e-05	0.000730607	Down Regulated in VP
ENSG00000169991	IFFO2	protein_coding	888.198	-0.505691	0.183732	-2.75232	0.00591741	0.0275902	Down Regulated in VP
ENSG00000127481	UBR4	protein_coding	4126.48	0.28472	0.10798	2.6368	0.00836928	0.0361453	Up Regulated in VP
ENSG00000053371	AKR7A2	protein_coding	358.011	-0.511793	0.153332	-3.33781	0.000844427	0.00619816	Down Regulated in VP
ENSG00000040487	PQLC2	protein_coding	146.022	-0.831759	0.172904	-4.81053	1.50534e-06	6.33559e-05	Down Regulated in VP
ENSG00000077549	CAPZB	protein_coding	6324.53	0.240747	0.0912043	2.63965	0.00829924	0.0359323	Up Regulated in VP
ENSG00000173436	MICOS10	protein_coding	168.329	-0.292912	0.115786	-2.52978	0.0114132	0.0457585	Down Regulated in VP
ENSG00000158747	NBL1	protein_coding	44.7119	-1.18639	0.372622	-3.18389	0.00145311	0.00939936	Down Regulated in VP
ENSG00000162542	TMCO4	protein_coding	384.116	-0.4498	0.119135	-3.77555	0.000159656	0.00180172	Down Regulated in VP
ENSG00000162545	CAMK2N1	protein_coding	71.3273	-1.18801	0.310799	-3.82244	0.000132138	0.00156722	Down Regulated in VP
ENSG00000127483	HP1BP3	protein_coding	5983.57	0.237002	0.0933606	2.53856	0.0111309	0.0449969	Up Regulated in VP
ENSG00000075151	EIF4G3	protein_coding	2042.88	0.3795	0.138524	2.7396	0.00615142	0.0284214	Up Regulated in VP
ENSG00000133216	EPHB2	protein_coding	187.381	1.05403	0.403359	2.61314	0.00897148	0.038017	Up Regulated in VP
ENSG00000004487	KDM1A	protein_coding	1113.26	0.164214	0.0602774	2.7243	0.00644381	0.0294274	Up Regulated in VP
ENSG00000125944	HNRNPR	protein_coding	3745.94	0.241923	0.0714322	3.38675	0.000707247	0.00541484	Up Regulated in VP
ENSG00000125945	ZNF436	protein_coding	180.102	0.460869	0.153305	3.00623	0.00264511	0.0148916	Up Regulated in VP
ENSG00000204219	TCEA3	protein_coding	171.93	-1.30436	0.391426	-3.33234	0.000861195	0.00629293	Down Regulated in VP
ENSG00000007968	E2F2	protein_coding	306.389	0.804023	0.246462	3.26225	0.00110531	0.00762674	Up Regulated in VP
ENSG00000117318	ID3	protein_coding	65.0597	-1.39912	0.324806	-4.30755	1.65073e-05	0.000353014	Down Regulated in VP
ENSG00000142676	RPL11	protein_coding	32667.7	-0.472737	0.116147	-4.07017	4.69796e-05	0.000740809	Down Regulated in VP
ENSG00000011007	ELOA	protein_coding	1187.58	0.360218	0.114992	3.13255	0.00173293	0.0107395	Up Regulated in VP
ENSG00000011009	LYPLA2	protein_coding	847.79	-0.662076	0.165848	-3.99206	6.55006e-05	0.000932328	Down Regulated in VP
ENSG00000188822	CNR2	protein_coding	221.035	-0.686771	0.26509	-2.59071	0.00957791	0.0401356	Down Regulated in VP
ENSG00000185436	IFNLR1	protein_coding	237.422	0.763502	0.289451	2.63776	0.00834553	0.0360787	Up Regulated in VP
ENSG00000169504	CLIC4	protein_coding	1091.53	0.51449	0.196709	2.61549	0.00890986	0.0378391	Up Regulated in VP
ENSG00000117616	RSRP1	protein_coding	3960.57	-0.298629	0.112254	-2.66031	0.00780698	0.0341983	Down Regulated in VP
ENSG00000204178	MACO1	protein_coding	482.553	0.287803	0.0879392	3.27275	0.00106505	0.00741139	Up Regulated in VP
ENSG00000162430	SELENON	protein_coding	980.134	-0.48034	0.170238	-2.82157	0.00477887	0.0235147	Down Regulated in VP
ENSG00000117632	STMN1	protein_coding	760.304	0.546038	0.176486	3.09394	0.00197517	0.0118675	Up Regulated in VP
ENSG00000158062	UBXN11	protein_coding	3589.34	-0.784001	0.213999	-3.66357	0.000248721	0.00249478	Down Regulated in VP
ENSG00000176092	CRYBG2	protein_coding	36.4318	-1.54143	0.434442	-3.54806	0.000388078	0.0034441	Down Regulated in VP
ENSG00000176083	ZNF683	protein_coding	379.469	-1.24223	0.376614	-3.29842	0.000972307	0.00692679	Down Regulated in VP
ENSG00000204160	ZDHHC18	protein_coding	1665.62	-0.381254	0.105958	-3.59815	0.000320491	0.0029878	Down Regulated in VP
ENSG00000175707	KDF1	protein_coding	12.9512	-1.3253	0.466464	-2.84116	0.00449493	0.0224488	Down Regulated in VP
ENSG00000142784	WDTC1	protein_coding	2083.1	-0.373323	0.0934342	-3.99557	6.45395e-05	0.000923362	Down Regulated in VP
ENSG00000186501	TMEM222	protein_coding	615.887	-0.564097	0.134532	-4.19303	2.75254e-05	0.00050325	Down Regulated in VP
ENSG00000142765	SYTL1	protein_coding	2099.17	-1.19469	0.272167	-4.38955	1.13584e-05	0.0002774	Down Regulated in VP
ENSG00000142733	MAP3K6	protein_coding	183.137	-0.838642	0.180229	-4.65321	3.2681e-06	0.000111773	Down Regulated in VP
ENSG00000126705	AHDC1	protein_coding	223.413	-1.17106	0.251267	-4.66064	3.15233e-06	0.000109104	Down Regulated in VP
ENSG00000117758	STX12	protein_coding	1000.09	0.348477	0.135096	2.57948	0.00989479	0.0411946	Up Regulated in VP
ENSG00000117751	PPP1R8	protein_coding	895.653	0.306073	0.0893149	3.4269	0.000610525	0.00483402	Up Regulated in VP
ENSG00000126698	DNAJC8	protein_coding	2180.21	0.302667	0.0915546	3.30586	0.000946841	0.00679328	Up Regulated in VP
ENSG00000130770	ATP5IF1	protein_coding	654.585	-0.284329	0.102524	-2.7733	0.00554908	0.0262612	Down Regulated in VP
ENSG00000204138	PHACTR4	protein_coding	833.126	0.300015	0.0971153	3.08926	0.00200655	0.0120102	Up Regulated in VP
ENSG00000162419	GMEB1	protein_coding	465.289	0.497506	0.158808	3.13274	0.0017318	0.0107363	Up Regulated in VP
ENSG00000198492	YTHDF2	protein_coding	1688.36	0.316393	0.10454	3.02652	0.0024739	0.0141385	Up Regulated in VP
ENSG00000253304	TMEM200B	protein_coding	2.1883	2.28576	0.901475	2.53558	0.0112261	0.0452487	Up Regulated in VP
ENSG00000060688	SNRNP40	protein_coding	437.881	0.302471	0.0943889	3.20452	0.00135289	0.00889278	Up Regulated in VP
ENSG00000121753	ADGRB2	protein_coding	32.024	-1.37228	0.357761	-3.83576	0.000125179	0.00150007	Down Regulated in VP
ENSG00000084652	TXLNA	protein_coding	1048.1	0.263305	0.0843133	3.12293	0.00179061	0.0110143	Up Regulated in VP
ENSG00000225828	FAM229A	protein_coding	348.449	-0.653504	0.158394	-4.12582	3.69419e-05	0.000623125	Down Regulated in VP
ENSG00000176261	ZBTB8OS	protein_coding	480.275	0.246751	0.0983855	2.508	0.0121417	0.0480827	Up Regulated in VP
ENSG00000162521	RBBP4	protein_coding	2626.82	0.398095	0.107063	3.71833	0.000200543	0.00214259	Up Regulated in VP
ENSG00000162520	SYNC	protein_coding	7.73031	2.27776	0.816602	2.78932	0.00528194	0.0253288	Up Regulated in VP
ENSG00000134684	YARS	protein_coding	1864.85	0.294598	0.0962826	3.05973	0.00221538	0.0130131	Up Regulated in VP
ENSG00000116497	S100PBP	protein_coding	869.166	0.228432	0.0909905	2.5105	0.0120559	0.0478378	Up Regulated in VP
ENSG00000160097	FNDC5	protein_coding	2.70633	3.69146	0.932804	3.95738	7.57773e-05	0.00103562	Up Regulated in VP
ENSG00000004455	AK2	protein_coding	2562.43	0.254296	0.101894	2.4957	0.0125708	0.0493944	Up Regulated in VP
ENSG00000142920	AZIN2	protein_coding	66.247	-1.09638	0.328356	-3.33899	0.000840821	0.00617849	Down Regulated in VP
ENSG00000160094	ZNF362	protein_coding	380.527	-0.490318	0.130734	-3.75049	0.000176488	0.00194676	Down Regulated in VP
ENSG00000116544	DLGAP3	protein_coding	15.3303	-1.94832	0.359807	-5.41489	6.13267e-08	7.03316e-06	Down Regulated in VP
ENSG00000146463	ZMYM4	protein_coding	946.653	0.312846	0.0949401	3.2952	0.000983529	0.00698092	Up Regulated in VP
ENSG00000020129	NCDN	protein_coding	309.579	-0.473261	0.177581	-2.66504	0.00769782	0.033801	Down Regulated in VP
ENSG00000126067	PSMB2	protein_coding	1699.58	0.334315	0.119288	2.80259	0.00506946	0.024568	Up Regulated in VP
ENSG00000142686	C1orf216	protein_coding	285.321	0.365642	0.0958809	3.8135	0.000137011	0.00160742	Up Regulated in VP
ENSG00000092853	CLSPN	protein_coding	67.7888	1.74649	0.297446	5.87163	4.31531e-09	1.11038e-06	Up Regulated in VP
ENSG00000116871	MAP7D1	protein_coding	2228.69	-0.432753	0.129338	-3.34592	0.000820106	0.00605649	Down Regulated in VP
ENSG00000054118	THRAP3	protein_coding	2395.72	0.442472	0.0823206	5.37499	7.65869e-08	8.09767e-06	Up Regulated in VP
ENSG00000214193	SH3D21	protein_coding	26.7008	-0.935804	0.304478	-3.07347	0.00211585	0.0125491	Down Regulated in VP
ENSG00000142694	EVA1B	protein_coding	25.0782	-2.13437	0.565006	-3.77761	0.000158343	0.00179644	Down Regulated in VP
ENSG00000163874	ZC3H12A	protein_coding	998.613	-1.11273	0.227548	-4.89009	1.00788e-06	4.84093e-05	Down Regulated in VP
ENSG00000163879	DNALI1	protein_coding	2.40101	-1.80635	0.711084	-2.54028	0.0110764	0.0448541	Down Regulated in VP
ENSG00000134697	GNL2	protein_coding	923.126	0.374865	0.0912398	4.10857	3.98112e-05	0.00065808	Up Regulated in VP
ENSG00000134690	CDCA8	protein_coding	65.553	1.19981	0.299682	4.00361	6.23842e-05	0.000903711	Up Regulated in VP
ENSG00000196449	YRDC	protein_coding	597.876	-0.330205	0.11737	-2.81336	0.00490266	0.0239809	Down Regulated in VP
ENSG00000188786	MTF1	protein_coding	1099.51	0.466333	0.128677	3.62405	0.000290025	0.00277541	Up Regulated in VP
ENSG00000183431	SF3A3	protein_coding	1739.68	0.184302	0.0682997	2.69843	0.00696679	0.0312075	Up Regulated in VP
ENSG00000183520	UTP11	protein_coding	281.334	0.556701	0.129429	4.3012	1.69879e-05	0.00035619	Up Regulated in VP
ENSG00000214114	MYCBP	protein_coding	417.497	0.420712	0.127593	3.2973	0.000976205	0.0069403	Up Regulated in VP
ENSG00000116983	HPCAL4	protein_coding	145.172	-1.00953	0.380381	-2.654	0.00795437	0.0347348	Down Regulated in VP
ENSG00000198754	OXCT2	protein_coding	2.84069	3.3011	0.869027	3.79862	0.000145503	0.00168194	Up Regulated in VP
ENSG00000131236	CAP1	protein_coding	14416.9	0.403238	0.120311	3.35162	0.000803392	0.00595334	Up Regulated in VP
ENSG00000084073	ZMPSTE24	protein_coding	777.115	0.576222	0.150968	3.81685	0.000135167	0.00159442	Up Regulated in VP
ENSG00000049089	COL9A2	protein_coding	200.518	-1.1803	0.278344	-4.24043	2.23093e-05	0.000432711	Down Regulated in VP
ENSG00000117010	ZNF684	protein_coding	97.1328	0.522233	0.203858	2.56175	0.0104145	0.0427527	Up Regulated in VP
ENSG00000179862	CITED4	protein_coding	52.8826	-1.49376	0.386513	-3.86472	0.000111217	0.00137357	Down Regulated in VP
ENSG00000171793	CTPS1	protein_coding	406.401	0.648481	0.153312	4.22981	2.33893e-05	0.00044765	Up Regulated in VP
ENSG00000010803	SCMH1	protein_coding	336.151	-0.388654	0.121941	-3.18723	0.00143642	0.00931821	Down Regulated in VP
ENSG00000117399	CDC20	protein_coding	48.2632	1.8865	0.518513	3.63828	0.000274462	0.00267972	Up Regulated in VP
ENSG00000159479	MED8	protein_coding	511.824	0.394622	0.119017	3.31568	0.000914193	0.00659954	Up Regulated in VP
ENSG00000178922	HYI	protein_coding	136.818	-0.937937	0.25239	-3.71622	0.000202228	0.00215528	Down Regulated in VP
ENSG00000066135	KDM4A	protein_coding	439.819	0.51662	0.098179	5.26202	1.42479e-07	1.26051e-05	Up Regulated in VP
ENSG00000126091	ST3GAL3	protein_coding	39.1281	-1.06747	0.248119	-4.30223	1.69088e-05	0.000356148	Down Regulated in VP
ENSG00000117410	ATP6V0B	protein_coding	2687.57	-0.413258	0.158406	-2.60886	0.00908444	0.0384018	Down Regulated in VP
ENSG00000159214	CCDC24	protein_coding	52.1222	-0.638799	0.250678	-2.54829	0.0108253	0.0440223	Down Regulated in VP
ENSG00000178028	DMAP1	protein_coding	1295.31	-0.314968	0.0975676	-3.22821	0.0012457	0.00836899	Down Regulated in VP
ENSG00000117419	ERI3	protein_coding	498.485	-0.388389	0.0970298	-4.00278	6.26015e-05	0.000905346	Down Regulated in VP
ENSG00000187147	RNF220	protein_coding	1900.71	-0.373169	0.0665309	-5.60895	2.03552e-08	3.29869e-06	Down Regulated in VP
ENSG00000198520	ARMH1	protein_coding	435.377	-1.04554	0.289112	-3.61638	0.000298755	0.00283868	Down Regulated in VP
ENSG00000142945	KIF2C	protein_coding	53.4152	2.07362	0.423376	4.89783	9.69014e-07	4.74653e-05	Up Regulated in VP
ENSG00000142937	RPS8	protein_coding	26892.6	-0.606673	0.157379	-3.85486	0.000115798	0.00141205	Down Regulated in VP
ENSG00000173846	PLK3	protein_coding	1323.7	-1.02645	0.26878	-3.81892	0.000134039	0.00158543	Down Regulated in VP
ENSG00000117425	PTCH2	protein_coding	23.9769	-1.15374	0.317557	-3.63319	0.000279941	0.00271334	Down Regulated in VP
ENSG00000070785	EIF2B3	protein_coding	254.213	0.325185	0.0949494	3.42483	0.000615186	0.00485957	Up Regulated in VP
ENSG00000162415	ZSWIM5	protein_coding	78.0956	-0.874044	0.263991	-3.31088	0.000930022	0.00670265	Down Regulated in VP
ENSG00000132781	MUTYH	protein_coding	360.3	-0.572715	0.176701	-3.24115	0.00119047	0.0080857	Down Regulated in VP
ENSG00000117450	PRDX1	protein_coding	2037.34	0.460414	0.132144	3.48419	0.000493635	0.00410006	Up Regulated in VP
ENSG00000132780	NASP	protein_coding	1525.31	0.252134	0.0704667	3.57805	0.000346165	0.00316254	Up Regulated in VP
ENSG00000159588	CCDC17	protein_coding	66.4375	-0.681817	0.21891	-3.11459	0.00184198	0.0112663	Down Regulated in VP
ENSG00000159592	GPBP1L1	protein_coding	2935.63	0.362897	0.074573	4.86633	1.13691e-06	5.24308e-05	Up Regulated in VP
ENSG00000085999	RAD54L	protein_coding	23.1694	1.38709	0.329383	4.21119	2.54028e-05	0.000472213	Up Regulated in VP
ENSG00000142961	MOB3C	protein_coding	539.061	0.350019	0.109987	3.18237	0.00146074	0.00942211	Up Regulated in VP
ENSG00000123473	STIL	protein_coding	72.5254	1.33792	0.234419	5.7074	1.14715e-08	2.18589e-06	Up Regulated in VP
ENSG00000162373	BEND5	protein_coding	36.9511	-1.07385	0.311015	-3.45272	0.00055497	0.00450102	Down Regulated in VP
ENSG00000185104	FAF1	protein_coding	783.401	0.199441	0.0698089	2.85696	0.00427721	0.0215915	Up Regulated in VP
ENSG00000123080	CDKN2C	protein_coding	100.983	0.485848	0.174885	2.7781	0.00546773	0.0259663	Up Regulated in VP
ENSG00000085832	EPS15	protein_coding	2341.08	0.457857	0.125947	3.63531	0.000277648	0.00269802	Up Regulated in VP
ENSG00000117859	OSBPL9	protein_coding	1157.61	0.30799	0.0818672	3.76207	0.000168513	0.00188309	Up Regulated in VP
ENSG00000078618	NRDC	protein_coding	4453.46	0.297944	0.0937535	3.17795	0.00148321	0.00952456	Up Regulated in VP
ENSG00000117862	TXNDC12	protein_coding	115.602	-0.527317	0.159621	-3.30355	0.000954674	0.00682904	Down Regulated in VP
ENSG00000157077	ZFYVE9	protein_coding	50.5334	-1.10709	0.370693	-2.98655	0.00282143	0.0156505	Down Regulated in VP
ENSG00000085840	ORC1	protein_coding	59.2393	1.3133	0.300236	4.37423	1.21863e-05	0.000288474	Up Regulated in VP
ENSG00000134748	PRPF38A	protein_coding	1260.18	0.280926	0.0717126	3.91738	8.95163e-05	0.00117257	Up Regulated in VP
ENSG00000162377	COA7	protein_coding	142.39	0.608299	0.153844	3.954	7.68562e-05	0.00104443	Up Regulated in VP
ENSG00000121310	ECHDC2	protein_coding	859.77	-0.626912	0.199355	-3.1447	0.00166259	0.010389	Down Regulated in VP
ENSG00000116171	SCP2	protein_coding	2267.93	0.33047	0.128954	2.56269	0.0103866	0.0426685	Up Regulated in VP
ENSG00000162383	SLC1A7	protein_coding	76.4908	-1.5578	0.513775	-3.03206	0.00242888	0.0139413	Down Regulated in VP
ENSG00000157184	CPT2	protein_coding	268.577	0.49361	0.141621	3.48543	0.000491341	0.00408476	Up Regulated in VP
ENSG00000058804	NDC1	protein_coding	391.538	0.337475	0.11411	2.95746	0.00310181	0.0169049	Up Regulated in VP
ENSG00000058799	YIPF1	protein_coding	587.974	0.408712	0.129269	3.16173	0.00156837	0.00995081	Up Regulated in VP
ENSG00000081870	HSPB11	protein_coding	457.887	0.289732	0.109838	2.63781	0.00834441	0.0360787	Up Regulated in VP
ENSG00000157216	SSBP3	protein_coding	1582.38	-0.556499	0.162428	-3.42613	0.000612252	0.00484106	Down Regulated in VP
ENSG00000162390	ACOT11	protein_coding	17.6068	-0.911945	0.342791	-2.66035	0.0078059	0.0341983	Down Regulated in VP
ENSG00000243725	TTC4	protein_coding	29.3747	0.567445	0.190384	2.98052	0.00287756	0.015916	Up Regulated in VP
ENSG00000116133	DHCR24	protein_coding	230.037	0.705442	0.227512	3.10068	0.00193076	0.0116798	Up Regulated in VP
ENSG00000162402	USP24	protein_coding	3027.45	0.357875	0.126934	2.81939	0.00481155	0.0236372	Up Regulated in VP
ENSG00000162407	PLPP3	protein_coding	16.366	1.4078	0.481366	2.92458	0.0034492	0.0183182	Up Regulated in VP
ENSG00000177606	JUN	protein_coding	13481.1	-1.43172	0.253229	-5.65386	1.5688e-08	2.74326e-06	Down Regulated in VP
ENSG00000132849	PATJ	protein_coding	436.63	-0.653151	0.234915	-2.78038	0.0054296	0.0258401	Down Regulated in VP
ENSG00000162607	USP1	protein_coding	1235.28	0.493094	0.126389	3.90141	9.56331e-05	0.00122563	Up Regulated in VP
ENSG00000088035	ALG6	protein_coding	397.226	0.314623	0.114198	2.75506	0.00586819	0.0274373	Up Regulated in VP
ENSG00000162437	RAVER2	protein_coding	106.267	-1.55556	0.523911	-2.96914	0.00298639	0.0163892	Down Regulated in VP
ENSG00000116704	SLC35D1	protein_coding	539.119	0.386831	0.139131	2.78033	0.00543039	0.0258401	Up Regulated in VP
ENSG00000142864	SERBP1	protein_coding	3462.34	0.357695	0.0829527	4.31204	1.61754e-05	0.000348857	Up Regulated in VP
ENSG00000024526	DEPDC1	protein_coding	16.7948	1.73123	0.521627	3.31891	0.000903711	0.00654294	Up Regulated in VP
ENSG00000033122	LRRC7	protein_coding	8.3064	-2.27687	0.794095	-2.86725	0.00414057	0.0209934	Down Regulated in VP
ENSG00000066557	LRRC40	protein_coding	304.253	0.411693	0.125861	3.27102	0.00107162	0.0074387	Up Regulated in VP
ENSG00000178965	ERICH3	protein_coding	15.4502	1.91828	0.656684	2.92117	0.00348724	0.0184638	Up Regulated in VP
ENSG00000162623	TYW3	protein_coding	472.489	0.315976	0.10779	2.9314	0.00337442	0.018059	Up Regulated in VP
ENSG00000117054	ACADM	protein_coding	775.76	0.457428	0.11851	3.85982	0.00011347	0.00139248	Up Regulated in VP
ENSG00000162614	NEXN	protein_coding	214.182	1.02485	0.318885	3.21385	0.00130966	0.00868435	Up Regulated in VP
ENSG00000137959	IFI44L	protein_coding	4392.55	2.23631	0.507536	4.40621	1.05193e-05	0.000263972	Up Regulated in VP
ENSG00000137965	IFI44	protein_coding	2240.65	1.46542	0.346932	4.22394	2.40068e-05	0.000454948	Up Regulated in VP
ENSG00000142875	PRKACB	protein_coding	2086.36	0.514353	0.159552	3.22372	0.00126536	0.00846621	Up Regulated in VP
ENSG00000174021	GNG5	protein_coding	157.822	-1.00987	0.229127	-4.40746	1.0459e-05	0.00026322	Down Regulated in VP
ENSG00000097033	SH3GLB1	protein_coding	2893	0.408809	0.126951	3.22021	0.00128097	0.00852474	Up Regulated in VP
ENSG00000153936	HS2ST1	protein_coding	537.701	0.476873	0.112031	4.25662	2.07545e-05	0.00041329	Up Regulated in VP
ENSG00000143013	LMO4	protein_coding	620.841	0.289961	0.11415	2.54017	0.0110798	0.0448571	Up Regulated in VP
ENSG00000137947	GTF2B	protein_coding	856.437	0.499229	0.155029	3.22024	0.00128084	0.00852474	Up Regulated in VP
ENSG00000137944	KYAT3	protein_coding	575.646	0.342044	0.136698	2.50219	0.0123429	0.0487197	Up Regulated in VP
ENSG00000117226	GBP3	protein_coding	946.677	0.853474	0.175984	4.84972	1.23635e-06	5.5684e-05	Up Regulated in VP
ENSG00000117228	GBP1	protein_coding	2731.38	1.66454	0.298844	5.56992	2.54851e-08	3.80958e-06	Up Regulated in VP
ENSG00000162645	GBP2	protein_coding	6555.65	0.735484	0.197116	3.73123	0.000190544	0.0020689	Up Regulated in VP
ENSG00000162654	GBP4	protein_coding	3320.74	1.12546	0.21812	5.15984	2.4716e-07	1.86337e-05	Up Regulated in VP
ENSG00000197147	LRRC8B	protein_coding	314.75	0.435225	0.162844	2.67265	0.00752546	0.0331786	Up Regulated in VP
ENSG00000189195	BTBD8	protein_coding	104.617	-0.526752	0.18159	-2.90078	0.00372233	0.0194004	Down Regulated in VP
ENSG00000122406	RPL5	protein_coding	27621.6	-0.448121	0.129409	-3.46283	0.000534526	0.00437615	Down Regulated in VP
ENSG00000154511	DIPK1A	protein_coding	242.249	0.572489	0.161651	3.54151	0.000397839	0.00350179	Up Regulated in VP
ENSG00000143033	MTF2	protein_coding	803.452	0.307092	0.102729	2.98933	0.00279593	0.0155389	Up Regulated in VP
ENSG00000117500	TMED5	protein_coding	2249.4	0.468796	0.157805	2.97073	0.00297093	0.0163232	Up Regulated in VP
ENSG00000117505	DR1	protein_coding	2087.08	0.455949	0.116794	3.90385	9.46734e-05	0.00121838	Up Regulated in VP
ENSG00000137936	BCAR3	protein_coding	34.1585	1.19711	0.454816	2.63208	0.00848632	0.0365415	Up Regulated in VP
ENSG00000172339	ALG14	protein_coding	68.4079	0.44454	0.175397	2.53448	0.0112613	0.0453491	Up Regulated in VP
ENSG00000188641	DPYD	protein_coding	3179.27	0.751294	0.240984	3.11761	0.00182326	0.0111834	Up Regulated in VP
ENSG00000137996	RTCA	protein_coding	614.91	0.303879	0.0921401	3.29801	0.000973741	0.00693131	Up Regulated in VP
ENSG00000117543	DPH5	protein_coding	611.268	-0.320565	0.124971	-2.56512	0.0103141	0.0424711	Down Regulated in VP
ENSG00000198890	PRMT6	protein_coding	156.495	0.530839	0.169594	3.13006	0.00174771	0.0108195	Up Regulated in VP
ENSG00000162631	NTNG1	protein_coding	3.38068	-4.85904	1.09959	-4.41898	9.91698e-06	0.000254952	Down Regulated in VP
ENSG00000121957	GPSM2	protein_coding	58.4075	0.803917	0.236053	3.40566	0.000660046	0.00514059	Up Regulated in VP
ENSG00000134243	SORT1	protein_coding	1543.8	0.734973	0.250793	2.93059	0.00338316	0.0180727	Up Regulated in VP
ENSG00000143106	PSMA5	protein_coding	1754.19	0.465355	0.102939	4.5207	6.16343e-06	0.000179319	Up Regulated in VP
ENSG00000065135	GNAI3	protein_coding	2450.41	0.493131	0.174078	2.83281	0.00461402	0.0228984	Up Regulated in VP
ENSG00000168710	AHCYL1	protein_coding	1599.38	0.368252	0.134118	2.74572	0.00603774	0.0279857	Up Regulated in VP
ENSG00000143119	CD53	protein_coding	12721.7	0.389668	0.112526	3.46291	0.000534376	0.00437615	Up Regulated in VP
ENSG00000121931	LRIF1	protein_coding	277.372	0.546094	0.17092	3.19502	0.00139821	0.00912493	Up Regulated in VP
ENSG00000085465	OVGP1	protein_coding	99.9923	-0.936831	0.231938	-4.03915	5.36456e-05	0.000812854	Down Regulated in VP
ENSG00000282608	ADORA3	protein_coding	13.7823	1.62321	0.519988	3.12164	0.00179846	0.0110512	Up Regulated in VP
ENSG00000134245	WNT2B	protein_coding	12.5804	-1.11457	0.427737	-2.60573	0.00916779	0.0386881	Down Regulated in VP
ENSG00000116489	CAPZA1	protein_coding	3858.64	0.657404	0.170373	3.85863	0.000114026	0.00139831	Up Regulated in VP
ENSG00000155380	SLC16A1	protein_coding	231.04	0.695003	0.192502	3.61036	0.000305772	0.00288785	Up Regulated in VP
ENSG00000116793	PHTF1	protein_coding	270.867	0.501107	0.112847	4.44058	8.97184e-06	0.000235358	Up Regulated in VP
ENSG00000134242	PTPN22	protein_coding	1901.67	0.542418	0.194191	2.79321	0.00521871	0.0251228	Up Regulated in VP
ENSG00000118655	DCLRE1B	protein_coding	198.548	0.445333	0.161725	2.75364	0.00589363	0.0275163	Up Regulated in VP
ENSG00000116752	BCAS2	protein_coding	677.378	0.386014	0.140585	2.74577	0.00603694	0.0279857	Up Regulated in VP
ENSG00000116748	AMPD1	protein_coding	0.811271	3.69541	1.31619	2.80765	0.00499044	0.0242869	Up Regulated in VP
ENSG00000213281	NRAS	protein_coding	2437.43	0.422312	0.163549	2.58217	0.009818	0.0409419	Up Regulated in VP
ENSG00000173218	VANGL1	protein_coding	175.14	0.665722	0.260993	2.55072	0.0107499	0.0437883	Up Regulated in VP
ENSG00000116830	TTF2	protein_coding	461.718	0.546972	0.161116	3.3949	0.000686546	0.00529098	Up Regulated in VP
ENSG00000198162	MAN1A2	protein_coding	1657.68	0.419117	0.120142	3.48852	0.000485701	0.00405915	Up Regulated in VP
ENSG00000196505	GDAP2	protein_coding	518.473	0.461498	0.136113	3.39055	0.000697527	0.00536607	Up Regulated in VP
ENSG00000065183	WDR3	protein_coding	445.372	0.529787	0.092745	5.7123	1.1146e-08	2.16454e-06	Up Regulated in VP
ENSG00000116874	WARS2	protein_coding	105.262	0.678099	0.144163	4.7037	2.55488e-06	9.40406e-05	Up Regulated in VP
ENSG00000134250	NOTCH2	protein_coding	7468.12	0.460939	0.165831	2.77957	0.00544306	0.0258796	Up Regulated in VP
ENSG00000265808	SEC22B	protein_coding	1073.57	0.372161	0.109169	3.40905	0.000651886	0.00509406	Up Regulated in VP
ENSG00000188610	FAM72B	protein_coding	29.9448	1.04994	0.316303	3.31941	0.000902079	0.00653932	Up Regulated in VP
ENSG00000266338	NBPF15	protein_coding	1046.23	-0.672714	0.235641	-2.85482	0.00430612	0.0217058	Down Regulated in VP
ENSG00000162825	NBPF20	protein_coding	114.53	-0.534145	0.168243	-3.17483	0.00149923	0.00959994	Down Regulated in VP
ENSG00000117281	CD160	protein_coding	619.143	0.888996	0.345576	2.5725	0.0100966	0.0418127	Up Regulated in VP
ENSG00000131788	PIAS3	protein_coding	576.055	-0.247788	0.0963711	-2.57119	0.0101351	0.0419232	Down Regulated in VP
ENSG00000265241	RBM8A	protein_coding	1803.65	0.221473	0.0809737	2.73512	0.00623574	0.0286716	Up Regulated in VP
ENSG00000271425	NBPF10	protein_coding	518.008	0.459821	0.150756	3.05009	0.00228773	0.0133526	Up Regulated in VP
ENSG00000263956	NBPF11	protein_coding	668.323	-0.315376	0.11177	-2.82164	0.00477783	0.0235147	Down Regulated in VP
ENSG00000150337	FCGR1A	protein_coding	764.448	0.956247	0.357638	2.67378	0.00750007	0.0330919	Up Regulated in VP
ENSG00000203814	HIST2H2BF	protein_coding	29.303	-0.94867	0.32466	-2.92205	0.00347741	0.0184315	Down Regulated in VP
ENSG00000178096	BOLA1	protein_coding	64.1493	-0.733988	0.201898	-3.63545	0.000277499	0.00269802	Down Regulated in VP
ENSG00000118292	C1orf54	protein_coding	73.8111	-0.690559	0.207386	-3.32983	0.000868996	0.00633126	Down Regulated in VP
ENSG00000159208	CIART	protein_coding	8.81296	-1.31965	0.452302	-2.91764	0.00352693	0.0186001	Down Regulated in VP
ENSG00000266472	MRPS21	protein_coding	938.541	-0.257994	0.0938482	-2.74905	0.0059768	0.0277626	Down Regulated in VP
ENSG00000143387	CTSK	protein_coding	274.234	-0.437361	0.165512	-2.64247	0.00823042	0.0356967	Down Regulated in VP
ENSG00000143437	ARNT	protein_coding	1166.36	0.434993	0.103606	4.19854	2.68647e-05	0.000495041	Up Regulated in VP
ENSG00000143398	PIP5K1A	protein_coding	1063.87	0.361076	0.0810575	4.45457	8.40625e-06	0.000223908	Up Regulated in VP
ENSG00000143373	ZNF687	protein_coding	940.209	-0.57967	0.141693	-4.09104	4.29452e-05	0.000691429	Down Regulated in VP
ENSG00000143390	RFX5	protein_coding	2139.23	0.201903	0.0706527	2.85768	0.0042675	0.021555	Up Regulated in VP
ENSG00000159445	THEM4	protein_coding	871.442	-0.646805	0.205117	-3.15335	0.00161408	0.01017	Down Regulated in VP
ENSG00000197956	S100A6	protein_coding	8506.64	-0.437484	0.16078	-2.72101	0.00650832	0.0296283	Down Regulated in VP
ENSG00000198837	DENND4B	protein_coding	4863.59	-0.323503	0.117535	-2.7524	0.00591593	0.0275902	Down Regulated in VP
ENSG00000160741	CRTC2	protein_coding	2310.71	-0.41431	0.0973404	-4.2563	2.07837e-05	0.00041329	Down Regulated in VP
ENSG00000177954	RPS27	protein_coding	46856.7	-0.587652	0.143502	-4.09508	4.22014e-05	0.000681538	Down Regulated in VP
ENSG00000160710	ADAR	protein_coding	9923.29	0.669647	0.116838	5.7314	9.96042e-09	2.00922e-06	Up Regulated in VP
ENSG00000143603	KCNN3	protein_coding	17.0457	1.83323	0.573798	3.19491	0.00139874	0.00912497	Up Regulated in VP
ENSG00000163346	PBXIP1	protein_coding	4697.44	-0.757429	0.166104	-4.55997	5.11612e-06	0.000157293	Down Regulated in VP
ENSG00000173207	CKS1B	protein_coding	153.318	0.572839	0.147304	3.88882	0.000100734	0.00127313	Up Regulated in VP
ENSG00000160685	ZBTB7B	protein_coding	1975.78	-0.400242	0.159044	-2.51656	0.0118508	0.047229	Down Regulated in VP
ENSG00000143537	ADAM15	protein_coding	1578.59	-0.626293	0.181253	-3.45535	0.000549572	0.00446979	Down Regulated in VP
ENSG00000179085	DPM3	protein_coding	94.2995	-1.38472	0.317471	-4.36172	1.29042e-05	0.000300347	Down Regulated in VP
ENSG00000163462	TRIM46	protein_coding	90.3502	-1.04526	0.291214	-3.58931	0.000331557	0.00305808	Down Regulated in VP
ENSG00000169231	THBS3	protein_coding	494.056	-0.57115	0.151845	-3.7614	0.000168967	0.00188574	Down Regulated in VP
ENSG00000160767	FAM189B	protein_coding	210.642	-0.499452	0.180965	-2.75994	0.00578119	0.0271595	Down Regulated in VP
ENSG00000160753	RUSC1	protein_coding	359.64	-0.470425	0.109239	-4.30639	1.65938e-05	0.00035322	Down Regulated in VP
ENSG00000163374	YY1AP1	protein_coding	1519.75	0.246251	0.0708537	3.47548	0.000509936	0.00420261	Up Regulated in VP
ENSG00000132718	SYT11	protein_coding	1078.65	0.486547	0.189498	2.56756	0.0102416	0.0422546	Up Regulated in VP
ENSG00000160789	LMNA	protein_coding	678.92	-1.34771	0.383792	-3.51156	0.000445489	0.00378933	Down Regulated in VP
ENSG00000160785	SLC25A44	protein_coding	731.958	0.425127	0.102149	4.16183	3.15713e-05	0.000554095	Up Regulated in VP
ENSG00000160783	PMF1	protein_coding	322.404	-0.508563	0.125464	-4.05345	5.04686e-05	0.000779275	Down Regulated in VP
ENSG00000143319	ISG20L2	protein_coding	999.133	0.279413	0.109942	2.54146	0.0110391	0.0447553	Up Regulated in VP
ENSG00000143303	RRNAD1	protein_coding	427.408	-0.287744	0.110109	-2.61326	0.00896844	0.0380134	Down Regulated in VP
ENSG00000163565	IFI16	protein_coding	4604.06	0.787004	0.147239	5.34509	9.03734e-08	9.16417e-06	Up Regulated in VP
ENSG00000163568	AIM2	protein_coding	307.436	0.801713	0.210542	3.80785	0.000140179	0.00163794	Up Regulated in VP
ENSG00000179639	FCER1A	protein_coding	514.135	-1.12259	0.413043	-2.71785	0.00657081	0.0298736	Down Regulated in VP
ENSG00000158716	DUSP23	protein_coding	147.814	-0.741128	0.184279	-4.02177	5.7762e-05	0.000858999	Down Regulated in VP
ENSG00000213085	CFAP45	protein_coding	35.9771	-1.102	0.356377	-3.09222	0.00198666	0.0119158	Down Regulated in VP
ENSG00000158710	TAGLN2	protein_coding	13202.3	-0.471609	0.182812	-2.57975	0.00988718	0.0411729	Down Regulated in VP
ENSG00000162729	IGSF8	protein_coding	524.75	-0.991988	0.222185	-4.46469	8.01853e-06	0.000216575	Down Regulated in VP
ENSG00000122218	COPA	protein_coding	3521.36	0.604725	0.115341	5.24295	1.58028e-07	1.35654e-05	Up Regulated in VP
ENSG00000162739	SLAMF6	protein_coding	2492.6	0.540037	0.208932	2.58475	0.009745	0.0406784	Up Regulated in VP
ENSG00000066294	CD84	protein_coding	2683.4	0.616357	0.187948	3.2794	0.00104026	0.00727053	Up Regulated in VP
ENSG00000026751	SLAMF7	protein_coding	3324.05	0.935388	0.229944	4.0679	4.74388e-05	0.000746451	Up Regulated in VP
ENSG00000270149	AL591806.3	protein_coding	3.95998	-1.82708	0.649491	-2.8131	0.00490669	0.023987	Down Regulated in VP
ENSG00000215845	TSTD1	protein_coding	308.981	-1.09968	0.261176	-4.2105	2.54808e-05	0.000473058	Down Regulated in VP
ENSG00000143258	USP21	protein_coding	834.922	-0.365399	0.119831	-3.04929	0.00229384	0.0133698	Down Regulated in VP
ENSG00000143224	PPOX	protein_coding	481.121	-0.436676	0.147596	-2.9586	0.00309041	0.0168621	Down Regulated in VP
ENSG00000143252	SDHC	protein_coding	1419.65	0.251091	0.100014	2.51056	0.0120541	0.0478378	Up Regulated in VP
ENSG00000143226	FCGR2A	protein_coding	3156.08	0.741728	0.270939	2.73762	0.00618852	0.0285272	Up Regulated in VP
ENSG00000203747	FCGR3A	protein_coding	10964.6	0.846779	0.301928	2.80458	0.00503827	0.0244579	Up Regulated in VP
ENSG00000118217	ATF6	protein_coding	1560.2	0.305596	0.115547	2.64479	0.00817426	0.0354886	Up Regulated in VP
ENSG00000117143	UAP1	protein_coding	477.466	0.541678	0.199153	2.71991	0.00652993	0.0297111	Up Regulated in VP
ENSG00000143228	NUF2	protein_coding	54.5605	1.25108	0.272435	4.59222	4.38552e-06	0.000139532	Up Regulated in VP
ENSG00000143149	ALDH9A1	protein_coding	1092.2	0.385463	0.114735	3.3596	0.00078056	0.00581397	Up Regulated in VP
ENSG00000143183	TMCO1	protein_coding	1199.34	0.630901	0.114325	5.51849	3.41918e-08	4.78133e-06	Up Regulated in VP
ENSG00000143157	POGK	protein_coding	1505.18	0.220819	0.0865917	2.55011	0.0107688	0.043844	Up Regulated in VP
ENSG00000143155	TIPRL	protein_coding	720.239	0.470638	0.0831443	5.6605	1.50934e-08	2.67061e-06	Up Regulated in VP
ENSG00000117475	BLZF1	protein_coding	372.175	0.433988	0.120078	3.61421	0.000301261	0.0028604	Up Regulated in VP
ENSG00000010165	EEF1AKNMT	protein_coding	399.431	0.554729	0.157692	3.51781	0.000435121	0.00372081	Up Regulated in VP
ENSG00000117560	FASLG	protein_coding	111.967	1.14027	0.275549	4.13818	3.50065e-05	0.000597806	Up Regulated in VP
ENSG00000117593	DARS2	protein_coding	209.702	0.842749	0.14444	5.83459	5.39244e-09	1.24673e-06	Up Regulated in VP
ENSG00000152061	RABGAP1L	protein_coding	2702.25	0.410087	0.147425	2.78167	0.00540804	0.0257554	Up Regulated in VP
ENSG00000120333	MRPS14	protein_coding	303.912	0.396548	0.080103	4.95048	7.4032e-07	3.93071e-05	Up Regulated in VP
ENSG00000235750	KIAA0040	protein_coding	1906.46	0.336122	0.131989	2.54659	0.0108781	0.0442056	Up Regulated in VP
ENSG00000143207	COP1	protein_coding	937.164	0.418023	0.129553	3.22665	0.00125248	0.00840153	Up Regulated in VP
ENSG00000057252	SOAT1	protein_coding	1356.6	0.376051	0.129059	2.91379	0.00357067	0.0187736	Up Regulated in VP
ENSG00000162779	AXDND1	protein_coding	0.918984	3.40244	1.22212	2.78404	0.00536866	0.0256171	Up Regulated in VP
ENSG00000143337	TOR1AIP1	protein_coding	1855.9	0.608933	0.136143	4.47275	7.72184e-06	0.000211193	Up Regulated in VP
ENSG00000135837	CEP350	protein_coding	2323.26	0.404213	0.114648	3.52568	0.000422393	0.00364662	Up Regulated in VP
ENSG00000230124	ACBD6	protein_coding	652.994	-0.328669	0.0898384	-3.65845	0.000253748	0.00252668	Down Regulated in VP
ENSG00000143324	XPR1	protein_coding	638.822	0.453925	0.145192	3.12637	0.00176979	0.0109154	Up Regulated in VP
ENSG00000153029	MR1	protein_coding	1582.81	0.599708	0.11534	5.19949	1.99831e-07	1.61166e-05	Up Regulated in VP
ENSG00000162783	IER5	protein_coding	2743.35	-0.623559	0.15792	-3.94858	7.86152e-05	0.00106167	Down Regulated in VP
ENSG00000135828	RNASEL	protein_coding	477.153	0.460313	0.145359	3.16672	0.00154168	0.00983542	Up Regulated in VP
ENSG00000135829	DHX9	protein_coding	4654.82	0.359915	0.087878	4.09562	4.21039e-05	0.000681046	Up Regulated in VP
ENSG00000116698	SMG7	protein_coding	2360.86	0.237465	0.0824566	2.87988	0.00397828	0.0203912	Up Regulated in VP
ENSG00000162704	ARPC5	protein_coding	5791.13	0.427644	0.170785	2.50399	0.0122802	0.0484945	Up Regulated in VP
ENSG00000116406	EDEM3	protein_coding	1281.72	0.426106	0.113942	3.73968	0.000184252	0.002017	Up Regulated in VP
ENSG00000121486	TRMT1L	protein_coding	290.214	0.46847	0.109307	4.28581	1.82074e-05	0.000374961	Up Regulated in VP
ENSG00000047410	TPR	protein_coding	4659.82	0.296446	0.0916428	3.2348	0.00121729	0.00822597	Up Regulated in VP
ENSG00000116711	PLA2G4A	protein_coding	105.03	1.02672	0.311971	3.29106	0.000998107	0.00706992	Up Regulated in VP
ENSG00000127074	RGS13	protein_coding	33.009	3.59866	0.890385	4.04168	5.30692e-05	0.00080721	Up Regulated in VP
ENSG00000116750	UCHL5	protein_coding	683.972	0.419228	0.140424	2.98544	0.00283174	0.0157027	Up Regulated in VP
ENSG00000134371	CDC73	protein_coding	932.113	0.349534	0.135817	2.57357	0.0100657	0.0417257	Up Regulated in VP
ENSG00000000971	CFH	protein_coding	176.625	-1.45362	0.4732	-3.0719	0.00212704	0.0125966	Down Regulated in VP
ENSG00000066279	ASPM	protein_coding	82.1448	2.14033	0.33422	6.40396	1.51398e-10	8.71557e-08	Up Regulated in VP
ENSG00000213047	DENND1B	protein_coding	684.902	0.530336	0.158353	3.34908	0.000810814	0.00600064	Up Regulated in VP
ENSG00000151414	NEK7	protein_coding	1747.5	0.457684	0.160803	2.84624	0.00442392	0.0221515	Up Regulated in VP
ENSG00000081237	PTPRC	protein_coding	37550.9	0.501479	0.123904	4.04731	5.18089e-05	0.000795278	Up Regulated in VP
ENSG00000118193	KIF14	protein_coding	28.9909	2.06436	0.405086	5.0961	3.46721e-07	2.40268e-05	Up Regulated in VP
ENSG00000163435	ELF3	protein_coding	35.5303	-0.983911	0.238295	-4.12896	3.64414e-05	0.000617687	Down Regulated in VP
ENSG00000077152	UBE2T	protein_coding	43.2598	1.03505	0.279134	3.70806	0.000208856	0.00220961	Up Regulated in VP
ENSG00000077157	PPP1R12B	protein_coding	536.582	0.312096	0.117861	2.64801	0.00809661	0.0352301	Up Regulated in VP
ENSG00000183155	RABIF	protein_coding	293.821	0.48428	0.113937	4.25043	2.13356e-05	0.000420007	Up Regulated in VP
ENSG00000117153	KLHL12	protein_coding	878.946	0.304576	0.0806825	3.77499	0.000160011	0.00180403	Up Regulated in VP
ENSG00000143847	PPFIA4	protein_coding	42.4195	-1.2414	0.390587	-3.17828	0.00148149	0.00951801	Down Regulated in VP
ENSG00000122188	LAX1	protein_coding	547.654	0.556362	0.186514	2.98295	0.00285488	0.01581	Up Regulated in VP
ENSG00000143845	ETNK2	protein_coding	28.4625	-1.32361	0.314722	-4.20566	2.60323e-05	0.00048175	Down Regulated in VP
ENSG00000117222	RBBP5	protein_coding	445.366	0.571575	0.136328	4.19265	2.75714e-05	0.00050325	Up Regulated in VP
ENSG00000163545	NUAK2	protein_coding	664.37	-0.544683	0.210956	-2.58197	0.00982375	0.040948	Down Regulated in VP
ENSG00000117266	CDK18	protein_coding	94.5057	-0.671537	0.259787	-2.58495	0.00973939	0.0406648	Down Regulated in VP
ENSG00000158715	SLC45A3	protein_coding	42.4911	-0.919423	0.322358	-2.85218	0.00434205	0.0218172	Down Regulated in VP
ENSG00000117280	RAB29	protein_coding	2202.25	0.354611	0.137989	2.56985	0.0101743	0.0420252	Up Regulated in VP
ENSG00000266028	SRGAP2	protein_coding	1326.78	0.405042	0.139373	2.90617	0.00365885	0.0191386	Up Regulated in VP
ENSG00000143486	EIF2D	protein_coding	1275.11	-0.340622	0.113615	-2.99803	0.00271733	0.0151848	Down Regulated in VP
ENSG00000136634	IL10	protein_coding	51.4177	1.85529	0.64173	2.89108	0.00383923	0.0198191	Up Regulated in VP
ENSG00000196352	CD55	protein_coding	2936.14	0.542259	0.200024	2.71097	0.00670862	0.0303648	Up Regulated in VP
ENSG00000117335	CD46	protein_coding	5023.36	0.338137	0.135591	2.49379	0.0126387	0.0496049	Up Regulated in VP
ENSG00000117650	NEK2	protein_coding	22.7238	2.62247	0.392744	6.67729	2.434e-11	2.00979e-08	Up Regulated in VP
ENSG00000143493	INTS7	protein_coding	364.312	0.819072	0.148678	5.50904	3.60786e-08	4.92601e-06	Up Regulated in VP
ENSG00000143476	DTL	protein_coding	64.8389	2.4138	0.370017	6.5235	6.86857e-11	4.76404e-08	Up Regulated in VP
ENSG00000203705	TATDN3	protein_coding	362.303	0.408638	0.138935	2.94122	0.00326924	0.0176381	Up Regulated in VP
ENSG00000136643	RPS6KC1	protein_coding	610.849	0.58555	0.147328	3.97446	7.05392e-05	0.000983239	Up Regulated in VP
ENSG00000117724	CENPF	protein_coding	165.085	1.41953	0.261822	5.42175	5.90193e-08	6.82403e-06	Up Regulated in VP
ENSG00000136628	EPRS	protein_coding	2200.9	0.501578	0.0943891	5.31394	1.07279e-07	1.0221e-05	Up Regulated in VP
ENSG00000118873	RAB3GAP2	protein_coding	1103.45	0.264952	0.0957704	2.76653	0.00566559	0.0267105	Up Regulated in VP
ENSG00000162817	C1orf115	protein_coding	34.9788	-1.21646	0.408911	-2.97488	0.00293102	0.0161448	Down Regulated in VP
ENSG00000154305	MIA3	protein_coding	2104.06	0.440523	0.0863379	5.10231	3.3553e-07	2.35976e-05	Up Regulated in VP
ENSG00000187554	TLR5	protein_coding	481.667	0.958727	0.269988	3.551	0.000383771	0.00341612	Up Regulated in VP
ENSG00000143502	SUSD4	protein_coding	93.9495	-1.21708	0.414951	-2.93308	0.00335623	0.0180004	Down Regulated in VP
ENSG00000143756	FBXO28	protein_coding	688.121	0.268432	0.0936736	2.86561	0.00416205	0.02109	Up Regulated in VP
ENSG00000143753	DEGS1	protein_coding	1141.06	0.334943	0.0911805	3.6734	0.000239341	0.00244272	Up Regulated in VP
ENSG00000143771	CNIH4	protein_coding	538.271	0.394617	0.157516	2.50526	0.0122362	0.0483648	Up Regulated in VP
ENSG00000143815	LBR	protein_coding	2667.22	0.723448	0.111423	6.4928	8.42578e-11	5.61935e-08	Up Regulated in VP
ENSG00000154380	ENAH	protein_coding	8.19476	-1.54719	0.565218	-2.73733	0.00619406	0.0285272	Down Regulated in VP
ENSG00000182827	ACBD3	protein_coding	895.442	0.451086	0.139995	3.22214	0.00127235	0.00848971	Up Regulated in VP
ENSG00000185155	MIXL1	protein_coding	9.2586	2.10013	0.684595	3.06769	0.00215718	0.012749	Up Regulated in VP
ENSG00000143799	PARP1	protein_coding	2567.84	0.429354	0.112127	3.82918	0.000128569	0.00153539	Up Regulated in VP
ENSG00000143772	ITPKB	protein_coding	2711.85	-0.659983	0.172416	-3.82786	0.000129263	0.00154152	Down Regulated in VP
ENSG00000163050	COQ8A	protein_coding	991.618	-0.560439	0.140838	-3.97931	6.91154e-05	0.000969629	Down Regulated in VP
ENSG00000143761	ARF1	protein_coding	7166.27	-0.375851	0.128388	-2.92745	0.00341756	0.0182004	Down Regulated in VP
ENSG00000143793	C1orf35	protein_coding	185.801	-0.834436	0.205298	-4.0645	4.81352e-05	0.000753308	Down Regulated in VP
ENSG00000162910	MRPL55	protein_coding	360.613	-1.10386	0.188795	-5.84689	5.00847e-09	1.18968e-06	Down Regulated in VP
ENSG00000143774	GUK1	protein_coding	2257.87	-1.00619	0.22235	-4.52525	6.03233e-06	0.000177329	Down Regulated in VP
ENSG00000154358	OBSCN	protein_coding	805.368	-1.21637	0.396861	-3.06499	0.0021768	0.0128387	Down Regulated in VP
ENSG00000181218	HIST3H2A	protein_coding	84.7851	-0.698961	0.252072	-2.77287	0.00555647	0.026289	Down Regulated in VP
ENSG00000196890	HIST3H2BB	protein_coding	7.12253	-1.38984	0.546653	-2.54246	0.0110076	0.0446522	Down Regulated in VP
ENSG00000168159	RNF187	protein_coding	1276.83	-0.368796	0.0975183	-3.78181	0.00015569	0.00177609	Down Regulated in VP
ENSG00000173409	ARV1	protein_coding	198.485	0.466349	0.184966	2.52127	0.0116932	0.046736	Up Regulated in VP
ENSG00000143633	C1orf131	protein_coding	257.604	0.510838	0.167096	3.05715	0.00223451	0.0131031	Up Regulated in VP
ENSG00000270106	TSNAX-DISC1	protein_coding	0.96998	3.09844	1.19212	2.5991	0.00934696	0.0393485	Up Regulated in VP
ENSG00000116918	TSNAX	protein_coding	760.426	0.347717	0.116208	2.99219	0.00276988	0.0154288	Up Regulated in VP
ENSG00000116991	SIPA1L2	protein_coding	271.115	0.867717	0.21397	4.05532	5.00658e-05	0.000775125	Up Regulated in VP
ENSG00000135749	PCNX2	protein_coding	733.494	-0.407189	0.148749	-2.73742	0.00619239	0.0285272	Down Regulated in VP
ENSG00000054267	ARID4B	protein_coding	2204.08	0.304998	0.102749	2.96838	0.00299375	0.0164217	Up Regulated in VP
ENSG00000152904	GGPS1	protein_coding	213.02	0.546126	0.141618	3.85634	0.000115098	0.00140846	Up Regulated in VP
ENSG00000284770	TBCE	protein_coding	43.5461	-0.75206	0.29698	-2.53236	0.0113298	0.0455294	Down Regulated in VP
ENSG00000162885	B3GALNT2	protein_coding	390.533	0.629377	0.224851	2.79909	0.00512471	0.0247666	Up Regulated in VP
ENSG00000143669	LYST	protein_coding	6236.8	0.612733	0.149991	4.08514	4.40499e-05	0.000705286	Up Regulated in VP
ENSG00000182901	RGS7	protein_coding	5.09183	-2.55414	0.810248	-3.15229	0.00161994	0.0101886	Down Regulated in VP
ENSG00000091483	FH	protein_coding	545.574	0.553203	0.117502	4.70804	2.50113e-06	9.32679e-05	Up Regulated in VP
ENSG00000117009	KMO	protein_coding	255.796	0.55816	0.208687	2.67463	0.00748123	0.0330436	Up Regulated in VP
ENSG00000174371	EXO1	protein_coding	29.4434	1.92853	0.414219	4.65584	3.22664e-06	0.000111105	Up Regulated in VP
ENSG00000162851	TFB2M	protein_coding	238.796	0.38439	0.11911	3.22718	0.00125015	0.00839564	Up Regulated in VP
ENSG00000171163	ZNF692	protein_coding	618.29	-0.61134	0.177477	-3.4446	0.000571897	0.00459876	Down Regulated in VP
ENSG00000172554	SNTG2	protein_coding	8.63645	-1.51506	0.584864	-2.59044	0.00958539	0.0401475	Down Regulated in VP
ENSG00000171863	RPS7	protein_coding	22130.1	-0.371502	0.116954	-3.17649	0.0014907	0.00955592	Down Regulated in VP
ENSG00000134326	CMPK2	protein_coding	1022.05	1.52689	0.357219	4.27439	1.91665e-05	0.000390537	Up Regulated in VP
ENSG00000134321	RSAD2	protein_coding	761.664	2.10689	0.405074	5.20125	1.97956e-07	1.61021e-05	Up Regulated in VP
ENSG00000134313	KIDINS220	protein_coding	2369.14	0.459953	0.097047	4.73948	2.14263e-06	8.40569e-05	Up Regulated in VP
ENSG00000119203	CPSF3	protein_coding	618.428	0.43262	0.138588	3.12163	0.00179853	0.0110512	Up Regulated in VP
ENSG00000151694	ADAM17	protein_coding	1267.13	0.372523	0.13669	2.72532	0.00642388	0.029375	Up Regulated in VP
ENSG00000115750	TAF1B	protein_coding	313.515	0.513865	0.176065	2.91862	0.00351587	0.0185566	Up Regulated in VP
ENSG00000172059	KLF11	protein_coding	2472.6	-0.501929	0.188187	-2.66718	0.00764915	0.0336214	Down Regulated in VP
ENSG00000171848	RRM2	protein_coding	352.189	2.20205	0.336408	6.54578	5.91843e-11	4.43126e-08	Up Regulated in VP
ENSG00000115756	HPCAL1	protein_coding	699.06	-0.779957	0.201613	-3.86859	0.000109468	0.00135584	Down Regulated in VP
ENSG00000115761	NOL10	protein_coding	418.285	0.31601	0.124313	2.54205	0.0110203	0.0446896	Up Regulated in VP
ENSG00000143882	ATP6V1C2	protein_coding	1.76502	2.49679	0.968273	2.5786	0.00992017	0.0412605	Up Regulated in VP
ENSG00000143870	PDIA6	protein_coding	3565.96	0.473785	0.110294	4.29566	1.74172e-05	0.000362998	Up Regulated in VP
ENSG00000151779	NBAS	protein_coding	736.904	0.268501	0.10589	2.53567	0.0112233	0.0452482	Up Regulated in VP
ENSG00000079785	DDX1	protein_coding	1041.07	0.346103	0.109415	3.16323	0.00156029	0.00991771	Up Regulated in VP
ENSG00000197872	FAM49A	protein_coding	2192.15	0.80293	0.177835	4.51502	6.33112e-06	0.000181758	Up Regulated in VP
ENSG00000163029	SMC6	protein_coding	985.634	0.446487	0.126247	3.53662	0.000405287	0.00355267	Up Regulated in VP
ENSG00000055917	PUM2	protein_coding	3298.83	0.340876	0.107914	3.15878	0.00158431	0.0100262	Up Regulated in VP
ENSG00000143869	GDF7	protein_coding	44.6971	-1.45894	0.538078	-2.71139	0.00670027	0.0303349	Down Regulated in VP
ENSG00000118961	LDAH	protein_coding	295.322	0.755739	0.149177	5.06605	4.06148e-07	2.61239e-05	Up Regulated in VP
ENSG00000119778	ATAD2B	protein_coding	657.384	0.495199	0.117399	4.21809	2.46376e-05	0.000463357	Up Regulated in VP
ENSG00000198399	ITSN2	protein_coding	3573.61	0.232226	0.0906358	2.56219	0.0104013	0.0427086	Up Regulated in VP
ENSG00000084676	NCOA1	protein_coding	3308.72	0.333994	0.114746	2.91073	0.00360584	0.0189012	Up Regulated in VP
ENSG00000138092	CENPO	protein_coding	166.815	0.460096	0.143312	3.21045	0.00132528	0.00875776	Up Regulated in VP
ENSG00000138031	ADCY3	protein_coding	542.097	-0.455649	0.157354	-2.89569	0.00378328	0.0196146	Down Regulated in VP
ENSG00000119772	DNMT3A	protein_coding	1040.64	-0.558412	0.175447	-3.1828	0.00145859	0.00941619	Down Regulated in VP
ENSG00000143970	ASXL2	protein_coding	1584.66	0.371797	0.113289	3.28186	0.00103126	0.00723968	Up Regulated in VP
ENSG00000084733	RAB10	protein_coding	2439.67	0.633057	0.182334	3.47197	0.000516652	0.00425189	Up Regulated in VP
ENSG00000115155	OTOF	protein_coding	320.415	2.00723	0.782588	2.56486	0.0103219	0.0424932	Up Regulated in VP
ENSG00000115163	CENPA	protein_coding	13.2195	1.89405	0.530908	3.56757	0.000360311	0.00325575	Up Regulated in VP
ENSG00000084764	MAPRE3	protein_coding	85.7889	-0.51395	0.200414	-2.56445	0.0103341	0.0425259	Down Regulated in VP
ENSG00000084693	AGBL5	protein_coding	291.708	-0.414866	0.142824	-2.90473	0.00367574	0.0192177	Down Regulated in VP
ENSG00000138080	EMILIN1	protein_coding	12.7132	-2.19981	0.452135	-4.86538	1.14236e-06	5.25427e-05	Down Regulated in VP
ENSG00000143994	ABHD1	protein_coding	15.7138	-1.05578	0.290981	-3.62834	0.000285254	0.00274337	Down Regulated in VP
ENSG00000163794	UCN	protein_coding	10.57	-1.76379	0.473421	-3.72563	0.00019483	0.00209836	Down Regulated in VP
ENSG00000163795	ZNF513	protein_coding	434.055	-0.904614	0.165814	-5.45558	4.88129e-08	6.08932e-06	Down Regulated in VP
ENSG00000115241	PPM1G	protein_coding	1885.43	0.184242	0.0657771	2.80101	0.00509437	0.0246612	Up Regulated in VP
ENSG00000163798	SLC4A1AP	protein_coding	662.74	0.244981	0.0776519	3.15486	0.00160577	0.0101251	Up Regulated in VP
ENSG00000152683	SLC30A6	protein_coding	470.075	0.357298	0.116742	3.06056	0.0022092	0.0129856	Up Regulated in VP
ENSG00000091106	NLRC4	protein_coding	525.834	0.928606	0.274165	3.38703	0.000706535	0.00541375	Up Regulated in VP
ENSG00000119820	YIPF4	protein_coding	549.52	0.568645	0.152909	3.71885	0.000200133	0.00214084	Up Regulated in VP
ENSG00000115760	BIRC6	protein_coding	4112	0.430711	0.14014	3.07343	0.00211613	0.0125491	Up Regulated in VP
ENSG00000119812	FAM98A	protein_coding	341.807	0.683054	0.136605	5.00022	5.72646e-07	3.28797e-05	Up Regulated in VP
ENSG00000115808	STRN	protein_coding	1509.37	0.398118	0.121698	3.27136	0.00107032	0.00743564	Up Regulated in VP
ENSG00000055332	EIF2AK2	protein_coding	2344.52	1.13732	0.227801	4.99262	5.95672e-07	3.37548e-05	Up Regulated in VP
ENSG00000115816	CEBPZ	protein_coding	1220.33	0.373224	0.120382	3.10032	0.00193312	0.0116798	Up Regulated in VP
ENSG00000003509	NDUFAF7	protein_coding	350.975	0.271752	0.0992684	2.73755	0.00618986	0.0285272	Up Regulated in VP
ENSG00000152147	GEMIN6	protein_coding	117.852	0.905153	0.167297	5.41044	6.28685e-08	7.03316e-06	Up Regulated in VP
ENSG00000163214	DHX57	protein_coding	552.365	0.331479	0.127325	2.6034	0.00923052	0.0389244	Up Regulated in VP
ENSG00000183023	SLC8A1	protein_coding	862.235	0.656164	0.255938	2.56376	0.0103545	0.0425664	Up Regulated in VP
ENSG00000162881	OXER1	protein_coding	45.8271	-1.13281	0.300494	-3.76983	0.000163361	0.00183583	Down Regulated in VP
ENSG00000115970	THADA	protein_coding	889.993	0.236572	0.0883478	2.67773	0.00741219	0.0328211	Up Regulated in VP
ENSG00000138095	LRPPRC	protein_coding	1850.57	0.336738	0.110544	3.04618	0.00231769	0.0134726	Up Regulated in VP
ENSG00000138032	PPM1B	protein_coding	651.07	0.353574	0.129045	2.73993	0.00614516	0.0284001	Up Regulated in VP
ENSG00000068784	SRBD1	protein_coding	517.566	0.700687	0.151103	4.63715	3.53246e-06	0.000119169	Up Regulated in VP
ENSG00000250565	ATP6V1E2	protein_coding	211.532	-0.554768	0.144833	-3.83041	0.00012793	0.00152881	Down Regulated in VP
ENSG00000119729	RHOQ	protein_coding	1825.16	0.41213	0.143922	2.86357	0.00418901	0.0212142	Up Regulated in VP
ENSG00000119878	CRIPT	protein_coding	168.65	0.747686	0.149103	5.01457	5.31522e-07	3.08247e-05	Up Regulated in VP
ENSG00000180398	MCFD2	protein_coding	1252.84	0.329155	0.113348	2.90394	0.003685	0.0192521	Up Regulated in VP
ENSG00000116062	MSH6	protein_coding	628.247	0.523878	0.117878	4.44422	8.82101e-06	0.000232104	Up Regulated in VP
ENSG00000170802	FOXN2	protein_coding	1569.39	0.418862	0.160069	2.61676	0.00887698	0.0377364	Up Regulated in VP
ENSG00000162869	PPP1R21	protein_coding	968.512	0.279505	0.0889096	3.1437	0.00166824	0.0104089	Up Regulated in VP
ENSG00000143942	CHAC2	protein_coding	28.6326	1.93067	0.379357	5.08931	3.59364e-07	2.44367e-05	Up Regulated in VP
ENSG00000068912	ERLEC1	protein_coding	946.521	0.649279	0.137649	4.71693	2.39436e-06	9.02568e-05	Up Regulated in VP
ENSG00000170634	ACYP2	protein_coding	139.233	-0.398312	0.13859	-2.87404	0.0040526	0.0206258	Down Regulated in VP
ENSG00000162994	CLHC1	protein_coding	87.0265	0.991748	0.341149	2.90708	0.00364823	0.0191052	Up Regulated in VP
ENSG00000143947	RPS27A	protein_coding	31332.2	-0.544543	0.12554	-4.33761	1.44041e-05	0.000323951	Down Regulated in VP
ENSG00000275052	PPP4R3B	protein_coding	2246.24	0.373573	0.106875	3.49543	0.000473297	0.00397625	Up Regulated in VP
ENSG00000138035	PNPT1	protein_coding	676.191	0.397994	0.145242	2.7402	0.00614016	0.0283921	Up Regulated in VP
ENSG00000028116	VRK2	protein_coding	756.418	0.727991	0.159423	4.5664	4.9617e-06	0.000153635	Up Regulated in VP
ENSG00000115392	FANCL	protein_coding	104.801	0.630605	0.197586	3.19154	0.00141515	0.00920775	Up Regulated in VP
ENSG00000162924	REL	protein_coding	1320.38	0.478248	0.184339	2.59439	0.00947587	0.0397945	Up Regulated in VP
ENSG00000162927	PUS10	protein_coding	125.471	0.512184	0.186768	2.74235	0.00610006	0.0282368	Up Regulated in VP
ENSG00000162929	KIAA1841	protein_coding	141.292	0.593618	0.19569	3.03346	0.00241765	0.0138907	Up Regulated in VP
ENSG00000237651	C2orf74	protein_coding	15.705	0.995135	0.321046	3.09967	0.00193737	0.011693	Up Regulated in VP
ENSG00000082898	XPO1	protein_coding	4034.18	0.355239	0.121649	2.9202	0.00349809	0.0184924	Up Regulated in VP
ENSG00000115484	CCT4	protein_coding	1916.4	0.349291	0.0911613	3.83157	0.000127329	0.00152374	Up Regulated in VP
ENSG00000014641	MDH1	protein_coding	1765.64	0.370304	0.0869304	4.25977	2.04634e-05	0.000410214	Up Regulated in VP
ENSG00000143952	VPS54	protein_coding	978.571	0.268437	0.105993	2.5326	0.011322	0.0455189	Up Regulated in VP
ENSG00000119844	AFTPH	protein_coding	2196.85	0.519643	0.110559	4.70016	2.59961e-06	9.45015e-05	Up Regulated in VP
ENSG00000115902	SLC1A4	protein_coding	463.257	1.17888	0.236816	4.97806	6.42257e-07	3.55806e-05	Up Regulated in VP
ENSG00000011523	CEP68	protein_coding	548.84	-0.499658	0.194842	-2.56442	0.0103347	0.0425259	Down Regulated in VP
ENSG00000138071	ACTR2	protein_coding	14350.8	0.552308	0.163554	3.37691	0.00073306	0.0055657	Up Regulated in VP
ENSG00000198369	SPRED2	protein_coding	64.329	0.749595	0.278137	2.69506	0.00703761	0.0314759	Up Regulated in VP
ENSG00000221823	PPP3R1	protein_coding	1544.05	0.431952	0.159438	2.70921	0.00674433	0.0304866	Up Regulated in VP
ENSG00000115956	PLEK	protein_coding	10204.4	0.589982	0.188595	3.1283	0.00175819	0.0108727	Up Regulated in VP
ENSG00000163219	ARHGAP25	protein_coding	3354.11	0.346132	0.113382	3.0528	0.00226718	0.013259	Up Regulated in VP
ENSG00000198380	GFPT1	protein_coding	687.947	0.394199	0.139114	2.83363	0.00460221	0.0228464	Up Regulated in VP
ENSG00000143977	SNRPG	protein_coding	596.22	0.367506	0.126815	2.89798	0.00375575	0.0195101	Up Regulated in VP
ENSG00000124370	MCEE	protein_coding	132.6	0.406621	0.15167	2.68097	0.00734094	0.0325721	Up Regulated in VP
ENSG00000124374	PAIP2B	protein_coding	134.303	-1.08555	0.251644	-4.31383	1.60447e-05	0.000347334	Down Regulated in VP
ENSG00000144040	SFXN5	protein_coding	380.143	-0.5175	0.17857	-2.89803	0.00375512	0.0195101	Down Regulated in VP
ENSG00000135632	SMYD5	protein_coding	480.883	-0.592204	0.142822	-4.14646	3.3765e-05	0.000583734	Down Regulated in VP
ENSG00000144048	DUSP11	protein_coding	423.704	0.505166	0.124955	4.04277	5.28237e-05	0.000804182	Up Regulated in VP
ENSG00000114978	MOB1A	protein_coding	6985.02	0.550644	0.140772	3.91162	9.16808e-05	0.0011944	Up Regulated in VP
ENSG00000065911	MTHFD2	protein_coding	1190.07	0.890101	0.211303	4.21244	2.52627e-05	0.000471027	Up Regulated in VP
ENSG00000188687	SLC4A5	protein_coding	60.5358	-0.857692	0.21273	-4.03183	5.5345e-05	0.000831613	Down Regulated in VP
ENSG00000284308	C2orf81	protein_coding	8.13371	-1.51963	0.493698	-3.07806	0.00208355	0.0123899	Down Regulated in VP
ENSG00000239779	WBP1	protein_coding	278.199	-0.602462	0.174547	-3.45158	0.000557314	0.00451581	Down Regulated in VP
ENSG00000115275	MOGS	protein_coding	1690.02	-0.40747	0.13364	-3.04901	0.00229598	0.013373	Down Regulated in VP
ENSG00000179528	LBX2	protein_coding	5.32656	-1.58943	0.614826	-2.58517	0.00973296	0.0406576	Down Regulated in VP
ENSG00000115307	AUP1	protein_coding	3551.03	-0.290109	0.0934335	-3.10498	0.00190292	0.0115575	Down Regulated in VP
ENSG00000135622	SEMA4F	protein_coding	183.478	-0.537144	0.180354	-2.97828	0.00289871	0.0159974	Down Regulated in VP
ENSG00000115364	MRPL19	protein_coding	432.613	0.645403	0.131882	4.89378	9.89183e-07	4.77783e-05	Up Regulated in VP
ENSG00000186854	TRABD2A	protein_coding	1699.36	-1.12732	0.34699	-3.24886	0.00115869	0.00793179	Down Regulated in VP
ENSG00000042493	CAPG	protein_coding	1859.85	-0.712233	0.238898	-2.98132	0.00287009	0.0158849	Down Regulated in VP
ENSG00000168890	TMEM150A	protein_coding	241.614	-0.506731	0.143291	-3.53637	0.000405669	0.00355267	Down Regulated in VP
ENSG00000168883	USP39	protein_coding	1134.66	0.212517	0.0794538	2.67472	0.0074791	0.0330436	Up Regulated in VP
ENSG00000115525	ST3GAL5	protein_coding	1329.83	0.352029	0.111843	3.14752	0.00164662	0.0103115	Up Regulated in VP
ENSG00000132305	IMMT	protein_coding	1354.39	0.255965	0.081664	3.13437	0.00172226	0.0106848	Up Regulated in VP
ENSG00000132313	MRPL35	protein_coding	336.805	0.441947	0.12278	3.59949	0.000318841	0.00297402	Up Regulated in VP
ENSG00000163586	FABP1	protein_coding	0.101624	-18.9456	4.63214	-4.09003	4.31323e-05	0.000693154	Down Regulated in VP
ENSG00000172005	MAL	protein_coding	645.897	-1.01777	0.353017	-2.88305	0.00393845	0.0202169	Down Regulated in VP
ENSG00000084090	STARD7	protein_coding	2953.67	0.379611	0.0994757	3.81612	0.000135568	0.0015968	Up Regulated in VP
ENSG00000121152	NCAPH	protein_coding	90.7263	1.2434	0.284068	4.37713	1.20255e-05	0.000287588	Up Regulated in VP
ENSG00000196843	ARID5A	protein_coding	1107.78	-0.777513	0.257138	-3.02372	0.00249684	0.0142278	Down Regulated in VP
ENSG00000213337	ANKRD39	protein_coding	76.1899	-0.471627	0.173809	-2.71348	0.00665798	0.0301828	Down Regulated in VP
ENSG00000168758	SEMA4C	protein_coding	495.749	-1.08077	0.222614	-4.85488	1.2046e-06	5.45371e-05	Down Regulated in VP
ENSG00000168754	FAM178B	protein_coding	5.72917	-1.60341	0.608509	-2.63498	0.00841415	0.0362881	Down Regulated in VP
ENSG00000135940	COX5B	protein_coding	829.79	-0.425818	0.14699	-2.89692	0.00376848	0.0195704	Down Regulated in VP
ENSG00000115073	ACTR1B	protein_coding	1574.57	-0.701388	0.142195	-4.9326	8.11442e-07	4.16284e-05	Down Regulated in VP
ENSG00000115085	ZAP70	protein_coding	6016.76	-0.829116	0.246114	-3.36883	0.000754872	0.00567874	Down Regulated in VP
ENSG00000075568	TMEM131	protein_coding	1702.96	0.434527	0.0769924	5.64376	1.66375e-08	2.77472e-06	Up Regulated in VP
ENSG00000071073	MGAT4A	protein_coding	2642.91	-0.432287	0.150698	-2.86856	0.00412339	0.0209257	Down Regulated in VP
ENSG00000115514	TXNDC9	protein_coding	382.899	0.714366	0.141776	5.0387	4.68697e-07	2.90257e-05	Up Regulated in VP
ENSG00000158417	EIF5B	protein_coding	1689.37	0.350523	0.11297	3.10279	0.00191705	0.0116189	Up Regulated in VP
ENSG00000071082	RPL31	protein_coding	20006.1	-0.465326	0.121694	-3.82373	0.00013145	0.00156013	Down Regulated in VP
ENSG00000158435	CNOT11	protein_coding	1001.64	0.249264	0.0992756	2.51083	0.0120447	0.0478256	Up Regulated in VP
ENSG00000135972	MRPS9	protein_coding	354.851	0.376741	0.104943	3.58995	0.000330747	0.00305712	Up Regulated in VP
ENSG00000071051	NCK2	protein_coding	1424.39	-0.961634	0.226491	-4.24579	2.17825e-05	0.000425828	Down Regulated in VP
ENSG00000119147	C2orf40	protein_coding	5.92635	-2.88651	0.680822	-4.23974	2.2378e-05	0.000433074	Down Regulated in VP
ENSG00000153201	RANBP2	protein_coding	2450.17	0.508234	0.12266	4.14343	3.42151e-05	0.000587997	Up Regulated in VP
ENSG00000144061	NPHP1	protein_coding	10.6586	-1.06857	0.36906	-2.89539	0.00378689	0.0196146	Down Regulated in VP
ENSG00000175701	MTLN	protein_coding	59.3873	-1.05369	0.392477	-2.68473	0.00725882	0.032307	Down Regulated in VP
ENSG00000169679	BUB1	protein_coding	95.683	1.78291	0.3731	4.77862	1.76501e-06	7.21341e-05	Up Regulated in VP
ENSG00000153093	ACOXL	protein_coding	3.49629	4.5717	0.989678	4.61938	3.8488e-06	0.000127363	Up Regulated in VP
ENSG00000153094	BCL2L11	protein_coding	1249.7	0.588823	0.125167	4.70431	2.54728e-06	9.4e-05	Up Regulated in VP
ENSG00000144152	FBLN7	protein_coding	37.2784	-1.20547	0.446496	-2.69984	0.0069373	0.0311075	Down Regulated in VP
ENSG00000125611	CHCHD5	protein_coding	147.644	-0.685279	0.189423	-3.61773	0.000297204	0.0028316	Down Regulated in VP
ENSG00000169607	CKAP2L	protein_coding	32.6022	2.51846	0.509896	4.93917	7.84561e-07	4.06458e-05	Up Regulated in VP
ENSG00000125618	PAX8	protein_coding	20.5647	-2.31749	0.891109	-2.60068	0.00930399	0.0392056	Down Regulated in VP
ENSG00000136682	CBWD2	protein_coding	661.782	0.371744	0.121902	3.04952	0.00229207	0.013364	Up Regulated in VP
ENSG00000144134	RABL2A	protein_coding	294.5	-0.588071	0.156483	-3.75805	0.000171245	0.00190835	Down Regulated in VP
ENSG00000115091	ACTR3	protein_coding	7700.9	0.593802	0.135713	4.37541	1.21203e-05	0.00028822	Up Regulated in VP
ENSG00000088205	DDX18	protein_coding	1989.84	0.377479	0.0944663	3.99591	6.44475e-05	0.000923362	Up Regulated in VP
ENSG00000115109	EPB41L5	protein_coding	108.634	-0.604932	0.18275	-3.31016	0.000932417	0.00671712	Down Regulated in VP
ENSG00000115112	TFCP2L1	protein_coding	68.0295	-1.55195	0.589822	-2.63122	0.00850781	0.0365977	Down Regulated in VP
ENSG00000136732	GYPC	protein_coding	1117.67	-0.723006	0.212606	-3.40068	0.000672186	0.00520344	Down Regulated in VP
ENSG00000136717	BIN1	protein_coding	1539.57	-0.717442	0.199656	-3.59339	0.000326399	0.00302176	Down Regulated in VP
ENSG00000163166	IWS1	protein_coding	981.176	0.458235	0.069058	6.6355	3.23396e-11	2.54895e-08	Up Regulated in VP
ENSG00000072163	LIMS2	protein_coding	41.8886	-1.43236	0.393934	-3.63605	0.000276849	0.00269694	Down Regulated in VP
ENSG00000144231	POLR2D	protein_coding	490.246	0.253784	0.0837822	3.02909	0.00245295	0.0140377	Up Regulated in VP
ENSG00000136715	SAP130	protein_coding	655.137	0.319533	0.102767	3.10929	0.00187539	0.0114383	Up Regulated in VP
ENSG00000136731	UGGT1	protein_coding	2030.64	0.389034	0.103192	3.76999	0.000163252	0.00183579	Up Regulated in VP
ENSG00000152082	MZT2B	protein_coding	260.693	-1.65505	0.402105	-4.11598	3.85543e-05	0.00064097	Down Regulated in VP
ENSG00000115762	PLEKHB2	protein_coding	2801.02	0.416008	0.132153	3.14793	0.00164431	0.0103007	Up Regulated in VP
ENSG00000173272	MZT2A	protein_coding	195.743	-0.919971	0.291218	-3.15904	0.00158289	0.0100209	Down Regulated in VP
ENSG00000115839	RAB3GAP1	protein_coding	937.674	0.259435	0.0926658	2.79969	0.0051152	0.0247275	Up Regulated in VP
ENSG00000121988	ZRANB3	protein_coding	64.2558	0.440507	0.166028	2.65321	0.00797308	0.0347894	Up Regulated in VP
ENSG00000144224	UBXN4	protein_coding	3345.36	0.240833	0.0931917	2.58427	0.0097584	0.0407246	Up Regulated in VP
ENSG00000076003	MCM6	protein_coding	597.348	0.714988	0.16519	4.32829	1.50273e-05	0.000331519	Up Regulated in VP
ENSG00000115866	DARS	protein_coding	1213.49	0.305183	0.109613	2.78419	0.00536617	0.0256171	Up Regulated in VP
ENSG00000144228	SPOPL	protein_coding	1421.22	0.577008	0.178542	3.23177	0.00123025	0.00830381	Up Regulated in VP
ENSG00000115919	KYNU	protein_coding	916.739	0.839022	0.246409	3.405	0.000661631	0.00514701	Up Regulated in VP
ENSG00000121989	ACVR2A	protein_coding	253.659	-0.652818	0.179534	-3.63619	0.000276705	0.00269694	Down Regulated in VP
ENSG00000168288	MMADHC	protein_coding	1336.12	0.540078	0.107365	5.03029	4.89736e-07	2.93469e-05	Up Regulated in VP
ENSG00000123609	NMI	protein_coding	1151.11	0.768661	0.182281	4.21691	2.4767e-05	0.000463952	Up Regulated in VP
ENSG00000123610	TNFAIP6	protein_coding	25.9629	1.57516	0.576123	2.73407	0.00625569	0.0287424	Up Regulated in VP
ENSG00000115145	STAM2	protein_coding	545.548	0.503695	0.149841	3.36154	0.000775096	0.00578569	Up Regulated in VP
ENSG00000157827	FMNL2	protein_coding	285.599	1.29021	0.263566	4.89522	9.81947e-07	4.77499e-05	Up Regulated in VP
ENSG00000196504	PRPF40A	protein_coding	2434.46	0.343804	0.093598	3.6732	0.000239532	0.00244322	Up Regulated in VP
ENSG00000162989	KCNJ3	protein_coding	0.376454	19.3166	3.96486	4.87195	1.105e-06	5.13692e-05	Up Regulated in VP
ENSG00000115159	GPD2	protein_coding	643.553	0.848734	0.144927	5.85628	4.73355e-09	1.14483e-06	Up Regulated in VP
ENSG00000123612	ACVR1C	protein_coding	98.5223	-1.01578	0.357721	-2.83959	0.00451715	0.0225467	Down Regulated in VP
ENSG00000196151	WDSUB1	protein_coding	271.224	0.44231	0.168413	2.62634	0.0086309	0.037015	Up Regulated in VP
ENSG00000136536	MARCH7	protein_coding	2379.3	0.486496	0.126201	3.85494	0.00011576	0.00141205	Up Regulated in VP
ENSG00000248672	LY75-CD302	protein_coding	1.57496	2.41758	0.858507	2.81602	0.00486221	0.0238368	Up Regulated in VP
ENSG00000136560	TANK	protein_coding	1677.26	0.419074	0.116267	3.60441	0.000312868	0.00293409	Up Regulated in VP
ENSG00000115233	PSMD14	protein_coding	644.107	0.371834	0.099772	3.72683	0.0001939	0.00209485	Up Regulated in VP
ENSG00000144290	SLC4A10	protein_coding	106.208	1.86817	0.577144	3.23692	0.00120826	0.00818409	Up Regulated in VP
ENSG00000115267	IFIH1	protein_coding	978.288	1.06692	0.187464	5.69133	1.26053e-08	2.32528e-06	Up Regulated in VP
ENSG00000169507	SLC38A11	protein_coding	38.5608	-2.20376	0.51378	-4.2893	1.79237e-05	0.000371767	Down Regulated in VP
ENSG00000198648	STK39	protein_coding	665.978	0.763584	0.149341	5.11301	3.17072e-07	2.27191e-05	Up Regulated in VP
ENSG00000172292	CERS6	protein_coding	1117.32	0.451863	0.159772	2.82818	0.00468136	0.0231729	Up Regulated in VP
ENSG00000152253	SPC25	protein_coding	16.4177	1.7433	0.478853	3.64058	0.000272026	0.00265892	Up Regulated in VP
ENSG00000073737	DHRS9	protein_coding	103.472	1.32756	0.356703	3.72176	0.000197838	0.00212416	Up Regulated in VP
ENSG00000163093	BBS5	protein_coding	16.1901	-1.11961	0.415174	-2.69673	0.00700232	0.0313504	Down Regulated in VP
ENSG00000138399	FASTKD1	protein_coding	510.637	0.378711	0.141133	2.68335	0.00728877	0.0324233	Up Regulated in VP
ENSG00000138385	SSB	protein_coding	1858.93	0.411044	0.114669	3.58462	0.000337564	0.00310194	Up Regulated in VP
ENSG00000144357	UBR3	protein_coding	835.707	0.346644	0.076478	4.5326	5.82626e-06	0.000172696	Up Regulated in VP
ENSG00000115806	GORASP2	protein_coding	1283.82	0.284314	0.0805833	3.52819	0.000418404	0.00362757	Up Regulated in VP
ENSG00000077380	DYNC1I2	protein_coding	1163.72	0.500276	0.127105	3.93593	8.28742e-05	0.00110712	Up Regulated in VP
ENSG00000115840	SLC25A12	protein_coding	398.213	0.518802	0.0965671	5.37245	7.76745e-08	8.16289e-06	Up Regulated in VP
ENSG00000128708	HAT1	protein_coding	782.398	0.511532	0.134648	3.79904	0.000145258	0.00168142	Up Regulated in VP
ENSG00000172878	METAP1D	protein_coding	121.584	-0.695805	0.204759	-3.39817	0.000678377	0.00523733	Down Regulated in VP
ENSG00000144354	CDCA7	protein_coding	289.721	1.29658	0.208242	6.22634	4.77464e-10	2.06981e-07	Up Regulated in VP
ENSG00000144306	SCRN3	protein_coding	237.779	0.448219	0.14334	3.12697	0.00176616	0.0109026	Up Regulated in VP
ENSG00000163328	GPR155	protein_coding	891.165	0.431021	0.150319	2.86736	0.00413908	0.020992	Up Regulated in VP
ENSG00000115935	WIPF1	protein_coding	9815.87	0.344212	0.108897	3.1609	0.00157282	0.00997538	Up Regulated in VP
ENSG00000115966	ATF2	protein_coding	1082.22	0.249996	0.0934367	2.67557	0.00746027	0.0329918	Up Regulated in VP
ENSG00000128654	MTX2	protein_coding	243.192	0.301573	0.0824915	3.6558	0.000256377	0.00254324	Up Regulated in VP
ENSG00000170144	HNRNPA3	protein_coding	7514.12	0.227254	0.0823165	2.76074	0.00576712	0.0271155	Up Regulated in VP
ENSG00000116044	NFE2L2	protein_coding	1501.88	0.456766	0.160527	2.84542	0.00443529	0.0222021	Up Regulated in VP
ENSG00000018510	AGPS	protein_coding	1082.53	0.392069	0.118216	3.31653	0.000911413	0.00658251	Up Regulated in VP
ENSG00000196659	TTC30B	protein_coding	37.1858	0.823828	0.228663	3.60281	0.000314799	0.00294741	Up Regulated in VP
ENSG00000204311	PJVK	protein_coding	35.9067	-0.861638	0.254723	-3.38265	0.00071791	0.00547673	Down Regulated in VP
ENSG00000187231	SESTD1	protein_coding	951.693	0.479945	0.152641	3.14426	0.00166507	0.0103969	Up Regulated in VP
ENSG00000163510	CWC22	protein_coding	673.839	0.346857	0.09541	3.63543	0.000277515	0.00269802	Up Regulated in VP
ENSG00000115232	ITGA4	protein_coding	12310.7	0.523049	0.138114	3.78708	0.000152427	0.00174346	Up Regulated in VP
ENSG00000198130	HIBCH	protein_coding	199.215	0.682734	0.160003	4.267	1.98119e-05	0.000399928	Up Regulated in VP
ENSG00000151689	INPP1	protein_coding	193.641	0.528864	0.166421	3.17787	0.00148361	0.00952456	Up Regulated in VP
ENSG00000151690	MFSD6	protein_coding	1057.73	0.445524	0.151522	2.94032	0.00327873	0.0176727	Up Regulated in VP
ENSG00000189362	NEMP2	protein_coding	182.638	0.47856	0.157422	3.03999	0.00236586	0.0136687	Up Regulated in VP
ENSG00000138386	NAB1	protein_coding	686.56	0.266449	0.100213	2.65882	0.00784155	0.0343191	Up Regulated in VP
ENSG00000115419	GLS	protein_coding	2379.93	0.326198	0.130939	2.49123	0.0127303	0.0498744	Up Regulated in VP
ENSG00000115415	STAT1	protein_coding	8486.03	1.28864	0.256963	5.01489	5.3063e-07	3.08247e-05	Up Regulated in VP
ENSG00000128641	MYO1B	protein_coding	21.2293	-1.46023	0.478829	-3.0496	0.0022915	0.013364	Down Regulated in VP
ENSG00000144381	HSPD1	protein_coding	2491.82	0.392337	0.0769392	5.09931	3.40899e-07	2.38132e-05	Up Regulated in VP
ENSG00000115896	PLCL1	protein_coding	346.123	-0.714769	0.212381	-3.36551	0.000764033	0.00573025	Down Regulated in VP
ENSG00000196141	SPATS2L	protein_coding	329.848	1.18847	0.281361	4.224	2.4e-05	0.000454948	Up Regulated in VP
ENSG00000163535	SGO2	protein_coding	93.5993	0.826617	0.197818	4.17868	2.93203e-05	0.000524138	Up Regulated in VP
ENSG00000196290	NIF3L1	protein_coding	336.286	0.330373	0.103439	3.19388	0.00140375	0.00915422	Up Regulated in VP
ENSG00000119013	NDUFB3	protein_coding	470.487	0.407602	0.130378	3.12631	0.00177014	0.0109154	Up Regulated in VP
ENSG00000003400	CASP10	protein_coding	1187.25	0.427015	0.116444	3.66713	0.000245284	0.00247424	Up Regulated in VP
ENSG00000116030	SUMO1	protein_coding	1830.8	0.366972	0.121561	3.01883	0.00253749	0.0144026	Up Regulated in VP
ENSG00000138439	FAM117B	protein_coding	534.132	0.42481	0.158571	2.67899	0.00738457	0.0327258	Up Regulated in VP
ENSG00000023228	NDUFS1	protein_coding	1245.7	0.399842	0.0856813	4.66663	3.06185e-06	0.000107911	Up Regulated in VP
ENSG00000114942	EEF1B2	protein_coding	12298.1	-0.565434	0.144663	-3.90862	9.28264e-05	0.0012057	Down Regulated in VP
ENSG00000114948	ADAM23	protein_coding	43.7004	-1.96932	0.56835	-3.46497	0.000530286	0.00435171	Down Regulated in VP
ENSG00000138413	IDH1	protein_coding	795.012	0.65691	0.250175	2.6258	0.00864451	0.0370433	Up Regulated in VP
ENSG00000197713	RPE	protein_coding	390.256	0.661774	0.127787	5.17873	2.23404e-07	1.73973e-05	Up Regulated in VP
ENSG00000079246	XRCC5	protein_coding	5993.83	0.390622	0.102421	3.81387	0.000136808	0.00160613	Up Regulated in VP
ENSG00000197756	RPL37A	protein_coding	19100.5	-0.389086	0.125397	-3.10284	0.00191676	0.0116189	Down Regulated in VP
ENSG00000144579	CTDSP1	protein_coding	3569.26	-0.375661	0.0894047	-4.2018	2.64801e-05	0.000488473	Down Regulated in VP
ENSG00000074582	BCS1L	protein_coding	388.092	-0.608853	0.147652	-4.12357	3.73044e-05	0.000627634	Down Regulated in VP
ENSG00000135925	WNT10A	protein_coding	20.3383	-1.92441	0.503156	-3.82468	0.000130941	0.00155621	Down Regulated in VP
ENSG00000280537	AC068946.1	protein_coding	2.09767	3.83115	1.01438	3.77686	0.00015882	0.00179644	Up Regulated in VP
ENSG00000115649	CNPPD1	protein_coding	1892.48	-0.246446	0.076508	-3.22118	0.00127662	0.00850963	Down Regulated in VP
ENSG00000158552	ZFAND2B	protein_coding	947.783	-0.382158	0.119667	-3.19351	0.00140553	0.00915891	Down Regulated in VP
ENSG00000163516	ANKZF1	protein_coding	1847.1	-0.413282	0.165931	-2.49068	0.0127499	0.0499396	Down Regulated in VP
ENSG00000115661	STK16	protein_coding	622.66	-0.346357	0.08832	-3.92162	8.79569e-05	0.00115719	Down Regulated in VP
ENSG00000135924	DNAJB2	protein_coding	862.777	-0.662575	0.157003	-4.22015	2.44144e-05	0.000461261	Down Regulated in VP
ENSG00000124006	OBSL1	protein_coding	13.6131	-1.48982	0.546721	-2.725	0.00643007	0.0293925	Down Regulated in VP
ENSG00000144589	STK11IP	protein_coding	927.323	-0.555693	0.150747	-3.68627	0.000227566	0.00236096	Down Regulated in VP
ENSG00000123983	ACSL3	protein_coding	659.87	0.593758	0.173692	3.41845	0.000629795	0.00494876	Up Regulated in VP
ENSG00000085449	WDFY1	protein_coding	1425.22	0.503016	0.182852	2.75095	0.00594234	0.027647	Up Regulated in VP
ENSG00000036257	CUL3	protein_coding	1423.57	0.393626	0.112901	3.48646	0.000489456	0.00407841	Up Regulated in VP
ENSG00000135905	DOCK10	protein_coding	3833.29	0.379553	0.0933411	4.0663	4.77656e-05	0.000750912	Up Regulated in VP
ENSG00000144468	RHBDD1	protein_coding	576.291	0.39937	0.104958	3.80505	0.000141774	0.00164991	Up Regulated in VP
ENSG00000153827	TRIP12	protein_coding	4223.3	0.434998	0.0858434	5.06735	4.03392e-07	2.61001e-05	Up Regulated in VP
ENSG00000163053	SLC16A14	protein_coding	7.20526	1.51202	0.567574	2.66401	0.00772154	0.0338794	Up Regulated in VP
ENSG00000135899	SP110	protein_coding	3016.99	0.569349	0.120278	4.73361	2.20559e-06	8.53683e-05	Up Regulated in VP
ENSG00000079263	SP140	protein_coding	1137.29	0.524958	0.141171	3.7186	0.000200331	0.00214164	Up Regulated in VP
ENSG00000067066	SP100	protein_coding	5102.54	0.416311	0.12254	3.39735	0.000680429	0.00525084	Up Regulated in VP
ENSG00000173692	PSMD1	protein_coding	1108.32	0.61426	0.109663	5.60134	2.12706e-08	3.30689e-06	Up Regulated in VP
ENSG00000115053	NCL	protein_coding	9312.54	0.261265	0.0782763	3.33773	0.000844651	0.00619816	Up Regulated in VP
ENSG00000187514	PTMA	protein_coding	20377	-0.271764	0.0769317	-3.53253	0.000411596	0.00359369	Down Regulated in VP
ENSG00000144535	DIS3L2	protein_coding	687.694	-0.3176	0.120199	-2.64228	0.00823508	0.035708	Down Regulated in VP
ENSG00000135930	EIF4E2	protein_coding	1751.04	0.410388	0.0957108	4.28779	1.80458e-05	0.000373388	Up Regulated in VP
ENSG00000204120	GIGYF2	protein_coding	1163.08	0.241925	0.0849604	2.84751	0.00440631	0.0220845	Up Regulated in VP
ENSG00000077044	DGKD	protein_coding	3692.06	-0.637134	0.154353	-4.12778	3.66286e-05	0.000619462	Down Regulated in VP
ENSG00000123485	HJURP	protein_coding	46.1075	1.66118	0.39117	4.24669	2.16955e-05	0.000425285	Up Regulated in VP
ENSG00000157985	AGAP1	protein_coding	237.656	-0.860411	0.337672	-2.54806	0.0108323	0.0440402	Down Regulated in VP
ENSG00000144476	ACKR3	protein_coding	50.1416	-0.877743	0.283799	-3.09284	0.00198252	0.0118992	Down Regulated in VP
ENSG00000124831	LRRFIP1	protein_coding	6719.43	0.349337	0.118972	2.93628	0.00332172	0.017849	Up Regulated in VP
ENSG00000144488	ESPNL	protein_coding	3.492	-3.27639	0.982663	-3.33419	0.000855485	0.00625958	Down Regulated in VP
ENSG00000144485	HES6	protein_coding	35.0452	-0.80338	0.297556	-2.69993	0.00693544	0.0311072	Down Regulated in VP
ENSG00000172428	COPS9	protein_coding	332.543	-0.67753	0.143816	-4.71107	2.46415e-06	9.2449e-05	Down Regulated in VP
ENSG00000144504	ANKMY1	protein_coding	542.166	-0.532982	0.151982	-3.50687	0.000453412	0.00384082	Down Regulated in VP
ENSG00000188542	DUSP28	protein_coding	183.743	-0.356036	0.135067	-2.63599	0.00838928	0.0362046	Down Regulated in VP
ENSG00000142327	RNPEPL1	protein_coding	2777.32	-1.01776	0.202219	-5.03297	4.82947e-07	2.91916e-05	Down Regulated in VP
ENSG00000142330	CAPN10	protein_coding	748.348	-0.971795	0.241048	-4.03154	5.54115e-05	0.000831892	Down Regulated in VP
ENSG00000178623	GPR35	protein_coding	162.107	-0.998178	0.267889	-3.72609	0.000194474	0.00209713	Down Regulated in VP
ENSG00000115687	PASK	protein_coding	820.279	-0.658537	0.259298	-2.53969	0.011095	0.0448873	Down Regulated in VP
ENSG00000115677	HDLBP	protein_coding	3850.65	0.355675	0.0771825	4.60823	4.06104e-06	0.000131378	Up Regulated in VP
ENSG00000115694	STK25	protein_coding	1636.19	-0.697771	0.154902	-4.50459	6.65008e-06	0.000187805	Down Regulated in VP
ENSG00000176946	THAP4	protein_coding	472.688	-0.848823	0.167683	-5.06207	4.14732e-07	2.65367e-05	Down Regulated in VP
ENSG00000168397	ATG4B	protein_coding	1199.94	-0.623111	0.156211	-3.9889	6.63814e-05	0.000939635	Down Regulated in VP
ENSG00000168393	DTYMK	protein_coding	175.551	-0.47293	0.184087	-2.56906	0.0101976	0.0421015	Down Regulated in VP
ENSG00000168395	ING5	protein_coding	827.601	-0.554199	0.142723	-3.88304	0.000103157	0.00129338	Down Regulated in VP
ENSG00000180902	D2HGDH	protein_coding	499.914	-0.900813	0.31196	-2.88759	0.00388201	0.0199982	Down Regulated in VP
ENSG00000091181	IL5RA	protein_coding	33.2575	-2.29	0.571391	-4.00777	6.1294e-05	0.000892795	Down Regulated in VP
ENSG00000072756	TRNT1	protein_coding	223.564	0.398652	0.125298	3.18164	0.00146444	0.00943995	Up Regulated in VP
ENSG00000134108	ARL8B	protein_coding	1616.52	0.397005	0.152077	2.61055	0.00903962	0.038231	Up Regulated in VP
ENSG00000134109	EDEM1	protein_coding	3132.09	0.372161	0.0966833	3.84928	0.000118467	0.00143452	Up Regulated in VP
ENSG00000134077	THUMPD3	protein_coding	623.015	0.404493	0.133884	3.02123	0.00251753	0.0143087	Up Regulated in VP
ENSG00000171148	TADA3	protein_coding	1672.25	-0.31224	0.102988	-3.03182	0.00243085	0.0139449	Down Regulated in VP
ENSG00000163703	CRELD1	protein_coding	457.739	-0.519775	0.183697	-2.82953	0.00466166	0.0230952	Down Regulated in VP
ENSG00000125037	EMC3	protein_coding	1208.29	0.284638	0.103976	2.73754	0.00619012	0.0285272	Up Regulated in VP
ENSG00000144713	RPL32	protein_coding	29127.4	-0.48895	0.139177	-3.51315	0.00044283	0.00377145	Down Regulated in VP
ENSG00000132182	NUP210	protein_coding	6554.5	-0.311408	0.122688	-2.53821	0.0111422	0.0450259	Down Regulated in VP
ENSG00000163517	HDAC11	protein_coding	111.924	-1.05046	0.259835	-4.0428	5.28169e-05	0.000804182	Down Regulated in VP
ENSG00000163520	FBLN2	protein_coding	42.1391	-1.4288	0.390318	-3.6606	0.000251624	0.00250901	Down Regulated in VP
ENSG00000154764	WNT7A	protein_coding	41.1968	-2.14236	0.512321	-4.18167	2.89381e-05	0.000519447	Down Regulated in VP
ENSG00000163528	CHCHD4	protein_coding	146.022	0.398203	0.148857	2.67507	0.00747139	0.0330298	Up Regulated in VP
ENSG00000154781	CCDC174	protein_coding	486.273	0.362836	0.130595	2.77833	0.00546383	0.0259641	Up Regulated in VP
ENSG00000206562	METTL6	protein_coding	158.151	0.422977	0.137277	3.08119	0.00206178	0.0122856	Up Regulated in VP
ENSG00000131374	TBC1D5	protein_coding	1903.17	0.252473	0.097195	2.59759	0.00938812	0.0394834	Up Regulated in VP
ENSG00000182568	SATB1	protein_coding	3750.14	-0.398469	0.152039	-2.62084	0.00877139	0.0374423	Down Regulated in VP
ENSG00000183960	KCNH8	protein_coding	69.405	-1.83857	0.420229	-4.37517	1.21338e-05	0.00028822	Down Regulated in VP
ENSG00000144566	RAB5A	protein_coding	1113.35	0.346233	0.109729	3.15535	0.00160305	0.0101153	Up Regulated in VP
ENSG00000129810	SGO1	protein_coding	22.3421	1.11036	0.322935	3.43833	0.00058532	0.00467716	Up Regulated in VP
ENSG00000174748	RPL15	protein_coding	26543.4	-0.493035	0.108254	-4.55442	5.25295e-06	0.000160065	Down Regulated in VP
ENSG00000163512	AZI2	protein_coding	1039.96	0.588999	0.159165	3.70055	0.000215136	0.00226225	Up Regulated in VP
ENSG00000163527	STT3B	protein_coding	3904.74	0.329877	0.111214	2.96614	0.00301562	0.0164955	Up Regulated in VP
ENSG00000091317	CMTM6	protein_coding	5611.02	0.573751	0.16543	3.46823	0.000523898	0.0043054	Up Regulated in VP
ENSG00000168016	TRANK1	protein_coding	2338.89	0.5229	0.176114	2.9691	0.00298672	0.0163892	Up Regulated in VP
ENSG00000076242	MLH1	protein_coding	678.179	0.389358	0.0992113	3.92453	8.68983e-05	0.00114674	Up Regulated in VP
ENSG00000136059	VILL	protein_coding	635.735	-0.668892	0.173222	-3.86148	0.000112704	0.00138723	Down Regulated in VP
ENSG00000187091	PLCD1	protein_coding	434.042	-0.940679	0.184609	-5.09552	3.47793e-07	2.40268e-05	Down Regulated in VP
ENSG00000008226	DLEC1	protein_coding	180.75	-0.906012	0.257506	-3.51841	0.000434146	0.00371758	Down Regulated in VP
ENSG00000172936	MYD88	protein_coding	5928.02	0.519461	0.157758	3.29278	0.000992018	0.00703542	Up Regulated in VP
ENSG00000172939	OXSR1	protein_coding	1807.22	0.448209	0.11085	4.04339	5.26842e-05	0.000803469	Up Regulated in VP
ENSG00000114739	ACVR2B	protein_coding	169.718	-0.66465	0.229304	-2.89856	0.00374883	0.0195034	Down Regulated in VP
ENSG00000168329	CX3CR1	protein_coding	3325.59	1.30035	0.324919	4.00207	6.27903e-05	0.00090732	Up Regulated in VP
ENSG00000168028	RPSA	protein_coding	27135.6	-0.531758	0.137592	-3.86474	0.000111209	0.00137357	Down Regulated in VP
ENSG00000188846	RPL14	protein_coding	17395.3	-0.359177	0.130397	-2.75448	0.00587858	0.0274682	Down Regulated in VP
ENSG00000168038	ULK4	protein_coding	150.389	0.525468	0.177285	2.96398	0.00303691	0.0166015	Up Regulated in VP
ENSG00000114812	VIPR1	protein_coding	712.13	-0.683375	0.242051	-2.82327	0.00475366	0.0234172	Down Regulated in VP
ENSG00000182983	ZNF662	protein_coding	36.7226	-1.07338	0.41703	-2.57386	0.0100572	0.0417005	Down Regulated in VP
ENSG00000179152	TCAIM	protein_coding	373.526	0.400771	0.156771	2.5564	0.010576	0.0432535	Up Regulated in VP
ENSG00000178917	ZNF852	protein_coding	119.091	0.370798	0.134739	2.75196	0.00592394	0.0276058	Up Regulated in VP
ENSG00000186448	ZNF197	protein_coding	371.256	0.334759	0.133663	2.5045	0.0122623	0.0484458	Up Regulated in VP
ENSG00000186446	ZNF501	protein_coding	29.3594	0.850237	0.231738	3.66896	0.000243535	0.00246233	Up Regulated in VP
ENSG00000163808	KIF15	protein_coding	53.6794	1.62976	0.321208	5.07385	3.89842e-07	2.55089e-05	Up Regulated in VP
ENSG00000169964	TMEM42	protein_coding	272.406	-0.433291	0.127863	-3.38871	0.000702232	0.00538792	Down Regulated in VP
ENSG00000011376	LARS2	protein_coding	311.672	0.344548	0.120738	2.85369	0.00432147	0.0217461	Up Regulated in VP
ENSG00000211456	SACM1L	protein_coding	1541.6	0.299045	0.11116	2.69022	0.0071406	0.0318626	Up Regulated in VP
ENSG00000173585	CCR9	protein_coding	41.3001	1.99764	0.550762	3.62705	0.000286676	0.00275095	Up Regulated in VP
ENSG00000172215	CXCR6	protein_coding	79.0458	1.47377	0.330577	4.45817	8.26613e-06	0.000221196	Up Regulated in VP
ENSG00000163823	CCR1	protein_coding	2508.75	1.33458	0.43079	3.09798	0.00194847	0.0117437	Up Regulated in VP
ENSG00000121807	CCR2	protein_coding	1481.51	1.30593	0.358037	3.64749	0.000264815	0.00261348	Up Regulated in VP
ENSG00000160791	CCR5	protein_coding	610.265	1.59875	0.288346	5.54454	2.94734e-08	4.3311e-06	Up Regulated in VP
ENSG00000121797	CCRL2	protein_coding	116.635	1.0659	0.309375	3.44534	0.000570339	0.00459131	Up Regulated in VP
ENSG00000178038	ALS2CL	protein_coding	434.693	-1.03746	0.338073	-3.06874	0.00214967	0.0127089	Down Regulated in VP
ENSG00000181585	TMIE	protein_coding	15.552	-1.5195	0.502413	-3.0244	0.00249128	0.0142023	Down Regulated in VP
ENSG00000160799	CCDC12	protein_coding	611.596	-0.39513	0.157886	-2.50262	0.0123276	0.0486705	Down Regulated in VP
ENSG00000160796	NBEAL2	protein_coding	7718.3	-0.444076	0.174798	-2.54052	0.0110689	0.0448342	Down Regulated in VP
ENSG00000076201	PTPN23	protein_coding	875.821	-0.636922	0.15579	-4.08833	4.34496e-05	0.000696962	Down Regulated in VP
ENSG00000114650	SCAP	protein_coding	1193.91	-0.412685	0.130436	-3.1639	0.00155669	0.00990206	Down Regulated in VP
ENSG00000173473	SMARCC1	protein_coding	2726.19	0.246797	0.0824543	2.99314	0.00276125	0.0153955	Up Regulated in VP
ENSG00000132153	DHX30	protein_coding	1199.75	-0.468003	0.140231	-3.33739	0.000845704	0.00620326	Down Regulated in VP
ENSG00000164045	CDC25A	protein_coding	25.6273	3.12324	0.458671	6.80932	9.80589e-12	1.13356e-08	Up Regulated in VP
ENSG00000164050	PLXNB1	protein_coding	57.1367	-0.79277	0.299392	-2.64794	0.00809844	0.0352301	Down Regulated in VP
ENSG00000232112	TMA7	protein_coding	2491.36	-0.472769	0.116755	-4.04925	5.13827e-05	0.000789872	Down Regulated in VP
ENSG00000114270	COL7A1	protein_coding	22.5431	-1.12092	0.398383	-2.81369	0.00489768	0.0239737	Down Regulated in VP
ENSG00000213672	NCKIPSD	protein_coding	219.959	-0.538446	0.189641	-2.83929	0.00452136	0.0225548	Down Regulated in VP
ENSG00000221883	ARIH2OS	protein_coding	49.4408	-0.734029	0.225579	-3.25398	0.00113801	0.00781816	Down Regulated in VP
ENSG00000178467	P4HTM	protein_coding	757.012	-0.820654	0.166861	-4.91818	8.73522e-07	4.40316e-05	Down Regulated in VP
ENSG00000178149	DALRD3	protein_coding	443.947	-0.478918	0.112809	-4.2454	2.182e-05	0.00042608	Down Regulated in VP
ENSG00000172046	USP19	protein_coding	1592.03	-0.344845	0.112473	-3.06602	0.00216928	0.0128071	Down Regulated in VP
ENSG00000173531	MST1	protein_coding	105.714	-0.775543	0.258278	-3.00275	0.00267556	0.0150095	Down Regulated in VP
ENSG00000164068	RNF123	protein_coding	836.969	-0.282396	0.112539	-2.50932	0.0120964	0.0479762	Down Regulated in VP
ENSG00000214706	IFRD2	protein_coding	359.591	-0.79728	0.193154	-4.12769	3.6643e-05	0.000619462	Down Regulated in VP
ENSG00000186792	HYAL3	protein_coding	34.8897	-1.05789	0.313199	-3.37769	0.000730962	0.00555672	Down Regulated in VP
ENSG00000243477	NAA80	protein_coding	254.665	-0.705526	0.17537	-4.02308	5.74418e-05	0.000855705	Down Regulated in VP
ENSG00000114378	HYAL1	protein_coding	4.95325	-1.6225	0.578168	-2.80627	0.00501185	0.0243569	Down Regulated in VP
ENSG00000068028	RASSF1	protein_coding	2525.68	-0.413335	0.165339	-2.49992	0.0124221	0.048951	Down Regulated in VP
ENSG00000114395	CYB561D2	protein_coding	471.694	-0.432941	0.109464	-3.95511	7.64986e-05	0.00104173	Down Regulated in VP
ENSG00000126062	TMEM115	protein_coding	294.809	-0.418198	0.138336	-3.02306	0.00250235	0.0142452	Down Regulated in VP
ENSG00000007402	CACNA2D2	protein_coding	395.941	-0.989528	0.309103	-3.20129	0.00136814	0.00896579	Down Regulated in VP
ENSG00000088543	C3orf18	protein_coding	212.854	-0.590542	0.192853	-3.06213	0.00219766	0.0129353	Down Regulated in VP
ENSG00000114735	HEMK1	protein_coding	1113.66	-0.572796	0.157177	-3.64427	0.000268156	0.00263447	Down Regulated in VP
ENSG00000145050	MANF	protein_coding	601.641	0.449313	0.14342	3.13286	0.00173114	0.010736	Up Regulated in VP
ENSG00000259956	RBM15B	protein_coding	1544.77	-0.285017	0.0766115	-3.72029	0.000198992	0.0021339	Down Regulated in VP
ENSG00000164081	TEX264	protein_coding	895	-0.347496	0.113341	-3.06593	0.00216997	0.0128071	Down Regulated in VP
ENSG00000041880	PARP3	protein_coding	299.903	-0.478013	0.168212	-2.84173	0.0044869	0.0224216	Down Regulated in VP
ENSG00000090097	PCBP4	protein_coding	330.432	-0.797243	0.229697	-3.47084	0.000518834	0.00426783	Down Regulated in VP
ENSG00000114779	ABHD14B	protein_coding	1025.09	-0.531295	0.143255	-3.70875	0.000208287	0.00220764	Down Regulated in VP
ENSG00000162244	RPL29	protein_coding	14157	-0.780486	0.163795	-4.76502	1.88837e-06	7.52743e-05	Down Regulated in VP
ENSG00000023330	ALAS1	protein_coding	524.662	0.495653	0.179388	2.76302	0.00572689	0.0269483	Up Regulated in VP
ENSG00000247596	TWF2	protein_coding	749.251	-0.805487	0.228181	-3.53004	0.000415503	0.00361159	Down Regulated in VP
ENSG00000164091	WDR82	protein_coding	4744.51	0.227904	0.0886523	2.57076	0.0101477	0.0419376	Up Regulated in VP
ENSG00000168237	GLYCTK	protein_coding	444.846	-0.770755	0.186957	-4.12263	3.74577e-05	0.000628767	Down Regulated in VP
ENSG00000163930	BAP1	protein_coding	1993.49	-0.45712	0.105189	-4.34569	1.3884e-05	0.000314293	Down Regulated in VP
ENSG00000010322	NISCH	protein_coding	2500.27	-0.471549	0.12731	-3.70393	0.000212283	0.00224041	Down Regulated in VP
ENSG00000010327	STAB1	protein_coding	3722.02	-0.774308	0.286937	-2.69853	0.00696467	0.0312061	Down Regulated in VP
ENSG00000168268	NT5DC2	protein_coding	155.206	0.862192	0.312934	2.75519	0.00586579	0.0274373	Up Regulated in VP
ENSG00000168273	SMIM4	protein_coding	63.0319	-0.83878	0.229808	-3.64991	0.000262329	0.00259337	Down Regulated in VP
ENSG00000163939	PBRM1	protein_coding	1885.73	0.375863	0.10261	3.66301	0.000249267	0.00249699	Up Regulated in VP
ENSG00000163938	GNL3	protein_coding	1069.69	0.25533	0.0911279	2.80188	0.00508052	0.0246079	Up Regulated in VP
ENSG00000243696	AC006254.1	protein_coding	104.37	-0.345554	0.129895	-2.66026	0.00780801	0.0341983	Down Regulated in VP
ENSG00000248592	TMEM110-MUSTN1	protein_coding	61.0322	-0.529674	0.205756	-2.57428	0.0100449	0.0416782	Down Regulated in VP
ENSG00000163935	SFMBT1	protein_coding	401.408	-0.369939	0.1309	-2.82612	0.00471157	0.023276	Down Regulated in VP
ENSG00000157388	CACNA1D	protein_coding	8.87669	1.64827	0.650526	2.53375	0.0112848	0.0454114	Up Regulated in VP
ENSG00000113812	ACTR8	protein_coding	488.532	0.410805	0.114176	3.598	0.000320675	0.00298792	Up Regulated in VP
ENSG00000163666	HESX1	protein_coding	19.6364	1.51696	0.523437	2.89808	0.00375454	0.0195101	Up Regulated in VP
ENSG00000168374	ARF4	protein_coding	1689.85	0.493715	0.157994	3.1249	0.00177864	0.0109601	Up Regulated in VP
ENSG00000163681	SLMAP	protein_coding	1027.2	0.396317	0.0958978	4.1327	3.58526e-05	0.000609495	Up Regulated in VP
ENSG00000163686	ABHD6	protein_coding	138.813	0.41448	0.165255	2.50813	0.0121374	0.0480827	Up Regulated in VP
ENSG00000163684	RPP14	protein_coding	226.25	0.296754	0.103108	2.8781	0.00400084	0.0204524	Up Regulated in VP
ENSG00000168297	PXK	protein_coding	852.682	0.418408	0.141498	2.95698	0.00310664	0.0169134	Up Regulated in VP
ENSG00000168291	PDHB	protein_coding	909.414	0.374309	0.108741	3.44219	0.000577023	0.00463007	Up Regulated in VP
ENSG00000114405	C3orf14	protein_coding	70.1746	0.95982	0.293362	3.27179	0.00106868	0.00742862	Up Regulated in VP
ENSG00000183662	FAM19A1	protein_coding	22.557	-1.09242	0.426777	-2.5597	0.0104761	0.0429345	Down Regulated in VP
ENSG00000163378	EOGT	protein_coding	282.076	0.432321	0.147714	2.92673	0.00342543	0.0182367	Up Regulated in VP
ENSG00000144747	TMF1	protein_coding	1677.21	0.386707	0.104375	3.70498	0.000211405	0.0022325	Up Regulated in VP
ENSG00000144744	UBA3	protein_coding	1933.36	0.325526	0.0980043	3.32155	0.000895193	0.00650209	Up Regulated in VP
ENSG00000144746	ARL6IP5	protein_coding	5720.72	0.382383	0.131796	2.90133	0.00371583	0.0193898	Up Regulated in VP
ENSG00000114861	FOXP1	protein_coding	1460.59	-0.640456	0.132801	-4.82266	1.41656e-06	6.05003e-05	Down Regulated in VP
ENSG00000144736	SHQ1	protein_coding	264.93	0.379919	0.103224	3.68051	0.000232765	0.00239819	Up Regulated in VP
ENSG00000083937	CHMP2B	protein_coding	967.468	0.497833	0.150468	3.30856	0.000937767	0.00675286	Up Regulated in VP
ENSG00000169379	ARL13B	protein_coding	133.617	0.375293	0.142309	2.63717	0.00836005	0.0361144	Up Regulated in VP
ENSG00000178700	DHFR2	protein_coding	109.138	0.967923	0.175244	5.52328	3.32724e-08	4.6906e-06	Up Regulated in VP
ENSG00000080819	CPOX	protein_coding	378.724	0.376118	0.138643	2.71286	0.00667059	0.0302163	Up Regulated in VP
ENSG00000036054	TBC1D23	protein_coding	577.237	0.435603	0.0849767	5.12615	2.95728e-07	2.15459e-05	Up Regulated in VP
ENSG00000154174	TOMM70	protein_coding	917.946	0.413141	0.112572	3.67003	0.000242521	0.00245781	Up Regulated in VP
ENSG00000114391	RPL24	protein_coding	12411.2	-0.410204	0.113705	-3.60762	0.000309023	0.00290746	Down Regulated in VP
ENSG00000144815	NXPE3	protein_coding	1873.78	0.331598	0.120225	2.75814	0.00581306	0.0272504	Up Regulated in VP
ENSG00000114455	HHLA2	protein_coding	9.41372	-1.42724	0.474322	-3.00901	0.00262098	0.0147894	Down Regulated in VP
ENSG00000144821	MYH15	protein_coding	4.30197	1.74174	0.644804	2.7012	0.00690904	0.031045	Up Regulated in VP
ENSG00000163507	CIP2A	protein_coding	105.344	1.09973	0.200886	5.47442	4.38954e-08	5.65037e-06	Up Regulated in VP
ENSG00000198919	DZIP3	protein_coding	493.583	0.617156	0.165526	3.72845	0.000192659	0.00208664	Up Regulated in VP
ENSG00000177494	ZBED2	protein_coding	4.29188	2.56375	0.972445	2.63639	0.0083793	0.0361795	Up Regulated in VP
ENSG00000144827	ABHD10	protein_coding	418.3	0.257879	0.0903673	2.85368	0.00432163	0.0217461	Up Regulated in VP
ENSG00000114529	C3orf52	protein_coding	12.6915	1.55344	0.481885	3.22368	0.00126554	0.00846621	Up Regulated in VP
ENSG00000144848	ATG3	protein_coding	2052.14	0.561579	0.153061	3.669	0.000243501	0.00246233	Up Regulated in VP
ENSG00000138459	SLC35A5	protein_coding	567.728	0.683447	0.177876	3.84226	0.000121906	0.00146524	Up Regulated in VP
ENSG00000206530	CFAP44	protein_coding	226.486	-0.542597	0.167851	-3.23261	0.00122663	0.00828263	Down Regulated in VP
ENSG00000121579	NAA50	protein_coding	2196.2	0.57666	0.171104	3.37023	0.000751068	0.00565994	Up Regulated in VP
ENSG00000114573	ATP6V1A	protein_coding	1493.8	0.646881	0.188449	3.43265	0.00059771	0.00475426	Up Regulated in VP
ENSG00000151577	DRD3	protein_coding	2.75002	2.53844	0.890069	2.85196	0.00434507	0.021826	Up Regulated in VP
ENSG00000174255	ZNF80	protein_coding	41.9626	1.42509	0.534083	2.6683	0.00762362	0.0335347	Up Regulated in VP
ENSG00000181847	TIGIT	protein_coding	1457.02	0.886835	0.250111	3.54577	0.000391466	0.00346328	Up Regulated in VP
ENSG00000181722	ZBTB20	protein_coding	125.27	-0.565784	0.205821	-2.74891	0.00597936	0.0277671	Down Regulated in VP
ENSG00000031081	ARHGAP31	protein_coding	745.699	0.523495	0.162959	3.21244	0.00131612	0.00871385	Up Regulated in VP
ENSG00000176142	TMEM39A	protein_coding	517.3	0.410757	0.109374	3.75553	0.000172976	0.00192024	Up Regulated in VP
ENSG00000121577	POPDC2	protein_coding	62.781	-0.546221	0.174206	-3.13549	0.0017157	0.0106517	Down Regulated in VP
ENSG00000082701	GSK3B	protein_coding	1701.65	0.39373	0.0992158	3.96842	7.23516e-05	0.0010007	Up Regulated in VP
ENSG00000144840	RABL3	protein_coding	379.533	0.410614	0.131828	3.11477	0.00184086	0.0112656	Up Regulated in VP
ENSG00000153767	GTF2E1	protein_coding	228.905	0.455275	0.158157	2.87862	0.00399421	0.0204306	Up Regulated in VP
ENSG00000051341	POLQ	protein_coding	52.6706	1.25514	0.338208	3.71114	0.000206327	0.00218954	Up Regulated in VP
ENSG00000145088	EAF2	protein_coding	450.288	0.600634	0.166084	3.61645	0.00029867	0.00283868	Up Regulated in VP
ENSG00000114013	CD86	protein_coding	2462.41	0.687133	0.208346	3.29805	0.0009736	0.00693131	Up Regulated in VP
ENSG00000138496	PARP9	protein_coding	3490.04	1.28024	0.218637	5.85558	4.75361e-09	1.14483e-06	Up Regulated in VP
ENSG00000163840	DTX3L	protein_coding	1999.13	1.07882	0.160684	6.71394	1.89443e-11	1.68152e-08	Up Regulated in VP
ENSG00000173193	PARP14	protein_coding	5074.1	0.827668	0.220813	3.74827	0.000178058	0.00196203	Up Regulated in VP
ENSG00000160145	KALRN	protein_coding	48.5017	-0.839004	0.325547	-2.57721	0.00996017	0.0413873	Down Regulated in VP
ENSG00000114491	UMPS	protein_coding	257.328	0.458196	0.148438	3.08678	0.00202337	0.0120859	Up Regulated in VP
ENSG00000173706	HEG1	protein_coding	1187.05	0.459813	0.18104	2.53984	0.0110903	0.0448826	Up Regulated in VP
ENSG00000221955	SLC12A8	protein_coding	14.4517	2.14014	0.473996	4.51509	6.32895e-06	0.000181758	Up Regulated in VP
ENSG00000114520	SNX4	protein_coding	537.292	0.327185	0.118215	2.76771	0.00564513	0.0266285	Up Regulated in VP
ENSG00000144909	OSBPL11	protein_coding	1402.61	0.45777	0.142938	3.20257	0.00136205	0.00893603	Up Regulated in VP
ENSG00000070476	ZXDC	protein_coding	1003.37	-0.508178	0.0802384	-6.33335	2.39895e-10	1.22347e-07	Down Regulated in VP
ENSG00000159685	CHCHD6	protein_coding	53.2978	-0.872154	0.274194	-3.18079	0.00146872	0.00945633	Down Regulated in VP
ENSG00000114554	PLXNA1	protein_coding	211.667	-1.00523	0.27078	-3.71235	0.000205348	0.00218182	Down Regulated in VP
ENSG00000114626	ABTB1	protein_coding	1994.98	-0.810764	0.200992	-4.03381	5.48799e-05	0.000825341	Down Regulated in VP
ENSG00000058262	SEC61A1	protein_coding	4222.6	0.25992	0.0574384	4.52521	6.03367e-06	0.000177329	Up Regulated in VP
ENSG00000132394	EEFSEC	protein_coding	264.942	-0.435267	0.118126	-3.68476	0.00022892	0.00236843	Down Regulated in VP
ENSG00000163902	RPN1	protein_coding	3339	0.350117	0.100172	3.49515	0.000473803	0.00397857	Up Regulated in VP
ENSG00000181789	COPG1	protein_coding	1596.61	0.274331	0.0730378	3.75601	0.000172644	0.00191777	Up Regulated in VP
ENSG00000184897	H1FX	protein_coding	1325.82	-1.16043	0.258839	-4.48319	7.35355e-06	0.000202398	Down Regulated in VP
ENSG00000163913	IFT122	protein_coding	254.565	-0.352111	0.124515	-2.82787	0.00468593	0.0231848	Down Regulated in VP
ENSG00000004399	PLXND1	protein_coding	2114.61	-0.523387	0.194253	-2.69435	0.00705256	0.0315265	Down Regulated in VP
ENSG00000196455	PIK3R4	protein_coding	488.438	0.631971	0.130885	4.82845	1.37602e-06	5.95019e-05	Up Regulated in VP
ENSG00000017260	ATP2C1	protein_coding	1519.44	0.308208	0.0850863	3.6223	0.000291994	0.0027927	Up Regulated in VP
ENSG00000138246	DNAJC13	protein_coding	2492.87	0.388971	0.130055	2.99082	0.0027823	0.015487	Up Regulated in VP
ENSG00000163781	TOPBP1	protein_coding	1683.17	0.394691	0.105134	3.75416	0.000173924	0.00192705	Up Regulated in VP
ENSG00000144867	SRPRB	protein_coding	471.364	0.499424	0.108965	4.58335	4.57585e-06	0.000144744	Up Regulated in VP
ENSG00000118007	STAG1	protein_coding	1074.48	0.358188	0.0997813	3.58972	0.000331028	0.00305725	Up Regulated in VP
ENSG00000114098	ARMC8	protein_coding	1212.1	0.226696	0.0816464	2.77656	0.00549377	0.0260457	Up Regulated in VP
ENSG00000184432	COPB2	protein_coding	1683.09	0.844199	0.158488	5.32658	1.0008e-07	9.69486e-06	Up Regulated in VP
ENSG00000177311	ZBTB38	protein_coding	2109.32	0.597874	0.212023	2.81985	0.00480459	0.0236247	Up Regulated in VP
ENSG00000114124	GRK7	protein_coding	2.47543	-2.44619	0.981679	-2.49184	0.0127084	0.0497996	Down Regulated in VP
ENSG00000069849	ATP1B3	protein_coding	1888.6	0.554403	0.160761	3.44862	0.000563453	0.00455511	Up Regulated in VP
ENSG00000114127	XRN1	protein_coding	2143.08	0.570311	0.14864	3.83686	0.00012462	0.0014944	Up Regulated in VP
ENSG00000144935	TRPC1	protein_coding	60.0538	-1.17217	0.291872	-4.01604	5.91852e-05	0.00087557	Down Regulated in VP
ENSG00000163714	U2SURP	protein_coding	2882.39	0.253438	0.0960971	2.63731	0.00835655	0.0361083	Up Regulated in VP
ENSG00000181804	SLC9A9	protein_coding	573.79	0.47462	0.139062	3.41301	0.000642485	0.00502552	Up Regulated in VP
ENSG00000188313	PLSCR1	protein_coding	1981.44	0.95702	0.281025	3.40547	0.000660509	0.00514059	Up Regulated in VP
ENSG00000163754	GYG1	protein_coding	1247.58	0.590198	0.188935	3.12381	0.00178525	0.0109852	Up Regulated in VP
ENSG00000070087	PFN2	protein_coding	44.0003	-1.3612	0.358371	-3.7983	0.000145691	0.00168194	Down Regulated in VP
ENSG00000198843	SELENOT	protein_coding	2424.26	0.43021	0.125286	3.43382	0.000595137	0.00474237	Up Regulated in VP
ENSG00000174946	GPR171	protein_coding	436.371	1.11937	0.25402	4.40661	1.05e-05	0.000263869	Up Regulated in VP
ENSG00000181631	P2RY13	protein_coding	913.292	1.07866	0.291919	3.69508	0.000219822	0.00230037	Up Regulated in VP
ENSG00000114850	SSR3	protein_coding	2108.47	0.747727	0.130796	5.71674	1.08584e-08	2.1396e-06	Up Regulated in VP
ENSG00000168827	GFM1	protein_coding	724.687	0.333937	0.0998124	3.34565	0.000820901	0.00605774	Up Regulated in VP
ENSG00000079257	LXN	protein_coding	78.7256	0.627355	0.224831	2.79034	0.00526532	0.025284	Up Regulated in VP
ENSG00000113810	SMC4	protein_coding	1243.17	0.879763	0.163929	5.36672	8.01821e-08	8.37565e-06	Up Regulated in VP
ENSG00000114209	PDCD10	protein_coding	990.629	0.38065	0.125412	3.03519	0.00240383	0.0138296	Up Regulated in VP
ENSG00000173905	GOLIM4	protein_coding	278.068	0.63212	0.192608	3.28189	0.00103113	0.00723968	Up Regulated in VP
ENSG00000085274	MYNN	protein_coding	620.465	0.385847	0.123337	3.12841	0.00175756	0.0108726	Up Regulated in VP
ENSG00000008952	SEC62	protein_coding	1881.7	0.352853	0.129293	2.7291	0.00635074	0.029102	Up Regulated in VP
ENSG00000136603	SKIL	protein_coding	772.828	0.489592	0.180898	2.70645	0.00680064	0.0306612	Up Regulated in VP
ENSG00000075420	FNDC3B	protein_coding	1220.76	0.514447	0.176251	2.91884	0.00351336	0.0185511	Up Regulated in VP
ENSG00000121858	TNFSF10	protein_coding	3605.31	1.48479	0.279869	5.3053	1.12488e-07	1.05693e-05	Up Regulated in VP
ENSG00000114346	ECT2	protein_coding	143.653	0.951378	0.217619	4.37177	1.23244e-05	0.000290359	Up Regulated in VP
ENSG00000114450	GNB4	protein_coding	1229.22	0.817599	0.226083	3.61637	0.000298766	0.00283868	Up Regulated in VP
ENSG00000136518	ACTL6A	protein_coding	568.27	0.287312	0.105047	2.73507	0.00623662	0.0286716	Up Regulated in VP
ENSG00000136522	MRPL47	protein_coding	455.058	0.439184	0.142186	3.0888	0.00200964	0.0120245	Up Regulated in VP
ENSG00000043093	DCUN1D1	protein_coding	792.15	0.349356	0.116396	3.00146	0.00268692	0.0150537	Up Regulated in VP
ENSG00000161202	DVL3	protein_coding	1363.14	-0.192697	0.0694669	-2.77394	0.00553827	0.0262172	Down Regulated in VP
ENSG00000163888	CAMK2N2	protein_coding	1.45927	-3.24983	1.26819	-2.56257	0.0103902	0.042673	Down Regulated in VP
ENSG00000175166	PSMD2	protein_coding	2957.4	0.210106	0.0640954	3.27802	0.00104539	0.00730344	Up Regulated in VP
ENSG00000163882	POLR2H	protein_coding	469.211	-0.385764	0.122426	-3.151	0.00162711	0.0102262	Down Regulated in VP
ENSG00000156931	VPS8	protein_coding	1212.99	0.297004	0.0872818	3.40282	0.000666941	0.0051767	Up Regulated in VP
ENSG00000113790	EHHADH	protein_coding	35.8895	0.864103	0.243661	3.54634	0.000390624	0.0034612	Up Regulated in VP
ENSG00000090520	DNAJB11	protein_coding	869.663	0.375563	0.117609	3.19332	0.00140647	0.00916159	Up Regulated in VP
ENSG00000136514	RTP4	protein_coding	132.869	1.48209	0.208728	7.10058	1.24237e-12	3.59044e-09	Up Regulated in VP
ENSG00000073282	TP63	protein_coding	20.9075	1.37609	0.473309	2.90738	0.00364465	0.0190989	Up Regulated in VP
ENSG00000198836	OPA1	protein_coding	1435.15	0.411736	0.116102	3.54633	0.000390632	0.0034612	Up Regulated in VP
ENSG00000133657	ATP13A3	protein_coding	1682.05	0.468052	0.143883	3.253	0.00114192	0.00783571	Up Regulated in VP
ENSG00000114331	ACAP2	protein_coding	3190.29	0.430908	0.121624	3.54296	0.000395666	0.00349232	Up Regulated in VP
ENSG00000061938	TNK2	protein_coding	2181.26	-1.11313	0.261774	-4.25226	2.1162e-05	0.000418349	Down Regulated in VP
ENSG00000072274	TFRC	protein_coding	2123.53	0.565269	0.166262	3.39988	0.000674153	0.00521401	Up Regulated in VP
ENSG00000163958	ZDHHC19	protein_coding	5.35109	-2.25086	0.82854	-2.71666	0.00659437	0.029965	Down Regulated in VP
ENSG00000174013	FBXO45	protein_coding	292.376	0.539712	0.167154	3.22883	0.00124298	0.00836369	Up Regulated in VP
ENSG00000180370	PAK2	protein_coding	4359.84	0.415856	0.126104	3.29772	0.000974719	0.00693542	Up Regulated in VP
ENSG00000114503	NCBP2	protein_coding	1239.04	0.241741	0.071465	3.38265	0.000717913	0.00547673	Up Regulated in VP
ENSG00000270170	NCBP2-AS2	protein_coding	306.301	-0.771808	0.137729	-5.60382	2.09674e-08	3.30523e-06	Down Regulated in VP
ENSG00000119227	PIGZ	protein_coding	31.2963	-0.927935	0.289499	-3.20531	0.00134918	0.00887508	Down Regulated in VP
ENSG00000182899	RPL35A	protein_coding	12605.7	-0.403411	0.111134	-3.62994	0.000283482	0.00273672	Down Regulated in VP
ENSG00000169020	ATP5ME	protein_coding	647.71	-0.538719	0.16453	-3.27428	0.00105931	0.00738873	Down Regulated in VP
ENSG00000178950	GAK	protein_coding	2036.52	-0.555428	0.162047	-3.42757	0.000609015	0.00482647	Down Regulated in VP
ENSG00000127419	TMEM175	protein_coding	726.732	-0.930729	0.206071	-4.51655	6.28552e-06	0.000181048	Down Regulated in VP
ENSG00000145214	DGKQ	protein_coding	1273.18	-1.26882	0.2563	-4.95052	7.40161e-07	3.93071e-05	Down Regulated in VP
ENSG00000127415	IDUA	protein_coding	308.899	-1.24173	0.256884	-4.83381	1.33946e-06	5.83573e-05	Down Regulated in VP
ENSG00000178222	RNF212	protein_coding	24.5706	-1.14509	0.395076	-2.89841	0.00375057	0.0195066	Down Regulated in VP
ENSG00000159674	SPON2	protein_coding	977.755	-0.873267	0.312664	-2.79299	0.00522232	0.0251291	Down Regulated in VP
ENSG00000159692	CTBP1	protein_coding	1617.82	-0.898986	0.183676	-4.8944	9.86063e-07	4.77607e-05	Down Regulated in VP
ENSG00000090316	MAEA	protein_coding	848.809	-0.657749	0.154322	-4.26218	2.02439e-05	0.000406284	Down Regulated in VP
ENSG00000163950	SLBP	protein_coding	962.059	0.382445	0.0958478	3.99013	6.60381e-05	0.000936305	Up Regulated in VP
ENSG00000168936	TMEM129	protein_coding	601.923	-0.79986	0.183884	-4.3498	1.36259e-05	0.000311706	Down Regulated in VP
ENSG00000168924	LETM1	protein_coding	686.655	-0.261733	0.10192	-2.56803	0.0102278	0.0422161	Down Regulated in VP
ENSG00000185049	NELFA	protein_coding	278.665	-0.750931	0.204934	-3.66425	0.000248061	0.0024908	Down Regulated in VP
ENSG00000130997	POLN	protein_coding	25.365	0.734487	0.279746	2.62555	0.00865102	0.0370575	Up Regulated in VP
ENSG00000123933	MXD4	protein_coding	1573.22	-0.767926	0.186485	-4.1179	3.82341e-05	0.000636868	Down Regulated in VP
ENSG00000159733	ZFYVE28	protein_coding	419.474	-1.26192	0.233383	-5.40709	6.40581e-08	7.1203e-06	Down Regulated in VP
ENSG00000063978	RNF4	protein_coding	1839.49	0.331093	0.0830974	3.9844	6.76521e-05	0.000955283	Up Regulated in VP
ENSG00000168884	TNIP2	protein_coding	822.862	-0.519574	0.142372	-3.6494	0.000262849	0.00259594	Down Regulated in VP
ENSG00000109736	MFSD10	protein_coding	913.937	-1.31063	0.293225	-4.4697	7.83294e-06	0.000212889	Down Regulated in VP
ENSG00000163956	LRPAP1	protein_coding	1698.71	-0.421642	0.150688	-2.79812	0.00514017	0.0248136	Down Regulated in VP
ENSG00000168824	NSG1	protein_coding	227.344	-1.14382	0.403952	-2.83157	0.00463203	0.0229666	Down Regulated in VP
ENSG00000013288	MAN2B2	protein_coding	1661.82	-0.304826	0.115129	-2.64769	0.0081043	0.0352467	Down Regulated in VP
ENSG00000186222	BLOC1S4	protein_coding	204.224	-0.370659	0.126305	-2.93464	0.00333938	0.0179272	Down Regulated in VP
ENSG00000173013	CCDC96	protein_coding	29.1098	-0.841014	0.309623	-2.71625	0.00660251	0.0299941	Down Regulated in VP
ENSG00000173011	TADA2B	protein_coding	1439.21	-0.302712	0.0838572	-3.60985	0.000306377	0.00289198	Down Regulated in VP
ENSG00000196526	AFAP1	protein_coding	256.7	-0.90989	0.28891	-3.14939	0.00163611	0.0102642	Down Regulated in VP
ENSG00000125089	SH3TC1	protein_coding	1235.74	-0.625938	0.233408	-2.68174	0.00732405	0.0325388	Down Regulated in VP
ENSG00000109684	CLNK	protein_coding	16.1778	-1.40734	0.453032	-3.1065	0.00189319	0.0115125	Down Regulated in VP
ENSG00000038219	BOD1L1	protein_coding	2175.64	0.411605	0.104371	3.94369	8.0239e-05	0.00107856	Up Regulated in VP
ENSG00000004468	CD38	protein_coding	1025.22	1.69995	0.248282	6.84686	7.54897e-12	9.34994e-09	Up Regulated in VP
ENSG00000002549	LAP3	protein_coding	3342.01	1.3442	0.267606	5.02305	5.08572e-07	2.99954e-05	Up Regulated in VP
ENSG00000109805	NCAPG	protein_coding	59.2529	2.45687	0.424837	5.78307	7.33486e-09	1.55105e-06	Up Regulated in VP
ENSG00000178177	LCORL	protein_coding	314.179	0.475533	0.160932	2.95487	0.00312799	0.0170082	Up Regulated in VP
ENSG00000038210	PI4K2B	protein_coding	326.292	0.61081	0.192119	3.17933	0.00147617	0.00948732	Up Regulated in VP
ENSG00000091490	SEL1L3	protein_coding	2534.58	0.530588	0.173242	3.06269	0.00219358	0.0129185	Up Regulated in VP
ENSG00000169299	PGM2	protein_coding	674.174	0.532119	0.166078	3.20403	0.00135519	0.00889773	Up Regulated in VP
ENSG00000065882	TBC1D1	protein_coding	1872.4	0.266872	0.0915137	2.9162	0.00354325	0.0186658	Up Regulated in VP
ENSG00000174125	TLR1	protein_coding	1178.74	0.897159	0.201582	4.4506	8.56323e-06	0.000227391	Up Regulated in VP
ENSG00000174130	TLR6	protein_coding	433.436	0.508824	0.19254	2.64269	0.00822491	0.0356818	Up Regulated in VP
ENSG00000121895	TMEM156	protein_coding	261.768	0.609701	0.208879	2.91892	0.00351252	0.0185511	Up Regulated in VP
ENSG00000109790	KLHL5	protein_coding	708.313	0.534512	0.154466	3.46038	0.00053942	0.00440789	Up Regulated in VP
ENSG00000035928	RFC1	protein_coding	1184.77	0.49681	0.121665	4.08342	4.43777e-05	0.000708599	Up Regulated in VP
ENSG00000163682	RPL9	protein_coding	29095.1	-0.47181	0.164186	-2.87363	0.00405781	0.0206402	Down Regulated in VP
ENSG00000109814	UGDH	protein_coding	196.924	0.543618	0.18884	2.87873	0.0039928	0.0204294	Up Regulated in VP
ENSG00000078140	UBE2K	protein_coding	1505.69	0.381446	0.119224	3.19939	0.00137719	0.0090217	Up Regulated in VP
ENSG00000174343	CHRNA9	protein_coding	1.85445	2.54563	1.0206	2.49425	0.0126225	0.0495528	Up Regulated in VP
ENSG00000154277	UCHL1	protein_coding	5.63727	4.7604	1.02285	4.65407	3.25453e-06	0.00011175	Up Regulated in VP
ENSG00000109133	TMEM33	protein_coding	801.706	0.508929	0.152419	3.33901	0.000840772	0.00617849	Up Regulated in VP
ENSG00000014824	SLC30A9	protein_coding	902.419	0.30772	0.105284	2.92276	0.00346949	0.0184083	Up Regulated in VP
ENSG00000151806	GUF1	protein_coding	506.399	0.429697	0.09081	4.73182	2.22517e-06	8.59343e-05	Up Regulated in VP
ENSG00000145246	ATP10D	protein_coding	684.614	0.446619	0.131916	3.38562	0.000710169	0.005432	Up Regulated in VP
ENSG00000075539	FRYL	protein_coding	2061.74	0.305413	0.122179	2.49971	0.0124295	0.048951	Up Regulated in VP
ENSG00000145216	FIP1L1	protein_coding	593.543	0.269624	0.0807965	3.33708	0.000846645	0.00620753	Up Regulated in VP
ENSG00000128039	SRD5A3	protein_coding	161.631	0.571874	0.222776	2.56704	0.0102572	0.0423071	Up Regulated in VP
ENSG00000157426	AASDH	protein_coding	360.42	0.310251	0.111574	2.78067	0.00542466	0.0258275	Up Regulated in VP
ENSG00000128059	PPAT	protein_coding	177.896	0.459362	0.101926	4.50681	6.58082e-06	0.000187439	Up Regulated in VP
ENSG00000128050	PAICS	protein_coding	536.418	0.664681	0.1464	4.54016	5.62112e-06	0.000167798	Up Regulated in VP
ENSG00000174780	SRP72	protein_coding	2642.95	0.429225	0.098368	4.36347	1.28017e-05	0.000299073	Up Regulated in VP
ENSG00000128040	SPINK2	protein_coding	17.765	-1.77894	0.51617	-3.44642	0.000568066	0.00457741	Down Regulated in VP
ENSG00000047315	POLR2B	protein_coding	2314.31	0.418185	0.0870268	4.80524	1.54564e-06	6.45818e-05	Up Regulated in VP
ENSG00000033178	UBA6	protein_coding	938.18	0.346877	0.117624	2.94904	0.00318759	0.017268	Up Regulated in VP
ENSG00000132464	ENAM	protein_coding	2.81119	2.329	0.901536	2.58337	0.00978404	0.0408218	Up Regulated in VP
ENSG00000132465	JCHAIN	protein_coding	6687.41	2.26061	0.51759	4.36757	1.25637e-05	0.000294613	Up Regulated in VP
ENSG00000132467	UTP3	protein_coding	639.177	0.574842	0.103048	5.5784	2.42744e-08	3.66016e-06	Up Regulated in VP
ENSG00000156136	DCK	protein_coding	1502.71	0.287163	0.114066	2.51752	0.0118183	0.0471102	Up Regulated in VP
ENSG00000132466	ANKRD17	protein_coding	2139.68	0.387812	0.0975131	3.97702	6.97839e-05	0.000976637	Up Regulated in VP
ENSG00000174796	THAP6	protein_coding	207.633	0.266496	0.106776	2.49584	0.0125659	0.0493863	Up Regulated in VP
ENSG00000138757	G3BP2	protein_coding	3394.27	0.414231	0.135543	3.05609	0.00224243	0.0131319	Up Regulated in VP
ENSG00000138768	USO1	protein_coding	1458.12	0.574045	0.124474	4.61175	3.99286e-06	0.000129656	Up Regulated in VP
ENSG00000169245	CXCL10	protein_coding	176.341	1.88137	0.53269	3.53183	0.000412701	0.00360153	Up Regulated in VP
ENSG00000138750	NUP54	protein_coding	596.803	0.314709	0.105153	2.99286	0.00276381	0.0154048	Up Regulated in VP
ENSG00000138760	SCARB2	protein_coding	2140.82	0.687772	0.199118	3.45409	0.000552159	0.00448662	Up Regulated in VP
ENSG00000156234	CXCL13	protein_coding	3.26912	3.34302	1.03976	3.21518	0.00130364	0.00865714	Up Regulated in VP
ENSG00000169288	MRPL1	protein_coding	323.857	0.365833	0.1299	2.81628	0.0048584	0.0238249	Up Regulated in VP
ENSG00000138772	ANXA3	protein_coding	19.8266	2.48633	0.836259	2.97316	0.00294754	0.0162223	Up Regulated in VP
ENSG00000152795	HNRNPDL	protein_coding	10023.5	-0.263462	0.0611673	-4.30723	1.6531e-05	0.000353014	Down Regulated in VP
ENSG00000138674	SEC31A	protein_coding	2757.88	0.414388	0.0994445	4.16703	3.08595e-05	0.000545467	Up Regulated in VP
ENSG00000138663	COPS4	protein_coding	561.122	0.388743	0.134995	2.87969	0.0039807	0.0203915	Up Regulated in VP
ENSG00000163319	MRPS18C	protein_coding	288.529	0.654879	0.184132	3.55656	0.000375737	0.00336012	Up Regulated in VP
ENSG00000163625	WDFY3	protein_coding	872.108	0.728757	0.240889	3.02528	0.00248401	0.0141826	Up Regulated in VP
ENSG00000163629	PTPN13	protein_coding	114.641	1.02899	0.245968	4.18343	2.87138e-05	0.000518478	Up Regulated in VP
ENSG00000172493	AFF1	protein_coding	2175.59	0.239962	0.0897383	2.67402	0.00749471	0.0330767	Up Regulated in VP
ENSG00000145332	KLHL8	protein_coding	517.715	0.606426	0.184645	3.28427	0.00102246	0.00719689	Up Regulated in VP
ENSG00000138642	HERC6	protein_coding	646.975	0.826525	0.231226	3.57454	0.00035085	0.00318854	Up Regulated in VP
ENSG00000138646	HERC5	protein_coding	705.778	1.27647	0.281155	4.54012	5.62231e-06	0.000167798	Up Regulated in VP
ENSG00000138641	HERC3	protein_coding	1390.99	0.399106	0.113109	3.5285	0.000417927	0.00362524	Up Regulated in VP
ENSG00000180346	TIGD2	protein_coding	101.334	0.668802	0.184041	3.63399	0.000279068	0.00270791	Up Regulated in VP
ENSG00000163104	SMARCAD1	protein_coding	812.036	0.312132	0.116502	2.67919	0.00737999	0.0327203	Up Regulated in VP
ENSG00000163110	PDLIM5	protein_coding	822.727	0.608181	0.132315	4.59647	4.29718e-06	0.000137225	Up Regulated in VP
ENSG00000151247	EIF4E	protein_coding	514.903	0.425718	0.126565	3.36362	0.000769273	0.00575709	Up Regulated in VP
ENSG00000164024	METAP1	protein_coding	943.771	0.272047	0.0827574	3.28728	0.00101159	0.00715081	Up Regulated in VP
ENSG00000197894	ADH5	protein_coding	1318.91	0.31497	0.0940686	3.34831	0.000813072	0.00601479	Up Regulated in VP
ENSG00000145331	TRMT10A	protein_coding	88.3276	0.574689	0.173928	3.30417	0.000952574	0.00682196	Up Regulated in VP
ENSG00000070190	DAPP1	protein_coding	1746.94	0.477524	0.171306	2.78754	0.00531096	0.0254328	Up Regulated in VP
ENSG00000109270	LAMTOR3	protein_coding	627.449	0.620289	0.15714	3.94736	7.90177e-05	0.00106379	Up Regulated in VP
ENSG00000164032	H2AFZ	protein_coding	2257.11	0.257264	0.0875817	2.93742	0.00330953	0.0178055	Up Regulated in VP
ENSG00000145354	CISD2	protein_coding	398.802	0.321304	0.111534	2.88077	0.00396709	0.0203459	Up Regulated in VP
ENSG00000138778	CENPE	protein_coding	85.256	1.64131	0.289715	5.66528	1.46788e-08	2.62403e-06	Up Regulated in VP
ENSG00000168769	TET2	protein_coding	2490.94	0.4588	0.159839	2.87039	0.00409971	0.0208289	Up Regulated in VP
ENSG00000138785	INTS12	protein_coding	466.321	0.361146	0.119899	3.01209	0.00259457	0.0146547	Up Regulated in VP
ENSG00000145348	TBCK	protein_coding	489.125	0.408586	0.101712	4.01709	5.89214e-05	0.0008725	Up Regulated in VP
ENSG00000138801	PAPSS1	protein_coding	915.501	0.476521	0.174371	2.7328	0.00627986	0.0288381	Up Regulated in VP
ENSG00000109475	RPL34	protein_coding	16017	-0.507213	0.141792	-3.57717	0.00034734	0.0031716	Down Regulated in VP
ENSG00000198856	OSTC	protein_coding	1149.89	0.383034	0.12261	3.124	0.00178412	0.0109821	Up Regulated in VP
ENSG00000174720	LARP7	protein_coding	1252.56	0.432638	0.108263	3.99617	6.43746e-05	0.000923362	Up Regulated in VP
ENSG00000145349	CAMK2D	protein_coding	957.333	0.338041	0.133419	2.53367	0.0112874	0.0454114	Up Regulated in VP
ENSG00000150961	SEC24D	protein_coding	859.853	0.888539	0.132048	6.72892	1.70922e-11	1.67274e-08	Up Regulated in VP
ENSG00000145390	USP53	protein_coding	386.068	-1.10001	0.256251	-4.29272	1.765e-05	0.000366967	Down Regulated in VP
ENSG00000164109	MAD2L1	protein_coding	161.622	0.616385	0.191239	3.22311	0.00126807	0.00847336	Up Regulated in VP
ENSG00000164112	TMEM155	protein_coding	37.491	3.16906	0.471082	6.72719	1.72968e-11	1.67274e-08	Up Regulated in VP
ENSG00000145386	CCNA2	protein_coding	101.753	1.77315	0.313792	5.65071	1.59786e-08	2.74326e-06	Up Regulated in VP
ENSG00000138686	BBS7	protein_coding	186.998	0.415241	0.163286	2.54303	0.0109897	0.0445964	Up Regulated in VP
ENSG00000138684	IL21	protein_coding	5.71807	3.53293	0.682072	5.1797	2.22241e-07	1.73973e-05	Up Regulated in VP
ENSG00000142731	PLK4	protein_coding	100.387	0.965493	0.223332	4.32312	1.53835e-05	0.00033638	Up Regulated in VP
ENSG00000151466	SCLT1	protein_coding	626.144	0.571378	0.16401	3.4838	0.000494347	0.00410339	Up Regulated in VP
ENSG00000151470	C4orf33	protein_coding	459.693	0.525193	0.139534	3.7639	0.000167284	0.00187384	Up Regulated in VP
ENSG00000151012	SLC7A11	protein_coding	16.5195	1.4329	0.399884	3.58328	0.000339305	0.00311134	Up Regulated in VP
ENSG00000109390	NDUFC1	protein_coding	236.4	-0.297067	0.111629	-2.6612	0.00778628	0.0341376	Down Regulated in VP
ENSG00000164134	NAA15	protein_coding	940.993	0.429744	0.150569	2.85414	0.00431542	0.0217275	Up Regulated in VP
ENSG00000179387	ELMOD2	protein_coding	371.967	0.424839	0.130572	3.25367	0.00113923	0.00782223	Up Regulated in VP
ENSG00000170185	USP38	protein_coding	1096.22	0.408851	0.132835	3.07788	0.00208478	0.0123929	Up Regulated in VP
[truncated: 3,357 more rows]

## Sheet: HC_vs_VP
ID	GeneName	BioType	baseMean	log2FoldChange	lfcSE	stat	pvalue	padj	Significance
[truncated: 1,868 more rows]
