# Supplementary material for: Genome-scale metabolic models for natural and long-term drug-induced viral control in HIV infection
Source: Life Sci Alliance. 2022 May 10;5(9):e202201405. doi: 10.26508/lsa.202201405 (PMC9095731; doi:10.26508/lsa.202201405)
Supplement: Supplementary file 3 [file LSA-2022-01405_Supplementary_Data_2.xlsx]

## Sheet: Suppl.File2
Gene	LFC_ART-VP	AdjPval_ART-VP	Regulation_ART-VP	LFC_HC-ART	AdjPval_HC-ART	Regulation_HC-ART	LFC_EC-ART	AdjPval_EC-ART	Regulation_EC-ART
AAR2	NA	NA	NA	0.370928	0.0267983	Up Regulated in ART	0.652382	0.00852471	Up Regulated in ART
ABCA5	NA	NA	NA	NA	NA	NA	-0.909689	0.035384	Down Regulated in ART
ABCB10	NA	NA	NA	-0.304414	0.0399886	Down Regulated in ART	NA	NA	NA
ABCB7	NA	NA	NA	-0.303134	0.00931574	Down Regulated in ART	NA	NA	NA
ABCF1	NA	NA	NA	0.241451	0.00922985	Up Regulated in ART	NA	NA	NA
ABCF3	NA	NA	NA	0.349457	0.0120914	Up Regulated in ART	NA	NA	NA
ABCG1	NA	NA	NA	NA	NA	NA	0.769287	0.0180346	Up Regulated in ART
ABRAXAS1	NA	NA	NA	-0.610546	0.000527435	Down Regulated in ART	NA	NA	NA
AC0097793	NA	NA	NA	0.928338	0.00295851	Up Regulated in ART	NA	NA	NA
AC0923381	NA	NA	NA	NA	NA	NA	0.783584	0.0304377	Up Regulated in ART
AC0925871	17.4025	0.00670328	Up Regulated in VP	NA	NA	NA	NA	NA	NA
AC0933231	NA	NA	NA	NA	NA	NA	0.685786	0.0232933	Up Regulated in ART
AC0988503	NA	NA	NA	NA	NA	NA	-6.89107	5.95698e-05	Down Regulated in ART
AC1044521	NA	NA	NA	NA	NA	NA	-1.60555	0.0363216	Down Regulated in ART
AC1394917	NA	NA	NA	NA	NA	NA	-2.14748	0.0134242	Down Regulated in ART
ACKR1	23.1932	0.0215328	Up Regulated in VP	NA	NA	NA	NA	NA	NA
ACP1	NA	NA	NA	NA	NA	NA	0.302704	0.0228601	Up Regulated in ART
ACRBP	NA	NA	NA	0.740152	0.0478516	Up Regulated in ART	NA	NA	NA
ACSF2	NA	NA	NA	0.258117	0.0466647	Up Regulated in ART	NA	NA	NA
ACTR3B	NA	NA	NA	0.359164	0.0390284	Up Regulated in ART	NA	NA	NA
ADCY4	NA	NA	NA	0.639721	0.00347185	Up Regulated in ART	NA	NA	NA
ADCY7	NA	NA	NA	NA	NA	NA	-0.792916	1.10129e-06	Down Regulated in ART
ADGRE3	NA	NA	NA	-1.0669	0.0088664	Down Regulated in ART	NA	NA	NA
ADGRF3	NA	NA	NA	0.89847	0.0407523	Up Regulated in ART	NA	NA	NA
ADGRG7	NA	NA	NA	23.6692	3.17867e-05	Up Regulated in ART	NA	NA	NA
ADPGK	NA	NA	NA	0.257651	0.0313159	Up Regulated in ART	NA	NA	NA
ADPRHL2	NA	NA	NA	NA	NA	NA	0.679137	0.00154121	Up Regulated in ART
ADPRM	NA	NA	NA	NA	NA	NA	1.42545	4.07e-07	Up Regulated in ART
ADSL	NA	NA	NA	NA	NA	NA	-0.823897	0.0371928	Down Regulated in ART
ADSS	NA	NA	NA	-0.369549	0.0229055	Down Regulated in ART	NA	NA	NA
AGL	NA	NA	NA	NA	NA	NA	-0.653731	0.0272882	Down Regulated in ART
AGO3	0.636077	0.0457344	Up Regulated in VP	NA	NA	NA	NA	NA	NA
AGPAT4	NA	NA	NA	0.564321	0.0328901	Up Regulated in ART	NA	NA	NA
AHNAK	NA	NA	NA	NA	NA	NA	-0.643212	0.0419573	Down Regulated in ART
AHSP	NA	NA	NA	5.21168	0.000199036	Up Regulated in ART	NA	NA	NA
AIDA	NA	NA	NA	-0.417464	0.0410417	Down Regulated in ART	NA	NA	NA
AIFM3	-1.40871	0.0479283	Down Regulated in VP	NA	NA	NA	NA	NA	NA
AKAP7	NA	NA	NA	-0.628805	0.000728301	Down Regulated in ART	NA	NA	NA
AKAP8	NA	NA	NA	0.353813	0.0353671	Up Regulated in ART	NA	NA	NA
AL1218453	NA	NA	NA	NA	NA	NA	-3.15397	0.00024691	Down Regulated in ART
AL1364541	NA	NA	NA	NA	NA	NA	1.34073	0.0173979	Up Regulated in ART
AL1579352	NA	NA	NA	NA	NA	NA	-1.29511	0.00367717	Down Regulated in ART
AL3584726	NA	NA	NA	-1.7537	0.031906	Down Regulated in ART	NA	NA	NA
ALAS2	NA	NA	NA	5.8931	0.000840364	Up Regulated in ART	NA	NA	NA
AMFR	NA	NA	NA	NA	NA	NA	0.391124	0.0191966	Up Regulated in ART
ANAPC5	NA	NA	NA	0.183131	0.0151663	Up Regulated in ART	NA	NA	NA
ANKH	NA	NA	NA	-0.374553	0.0189675	Down Regulated in ART	NA	NA	NA
ANKRD40CL	NA	NA	NA	20.2067	0.000406787	Up Regulated in ART	NA	NA	NA
ANKRD42	NA	NA	NA	NA	NA	NA	-0.698466	0.000368966	Down Regulated in ART
ANKRD49	NA	NA	NA	NA	NA	NA	0.583624	0.0312021	Up Regulated in ART
ANP32B	NA	NA	NA	NA	NA	NA	0.470592	0.00525713	Up Regulated in ART
AP1AR	NA	NA	NA	-0.664214	0.00191169	Down Regulated in ART	-0.756325	0.0154131	Down Regulated in ART
APIP	NA	NA	NA	NA	NA	NA	-0.640404	0.0380269	Down Regulated in ART
APOM	NA	NA	NA	0.592949	0.0184882	Up Regulated in ART	1.10747	0.0161667	Up Regulated in ART
ARF6	NA	NA	NA	NA	NA	NA	0.368694	0.0394704	Up Regulated in ART
ARFGAP2	NA	NA	NA	0.210897	0.0202811	Up Regulated in ART	NA	NA	NA
ARHGAP15	NA	NA	NA	NA	NA	NA	0.615459	0.00772651	Up Regulated in ART
ARHGDIB	NA	NA	NA	NA	NA	NA	0.484023	9.47776e-05	Up Regulated in ART
ARHGEF17	NA	NA	NA	NA	NA	NA	-2.15699	0.0302808	Down Regulated in ART
ARID1A	NA	NA	NA	NA	NA	NA	-0.53499	0.000567977	Down Regulated in ART
ARL5A	NA	NA	NA	NA	NA	NA	-0.729399	0.030361	Down Regulated in ART
ARL6IP6	NA	NA	NA	-0.403407	0.00149474	Down Regulated in ART	-0.681213	0.00282969	Down Regulated in ART
ARMCX6	NA	NA	NA	NA	NA	NA	0.585327	0.00330678	Up Regulated in ART
ARNT2	-16.4544	0.0244831	Down Regulated in VP	NA	NA	NA	NA	NA	NA
ARPC1B	NA	NA	NA	NA	NA	NA	-1.25313	3.65671e-09	Down Regulated in ART
ARPC5L	NA	NA	NA	0.617293	0.000479959	Up Regulated in ART	NA	NA	NA
ARX	-14.9023	0.0386681	Down Regulated in VP	NA	NA	NA	NA	NA	NA
ASAH2	NA	NA	NA	-1.41184	0.0393951	Down Regulated in ART	NA	NA	NA
ASIP	NA	NA	NA	-2.0806	0.0276686	Down Regulated in ART	NA	NA	NA
ASTE1	NA	NA	NA	NA	NA	NA	0.722884	0.0267777	Up Regulated in ART
ATAD3C	NA	NA	NA	-1.03374	0.0160149	Down Regulated in ART	NA	NA	NA
ATAT1	NA	NA	NA	0.493935	0.0056831	Up Regulated in ART	NA	NA	NA
ATG2B	NA	NA	NA	NA	NA	NA	-0.70509	0.00532159	Down Regulated in ART
ATOX1	NA	NA	NA	0.347237	0.0170545	Up Regulated in ART	0.579322	0.00402036	Up Regulated in ART
ATP5F1E	NA	NA	NA	NA	NA	NA	0.941356	7.87209e-06	Up Regulated in ART
ATP5MC1	NA	NA	NA	NA	NA	NA	0.758452	0.00018383	Up Regulated in ART
ATP5MC2	NA	NA	NA	NA	NA	NA	0.750164	3.31419e-05	Up Regulated in ART
ATP5MC3	NA	NA	NA	NA	NA	NA	0.702912	0.000216714	Up Regulated in ART
ATP5MD	NA	NA	NA	NA	NA	NA	0.931741	2.94723e-06	Up Regulated in ART
ATP5MPL	NA	NA	NA	NA	NA	NA	0.999417	4.0697e-06	Up Regulated in ART
ATP5PD	NA	NA	NA	NA	NA	NA	0.68003	7.09187e-05	Up Regulated in ART
ATP5PF	NA	NA	NA	NA	NA	NA	0.506345	0.0112235	Up Regulated in ART
ATP6V1G1	NA	NA	NA	NA	NA	NA	0.437803	0.0149262	Up Regulated in ART
ATRAID	NA	NA	NA	NA	NA	NA	0.550316	0.000735043	Up Regulated in ART
ATXN2	NA	NA	NA	NA	NA	NA	-0.38219	0.0460604	Down Regulated in ART
ATXN7L3B	NA	NA	NA	NA	NA	NA	0.625248	0.000612758	Up Regulated in ART
AUH	NA	NA	NA	-0.242822	0.0474868	Down Regulated in ART	NA	NA	NA
B2M	NA	NA	NA	NA	NA	NA	0.40997	0.00644386	Up Regulated in ART
B4GALT2	-1.10715	0.0439676	Down Regulated in VP	NA	NA	NA	NA	NA	NA
B4GALT3	NA	NA	NA	0.318119	0.0307215	Up Regulated in ART	NA	NA	NA
BAG1	NA	NA	NA	NA	NA	NA	0.392345	0.0371262	Up Regulated in ART
BAG5	NA	NA	NA	NA	NA	NA	0.672099	0.0245116	Up Regulated in ART
BCORL1	NA	NA	NA	NA	NA	NA	-0.764271	0.00191061	Down Regulated in ART
BET1L	NA	NA	NA	NA	NA	NA	0.367144	0.0126253	Up Regulated in ART
BICD2	NA	NA	NA	-0.331464	0.0399191	Down Regulated in ART	-0.686249	0.00156739	Down Regulated in ART
BLOC1S1	NA	NA	NA	0.721078	0.00189759	Up Regulated in ART	NA	NA	NA
BLOC1S3	NA	NA	NA	NA	NA	NA	0.600437	0.00502636	Up Regulated in ART
BMI1	NA	NA	NA	NA	NA	NA	-0.73702	0.0428044	Down Regulated in ART
BMT2	NA	NA	NA	-0.780548	3.17867e-05	Down Regulated in ART	-0.673591	0.014745	Down Regulated in ART
BOD1	NA	NA	NA	NA	NA	NA	0.531625	0.0448501	Up Regulated in ART
BRD3	NA	NA	NA	NA	NA	NA	-0.428905	0.0314238	Down Regulated in ART
BRD9	NA	NA	NA	0.262473	0.0155646	Up Regulated in ART	NA	NA	NA
BRF2	NA	NA	NA	NA	NA	NA	1.06903	0.00448302	Up Regulated in ART
BRI3BP	NA	NA	NA	-0.402912	0.0362222	Down Regulated in ART	NA	NA	NA
BRIX1	NA	NA	NA	NA	NA	NA	0.640425	0.0130424	Up Regulated in ART
BRPF1	NA	NA	NA	0.583684	0.0088664	Up Regulated in ART	NA	NA	NA
BST2	-0.869483	0.0401192	Down Regulated in VP	NA	NA	NA	NA	NA	NA
BTF3	NA	NA	NA	NA	NA	NA	0.510748	0.00367717	Up Regulated in ART
BTF3L4	NA	NA	NA	-0.339185	0.00699529	Down Regulated in ART	NA	NA	NA
BUD23	NA	NA	NA	0.284411	0.0427704	Up Regulated in ART	NA	NA	NA
C11orf1	NA	NA	NA	NA	NA	NA	1.04288	0.000294642	Up Regulated in ART
C11orf54	NA	NA	NA	NA	NA	NA	-0.818312	0.00464842	Down Regulated in ART
C11orf80	NA	NA	NA	0.550893	0.0270798	Up Regulated in ART	NA	NA	NA
C11orf94	NA	NA	NA	-2.43508	0.017787	Down Regulated in ART	NA	NA	NA
C12orf42	NA	NA	NA	NA	NA	NA	0.928224	0.0386471	Up Regulated in ART
C12orf65	NA	NA	NA	NA	NA	NA	0.776723	0.001331	Up Regulated in ART
C12orf66	NA	NA	NA	NA	NA	NA	0.607557	0.0199024	Up Regulated in ART
C14orf178	NA	NA	NA	-3.32299	0.0408198	Down Regulated in ART	NA	NA	NA
C17orf53	NA	NA	NA	0.721316	0.0442896	Up Regulated in ART	NA	NA	NA
C1QA	NA	NA	NA	1.18589	0.0120914	Up Regulated in ART	NA	NA	NA
C1QB	NA	NA	NA	1.86075	0.000527435	Up Regulated in ART	NA	NA	NA
C1QBP	NA	NA	NA	NA	NA	NA	0.597112	0.00034664	Up Regulated in ART
C1orf112	NA	NA	NA	0.321453	0.0397323	Up Regulated in ART	NA	NA	NA
C2orf69	0.734248	0.0364704	Up Regulated in VP	NA	NA	NA	NA	NA	NA
C3orf38	NA	NA	NA	NA	NA	NA	0.76284	0.0122614	Up Regulated in ART
C6orf132	NA	NA	NA	-2.8313	0.0287591	Down Regulated in ART	NA	NA	NA
C8orf33	NA	NA	NA	NA	NA	NA	0.452838	0.00586033	Up Regulated in ART
C8orf59	NA	NA	NA	NA	NA	NA	0.633697	0.000125438	Up Regulated in ART
CAAP1	NA	NA	NA	-0.374896	0.0396357	Down Regulated in ART	NA	NA	NA
CAB39	NA	NA	NA	-0.345426	0.0311878	Down Regulated in ART	NA	NA	NA
CABP5	NA	NA	NA	1.24703	0.0336216	Up Regulated in ART	NA	NA	NA
CACNA2D3	NA	NA	NA	-0.688258	0.0457256	Down Regulated in ART	NA	NA	NA
CALCOCO1	NA	NA	NA	0.307049	0.00252912	Up Regulated in ART	NA	NA	NA
CALML4	NA	NA	NA	NA	NA	NA	-2.91275	0.0149894	Down Regulated in ART
CAMTA1	NA	NA	NA	NA	NA	NA	0.518194	0.0155685	Up Regulated in ART
CARD8	NA	NA	NA	NA	NA	NA	-0.480307	0.00194562	Down Regulated in ART
CASC1	NA	NA	NA	NA	NA	NA	4.20963	0.0143939	Up Regulated in ART
CASP8AP2	NA	NA	NA	-0.579874	0.0089214	Down Regulated in ART	NA	NA	NA
CASTOR3	NA	NA	NA	0.375524	0.0140905	Up Regulated in ART	NA	NA	NA
CAT	NA	NA	NA	-0.417506	0.046878	Down Regulated in ART	NA	NA	NA
CATSPERB	NA	NA	NA	NA	NA	NA	1.23817	0.0462454	Up Regulated in ART
CBL	NA	NA	NA	NA	NA	NA	-0.546052	0.0216734	Down Regulated in ART
CCDC112	NA	NA	NA	-0.387111	0.0442656	Down Regulated in ART	NA	NA	NA
CCDC122	NA	NA	NA	-1.27726	0.0148609	Down Regulated in ART	NA	NA	NA
CCDC126	NA	NA	NA	-0.693269	0.000700925	Down Regulated in ART	-0.8816	0.0124685	Down Regulated in ART
CCDC144A	NA	NA	NA	NA	NA	NA	-5.88215	0.000335528	Down Regulated in ART
CCDC152	NA	NA	NA	-0.978958	0.0160149	Down Regulated in ART	NA	NA	NA
CCDC180	NA	NA	NA	NA	NA	NA	-1.70055	0.00717444	Down Regulated in ART
CCDC58	NA	NA	NA	NA	NA	NA	0.837217	0.00550051	Up Regulated in ART
CCDC59	NA	NA	NA	NA	NA	NA	0.729963	0.0440586	Up Regulated in ART
CCDC69	NA	NA	NA	NA	NA	NA	0.499932	0.011021	Up Regulated in ART
CCDC82	NA	NA	NA	NA	NA	NA	-0.715204	0.0282951	Down Regulated in ART
CCDC91	NA	NA	NA	-0.353161	0.00941432	Down Regulated in ART	NA	NA	NA
CCL28	NA	NA	NA	NA	NA	NA	0.672286	0.0328057	Up Regulated in ART
CCN2	NA	NA	NA	3.4065	0.0148488	Up Regulated in ART	NA	NA	NA
CCNB1IP1	NA	NA	NA	NA	NA	NA	0.542981	0.0219948	Up Regulated in ART
CCNDBP1	NA	NA	NA	NA	NA	NA	0.276076	0.0384347	Up Regulated in ART
CCNG1	0.622594	0.0303399	Up Regulated in VP	-0.408374	0.0279355	Down Regulated in ART	NA	NA	NA
CCNH	NA	NA	NA	NA	NA	NA	0.70988	0.0242988	Up Regulated in ART
CCNI	0.565317	0.0424451	Up Regulated in VP	NA	NA	NA	NA	NA	NA
CCPG1	NA	NA	NA	NA	NA	NA	-1.10879	0.00377065	Down Regulated in ART
CD2BP2	NA	NA	NA	0.366039	0.00561262	Up Regulated in ART	NA	NA	NA
CD302	NA	NA	NA	-0.835506	0.0108031	Down Regulated in ART	NA	NA	NA
CD48	NA	NA	NA	NA	NA	NA	0.544139	0.00251053	Up Regulated in ART
CD52	NA	NA	NA	NA	NA	NA	0.679717	0.0242711	Up Regulated in ART
CD63	NA	NA	NA	NA	NA	NA	0.602594	0.00817871	Up Regulated in ART
CDH4	NA	NA	NA	-2.21098	0.0268508	Down Regulated in ART	NA	NA	NA
CDH6	NA	NA	NA	3.64459	0.0374983	Up Regulated in ART	NA	NA	NA
CDK5RAP1	NA	NA	NA	0.276133	0.0213961	Up Regulated in ART	NA	NA	NA
CDK7	NA	NA	NA	NA	NA	NA	0.637898	0.00332267	Up Regulated in ART
CDKAL1	NA	NA	NA	NA	NA	NA	0.517422	0.00783485	Up Regulated in ART
CDKN2A	NA	NA	NA	1.09749	0.0035699	Up Regulated in ART	NA	NA	NA
CENPC	NA	NA	NA	NA	NA	NA	0.545647	0.0274004	Up Regulated in ART
CEP104	NA	NA	NA	NA	NA	NA	-0.450249	0.000215318	Down Regulated in ART
CERS5	NA	NA	NA	0.216518	0.0427966	Up Regulated in ART	NA	NA	NA
CETN2	NA	NA	NA	NA	NA	NA	0.606277	0.0158298	Up Regulated in ART
CFAP57	NA	NA	NA	1.86548	0.00841398	Up Regulated in ART	NA	NA	NA
CHD4	NA	NA	NA	0.378669	0.0179446	Up Regulated in ART	NA	NA	NA
CHD5	NA	NA	NA	1.55149	0.0233097	Up Regulated in ART	NA	NA	NA
CHIC2	NA	NA	NA	NA	NA	NA	0.823308	2.51528e-05	Up Regulated in ART
CHKB	NA	NA	NA	0.720392	0.00483707	Up Regulated in ART	-0.713659	0.0245576	Down Regulated in ART
CHKBCPT1B	NA	NA	NA	NA	NA	NA	-1.38336	0.0420885	Down Regulated in ART
CHMP3	NA	NA	NA	-0.26927	0.00904722	Down Regulated in ART	NA	NA	NA
CHRAC1	NA	NA	NA	-0.295585	0.0410417	Down Regulated in ART	NA	NA	NA
CHTOP	NA	NA	NA	NA	NA	NA	0.316678	0.00550051	Up Regulated in ART
CLEC16A	NA	NA	NA	NA	NA	NA	-0.435069	0.00429767	Down Regulated in ART
CLEC4A	NA	NA	NA	-0.78006	0.0110935	Down Regulated in ART	-1.16324	0.030309	Down Regulated in ART
CLEC4C	NA	NA	NA	-1.43213	0.00039719	Down Regulated in ART	-1.35466	0.026585	Down Regulated in ART
CLPTM1	NA	NA	NA	NA	NA	NA	-0.370773	0.0314948	Down Regulated in ART
CMKLR1	NA	NA	NA	-0.876729	0.0343864	Down Regulated in ART	-1.34431	0.0264159	Down Regulated in ART
CMPK1	0.703886	0.0462782	Up Regulated in VP	NA	NA	NA	NA	NA	NA
CMTR1	NA	NA	NA	0.336672	0.0159531	Up Regulated in ART	NA	NA	NA
CNIH1	NA	NA	NA	-0.346072	0.0374458	Down Regulated in ART	NA	NA	NA
CNN1	NA	NA	NA	2.32554	0.00658109	Up Regulated in ART	NA	NA	NA
CNOT6L	0.84171	0.0462632	Up Regulated in VP	NA	NA	NA	NA	NA	NA
COA1	NA	NA	NA	NA	NA	NA	0.504906	0.00215651	Up Regulated in ART
COBL	NA	NA	NA	-2.17837	0.0342707	Down Regulated in ART	NA	NA	NA
COL10A1	NA	NA	NA	3.37334	0.0132008	Up Regulated in ART	NA	NA	NA
COMMD1	NA	NA	NA	NA	NA	NA	0.591738	0.00228577	Up Regulated in ART
COMMD8	NA	NA	NA	-0.520193	0.00145488	Down Regulated in ART	NA	NA	NA
COPRS	NA	NA	NA	0.44737	0.00426765	Up Regulated in ART	0.75844	0.00679084	Up Regulated in ART
COQ10A	NA	NA	NA	0.371784	0.042908	Up Regulated in ART	NA	NA	NA
COQ10B	NA	NA	NA	NA	NA	NA	0.894576	0.0263233	Up Regulated in ART
COX10	NA	NA	NA	-0.272884	0.0470189	Down Regulated in ART	NA	NA	NA
COX11	NA	NA	NA	-0.447418	0.0280109	Down Regulated in ART	NA	NA	NA
COX14	NA	NA	NA	NA	NA	NA	0.645829	0.0391255	Up Regulated in ART
COX5A	NA	NA	NA	NA	NA	NA	0.625901	0.00232772	Up Regulated in ART
COX6A1	NA	NA	NA	NA	NA	NA	0.747245	0.000434076	Up Regulated in ART
COX6B1	NA	NA	NA	NA	NA	NA	0.819714	0.000425794	Up Regulated in ART
COX6C	NA	NA	NA	NA	NA	NA	1.0654	1.24226e-09	Up Regulated in ART
COX7A2	NA	NA	NA	NA	NA	NA	0.975958	7.4957e-06	Up Regulated in ART
COX7B	NA	NA	NA	NA	NA	NA	0.825145	5.95698e-05	Up Regulated in ART
COX7C	NA	NA	NA	NA	NA	NA	1.18349	2.49015e-08	Up Regulated in ART
CPT1B	NA	NA	NA	0.737364	0.0477651	Up Regulated in ART	NA	NA	NA
CRADD	NA	NA	NA	NA	NA	NA	0.689435	0.0267777	Up Regulated in ART
CRAMP1	NA	NA	NA	NA	NA	NA	-0.618136	0.00248142	Down Regulated in ART
CRCP	NA	NA	NA	NA	NA	NA	0.577822	0.00616823	Up Regulated in ART
CREBL2	NA	NA	NA	-0.616458	0.000293062	Down Regulated in ART	-0.56872	0.0235137	Down Regulated in ART
CRY2	NA	NA	NA	0.376816	0.0352978	Up Regulated in ART	0.644311	0.0236934	Up Regulated in ART
CRYGS	NA	NA	NA	0.593831	0.0252199	Up Regulated in ART	NA	NA	NA
CSNK1D	NA	NA	NA	0.270358	0.0307215	Up Regulated in ART	NA	NA	NA
CTSO	NA	NA	NA	-0.525554	0.0122808	Down Regulated in ART	NA	NA	NA
CUX2	NA	NA	NA	NA	NA	NA	-1.54527	0.0481734	Down Regulated in ART
CWC15	NA	NA	NA	NA	NA	NA	0.780586	0.000205736	Up Regulated in ART
CXCR2	NA	NA	NA	-1.2833	0.000886908	Down Regulated in ART	-1.36685	0.0173783	Down Regulated in ART
CYP4V2	NA	NA	NA	NA	NA	NA	-0.924053	0.0233736	Down Regulated in ART
CYTH4	-0.621682	0.0418296	Down Regulated in VP	NA	NA	NA	NA	NA	NA
CYTIP	NA	NA	NA	NA	NA	NA	0.742203	0.00367717	Up Regulated in ART
CYYR1	NA	NA	NA	-1.76774	0.0217395	Down Regulated in ART	NA	NA	NA
DAD1	NA	NA	NA	NA	NA	NA	0.632262	0.00119097	Up Regulated in ART
DAP3	NA	NA	NA	NA	NA	NA	0.355992	0.0303447	Up Regulated in ART
DAZAP2	NA	NA	NA	NA	NA	NA	0.445273	0.0214755	Up Regulated in ART
DBI	NA	NA	NA	NA	NA	NA	0.682322	0.000230042	Up Regulated in ART
DCAF17	NA	NA	NA	-0.491797	0.0342707	Down Regulated in ART	NA	NA	NA
DCTN1	NA	NA	NA	NA	NA	NA	-0.336367	0.0128264	Down Regulated in ART
DCUN1D2	NA	NA	NA	0.315086	0.0192337	Up Regulated in ART	NA	NA	NA
DDB2	NA	NA	NA	0.32159	0.0320187	Up Regulated in ART	NA	NA	NA
DDX19B	NA	NA	NA	NA	NA	NA	0.34671	0.0139889	Up Regulated in ART
DDX28	NA	NA	NA	NA	NA	NA	0.771578	0.000915312	Up Regulated in ART
DEDD	NA	NA	NA	0.282361	0.0078122	Up Regulated in ART	0.538166	0.000109345	Up Regulated in ART
DENR	NA	NA	NA	-0.371513	0.0198026	Down Regulated in ART	NA	NA	NA
DGKH	NA	NA	NA	NA	NA	NA	-0.869412	0.0359481	Down Regulated in ART
DHX33	NA	NA	NA	NA	NA	NA	-0.538481	0.00265405	Down Regulated in ART
DHX38	NA	NA	NA	0.325934	0.00191169	Up Regulated in ART	NA	NA	NA
DHX40	0.54037	0.0481282	Up Regulated in VP	NA	NA	NA	NA	NA	NA
DIDO1	NA	NA	NA	0.282665	0.0255831	Up Regulated in ART	NA	NA	NA
DIP2A	NA	NA	NA	NA	NA	NA	-1.0257	0.00542717	Down Regulated in ART
DLAT	NA	NA	NA	-0.452679	0.00348125	Down Regulated in ART	NA	NA	NA
DLC1	NA	NA	NA	1.12437	0.00485922	Up Regulated in ART	NA	NA	NA
DLEU7	NA	NA	NA	-1.1148	0.0222425	Down Regulated in ART	NA	NA	NA
DMAC1	NA	NA	NA	NA	NA	NA	0.734952	0.000670499	Up Regulated in ART
DNAJC30	NA	NA	NA	NA	NA	NA	0.98779	0.00834889	Up Regulated in ART
DNM1	NA	NA	NA	1.12281	0.00294185	Up Regulated in ART	NA	NA	NA
DNPEP	NA	NA	NA	0.517951	0.00195547	Up Regulated in ART	NA	NA	NA
DPH1	NA	NA	NA	0.373535	0.0437503	Up Regulated in ART	NA	NA	NA
DPH6	NA	NA	NA	-0.3216	0.0422815	Down Regulated in ART	NA	NA	NA
DPM1	NA	NA	NA	NA	NA	NA	0.61057	0.0144576	Up Regulated in ART
DPY19L3	NA	NA	NA	NA	NA	NA	-0.611527	0.0102884	Down Regulated in ART
DSG2	NA	NA	NA	-1.66098	0.00246208	Down Regulated in ART	NA	NA	NA
DTWD1	NA	NA	NA	-0.389291	0.0362222	Down Regulated in ART	NA	NA	NA
DTWD2	NA	NA	NA	-0.742239	0.00388461	Down Regulated in ART	NA	NA	NA
DTX3	NA	NA	NA	0.414763	0.0422815	Up Regulated in ART	NA	NA	NA
DUS4L	NA	NA	NA	NA	NA	NA	0.575509	0.0221812	Up Regulated in ART
DYNC1H1	NA	NA	NA	NA	NA	NA	-0.561905	0.0177655	Down Regulated in ART
DYNLRB1	NA	NA	NA	NA	NA	NA	0.476026	0.0306399	Up Regulated in ART
E2F1	NA	NA	NA	0.708761	0.0307215	Up Regulated in ART	NA	NA	NA
EDN1	NA	NA	NA	1.09349	0.0207104	Up Regulated in ART	NA	NA	NA
EEA1	NA	NA	NA	-0.567178	0.0215708	Down Regulated in ART	-0.646935	0.0493876	Down Regulated in ART
EGLN1	NA	NA	NA	-0.410811	0.0262776	Down Regulated in ART	-0.576729	0.0228383	Down Regulated in ART
EID1	NA	NA	NA	-0.536513	0.00429864	Down Regulated in ART	NA	NA	NA
EID2	NA	NA	NA	NA	NA	NA	0.906699	3.74306e-05	Up Regulated in ART
EIF2B4	NA	NA	NA	0.369773	0.00873915	Up Regulated in ART	NA	NA	NA
EIF3D	NA	NA	NA	NA	NA	NA	0.541936	0.00278804	Up Regulated in ART
EIF3E	NA	NA	NA	NA	NA	NA	0.49307	0.0371019	Up Regulated in ART
EIF3F	NA	NA	NA	NA	NA	NA	0.473789	0.0096223	Up Regulated in ART
EIF3H	NA	NA	NA	NA	NA	NA	0.439328	0.00888526	Up Regulated in ART
EIF3I	NA	NA	NA	NA	NA	NA	0.371079	0.0223091	Up Regulated in ART
EIF3K	NA	NA	NA	NA	NA	NA	0.515381	0.0128264	Up Regulated in ART
EIF4EBP3	NA	NA	NA	NA	NA	NA	-1.71027	0.00550051	Down Regulated in ART
EIF5A	NA	NA	NA	NA	NA	NA	0.60204	0.000612758	Up Regulated in ART
ELK3	NA	NA	NA	-0.452632	0.0078122	Down Regulated in ART	NA	NA	NA
ELMOD3	NA	NA	NA	0.385752	0.00241621	Up Regulated in ART	NA	NA	NA
ELP4	NA	NA	NA	-0.294804	0.0349117	Down Regulated in ART	NA	NA	NA
EMG1	NA	NA	NA	NA	NA	NA	0.571311	0.000214695	Up Regulated in ART
EMP3	-0.681578	0.0389909	Down Regulated in VP	NA	NA	NA	NA	NA	NA
ENSA	NA	NA	NA	NA	NA	NA	0.550348	3.8393e-05	Up Regulated in ART
EP400	NA	NA	NA	NA	NA	NA	-0.723596	6.20883e-06	Down Regulated in ART
EPC2	NA	NA	NA	-0.35279	0.0269877	Down Regulated in ART	NA	NA	NA
EPM2AIP1	NA	NA	NA	NA	NA	NA	0.747158	0.00695264	Up Regulated in ART
ERCC3	NA	NA	NA	0.284933	0.0343209	Up Regulated in ART	NA	NA	NA
ERCC8	NA	NA	NA	-0.377147	0.0205199	Down Regulated in ART	NA	NA	NA
ERH	NA	NA	NA	NA	NA	NA	0.781989	1.61315e-08	Up Regulated in ART
ESF1	NA	NA	NA	-0.37281	0.0242709	Down Regulated in ART	NA	NA	NA
ETFB	-0.975185	0.0439676	Down Regulated in VP	NA	NA	NA	NA	NA	NA
ETFDH	NA	NA	NA	-0.490576	0.00947618	Down Regulated in ART	NA	NA	NA
ETFRF1	NA	NA	NA	-0.499909	0.00947618	Down Regulated in ART	NA	NA	NA
EVI2A	NA	NA	NA	-0.658647	0.00289158	Down Regulated in ART	NA	NA	NA
EXOG	NA	NA	NA	0.380094	0.0496037	Up Regulated in ART	NA	NA	NA
EZR	NA	NA	NA	NA	NA	NA	0.692983	0.0220649	Up Regulated in ART
FADD	NA	NA	NA	NA	NA	NA	0.763527	0.00539272	Up Regulated in ART
FAM120A	NA	NA	NA	NA	NA	NA	-0.547375	0.000439773	Down Regulated in ART
FAM174A	NA	NA	NA	-0.55275	0.0092522	Down Regulated in ART	NA	NA	NA
FAM204A	NA	NA	NA	NA	NA	NA	0.340295	0.0275453	Up Regulated in ART
FAM206A	NA	NA	NA	-0.294526	0.0268508	Down Regulated in ART	NA	NA	NA
FAM209A	NA	NA	NA	0.625657	0.0201111	Up Regulated in ART	NA	NA	NA
FAM20A	NA	NA	NA	1.60866	0.0160149	Up Regulated in ART	NA	NA	NA
FAM241A	NA	NA	NA	-0.540932	0.0262776	Down Regulated in ART	-0.789707	0.0403827	Down Regulated in ART
FASTKD5	NA	NA	NA	NA	NA	NA	0.9134	0.0141497	Up Regulated in ART
FBXL17	0.711404	0.0309342	Up Regulated in VP	NA	NA	NA	NA	NA	NA
FBXO25	0.391279	0.0282479	Up Regulated in VP	NA	NA	NA	NA	NA	NA
FBXO34	NA	NA	NA	NA	NA	NA	0.910255	0.000216285	Up Regulated in ART
FBXO8	NA	NA	NA	NA	NA	NA	1.09335	0.000356589	Up Regulated in ART
FCGR3B	NA	NA	NA	NA	NA	NA	-4.25868	0.0117424	Down Regulated in ART
FDPS	NA	NA	NA	NA	NA	NA	0.353709	0.0234857	Up Regulated in ART
FEZ2	NA	NA	NA	-0.460835	0.013828	Down Regulated in ART	NA	NA	NA
FGGY	NA	NA	NA	0.551923	0.00441697	Up Regulated in ART	NA	NA	NA
FHOD1	-0.891449	0.0148255	Down Regulated in VP	0.497963	0.0160149	Up Regulated in ART	NA	NA	NA
FMC1	-1.63574	0.0462632	Down Regulated in VP	NA	NA	NA	NA	NA	NA
FMNL3	NA	NA	NA	-0.394606	0.0390521	Down Regulated in ART	NA	NA	NA
FMR1	NA	NA	NA	NA	NA	NA	-0.60223	0.0291052	Down Regulated in ART
FN1	NA	NA	NA	2.65425	0.0231818	Up Regulated in ART	NA	NA	NA
FOXRED2	NA	NA	NA	NA	NA	NA	-1.07655	0.0178118	Down Regulated in ART
FP5652606	NA	NA	NA	NA	NA	NA	-1.08327	0.00851537	Down Regulated in ART
FPR3	NA	NA	NA	-1.36712	0.00482299	Down Regulated in ART	-2.33992	9.23335e-05	Down Regulated in ART
FTCDNL1	NA	NA	NA	NA	NA	NA	0.94072	0.0366851	Up Regulated in ART
FTH1	NA	NA	NA	NA	NA	NA	0.63327	0.0462454	Up Regulated in ART
FUBP3	NA	NA	NA	NA	NA	NA	-0.530558	0.000884454	Down Regulated in ART
FUNDC2	NA	NA	NA	NA	NA	NA	0.569671	4.96599e-05	Up Regulated in ART
FZD6	NA	NA	NA	-1.00561	0.0265284	Down Regulated in ART	NA	NA	NA
GABARAP	NA	NA	NA	NA	NA	NA	-1.748	7.73448e-18	Down Regulated in ART
GALNT6	NA	NA	NA	-0.367482	0.03603	Down Regulated in ART	NA	NA	NA
GAPT	NA	NA	NA	-0.837472	0.0108031	Down Regulated in ART	NA	NA	NA
GATAD1	NA	NA	NA	NA	NA	NA	-0.412737	0.0121096	Down Regulated in ART
GBE1	NA	NA	NA	-0.425053	0.0184882	Down Regulated in ART	NA	NA	NA
GEMIN4	NA	NA	NA	NA	NA	NA	0.571252	0.0246718	Up Regulated in ART
GEMIN5	NA	NA	NA	-0.437883	0.00149968	Down Regulated in ART	NA	NA	NA
GEMIN7	-0.719678	0.0429542	Down Regulated in VP	NA	NA	NA	NA	NA	NA
GGA3	NA	NA	NA	0.260934	0.0284528	Up Regulated in ART	NA	NA	NA
GID4	NA	NA	NA	-0.527447	0.0262776	Down Regulated in ART	-0.652677	0.0429535	Down Regulated in ART
GIPR	NA	NA	NA	0.86267	0.000560381	Up Regulated in ART	NA	NA	NA
GLB1L3	NA	NA	NA	0.929806	0.00947618	Up Regulated in ART	NA	NA	NA
GMCL1	NA	NA	NA	-0.560024	0.0234469	Down Regulated in ART	-0.730076	0.0223131	Down Regulated in ART
GMFG	NA	NA	NA	NA	NA	NA	0.655619	0.000180717	Up Regulated in ART
GMPR	NA	NA	NA	1.03198	0.0279355	Up Regulated in ART	NA	NA	NA
GNAS	NA	NA	NA	0.250311	0.0291429	Up Regulated in ART	0.370576	0.00916796	Up Regulated in ART
GOLGA2	NA	NA	NA	NA	NA	NA	-0.458802	0.000567977	Down Regulated in ART
GOLGA3	NA	NA	NA	NA	NA	NA	-0.539997	0.000125438	Down Regulated in ART
GOLGA5	NA	NA	NA	-0.334939	0.00841027	Down Regulated in ART	NA	NA	NA
GOLGA8R	NA	NA	NA	NA	NA	NA	-1.59438	0.0231884	Down Regulated in ART
GOPC	NA	NA	NA	NA	NA	NA	-0.516852	0.0460604	Down Regulated in ART
GPAT3	NA	NA	NA	-0.651213	0.0320187	Down Regulated in ART	NA	NA	NA
GPATCH11	NA	NA	NA	-0.639244	0.00114745	Down Regulated in ART	NA	NA	NA
GPR142	NA	NA	NA	NA	NA	NA	-4.20512	0.0386742	Down Regulated in ART
GPR160	NA	NA	NA	-0.6405	0.0195257	Down Regulated in ART	NA	NA	NA
GPR18	NA	NA	NA	NA	NA	NA	0.985473	0.0138955	Up Regulated in ART
GPR183	NA	NA	NA	NA	NA	NA	0.950012	0.0234362	Up Regulated in ART
GPR34	NA	NA	NA	NA	NA	NA	-2.12614	0.0341753	Down Regulated in ART
GRIK3	NA	NA	NA	NA	NA	NA	-4.32233	0.0473795	Down Regulated in ART
GSE1	NA	NA	NA	NA	NA	NA	-0.586123	0.019065	Down Regulated in ART
GSPT2	NA	NA	NA	NA	NA	NA	0.601959	0.0469321	Up Regulated in ART
GSTM4	NA	NA	NA	NA	NA	NA	1.34732	0.0255798	Up Regulated in ART
GTF2A1	NA	NA	NA	NA	NA	NA	-0.860589	0.0138955	Down Regulated in ART
GTF2H3	NA	NA	NA	-0.462387	0.0057223	Down Regulated in ART	NA	NA	NA
GTF3A	NA	NA	NA	NA	NA	NA	0.61149	0.00154121	Up Regulated in ART
GTF3C2	NA	NA	NA	0.245603	0.0190123	Up Regulated in ART	NA	NA	NA
GTPBP1	NA	NA	NA	0.428946	0.0253587	Up Regulated in ART	NA	NA	NA
GTPBP10	NA	NA	NA	-0.568257	0.00775415	Down Regulated in ART	NA	NA	NA
GTPBP2	NA	NA	NA	0.281332	0.0332961	Up Regulated in ART	NA	NA	NA
GTPBP4	NA	NA	NA	0.374605	0.00980957	Up Regulated in ART	0.591978	0.00869212	Up Regulated in ART
GTPBP8	NA	NA	NA	-0.31298	0.0260333	Down Regulated in ART	NA	NA	NA
GUCD1	NA	NA	NA	0.391883	0.00561262	Up Regulated in ART	0.606163	0.00401237	Up Regulated in ART
H2AFV	NA	NA	NA	NA	NA	NA	0.400013	0.0294404	Up Regulated in ART
H3F3A	NA	NA	NA	NA	NA	NA	0.619015	0.00197571	Up Regulated in ART
HACD2	NA	NA	NA	-0.377736	0.0296301	Down Regulated in ART	NA	NA	NA
HAMP	NA	NA	NA	2.09053	0.0189675	Up Regulated in ART	NA	NA	NA
HBD	NA	NA	NA	NA	NA	NA	3.91531	0.0140055	Up Regulated in ART
HBM	NA	NA	NA	4.37702	0.0215708	Up Regulated in ART	NA	NA	NA
HDAC10	NA	NA	NA	0.719226	0.0377026	Up Regulated in ART	-0.987819	0.0246809	Down Regulated in ART
HDHD2	NA	NA	NA	NA	NA	NA	-0.965229	0.0120173	Down Regulated in ART
HEATR5A	NA	NA	NA	NA	NA	NA	-0.704561	0.0163668	Down Regulated in ART
HECTD3	NA	NA	NA	0.499921	7.17293e-05	Up Regulated in ART	NA	NA	NA
HECTD4	NA	NA	NA	NA	NA	NA	-0.568809	0.0186761	Down Regulated in ART
HERC2	NA	NA	NA	NA	NA	NA	-0.569933	0.0156095	Down Regulated in ART
HEXIM1	NA	NA	NA	NA	NA	NA	-1.18167	4.0697e-06	Down Regulated in ART
HGD	NA	NA	NA	0.927101	0.0195257	Up Regulated in ART	NA	NA	NA
HHEX	NA	NA	NA	0.494339	0.0313223	Up Regulated in ART	NA	NA	NA
HIPK3	NA	NA	NA	-0.611908	0.0095345	Down Regulated in ART	-0.722822	0.0297253	Down Regulated in ART
HIPK4	NA	NA	NA	3.31719	0.0159531	Up Regulated in ART	NA	NA	NA
HIST1H1C	NA	NA	NA	0.564047	0.0414943	Up Regulated in ART	NA	NA	NA
HIST1H2BG	NA	NA	NA	0.799648	0.0358671	Up Regulated in ART	NA	NA	NA
HLADMA	NA	NA	NA	0.445228	0.0247578	Up Regulated in ART	NA	NA	NA
HMGXB3	NA	NA	NA	0.308178	0.0101836	Up Regulated in ART	NA	NA	NA
HNRNPC	NA	NA	NA	NA	NA	NA	0.350366	0.00248218	Up Regulated in ART
HNRNPLL	NA	NA	NA	-0.321965	0.0262776	Down Regulated in ART	NA	NA	NA
HOOK3	NA	NA	NA	NA	NA	NA	-0.801845	0.00590215	Down Regulated in ART
HOXB3	NA	NA	NA	NA	NA	NA	-1.22762	0.0145082	Down Regulated in ART
HS3ST3B1	NA	NA	NA	-0.553495	0.0280548	Down Regulated in ART	NA	NA	NA
HSDL2	NA	NA	NA	-0.582671	0.0108031	Down Regulated in ART	NA	NA	NA
HSH2D	NA	NA	NA	0.678461	0.000753149	Up Regulated in ART	NA	NA	NA
HTT	NA	NA	NA	NA	NA	NA	-0.485783	0.00442775	Down Regulated in ART
IAH1	NA	NA	NA	NA	NA	NA	0.447754	0.0149894	Up Regulated in ART
ICE2	NA	NA	NA	-0.404504	0.00980957	Down Regulated in ART	NA	NA	NA
IDH3B	NA	NA	NA	NA	NA	NA	0.377343	0.0121096	Up Regulated in ART
IFI27L1	NA	NA	NA	NA	NA	NA	0.824001	0.0433381	Up Regulated in ART
IFI6	-1.78354	0.0418296	Down Regulated in VP	NA	NA	NA	NA	NA	NA
IFITM2	-0.999351	0.0386302	Down Regulated in VP	NA	NA	NA	NA	NA	NA
IFT27	NA	NA	NA	0.346308	0.0476645	Up Regulated in ART	NA	NA	NA
IFT57	NA	NA	NA	NA	NA	NA	0.548817	0.012422	Up Regulated in ART
IGBP1	NA	NA	NA	NA	NA	NA	0.517955	0.0102884	Up Regulated in ART
IL12A	NA	NA	NA	0.821486	0.0399875	Up Regulated in ART	NA	NA	NA
IL2	NA	NA	NA	-1.98076	0.0449989	Down Regulated in ART	NA	NA	NA
IL23A	NA	NA	NA	NA	NA	NA	0.97017	0.0216734	Up Regulated in ART
IL6R	NA	NA	NA	-0.462203	0.0217008	Down Regulated in ART	NA	NA	NA
IMMP1L	NA	NA	NA	NA	NA	NA	0.721911	0.0432365	Up Regulated in ART
IMPACT	NA	NA	NA	-0.42686	0.00925107	Down Regulated in ART	NA	NA	NA
ING3	NA	NA	NA	NA	NA	NA	0.478443	0.0194522	Up Regulated in ART
INPP4A	NA	NA	NA	NA	NA	NA	-0.592077	0.000870357	Down Regulated in ART
IPMK	NA	NA	NA	NA	NA	NA	-0.913186	0.030309	Down Regulated in ART
IPO13	NA	NA	NA	NA	NA	NA	-0.48132	0.0181956	Down Regulated in ART
IQSEC1	NA	NA	NA	0.465316	0.00400041	Up Regulated in ART	NA	NA	NA
IRGQ	NA	NA	NA	0.635509	0.0485352	Up Regulated in ART	NA	NA	NA
ISCA2	NA	NA	NA	NA	NA	NA	0.68491	0.00875131	Up Regulated in ART
ITGA10	NA	NA	NA	0.550051	0.00991769	Up Regulated in ART	NA	NA	NA
ITGA7	NA	NA	NA	0.567681	0.0474868	Up Regulated in ART	NA	NA	NA
ITGAE	NA	NA	NA	NA	NA	NA	0.790378	0.000256689	Up Regulated in ART
ITGAV	NA	NA	NA	NA	NA	NA	-0.932709	0.00776492	Down Regulated in ART
ITGAX	-0.772878	0.0460329	Down Regulated in VP	NA	NA	NA	NA	NA	NA
JAGN1	NA	NA	NA	NA	NA	NA	0.413728	0.0257246	Up Regulated in ART
KANSL2	NA	NA	NA	NA	NA	NA	0.899465	0.0188989	Up Regulated in ART
KBTBD11	NA	NA	NA	-0.486173	0.0362222	Down Regulated in ART	NA	NA	NA
KBTBD4	NA	NA	NA	NA	NA	NA	0.852626	0.00818016	Up Regulated in ART
KCMF1	NA	NA	NA	NA	NA	NA	0.415065	0.0106463	Up Regulated in ART
KCNE3	NA	NA	NA	-0.741664	0.0160149	Down Regulated in ART	NA	NA	NA
KCNMB3	NA	NA	NA	0.853193	0.0120914	Up Regulated in ART	NA	NA	NA
KCP	NA	NA	NA	1.63783	0.0120914	Up Regulated in ART	NA	NA	NA
KEL	NA	NA	NA	1.44657	0.0150027	Up Regulated in ART	NA	NA	NA
KHDC1	NA	NA	NA	0.827589	0.0445194	Up Regulated in ART	NA	NA	NA
KHDC4	NA	NA	NA	0.589822	0.00191169	Up Regulated in ART	NA	NA	NA
KHDRBS1	NA	NA	NA	-0.214747	0.0101853	Down Regulated in ART	NA	NA	NA
KIAA1143	0.49655	0.0426232	Up Regulated in VP	NA	NA	NA	NA	NA	NA
KIAA1211L	NA	NA	NA	-1.13182	0.0350534	Down Regulated in ART	NA	NA	NA
KIF16B	NA	NA	NA	-0.526735	0.0332322	Down Regulated in ART	NA	NA	NA
KIF22	NA	NA	NA	0.381912	0.0362222	Up Regulated in ART	NA	NA	NA
KLHDC10	NA	NA	NA	NA	NA	NA	-0.413965	0.0419546	Down Regulated in ART
KLHL14	NA	NA	NA	1.17048	0.0258211	Up Regulated in ART	NA	NA	NA
KMT2D	NA	NA	NA	NA	NA	NA	-0.926173	0.000620083	Down Regulated in ART
KPNA4	NA	NA	NA	-0.307095	0.0362222	Down Regulated in ART	NA	NA	NA
KRCC1	NA	NA	NA	-0.488167	0.0223681	Down Regulated in ART	NA	NA	NA
KTI12	NA	NA	NA	NA	NA	NA	0.721785	0.0182403	Up Regulated in ART
KTN1	0.429087	0.0130577	Up Regulated in VP	NA	NA	NA	NA	NA	NA
L2HGDH	NA	NA	NA	-0.576878	0.00354198	Down Regulated in ART	-0.777931	0.0350017	Down Regulated in ART
L3MBTL1	NA	NA	NA	0.404288	0.0241621	Up Regulated in ART	NA	NA	NA
LAMTOR5	NA	NA	NA	NA	NA	NA	0.605232	0.00431979	Up Regulated in ART
LARS	NA	NA	NA	-0.333838	0.0288596	Down Regulated in ART	NA	NA	NA
LAT	NA	NA	NA	0.901572	0.000406787	Up Regulated in ART	NA	NA	NA
LAYN	NA	NA	NA	0.998962	0.0211	Up Regulated in ART	NA	NA	NA
LCN2	NA	NA	NA	1.20248	0.0279355	Up Regulated in ART	NA	NA	NA
LEPROTL1	NA	NA	NA	NA	NA	NA	0.744088	0.0135314	Up Regulated in ART
LILRA4	NA	NA	NA	NA	NA	NA	-1.09738	0.0391255	Down Regulated in ART
LIMS1	NA	NA	NA	NA	NA	NA	-0.705458	0.0436025	Down Regulated in ART
LIN54	NA	NA	NA	-0.464093	0.0211314	Down Regulated in ART	NA	NA	NA
LIN7C	0.651508	0.0401192	Up Regulated in VP	NA	NA	NA	NA	NA	NA
LINC00672	NA	NA	NA	NA	NA	NA	-0.939343	0.00795981	Down Regulated in ART
LINGO4	NA	NA	NA	-2.27833	0.0427704	Down Regulated in ART	NA	NA	NA
LIPA	NA	NA	NA	-0.498939	0.0367168	Down Regulated in ART	NA	NA	NA
LIPN	NA	NA	NA	-0.739362	0.0268508	Down Regulated in ART	NA	NA	NA
LMBRD2	NA	NA	NA	-0.542324	0.0262776	Down Regulated in ART	-0.924917	0.00587472	Down Regulated in ART
LONRF1	NA	NA	NA	0.600542	0.0109125	Up Regulated in ART	NA	NA	NA
LRP1	NA	NA	NA	NA	NA	NA	-1.04067	0.0390584	Down Regulated in ART
LRP12	NA	NA	NA	-0.675883	0.0362222	Down Regulated in ART	NA	NA	NA
LRRC8D	NA	NA	NA	-0.356235	0.0422815	Down Regulated in ART	NA	NA	NA
LRRC9	-16.4517	0.0179661	Down Regulated in VP	NA	NA	NA	NA	NA	NA
LSM3	NA	NA	NA	NA	NA	NA	0.69161	2.94723e-06	Up Regulated in ART
LSM8	NA	NA	NA	NA	NA	NA	0.464025	0.0132702	Up Regulated in ART
LY6E	-1.32721	0.0309342	Down Regulated in VP	NA	NA	NA	NA	NA	NA
LY75	NA	NA	NA	NA	NA	NA	-0.972815	0.00403288	Down Regulated in ART
LYG1	NA	NA	NA	0.756514	0.00853183	Up Regulated in ART	NA	NA	NA
LYRM2	NA	NA	NA	NA	NA	NA	0.527674	0.017027	Up Regulated in ART
LYRM4	NA	NA	NA	NA	NA	NA	0.638755	0.0293548	Up Regulated in ART
LYRM7	NA	NA	NA	-0.534973	0.031992	Down Regulated in ART	NA	NA	NA
LZTFL1	NA	NA	NA	-0.376328	0.0380714	Down Regulated in ART	NA	NA	NA
MAD2L1BP	NA	NA	NA	NA	NA	NA	0.700211	0.0106573	Up Regulated in ART
MAGOH	NA	NA	NA	NA	NA	NA	0.664754	0.000205736	Up Regulated in ART
MAIP1	NA	NA	NA	NA	NA	NA	0.77622	0.0234362	Up Regulated in ART
MALSU1	NA	NA	NA	0.347464	0.0289005	Up Regulated in ART	0.634562	0.0144611	Up Regulated in ART
MANBAL	NA	NA	NA	NA	NA	NA	0.534975	0.0108314	Up Regulated in ART
MAP1LC3A	-1.70626	0.0239472	Down Regulated in VP	NA	NA	NA	NA	NA	NA
MAP3K13	NA	NA	NA	-0.317755	0.038404	Down Regulated in ART	NA	NA	NA
MAPK12	-2.1919	0.0206348	Down Regulated in VP	NA	NA	NA	NA	NA	NA
MARS	NA	NA	NA	0.305173	0.000661719	Up Regulated in ART	NA	NA	NA
MARS2	NA	NA	NA	NA	NA	NA	0.626219	0.0260045	Up Regulated in ART
MAST3	NA	NA	NA	NA	NA	NA	-0.73288	0.00315744	Down Regulated in ART
MATN1	NA	NA	NA	1.03166	0.0407084	Up Regulated in ART	NA	NA	NA
MAU2	NA	NA	NA	NA	NA	NA	-0.310291	0.0345065	Down Regulated in ART
MCM3AP	NA	NA	NA	0.269136	0.00191169	Up Regulated in ART	NA	NA	NA
MCM7	NA	NA	NA	0.315474	0.0343864	Up Regulated in ART	0.432509	0.00948089	Up Regulated in ART
MCM9	NA	NA	NA	NA	NA	NA	0.614682	0.0372397	Up Regulated in ART
MCOLN2	NA	NA	NA	0.641681	0.0250603	Up Regulated in ART	NA	NA	NA
MDK	NA	NA	NA	0.842859	0.0150894	Up Regulated in ART	NA	NA	NA
MEA1	NA	NA	NA	NA	NA	NA	0.662599	0.00887868	Up Regulated in ART
MEAF6	NA	NA	NA	-0.260151	0.0326535	Down Regulated in ART	NA	NA	NA
MEAK7	NA	NA	NA	NA	NA	NA	-0.700051	0.000918867	Down Regulated in ART
MED12	NA	NA	NA	NA	NA	NA	-0.53407	0.0118966	Down Regulated in ART
MED27	NA	NA	NA	NA	NA	NA	0.566082	0.00503015	Up Regulated in ART
MED28	NA	NA	NA	NA	NA	NA	0.407292	0.0173979	Up Regulated in ART
MED9	NA	NA	NA	NA	NA	NA	0.895689	0.016928	Up Regulated in ART
MEMO1	NA	NA	NA	NA	NA	NA	-0.973054	0.0216734	Down Regulated in ART
MEST	NA	NA	NA	NA	NA	NA	1.08013	0.0361293	Up Regulated in ART
METTL3	NA	NA	NA	0.433993	0.00991769	Up Regulated in ART	NA	NA	NA
MFSD5	NA	NA	NA	0.342998	0.0252208	Up Regulated in ART	NA	NA	NA
MGST3	NA	NA	NA	NA	NA	NA	0.511321	0.00996429	Up Regulated in ART
MISP3	NA	NA	NA	0.925828	0.0332322	Up Regulated in ART	1.20575	0.0465452	Up Regulated in ART
MLLT3	NA	NA	NA	NA	NA	NA	1.17734	2.05491e-05	Up Regulated in ART
MOAP1	NA	NA	NA	NA	NA	NA	0.841696	0.0121096	Up Regulated in ART
MOB1B	NA	NA	NA	NA	NA	NA	-0.799276	0.0202451	Down Regulated in ART
MORF4L1	NA	NA	NA	NA	NA	NA	0.422448	0.0236774	Up Regulated in ART
MOV10	NA	NA	NA	0.578244	0.00273609	Up Regulated in ART	NA	NA	NA
MPZL2	NA	NA	NA	-0.67919	0.0102549	Down Regulated in ART	-1.16613	0.0299065	Down Regulated in ART
MRE11	NA	NA	NA	NA	NA	NA	-0.693655	0.0104967	Down Regulated in ART
MRFAP1	NA	NA	NA	NA	NA	NA	0.369183	0.040853	Up Regulated in ART
MRPL16	NA	NA	NA	0.269362	0.0112577	Up Regulated in ART	0.428319	0.0102884	Up Regulated in ART
MRPL17	NA	NA	NA	NA	NA	NA	0.690071	0.00397746	Up Regulated in ART
MRPL3	NA	NA	NA	-0.233458	0.0156107	Down Regulated in ART	NA	NA	NA
MRPL30	NA	NA	NA	-0.458443	0.0115177	Down Regulated in ART	NA	NA	NA
MRPL33	NA	NA	NA	NA	NA	NA	0.814765	0.000731389	Up Regulated in ART
MRPL49	NA	NA	NA	NA	NA	NA	0.494004	0.000505099	Up Regulated in ART
MRPL58	NA	NA	NA	NA	NA	NA	0.543514	0.021397	Up Regulated in ART
MRPS10	NA	NA	NA	-0.288907	0.0484459	Down Regulated in ART	NA	NA	NA
MRPS15	NA	NA	NA	NA	NA	NA	0.439746	0.0353601	Up Regulated in ART
MRPS22	NA	NA	NA	NA	NA	NA	0.44724	0.0102884	Up Regulated in ART
MRPS23	NA	NA	NA	NA	NA	NA	0.593004	0.00561989	Up Regulated in ART
MRPS36	NA	NA	NA	NA	NA	NA	0.880254	8.50437e-05	Up Regulated in ART
MRPS7	NA	NA	NA	NA	NA	NA	0.453573	0.0228871	Up Regulated in ART
MSH5	NA	NA	NA	NA	NA	NA	-1.31277	0.0191722	Down Regulated in ART
MT1E	-2.64993	0.00670328	Down Regulated in VP	1.35413	0.0224844	Up Regulated in ART	NA	NA	NA
MT2A	-1.74057	0.0239653	Down Regulated in VP	0.900391	0.0474101	Up Regulated in ART	NA	NA	NA
MTA2	NA	NA	NA	0.194823	0.0217008	Up Regulated in ART	NA	NA	NA
MTATP6	NA	NA	NA	NA	NA	NA	0.89793	0.0292112	Up Regulated in ART
MTCO1	NA	NA	NA	0.664547	0.021087	Up Regulated in ART	0.940634	0.0072062	Up Regulated in ART
MTCO2	NA	NA	NA	NA	NA	NA	1.35988	2.7764e-05	Up Regulated in ART
MTCO3	NA	NA	NA	0.659954	0.0307114	Up Regulated in ART	1.36283	3.78548e-05	Up Regulated in ART
MTCYB	NA	NA	NA	NA	NA	NA	1.03872	0.015229	Up Regulated in ART
MTHFSD	NA	NA	NA	NA	NA	NA	-0.600644	0.0212373	Down Regulated in ART
MTND1	NA	NA	NA	NA	NA	NA	1.46282	8.02028e-05	Up Regulated in ART
MTND2	NA	NA	NA	NA	NA	NA	1.42986	3.78548e-05	Up Regulated in ART
MTND3	NA	NA	NA	NA	NA	NA	1.85194	1.07238e-06	Up Regulated in ART
MTND4	NA	NA	NA	NA	NA	NA	0.971764	0.00607942	Up Regulated in ART
MTND4L	NA	NA	NA	NA	NA	NA	1.0796	0.000328306	Up Regulated in ART
MTND5	NA	NA	NA	NA	NA	NA	1.1231	0.000815763	Up Regulated in ART
MTND6	NA	NA	NA	NA	NA	NA	1.48	0.00213257	Up Regulated in ART
MYB	NA	NA	NA	1.07134	0.00372814	Up Regulated in ART	1.21863	0.048817	Up Regulated in ART
MYBPC3	NA	NA	NA	0.750747	0.0478516	Up Regulated in ART	NA	NA	NA
MYCL	NA	NA	NA	-0.79963	0.0182143	Down Regulated in ART	NA	NA	NA
MYDGF	NA	NA	NA	NA	NA	NA	0.646579	0.0311877	Up Regulated in ART
MYH9	NA	NA	NA	NA	NA	NA	-0.579073	0.00377719	Down Regulated in ART
MYL12A	NA	NA	NA	NA	NA	NA	0.347756	0.0225662	Up Regulated in ART
MYL12B	NA	NA	NA	NA	NA	NA	0.530319	0.000470278	Up Regulated in ART
MYL5	NA	NA	NA	0.433362	0.0456057	Up Regulated in ART	NA	NA	NA
MYO19	NA	NA	NA	0.371843	0.0148488	Up Regulated in ART	NA	NA	NA
MYOM1	NA	NA	NA	NA	NA	NA	-1.02233	0.0361293	Down Regulated in ART
NAA40	NA	NA	NA	0.33733	0.0377026	Up Regulated in ART	NA	NA	NA
NAB2	NA	NA	NA	1.41009	0.00080058	Up Regulated in ART	1.53418	0.014555	Up Regulated in ART
NACA	NA	NA	NA	NA	NA	NA	0.463017	0.0236606	Up Regulated in ART
NACC2	NA	NA	NA	NA	NA	NA	-0.749148	0.0384995	Down Regulated in ART
NBDY	NA	NA	NA	NA	NA	NA	0.437162	0.0367329	Up Regulated in ART
NCEH1	NA	NA	NA	-0.623427	0.00766189	Down Regulated in ART	NA	NA	NA
NDUFA1	NA	NA	NA	NA	NA	NA	1.03827	9.82939e-06	Up Regulated in ART
NDUFA13	NA	NA	NA	1.0355	0.0116724	Up Regulated in ART	NA	NA	NA
NDUFA4	NA	NA	NA	NA	NA	NA	0.904818	9.29559e-07	Up Regulated in ART
NDUFA6	NA	NA	NA	NA	NA	NA	0.784096	0.000112569	Up Regulated in ART
NDUFAF8	NA	NA	NA	NA	NA	NA	1.04817	0.00127974	Up Regulated in ART
NDUFB1	NA	NA	NA	NA	NA	NA	1.60876	4.34672e-10	Up Regulated in ART
NDUFB4	NA	NA	NA	NA	NA	NA	0.426647	0.00308716	Up Regulated in ART
NDUFB5	NA	NA	NA	-0.321788	0.00496543	Down Regulated in ART	NA	NA	NA
NDUFS3	NA	NA	NA	0.352182	0.032718	Up Regulated in ART	0.475365	0.0112329	Up Regulated in ART
NDUFS4	NA	NA	NA	NA	NA	NA	0.606435	0.00616823	Up Regulated in ART
NDUFS5	NA	NA	NA	NA	NA	NA	0.911292	0.000945123	Up Regulated in ART
NEK4	NA	NA	NA	-0.347698	0.0159531	Down Regulated in ART	NA	NA	NA
NELFCD	NA	NA	NA	0.221914	0.0228389	Up Regulated in ART	NA	NA	NA
NENF	NA	NA	NA	NA	NA	NA	0.841082	0.00550051	Up Regulated in ART
NFYB	NA	NA	NA	-0.394736	0.00354198	Down Regulated in ART	NA	NA	NA
NHLRC3	NA	NA	NA	NA	NA	NA	-0.641067	0.0306886	Down Regulated in ART
NID2	NA	NA	NA	1.70462	0.00687818	Up Regulated in ART	NA	NA	NA
NIFK	NA	NA	NA	NA	NA	NA	0.618418	0.000473618	Up Regulated in ART
NLN	NA	NA	NA	-0.527242	0.0374983	Down Regulated in ART	NA	NA	NA
NLRC5	NA	NA	NA	0.395989	0.0411002	Up Regulated in ART	NA	NA	NA
NOD1	NA	NA	NA	0.240483	0.0489095	Up Regulated in ART	NA	NA	NA
NOL7	NA	NA	NA	NA	NA	NA	0.559433	0.00113328	Up Regulated in ART
NOMO3	NA	NA	NA	-1.03171	0.0497853	Down Regulated in ART	NA	NA	NA
NOP16	NA	NA	NA	0.443134	0.00823971	Up Regulated in ART	0.737281	0.0175299	Up Regulated in ART
NPAT	NA	NA	NA	-0.517717	0.0170715	Down Regulated in ART	NA	NA	NA
NPIPB4	NA	NA	NA	0.683985	0.020804	Up Regulated in ART	NA	NA	NA
NPIPB5	NA	NA	NA	0.587195	0.0393951	Up Regulated in ART	NA	NA	NA
NPM1	NA	NA	NA	NA	NA	NA	0.532489	0.0301597	Up Regulated in ART
NRBP1	NA	NA	NA	0.261145	0.0261148	Up Regulated in ART	NA	NA	NA
NT5M	NA	NA	NA	0.914699	0.0353671	Up Regulated in ART	NA	NA	NA
NTAN1	NA	NA	NA	0.372546	0.00613461	Up Regulated in ART	0.595141	0.00320902	Up Regulated in ART
NUP188	NA	NA	NA	NA	NA	NA	-0.352353	0.0141701	Down Regulated in ART
NUP85	NA	NA	NA	0.630391	4.584e-06	Up Regulated in ART	NA	NA	NA
NUP88	NA	NA	NA	NA	NA	NA	0.594344	0.000855649	Up Regulated in ART
NUTF2	NA	NA	NA	NA	NA	NA	0.505078	0.000335528	Up Regulated in ART
NXF1	NA	NA	NA	0.357511	0.012283	Up Regulated in ART	NA	NA	NA
NXT1	NA	NA	NA	NA	NA	NA	0.882273	0.0195181	Up Regulated in ART
NXT2	NA	NA	NA	-0.498802	0.0270798	Down Regulated in ART	NA	NA	NA
OCIAD2	NA	NA	NA	NA	NA	NA	0.689818	0.0323009	Up Regulated in ART
OCM	NA	NA	NA	NA	NA	NA	1.61466	0.0158298	Up Regulated in ART
ODF3B	-1.78936	0.0249973	Down Regulated in VP	1.00277	0.0474868	Up Regulated in ART	NA	NA	NA
OGFRL1	NA	NA	NA	-0.578935	0.0396357	Down Regulated in ART	-0.847736	0.0440125	Down Regulated in ART
OR4D6	NA	NA	NA	19.631	0.000608408	Up Regulated in ART	NA	NA	NA
ORC6	NA	NA	NA	0.631291	0.0377884	Up Regulated in ART	NA	NA	NA
OST4	NA	NA	NA	NA	NA	NA	1.06864	8.02028e-05	Up Regulated in ART
OSTF1	NA	NA	NA	-0.306284	0.0467818	Down Regulated in ART	NA	NA	NA
OSTM1	NA	NA	NA	-0.657167	0.000248704	Down Regulated in ART	-0.892401	0.000473618	Down Regulated in ART
OXA1L	NA	NA	NA	0.250429	0.0196655	Up Regulated in ART	0.443672	0.00110912	Up Regulated in ART
OXNAD1	NA	NA	NA	NA	NA	NA	0.946928	0.0117424	Up Regulated in ART
P2RY10	NA	NA	NA	NA	NA	NA	0.936494	0.00550051	Up Regulated in ART
P2RY6	NA	NA	NA	NA	NA	NA	-1.56516	0.0244787	Down Regulated in ART
PACSIN3	NA	NA	NA	NA	NA	NA	-4.51268	0.0168786	Down Regulated in ART
PAIP2	NA	NA	NA	NA	NA	NA	0.562735	2.51528e-05	Up Regulated in ART
PALLD	NA	NA	NA	-0.758329	0.0279887	Down Regulated in ART	NA	NA	NA
PAPSS2	NA	NA	NA	NA	NA	NA	-1.07382	0.0419573	Down Regulated in ART
PAQR6	NA	NA	NA	0.704978	0.017045	Up Regulated in ART	NA	NA	NA
PARK7	NA	NA	NA	NA	NA	NA	0.388521	0.0109928	Up Regulated in ART
PARP12	NA	NA	NA	0.419476	0.0285874	Up Regulated in ART	NA	NA	NA
PATL2	NA	NA	NA	0.800351	0.0230247	Up Regulated in ART	NA	NA	NA
PCBP2	NA	NA	NA	NA	NA	NA	0.369656	0.0180067	Up Regulated in ART
PCDH12	NA	NA	NA	-1.43871	0.00119421	Down Regulated in ART	NA	NA	NA
PCGF1	NA	NA	NA	NA	NA	NA	0.565483	0.014936	Up Regulated in ART
PCIF1	NA	NA	NA	0.275398	0.0290168	Up Regulated in ART	0.47721	0.00122605	Up Regulated in ART
PCNT	NA	NA	NA	NA	NA	NA	-0.61575	0.00701711	Down Regulated in ART
PCSK7	NA	NA	NA	0.343651	0.0103236	Up Regulated in ART	NA	NA	NA
PDCD2	NA	NA	NA	NA	NA	NA	0.444379	0.00550051	Up Regulated in ART
PDCD6	NA	NA	NA	NA	NA	NA	-0.609557	0.0108359	Down Regulated in ART
PDCD6IP	NA	NA	NA	NA	NA	NA	-0.560674	0.0316992	Down Regulated in ART
PDE1B	NA	NA	NA	0.783877	0.00187558	Up Regulated in ART	NA	NA	NA
PDGFRA	NA	NA	NA	1.79574	0.0241841	Up Regulated in ART	NA	NA	NA
PDRG1	NA	NA	NA	NA	NA	NA	0.615147	0.00193186	Up Regulated in ART
PDS5A	0.453366	0.0390846	Up Regulated in VP	NA	NA	NA	NA	NA	NA
PEG3	NA	NA	NA	NA	NA	NA	-3.88214	0.0379028	Down Regulated in ART
PEX7	NA	NA	NA	NA	NA	NA	0.749482	0.0101209	Up Regulated in ART
PFDN1	NA	NA	NA	NA	NA	NA	0.383169	0.0419573	Up Regulated in ART
PFDN4	NA	NA	NA	NA	NA	NA	0.760371	0.00169308	Up Regulated in ART
PGBD4	NA	NA	NA	NA	NA	NA	0.915159	0.0171688	Up Regulated in ART
PHF5A	NA	NA	NA	NA	NA	NA	1.06389	0.000245672	Up Regulated in ART
PI4K2A	NA	NA	NA	0.758402	0.0147774	Up Regulated in ART	1.08323	0.0133212	Up Regulated in ART
PI4KA	NA	NA	NA	NA	NA	NA	-0.360634	0.0352339	Down Regulated in ART
PIBF1	NA	NA	NA	NA	NA	NA	0.666287	0.00332267	Up Regulated in ART
PIF1	NA	NA	NA	0.933917	0.0173394	Up Regulated in ART	NA	NA	NA
PIGC	NA	NA	NA	NA	NA	NA	0.838366	5.15285e-08	Up Regulated in ART
PIM2	NA	NA	NA	NA	NA	NA	0.832901	0.00389169	Up Regulated in ART
PKP4	NA	NA	NA	-0.325161	0.0377026	Down Regulated in ART	NA	NA	NA
PLA2G15	NA	NA	NA	0.490423	0.0288596	Up Regulated in ART	NA	NA	NA
PLA2G7	NA	NA	NA	-1.17853	0.000560381	Down Regulated in ART	NA	NA	NA
PLCB1	NA	NA	NA	-0.997507	0.00153645	Down Regulated in ART	NA	NA	NA
PLCB2	NA	NA	NA	NA	NA	NA	-0.455122	0.047856	Down Regulated in ART
PLCXD1	NA	NA	NA	0.762743	0.000199036	Up Regulated in ART	NA	NA	NA
PLD6	NA	NA	NA	NA	NA	NA	1.52305	0.00191061	Up Regulated in ART
PLK1	-1.95339	0.0125428	Down Regulated in VP	NA	NA	NA	NA	NA	NA
PLPP6	NA	NA	NA	NA	NA	NA	0.999233	0.0046202	Up Regulated in ART
PML	NA	NA	NA	0.475362	0.034408	Up Regulated in ART	NA	NA	NA
PMS1	NA	NA	NA	NA	NA	NA	-0.557954	0.0331494	Down Regulated in ART
PNRC1	NA	NA	NA	-0.334731	0.0350534	Down Regulated in ART	NA	NA	NA
PNRC2	NA	NA	NA	NA	NA	NA	0.478259	0.021169	Up Regulated in ART
POLE3	NA	NA	NA	NA	NA	NA	0.423178	0.00503346	Up Regulated in ART
POLR2C	NA	NA	NA	NA	NA	NA	0.43538	0.00483938	Up Regulated in ART
POLR2G	NA	NA	NA	NA	NA	NA	0.293081	0.045276	Up Regulated in ART
POT1	NA	NA	NA	-0.497801	0.00400041	Down Regulated in ART	NA	NA	NA
POU2F3	NA	NA	NA	NA	NA	NA	-4.33239	0.0245116	Down Regulated in ART
PPARGC1A	NA	NA	NA	-1.94375	0.0419081	Down Regulated in ART	-3.67461	0.0364738	Down Regulated in ART
PPIA	NA	NA	NA	NA	NA	NA	0.686856	7.87209e-06	Up Regulated in ART
PPIB	NA	NA	NA	NA	NA	NA	0.521551	0.0404201	Up Regulated in ART
PPIH	NA	NA	NA	NA	NA	NA	1.0172	8.44648e-07	Up Regulated in ART
PPP1R2	0.643868	0.0205381	Up Regulated in VP	NA	NA	NA	NA	NA	NA
PPP2CB	NA	NA	NA	-0.428734	0.00452195	Down Regulated in ART	NA	NA	NA
PPRC1	NA	NA	NA	0.379012	0.0446975	Up Regulated in ART	NA	NA	NA
PRELID1	NA	NA	NA	NA	NA	NA	0.594115	0.0437923	Up Regulated in ART
PREPL	NA	NA	NA	-0.700511	0.00667678	Down Regulated in ART	-0.825445	0.0405215	Down Regulated in ART
PRKAR2A	0.554683	0.0358637	Up Regulated in VP	NA	NA	NA	NA	NA	NA
PRKCI	NA	NA	NA	-0.577031	0.00775415	Down Regulated in ART	NA	NA	NA
PRKG2	NA	NA	NA	-1.36672	0.0184882	Down Regulated in ART	NA	NA	NA
PROM1	NA	NA	NA	1.50151	0.0286731	Up Regulated in ART	NA	NA	NA
PRPF18	NA	NA	NA	-0.400023	0.0151638	Down Regulated in ART	NA	NA	NA
PRPS1	NA	NA	NA	NA	NA	NA	0.497973	0.00290638	Up Regulated in ART
PRR3	NA	NA	NA	NA	NA	NA	0.455698	0.0222698	Up Regulated in ART
PRSS53	NA	NA	NA	0.667442	0.00513646	Up Regulated in ART	NA	NA	NA
PSMA7	NA	NA	NA	NA	NA	NA	0.417187	0.0112395	Up Regulated in ART
PSMB1	NA	NA	NA	NA	NA	NA	0.751239	6.09266e-06	Up Regulated in ART
PSMB4	NA	NA	NA	0.301961	0.0497853	Up Regulated in ART	0.51916	0.000191931	Up Regulated in ART
PSMB6	NA	NA	NA	NA	NA	NA	0.46786	0.021397	Up Regulated in ART
PSMB7	NA	NA	NA	NA	NA	NA	0.512947	0.0116968	Up Regulated in ART
PSME1	NA	NA	NA	NA	NA	NA	0.385251	0.0219267	Up Regulated in ART
PSPC1	NA	NA	NA	NA	NA	NA	0.564288	2.12232e-05	Up Regulated in ART
PTCRA	NA	NA	NA	0.860422	0.0317442	Up Regulated in ART	NA	NA	NA
PTDSS1	NA	NA	NA	-0.18107	0.0198026	Down Regulated in ART	NA	NA	NA
PTGER4	NA	NA	NA	-0.595169	0.0307215	Down Regulated in ART	NA	NA	NA
PTGFR	NA	NA	NA	NA	NA	NA	-5.20902	0.0236634	Down Regulated in ART
PTGIR	NA	NA	NA	0.738863	0.0159531	Up Regulated in ART	NA	NA	NA
PTPN9	NA	NA	NA	-0.26279	0.0399961	Down Regulated in ART	NA	NA	NA
PTPRS	NA	NA	NA	-1.25953	3.17867e-05	Down Regulated in ART	-1.51617	0.0021878	Down Regulated in ART
PTS	NA	NA	NA	NA	NA	NA	0.694102	0.0466637	Up Regulated in ART
R3HDM1	0.32998	0.0321492	Up Regulated in VP	NA	NA	NA	NA	NA	NA
RAB23	NA	NA	NA	NA	NA	NA	-1.31814	0.0391255	Down Regulated in ART
RAB24	NA	NA	NA	0.632973	0.0450973	Up Regulated in ART	-0.950807	0.018618	Down Regulated in ART
RAB33B	NA	NA	NA	-0.447156	0.0131829	Down Regulated in ART	NA	NA	NA
RAB34	NA	NA	NA	0.602894	0.0302018	Up Regulated in ART	NA	NA	NA
RAB39B	NA	NA	NA	NA	NA	NA	0.689696	0.0358106	Up Regulated in ART
RAB43	NA	NA	NA	NA	NA	NA	-1.41763	0.0463441	Down Regulated in ART
RAB5C	NA	NA	NA	0.332469	0.042908	Up Regulated in ART	NA	NA	NA
RAB5IF	NA	NA	NA	0.608071	0.0313159	Up Regulated in ART	-0.839569	0.021102	Down Regulated in ART
RANBP6	NA	NA	NA	NA	NA	NA	0.684954	0.0214755	Up Regulated in ART
RAP1A	NA	NA	NA	-0.236178	0.0422815	Down Regulated in ART	NA	NA	NA
RARA	NA	NA	NA	NA	NA	NA	-0.8746	0.00452414	Down Regulated in ART
RARS2	NA	NA	NA	NA	NA	NA	0.334639	0.044687	Up Regulated in ART
RBBP9	NA	NA	NA	-0.522349	0.020804	Down Regulated in ART	NA	NA	NA
RBM14	NA	NA	NA	NA	NA	NA	-0.667304	0.00500807	Down Regulated in ART
RBM5	NA	NA	NA	0.317457	0.00699143	Up Regulated in ART	NA	NA	NA
RBX1	NA	NA	NA	NA	NA	NA	0.641384	0.00352253	Up Regulated in ART
RCC2	NA	NA	NA	0.258432	0.0407084	Up Regulated in ART	NA	NA	NA
RCCD1	NA	NA	NA	0.667517	0.0174533	Up Regulated in ART	NA	NA	NA
RCL1	NA	NA	NA	NA	NA	NA	0.881692	0.00332705	Up Regulated in ART
RCOR3	NA	NA	NA	NA	NA	NA	-0.508277	0.015229	Down Regulated in ART
RDH5	NA	NA	NA	0.924515	0.00503356	Up Regulated in ART	NA	NA	NA
REC8	NA	NA	NA	0.983104	9.59453e-05	Up Regulated in ART	NA	NA	NA
RFLNB	NA	NA	NA	-0.48561	0.0255831	Down Regulated in ART	NA	NA	NA
RGS10	NA	NA	NA	NA	NA	NA	0.575262	0.0319741	Up Regulated in ART
RHNO1	NA	NA	NA	NA	NA	NA	0.577511	0.00191428	Up Regulated in ART
RHOH	NA	NA	NA	NA	NA	NA	0.922042	0.0118254	Up Regulated in ART
RHOT1	NA	NA	NA	-0.397691	0.0159531	Down Regulated in ART	NA	NA	NA
RIMBP2	NA	NA	NA	4.40527	0.0482324	Up Regulated in ART	NA	NA	NA
RIOX1	NA	NA	NA	NA	NA	NA	0.773285	0.00852471	Up Regulated in ART
RIOX2	NA	NA	NA	-0.367034	0.0267536	Down Regulated in ART	NA	NA	NA
RNASE1	NA	NA	NA	1.37907	0.0294134	Up Regulated in ART	NA	NA	NA
RNASET2	NA	NA	NA	0.488328	0.0072033	Up Regulated in ART	NA	NA	NA
RNF112	NA	NA	NA	1.24377	0.0062433	Up Regulated in ART	NA	NA	NA
RNF121	NA	NA	NA	NA	NA	NA	0.36803	0.0408219	Up Regulated in ART
RNF13	NA	NA	NA	-0.407255	0.0183492	Down Regulated in ART	NA	NA	NA
RNF152	NA	NA	NA	1.74312	0.0474868	Up Regulated in ART	NA	NA	NA
RNF175	NA	NA	NA	1.15828	0.0155646	Up Regulated in ART	NA	NA	NA
RNF181	NA	NA	NA	NA	NA	NA	0.614309	0.00668113	Up Regulated in ART
RNF2	NA	NA	NA	-0.448938	0.00610776	Down Regulated in ART	NA	NA	NA
RNF41	NA	NA	NA	-0.297555	0.0145692	Down Regulated in ART	NA	NA	NA
RNF43	NA	NA	NA	0.764591	0.0247504	Up Regulated in ART	NA	NA	NA
RNF7	NA	NA	NA	NA	NA	NA	0.533745	0.0460604	Up Regulated in ART
RPF1	NA	NA	NA	NA	NA	NA	0.839138	0.000388711	Up Regulated in ART
RPL22L1	NA	NA	NA	NA	NA	NA	0.721041	0.00318506	Up Regulated in ART
RPL36AL	NA	NA	NA	NA	NA	NA	1.13586	1.87e-07	Up Regulated in ART
RPP38	NA	NA	NA	NA	NA	NA	0.99883	0.000121225	Up Regulated in ART
RPRD2	NA	NA	NA	-0.31685	0.0237815	Down Regulated in ART	NA	NA	NA
RPS6KA3	0.603129	0.0380965	Up Regulated in VP	-0.448634	0.0201306	Down Regulated in ART	NA	NA	NA
RRAS	-1.41238	0.0124132	Down Regulated in VP	0.67762	0.0262776	Up Regulated in ART	NA	NA	NA
RRP12	NA	NA	NA	0.747085	0.00766189	Up Regulated in ART	NA	NA	NA
RRP8	NA	NA	NA	NA	NA	NA	0.471755	0.0112329	Up Regulated in ART
RSPH3	NA	NA	NA	-0.570549	0.0117354	Down Regulated in ART	NA	NA	NA
RTBDN	NA	NA	NA	18.7535	0.00114745	Up Regulated in ART	NA	NA	NA
RTRAF	NA	NA	NA	NA	NA	NA	0.669135	2.03272e-06	Up Regulated in ART
RUFY4	NA	NA	NA	1.05774	0.0366542	Up Regulated in ART	NA	NA	NA
S100A10	NA	NA	NA	NA	NA	NA	0.62945	0.0453788	Up Regulated in ART
S100A4	NA	NA	NA	NA	NA	NA	0.568135	0.0352241	Up Regulated in ART
SAP18	NA	NA	NA	NA	NA	NA	0.449026	0.0218806	Up Regulated in ART
SAP30BP	NA	NA	NA	0.389865	0.00119421	Up Regulated in ART	NA	NA	NA
SCARB1	NA	NA	NA	NA	NA	NA	-0.893703	0.00318506	Down Regulated in ART
SCLY	NA	NA	NA	0.650797	0.0351419	Up Regulated in ART	NA	NA	NA
SCO2	NA	NA	NA	NA	NA	NA	-2.97921	0.0196623	Down Regulated in ART
SDHA	NA	NA	NA	0.434499	0.00178235	Up Regulated in ART	NA	NA	NA
SDHAF2	-0.631038	0.0452186	Down Regulated in VP	NA	NA	NA	NA	NA	NA
SEC16A	NA	NA	NA	NA	NA	NA	-0.504365	0.000779646	Down Regulated in ART
SEC61G	NA	NA	NA	NA	NA	NA	0.794565	0.00016633	Up Regulated in ART
SEC63	0.461118	0.0413354	Up Regulated in VP	NA	NA	NA	NA	NA	NA
SELENBP1	NA	NA	NA	3.70907	0.00246139	Up Regulated in ART	NA	NA	NA
SELENOK	NA	NA	NA	NA	NA	NA	0.969898	0.0200865	Up Regulated in ART
SENP8	NA	NA	NA	-1.03789	0.0409088	Down Regulated in ART	NA	NA	NA
SEPT10	NA	NA	NA	-0.769844	0.0285874	Down Regulated in ART	NA	NA	NA
SERF1A	-15.6131	2.33284e-08	Down Regulated in VP	NA	NA	NA	NA	NA	NA
SERINC4	NA	NA	NA	-2.72006	0.0411002	Down Regulated in ART	NA	NA	NA
SETMAR	NA	NA	NA	NA	NA	NA	0.730732	0.00792912	Up Regulated in ART
SF3B2	NA	NA	NA	0.15167	0.0414648	Up Regulated in ART	NA	NA	NA
SF3B6	NA	NA	NA	NA	NA	NA	0.500099	0.0228871	Up Regulated in ART
SFT2D3	NA	NA	NA	NA	NA	NA	0.599195	0.0282374	Up Regulated in ART
SFXN3	NA	NA	NA	0.289246	0.0409088	Up Regulated in ART	NA	NA	NA
SH2B2	NA	NA	NA	0.708444	0.0241711	Up Regulated in ART	NA	NA	NA
SHANK3	NA	NA	NA	1.98755	0.0414648	Up Regulated in ART	NA	NA	NA
SHC1	NA	NA	NA	NA	NA	NA	-0.301436	0.0279515	Down Regulated in ART
SHLD1	NA	NA	NA	NA	NA	NA	0.806884	0.00729592	Up Regulated in ART
SHLD3	NA	NA	NA	NA	NA	NA	1.04342	0.0234362	Up Regulated in ART
SLAIN2	NA	NA	NA	-0.33752	0.0145755	Down Regulated in ART	NA	NA	NA
SLC17A9	NA	NA	NA	0.654488	0.0355711	Up Regulated in ART	NA	NA	NA
SLC25A24	NA	NA	NA	-0.663463	0.00248916	Down Regulated in ART	NA	NA	NA
SLC25A26	NA	NA	NA	NA	NA	NA	0.611672	0.00103699	Up Regulated in ART
SLC25A33	NA	NA	NA	NA	NA	NA	0.916489	0.00442542	Up Regulated in ART
SLC25A37	NA	NA	NA	0.41852	0.0222656	Up Regulated in ART	NA	NA	NA
SLC25A40	NA	NA	NA	-0.645554	0.00540015	Down Regulated in ART	-0.875001	0.0209946	Down Regulated in ART
SLC25A46	NA	NA	NA	-0.437693	0.0442896	Down Regulated in ART	NA	NA	NA
SLC26A6	-0.667758	0.0152156	Down Regulated in VP	NA	NA	NA	NA	NA	NA
SLC2A6	-1.23097	0.0309342	Down Regulated in VP	NA	NA	NA	NA	NA	NA
SLC30A5	NA	NA	NA	-0.392057	0.0484459	Down Regulated in ART	NA	NA	NA
SLC30A7	NA	NA	NA	NA	NA	NA	-0.62224	0.0351042	Down Regulated in ART
SLC33A1	NA	NA	NA	NA	NA	NA	-0.911195	0.038597	Down Regulated in ART
SLC35A3	NA	NA	NA	NA	NA	NA	-0.914791	0.00492	Down Regulated in ART
SLC35B1	NA	NA	NA	0.284996	0.0453915	Up Regulated in ART	0.395896	0.0165285	Up Regulated in ART
SLC35B2	-0.52487	0.0462632	Down Regulated in VP	NA	NA	NA	NA	NA	NA
SLC35E2A	NA	NA	NA	-0.99832	0.0261148	Down Regulated in ART	NA	NA	NA
SLC35F5	NA	NA	NA	NA	NA	NA	-0.810879	0.00213257	Down Regulated in ART
SLC36A4	NA	NA	NA	-0.458407	0.0307215	Down Regulated in ART	NA	NA	NA
SLC37A2	NA	NA	NA	NA	NA	NA	-0.941154	0.0202451	Down Regulated in ART
SLC39A8	NA	NA	NA	-0.450604	0.0236804	Down Regulated in ART	NA	NA	NA
SLC45A4	NA	NA	NA	NA	NA	NA	-0.771852	0.00492	Down Regulated in ART
SLC4A1	NA	NA	NA	4.8789	0.000796951	Up Regulated in ART	3.73266	0.0365403	Up Regulated in ART
SLC4A7	NA	NA	NA	NA	NA	NA	-0.917763	0.00487782	Down Regulated in ART
SLC6A8	NA	NA	NA	1.15461	0.0223681	Up Regulated in ART	NA	NA	NA
SLC9A3	NA	NA	NA	NA	NA	NA	-2.46429	0.0176307	Down Regulated in ART
SLCO4A1	NA	NA	NA	1.07857	0.0445255	Up Regulated in ART	NA	NA	NA
SLFN12	NA	NA	NA	NA	NA	NA	-0.622356	0.0283611	Down Regulated in ART
SLIRP	NA	NA	NA	NA	NA	NA	1.04634	1.02964e-05	Up Regulated in ART
SLX4	NA	NA	NA	NA	NA	NA	-0.809654	0.00462235	Down Regulated in ART
SMG1	NA	NA	NA	NA	NA	NA	-0.838259	0.00442542	Down Regulated in ART
SMIM12	NA	NA	NA	NA	NA	NA	0.648225	3.7544e-08	Up Regulated in ART
SMIM14	NA	NA	NA	-0.645206	0.00482299	Down Regulated in ART	NA	NA	NA
SMIM19	NA	NA	NA	-0.286107	0.0411002	Down Regulated in ART	NA	NA	NA
SMIM2	NA	NA	NA	17.1973	0.00347185	Up Regulated in ART	NA	NA	NA
SMIM26	NA	NA	NA	NA	NA	NA	0.865446	0.00016633	Up Regulated in ART
SMIM6	NA	NA	NA	-1.89049	0.0288596	Down Regulated in ART	NA	NA	NA
SMOX	NA	NA	NA	0.983	0.0261148	Up Regulated in ART	NA	NA	NA
SNAI3	NA	NA	NA	0.963126	0.00206021	Up Regulated in ART	NA	NA	NA
SNAPC5	NA	NA	NA	NA	NA	NA	0.388844	0.04146	Up Regulated in ART
SNRNP25	-0.854813	0.0210806	Down Regulated in VP	NA	NA	NA	NA	NA	NA
SNRNP35	NA	NA	NA	NA	NA	NA	0.648888	0.000267256	Up Regulated in ART
SNRPD1	NA	NA	NA	NA	NA	NA	0.793511	0.000779646	Up Regulated in ART
SNRPD3	NA	NA	NA	-0.333022	0.0131735	Down Regulated in ART	NA	NA	NA
SNRPE	NA	NA	NA	NA	NA	NA	0.812287	3.40352e-07	Up Regulated in ART
SNRPF	NA	NA	NA	NA	NA	NA	0.773916	4.65064e-05	Up Regulated in ART
SNU13	NA	NA	NA	NA	NA	NA	0.372788	0.0160087	Up Regulated in ART
SNX10	NA	NA	NA	NA	NA	NA	-0.810349	0.0367329	Down Regulated in ART
SNX33	NA	NA	NA	NA	NA	NA	-0.731051	0.0150047	Down Regulated in ART
SNX7	NA	NA	NA	2.11648	0.0246622	Up Regulated in ART	NA	NA	NA
SOD1	NA	NA	NA	NA	NA	NA	0.540676	0.0263641	Up Regulated in ART
SORD	NA	NA	NA	-0.621396	0.000494383	Down Regulated in ART	NA	NA	NA
SOS1	NA	NA	NA	NA	NA	NA	-0.800264	0.000694384	Down Regulated in ART
SPAG17	NA	NA	NA	-1.49445	0.0302018	Down Regulated in ART	NA	NA	NA
SPAST	NA	NA	NA	-0.615665	0.00101018	Down Regulated in ART	-0.688795	0.0140004	Down Regulated in ART
SPATA22	NA	NA	NA	-4.11514	0.00382233	Down Regulated in ART	NA	NA	NA
SPHK1	-1.4104	0.0401192	Down Regulated in VP	NA	NA	NA	NA	NA	NA
SPIN1	NA	NA	NA	-0.364918	0.0360201	Down Regulated in ART	NA	NA	NA
SPRYD4	NA	NA	NA	NA	NA	NA	0.763958	0.00163151	Up Regulated in ART
SPTSSA	NA	NA	NA	-0.544658	0.0257137	Down Regulated in ART	-0.976911	0.00492	Down Regulated in ART
SRCAP	NA	NA	NA	NA	NA	NA	-0.942513	0.0331858	Down Regulated in ART
SRP14	NA	NA	NA	NA	NA	NA	0.770362	3.11455e-05	Up Regulated in ART
SRP9	NA	NA	NA	-0.361537	0.0367168	Down Regulated in ART	NA	NA	NA
SRSF3	NA	NA	NA	NA	NA	NA	0.548626	0.00744855	Up Regulated in ART
SS18L1	NA	NA	NA	NA	NA	NA	-0.568536	0.00381603	Down Regulated in ART
SSBP1	NA	NA	NA	NA	NA	NA	0.408363	0.00142897	Up Regulated in ART
SSR2	NA	NA	NA	NA	NA	NA	0.640319	0.00100055	Up Regulated in ART
ST6GALNAC3	NA	NA	NA	-0.876806	0.031992	Down Regulated in ART	NA	NA	NA
STARD3NL	NA	NA	NA	-0.324364	0.0320187	Down Regulated in ART	NA	NA	NA
STARD5	NA	NA	NA	0.704495	0.00114745	Up Regulated in ART	NA	NA	NA
STIMATE	NA	NA	NA	NA	NA	NA	-0.905656	0.0235196	Down Regulated in ART
STK26	NA	NA	NA	-0.433074	0.0499106	Down Regulated in ART	-0.736811	0.0193771	Down Regulated in ART
STK35	NA	NA	NA	0.358047	0.00271826	Up Regulated in ART	0.391657	0.0234362	Up Regulated in ART
STK36	NA	NA	NA	NA	NA	NA	-0.470071	0.0129653	Down Regulated in ART
STRIP1	NA	NA	NA	0.251811	0.0122808	Up Regulated in ART	NA	NA	NA
STX16NPEPL1	NA	NA	NA	NA	NA	NA	-0.803849	0.0492169	Down Regulated in ART
STX1A	NA	NA	NA	0.738491	0.0095345	Up Regulated in ART	NA	NA	NA
STX6	NA	NA	NA	NA	NA	NA	-0.507074	0.0351042	Down Regulated in ART
STXBP3	NA	NA	NA	-0.368782	0.0478263	Down Regulated in ART	NA	NA	NA
SUCLG2	NA	NA	NA	-0.329588	0.0286731	Down Regulated in ART	NA	NA	NA
SUGP2	NA	NA	NA	0.451415	0.00430977	Up Regulated in ART	NA	NA	NA
SULT1B1	NA	NA	NA	-0.686999	0.0157363	Down Regulated in ART	NA	NA	NA
SUMO3	NA	NA	NA	NA	NA	NA	0.537028	0.00561989	Up Regulated in ART
SUPT3H	NA	NA	NA	NA	NA	NA	1.01335	0.00096879	Up Regulated in ART
SUPT5H	NA	NA	NA	0.256748	0.0365275	Up Regulated in ART	NA	NA	NA
SURF1	NA	NA	NA	NA	NA	NA	0.56873	0.0188989	Up Regulated in ART
SUZ12	NA	NA	NA	-0.40609	0.0317442	Down Regulated in ART	NA	NA	NA
SVBP	NA	NA	NA	NA	NA	NA	0.820216	0.000493193	Up Regulated in ART
SYDE2	NA	NA	NA	NA	NA	NA	1.73456	0.00834889	Up Regulated in ART
SYF2	NA	NA	NA	NA	NA	NA	0.566688	0.00556604	Up Regulated in ART
SYS1	NA	NA	NA	NA	NA	NA	0.598097	0.0454888	Up Regulated in ART
TAF4	NA	NA	NA	NA	NA	NA	-0.519471	0.0166572	Down Regulated in ART
TAF4B	NA	NA	NA	NA	NA	NA	0.790364	0.0371262	Up Regulated in ART
TAF7	NA	NA	NA	NA	NA	NA	0.471131	0.0230786	Up Regulated in ART
TAF8	NA	NA	NA	NA	NA	NA	0.398224	0.0471928	Up Regulated in ART
TAGAP	NA	NA	NA	-0.455679	0.0378476	Down Regulated in ART	NA	NA	NA
TANGO6	NA	NA	NA	NA	NA	NA	0.543557	0.0139307	Up Regulated in ART
TATDN1	NA	NA	NA	NA	NA	NA	0.516178	0.0297253	Up Regulated in ART
TBC1D24	NA	NA	NA	NA	NA	NA	-0.789623	0.00482965	Down Regulated in ART
TBCA	NA	NA	NA	NA	NA	NA	0.595297	0.0104967	Up Regulated in ART
TBCCD1	NA	NA	NA	-0.408472	0.0021529	Down Regulated in ART	NA	NA	NA
TBL1XR1	NA	NA	NA	NA	NA	NA	-0.666783	0.0233736	Down Regulated in ART
TBP	NA	NA	NA	0.273679	0.00749705	Up Regulated in ART	NA	NA	NA
TCEA1	0.537721	0.031642	Up Regulated in VP	-0.359956	0.0257137	Down Regulated in ART	NA	NA	NA
TCHP	NA	NA	NA	NA	NA	NA	-0.518484	0.00282969	Down Regulated in ART
TECPR2	NA	NA	NA	-0.343363	0.00932225	Down Regulated in ART	NA	NA	NA
TFIP11	NA	NA	NA	0.404158	0.00502326	Up Regulated in ART	NA	NA	NA
TGFA	NA	NA	NA	-0.845893	0.00931532	Down Regulated in ART	NA	NA	NA
THEM5	NA	NA	NA	1.18362	0.0188308	Up Regulated in ART	NA	NA	NA
TIFAB	NA	NA	NA	-1.05311	0.0222555	Down Regulated in ART	-1.42613	0.0282374	Down Regulated in ART
TIGD1	NA	NA	NA	NA	NA	NA	0.904039	0.00938044	Up Regulated in ART
TIGD6	NA	NA	NA	NA	NA	NA	1.22206	0.00136419	Up Regulated in ART
TIMM10B	NA	NA	NA	NA	NA	NA	0.816969	0.00429767	Up Regulated in ART
TIMM22	NA	NA	NA	NA	NA	NA	0.397734	0.048817	Up Regulated in ART
TIMM9	NA	NA	NA	NA	NA	NA	0.55634	0.0253306	Up Regulated in ART
TK1	-1.66287	0.0418296	Down Regulated in VP	NA	NA	NA	NA	NA	NA
TM7SF3	NA	NA	NA	-0.319959	0.00687818	Down Regulated in ART	NA	NA	NA
TMBIM1	NA	NA	NA	NA	NA	NA	0.449231	0.0199232	Up Regulated in ART
TMED3	NA	NA	NA	NA	NA	NA	0.523187	0.0331921	Up Regulated in ART
TMEM116	NA	NA	NA	NA	NA	NA	0.572433	0.0480115	Up Regulated in ART
TMEM126A	NA	NA	NA	NA	NA	NA	0.645577	0.00388428	Up Regulated in ART
TMEM128	NA	NA	NA	-0.438605	0.00288388	Down Regulated in ART	NA	NA	NA
TMEM132A	NA	NA	NA	-2.96944	0.0349856	Down Regulated in ART	NA	NA	NA
TMEM147	NA	NA	NA	NA	NA	NA	0.54067	0.0297253	Up Regulated in ART
TMEM151B	-15.2247	0.00985767	Down Regulated in VP	NA	NA	NA	NA	NA	NA
TMEM158	NA	NA	NA	1.36062	0.0269355	Up Regulated in ART	NA	NA	NA
TMEM179B	NA	NA	NA	NA	NA	NA	0.714258	0.000473618	Up Regulated in ART
TMEM181	NA	NA	NA	NA	NA	NA	-0.995021	0.00794959	Down Regulated in ART
TMEM182	NA	NA	NA	-0.728795	0.000181192	Down Regulated in ART	NA	NA	NA
TMEM19	NA	NA	NA	-0.431354	0.0409088	Down Regulated in ART	NA	NA	NA
TMEM200A	NA	NA	NA	-1.03205	0.0285874	Down Regulated in ART	NA	NA	NA
TMEM209	NA	NA	NA	-0.560714	0.00449166	Down Regulated in ART	NA	NA	NA
TMEM254	NA	NA	NA	-0.304929	0.0422815	Down Regulated in ART	NA	NA	NA
TMEM256	NA	NA	NA	NA	NA	NA	0.767149	0.0277429	Up Regulated in ART
TMEM258	NA	NA	NA	NA	NA	NA	0.841415	8.50437e-05	Up Regulated in ART
TMEM38B	NA	NA	NA	-0.415099	0.0144252	Down Regulated in ART	NA	NA	NA
TMEM40	NA	NA	NA	0.953268	0.0452827	Up Regulated in ART	NA	NA	NA
TMEM53	NA	NA	NA	-0.679331	0.0229118	Down Regulated in ART	NA	NA	NA
TMEM56RWDD3	NA	NA	NA	NA	NA	NA	-2.40824	0.0294418	Down Regulated in ART
TMEM59	NA	NA	NA	NA	NA	NA	0.462581	0.00318506	Up Regulated in ART
TMEM62	NA	NA	NA	0.304524	0.0349117	Up Regulated in ART	NA	NA	NA
TMEM65	NA	NA	NA	-0.353713	0.0422815	Down Regulated in ART	NA	NA	NA
TMSB10	NA	NA	NA	NA	NA	NA	0.775475	0.00177701	Up Regulated in ART
TMSB4X	NA	NA	NA	NA	NA	NA	0.610723	0.000114384	Up Regulated in ART
TMX3	NA	NA	NA	NA	NA	NA	-0.787727	0.00264904	Down Regulated in ART
TNFRSF12A	NA	NA	NA	2.28972	0.000936031	Up Regulated in ART	2.34163	0.045076	Up Regulated in ART
TOE1	NA	NA	NA	NA	NA	NA	1.05994	0.00744855	Up Regulated in ART
TOMM22	NA	NA	NA	NA	NA	NA	0.545084	0.00100055	Up Regulated in ART
TOMM40L	NA	NA	NA	0.438967	0.0337604	Up Regulated in ART	NA	NA	NA
TP73	-2.29122	0.0448357	Down Regulated in VP	NA	NA	NA	NA	NA	NA
TRAF3IP1	0.516588	0.0319219	Up Regulated in VP	NA	NA	NA	NA	NA	NA
TRAPPC2L	NA	NA	NA	NA	NA	NA	0.655123	0.00397746	Up Regulated in ART
TRAPPC4	NA	NA	NA	NA	NA	NA	0.65062	0.00105936	Up Regulated in ART
TREML4	NA	NA	NA	NA	NA	NA	-7.30316	0.0464067	Down Regulated in ART
TRIAP1	NA	NA	NA	NA	NA	NA	0.79513	0.000612758	Up Regulated in ART
TRIM11	NA	NA	NA	0.535163	0.00483707	Up Regulated in ART	NA	NA	NA
TRIM26	NA	NA	NA	0.305016	0.00195547	Up Regulated in ART	NA	NA	NA
TRIM61	NA	NA	NA	NA	NA	NA	1.77644	0.0197378	Up Regulated in ART
TRIP11	NA	NA	NA	-0.39801	0.00865411	Down Regulated in ART	NA	NA	NA
TRIQK	NA	NA	NA	-0.6943	0.0229055	Down Regulated in ART	-1.05166	0.0472248	Down Regulated in ART
TRMT10C	NA	NA	NA	NA	NA	NA	0.944423	0.00166749	Up Regulated in ART
TRMT2B	NA	NA	NA	NA	NA	NA	0.41832	0.0448501	Up Regulated in ART
TRPC4AP	NA	NA	NA	0.231355	0.0471182	Up Regulated in ART	NA	NA	NA
TRRAP	NA	NA	NA	NA	NA	NA	-0.479743	0.0136705	Down Regulated in ART
TSPYL1	NA	NA	NA	NA	NA	NA	0.857646	0.0108317	Up Regulated in ART
TSPYL4	NA	NA	NA	NA	NA	NA	0.639142	0.00553214	Up Regulated in ART
TSR2	NA	NA	NA	NA	NA	NA	0.513023	0.00412371	Up Regulated in ART
TTC39A	NA	NA	NA	-1.73843	0.0110254	Down Regulated in ART	NA	NA	NA
TTF1	NA	NA	NA	NA	NA	NA	0.538622	0.00546105	Up Regulated in ART
TUSC2	NA	NA	NA	NA	NA	NA	0.400993	0.0143722	Up Regulated in ART
TWNK	NA	NA	NA	NA	NA	NA	0.711422	0.045276	Up Regulated in ART
TXN	NA	NA	NA	NA	NA	NA	0.55886	0.00744855	Up Regulated in ART
UBA7	NA	NA	NA	0.376441	0.0422815	Up Regulated in ART	NA	NA	NA
UBAP1	NA	NA	NA	NA	NA	NA	0.4892	0.0202306	Up Regulated in ART
UBL5	NA	NA	NA	NA	NA	NA	0.873196	0.000635116	Up Regulated in ART
UFC1	NA	NA	NA	NA	NA	NA	0.641796	0.000368966	Up Regulated in ART
UFM1	0.475703	0.0445717	Up Regulated in VP	NA	NA	NA	NA	NA	NA
UIMC1	NA	NA	NA	NA	NA	NA	0.36611	0.0228383	Up Regulated in ART
UNC119	NA	NA	NA	0.457463	0.0407084	Up Regulated in ART	NA	NA	NA
UPP1	NA	NA	NA	0.540825	0.00178235	Up Regulated in ART	NA	NA	NA
UQCRB	NA	NA	NA	NA	NA	NA	0.808447	0.000245102	Up Regulated in ART
UQCRFS1	NA	NA	NA	NA	NA	NA	0.560403	0.00792912	Up Regulated in ART
UQCRH	NA	NA	NA	NA	NA	NA	0.793416	2.05491e-05	Up Regulated in ART
USF1	NA	NA	NA	0.543332	0.00215908	Up Regulated in ART	NA	NA	NA
USP11	NA	NA	NA	0.344378	0.0150027	Up Regulated in ART	NA	NA	NA
UVSSA	NA	NA	NA	NA	NA	NA	-0.851057	0.000834489	Down Regulated in ART
UXS1	NA	NA	NA	NA	NA	NA	0.404966	0.030842	Up Regulated in ART
VAC14	NA	NA	NA	NA	NA	NA	-0.447005	0.0376172	Down Regulated in ART
VAMP1	NA	NA	NA	0.774283	0.000302643	Up Regulated in ART	NA	NA	NA
VAMP4	NA	NA	NA	-0.329137	0.0486678	Down Regulated in ART	NA	NA	NA
VDAC2	NA	NA	NA	NA	NA	NA	0.537974	0.00411881	Up Regulated in ART
VEZT	NA	NA	NA	-0.319537	0.0342707	Down Regulated in ART	NA	NA	NA
VIT	NA	NA	NA	NA	NA	NA	-3.05041	0.0115992	Down Regulated in ART
VPS11	NA	NA	NA	0.228432	0.0397268	Up Regulated in ART	NA	NA	NA
VPS13C	NA	NA	NA	NA	NA	NA	-0.675021	0.0343489	Down Regulated in ART
VPS36	NA	NA	NA	NA	NA	NA	-0.750785	0.00834889	Down Regulated in ART
WDR53	NA	NA	NA	NA	NA	NA	0.545443	0.022679	Up Regulated in ART
WDR70	NA	NA	NA	NA	NA	NA	0.539321	0.000598165	Up Regulated in ART
WWC2	NA	NA	NA	-0.487496	0.046878	Down Regulated in ART	NA	NA	NA
XPOT	0.409388	0.0319219	Up Regulated in VP	NA	NA	NA	NA	NA	NA
YARS2	NA	NA	NA	NA	NA	NA	0.567321	0.0245004	Up Regulated in ART
YBX1	NA	NA	NA	NA	NA	NA	0.372605	0.0204158	Up Regulated in ART
ZBP1	NA	NA	NA	0.661325	0.000938339	Up Regulated in ART	NA	NA	NA
ZBTB4	NA	NA	NA	-0.289463	0.0395184	Down Regulated in ART	NA	NA	NA
ZBTB49	NA	NA	NA	NA	NA	NA	0.777551	0.0116152	Up Regulated in ART
ZC3H11A	NA	NA	NA	NA	NA	NA	-1.85016	0.0420885	Down Regulated in ART
ZCCHC3	NA	NA	NA	NA	NA	NA	0.563092	0.000267256	Up Regulated in ART
ZCCHC7	NA	NA	NA	NA	NA	NA	0.535811	0.0229874	Up Regulated in ART
ZDHHC2	NA	NA	NA	-0.474585	0.0407084	Down Regulated in ART	NA	NA	NA
ZDHHC21	NA	NA	NA	NA	NA	NA	-0.898663	0.00845662	Down Regulated in ART
ZFAND1	NA	NA	NA	-0.257048	0.0409088	Down Regulated in ART	NA	NA	NA
ZHX1C8orf76	NA	NA	NA	1.61594	0.0089214	Up Regulated in ART	NA	NA	NA
ZKSCAN3	NA	NA	NA	-0.456809	0.0151638	Down Regulated in ART	NA	NA	NA
ZMYM1	NA	NA	NA	-0.681468	0.0120914	Down Regulated in ART	NA	NA	NA
ZMYM6	NA	NA	NA	NA	NA	NA	-0.669975	0.00904911	Down Regulated in ART
ZNF101	NA	NA	NA	NA	NA	NA	0.972307	0.00106579	Up Regulated in ART
ZNF134	NA	NA	NA	NA	NA	NA	1.0586	0.00418432	Up Regulated in ART
ZNF16	NA	NA	NA	NA	NA	NA	1.07867	3.25482e-06	Up Regulated in ART
ZNF169	NA	NA	NA	0.521118	0.0150942	Up Regulated in ART	NA	NA	NA
ZNF180	NA	NA	NA	NA	NA	NA	0.504065	0.0438288	Up Regulated in ART
ZNF212	NA	NA	NA	0.81039	3.79238e-06	Up Regulated in ART	NA	NA	NA
ZNF25	NA	NA	NA	-0.351151	0.0377026	Down Regulated in ART	NA	NA	NA
ZNF256	NA	NA	NA	NA	NA	NA	0.902847	0.0241098	Up Regulated in ART
ZNF260	NA	NA	NA	-0.550323	0.0362222	Down Regulated in ART	NA	NA	NA
ZNF267	NA	NA	NA	NA	NA	NA	1.11166	0.0118966	Up Regulated in ART
ZNF273	NA	NA	NA	NA	NA	NA	1.09365	0.0138704	Up Regulated in ART
ZNF281	NA	NA	NA	NA	NA	NA	0.727092	0.0214755	Up Regulated in ART
ZNF35	NA	NA	NA	NA	NA	NA	0.890504	0.0358423	Up Regulated in ART
ZNF350	NA	NA	NA	NA	NA	NA	0.810181	0.00441706	Up Regulated in ART
ZNF354A	NA	NA	NA	-0.439074	0.0160149	Down Regulated in ART	NA	NA	NA
ZNF41	NA	NA	NA	-0.316516	0.046878	Down Regulated in ART	NA	NA	NA
ZNF416	NA	NA	NA	NA	NA	NA	1.01474	0.00996429	Up Regulated in ART
ZNF518B	NA	NA	NA	NA	NA	NA	0.5819	0.0471928	Up Regulated in ART
ZNF543	NA	NA	NA	-0.508067	0.0427704	Down Regulated in ART	1.01454	0.0137417	Up Regulated in ART
ZNF551	NA	NA	NA	NA	NA	NA	1.11922	0.00632532	Up Regulated in ART
ZNF552	NA	NA	NA	NA	NA	NA	0.653878	0.00792985	Up Regulated in ART
ZNF567	NA	NA	NA	NA	NA	NA	0.536732	0.0428044	Up Regulated in ART
ZNF579	NA	NA	NA	0.587994	0.0157703	Up Regulated in ART	NA	NA	NA
ZNF585A	NA	NA	NA	NA	NA	NA	-0.654841	0.0100137	Down Regulated in ART
ZNF586	NA	NA	NA	NA	NA	NA	0.739236	0.00263474	Up Regulated in ART
ZNF627	NA	NA	NA	NA	NA	NA	1.04214	0.000196196	Up Regulated in ART
ZNF654	NA	NA	NA	-0.485536	0.0159531	Down Regulated in ART	NA	NA	NA
ZNF669	NA	NA	NA	NA	NA	NA	1.12512	0.000824263	Up Regulated in ART
ZNF677	NA	NA	NA	-0.667276	0.039496	Down Regulated in ART	NA	NA	NA
ZNF689	NA	NA	NA	NA	NA	NA	0.671704	0.0331494	Up Regulated in ART
ZNF791	NA	NA	NA	NA	NA	NA	0.469528	0.024244	Up Regulated in ART
ZNF830	NA	NA	NA	NA	NA	NA	1.05605	4.2609e-05	Up Regulated in ART
ZNF90	NA	NA	NA	-0.817285	0.0126954	Down Regulated in ART	NA	NA	NA
ZNHIT3	NA	NA	NA	NA	NA	NA	0.558655	0.00456998	Up Regulated in ART
ZNRF3	NA	NA	NA	-0.849821	0.0279355	Down Regulated in ART	NA	NA	NA
ZSWIM1	NA	NA	NA	NA	NA	NA	0.97842	0.000616987	Up Regulated in ART
ZSWIM8	-0.46715	0.0460329	Down Regulated in VP	NA	NA	NA	NA	NA	NA
ZXDA	NA	NA	NA	NA	NA	NA	0.878399	0.048817	Up Regulated in ART
