# Supplementary material for: Genome-scale metabolic models for natural and long-term drug-induced viral control in HIV infection
Source: Life Sci Alliance. 2022 May 10;5(9):e202201405. doi: 10.26508/lsa.202201405 (PMC9095731; doi:10.26508/lsa.202201405)
Supplement: Supplementary file 4 [file LSA-2022-01405_Supplementary_Data_3.xlsx]

## Sheet: Filtered_reactions
RXN_ID	SubSystem	ART	EC	HC	EQN	GENE
HMR_3804	Alanine, aspartate and glutamate metabolism	1000	1000	-1000	AKG[m] + 2 H+[m] + NADPH[m] + NH3[m] <=> glutamate[m] + H2O[m] + NADP+[m]	ENSG00000148672 or ENSG00000182890
HMR_3831	Alanine, aspartate and glutamate metabolism	568.552	983.87	NA	aspartate[c] => fumarate[c] + H+[c] + NH3[c]	ENSG00000091483
HMR_3829	Alanine, aspartate and glutamate metabolism	-251.819	3.55965	787.379	AKG[c] + aspartate[c] <=> glutamate[c] + OAA[c]	ENSG00000120053 or ENSG00000169154
HMR_3802	Alanine, aspartate and glutamate metabolism	-409.389	NA	834.95	AKG[m] + 2 H+[m] + NADH[m] + NH3[m] <=> glutamate[m] + H2O[m] + NAD+[m]	ENSG00000148672 or ENSG00000182890
HMR_4300	Amino sugar and nucleotide sugar metabolism	61.7534	NA	NA	fructose-6-phosphate[c] + glutamine[c] => glucosamine-6-phosphate[c] + glutamate[c]	ENSG00000131459 or ENSG00000198380
HMR_4299	Amino sugar and nucleotide sugar metabolism	61.7534	NA	NA	glucosamine-6-phosphate[c] + H2O[c] => fructose-6-phosphate[c] + H+[c] + NH3[c]	ENSG00000113552 or ENSG00000163281
HMR_3956	Arginine and proline metabolism	327.963	NA	NA	CO2[m] + H2O[m] => H+[m] + HCO3-[m]	ENSG00000169239 or ENSG00000174990
HMR_3142	Beta oxidation of even-chain fatty acids (mitochondrial)	NA	83.4534	NA	decanoyl-CoA[m] + FAD[m] => (2E)-decenoyl-CoA[m] + FADH2[m]	ENSG00000117054 or ENSG00000177646
HMR_1614	Bile acid biosynthesis	NA	NA	958.402	3alpha,7alpha,12alpha-trihydroxy-5beta-cholestan-26-al[m] + NADPH[m] + O2[m] => 3alpha,7alpha,12alpha-trihydroxy-5beta-cholestanate[m] + H2O[m] + NADP+[m]	ENSG00000135929
HMR_1604	Bile acid biosynthesis	104.327	295.143	NA	5beta-cholestan-3alpha,7alpha,12alpha-triol[c] + H+[c] + NADPH[c] + O2[c] => 5beta-cholestane-3alpha,7alpha,12alpha,26-tetrol[c] + H2O[c] + NADP+[c]	ENSG00000135929
HMR_1608	Bile acid biosynthesis	104.327	295.143	NA	5beta-cholestane-3alpha,7alpha,12alpha,26-tetrol[c] + NAD+[c] => 3alpha,7alpha,12alpha-trihydroxy-5beta-cholestan-26-al[c] + H+[c] + NADH[c]	ENSG00000135929
HMR_1685	Bile acid biosynthesis	1000	NA	NA	5beta-cholestane-3alpha,7alpha,26-triol[m] + NADP+[m] => 3alpha,7alpha-dihydroxy-5beta-cholestan-26-al[m] + H+[m] + NADPH[m]	ENSG00000135929
RE2625M	Bile acid biosynthesis	NA	NA	-958.402	5beta-cholestane-3alpha,7alpha,12alpha,26-tetrol[m] + NAD+[m] <=> 3alpha,7alpha,12alpha-trihydroxy-5beta-cholestan-27-al[m] + H+[m] + NADH[m]	ENSG00000135929
HMR_1609	Bile acid biosynthesis	NA	NA	958.402	5beta-cholestane-3alpha,7alpha,12alpha,26-tetrol[m] + NAD+[m] => 3alpha,7alpha,12alpha-trihydroxy-5beta-cholestan-26-al[m] + H+[m] + NADH[m]	ENSG00000135929
HMR_1611	Bile acid biosynthesis	104.327	295.143	NA	3alpha,7alpha,12alpha-trihydroxy-5beta-cholestan-26-al[c] + H2O[c] + NAD+[c] => 3alpha,7alpha,12alpha-trihydroxy-5beta-cholestanate[c] + 2 H+[c] + NADH[c]	ENSG00000135929
HMR_1806	Bile acid biosynthesis	104.327	295.143	NA	3alpha,7alpha,12alpha-trihydroxy-5beta-cholestan-27-al[m] + H+[m] + NADH[m] <=> 5beta-cholestane-3alpha,7alpha,12alpha,27-tetraol[m] + NAD+[m]	ENSG00000135929
HMR_1693	Bile acid biosynthesis	NA	178.268	NA	3alpha,7alpha-dihydroxy-5beta-cholestan-26-al[m] + NADPH[m] + O2[m] => 3alpha,7alpha-dihydroxy-5beta-cholestanate[m] + H2O[m] + NADP+[m]	ENSG00000135929
HMR_1802	Bile acid biosynthesis	-104.327	-295.143	NA	5beta-cholestan-3alpha,7alpha,12alpha-triol[m] + H+[m] + NADPH[m] + O2[m] <=> 5beta-cholestane-3alpha,7alpha,12alpha,27-tetraol[m] + H2O[m] + NADP+[m]	ENSG00000130649 or ENSG00000135929
RE1804M	Bile acid biosynthesis	-1000	NA	NA	5beta-cholestane-3alpha,7alpha,26-triol[m] + NAD+[m] <=> 3alpha,7alpha-dihydroxy-5beta-cholestan-26-al[m] + H+[m] + NADH[m]	ENSG00000135929
RE1807M	Bile acid biosynthesis	NA	-178.268	NA	3alpha,7alpha-dihydroxy-5beta-cholestan-26-al[m] + H2O[m] + NADP+[m] <=> 3alpha,7alpha-dihydroxy-5beta-cholestanate[m] + 2 H+[m] + NADPH[m]	ENSG00000135929
HMR_1877	Bile acid recycling	NA	1000	1000	GSH[c] + HCO3-[c] + taurocholate[s] <=> GSH[s] + HCO3-[s] + taurocholate[c]	ENSG00000021488 or ENSG00000084453 or ENSG00000111700
HMR_1893	Bile acid recycling	NA	-1000	1000	HCO3-[c] + S-glutathionyl-2-4-dinitrobenzene[c] + taurochenodeoxycholate[s] <=> HCO3-[s] + S-glutathionyl-2-4-dinitrobenzene[s] + taurochenodeoxycholate[c]	ENSG00000021488 or ENSG00000084453 or ENSG00000111700
HMR_1876	Bile acid recycling	NA	-1000	-1000	glycocholate[s] + GSH[c] + HCO3-[c] <=> glycocholate[c] + GSH[s] + HCO3-[s]	ENSG00000021488 or ENSG00000084453 or ENSG00000111700
HMR_1892	Bile acid recycling	NA	-1000	-1000	glutathionyl-leukotriene C4[c] + HCO3-[c] + taurochenodeoxycholate[s] <=> glutathionyl-leukotriene C4[s] + HCO3-[s] + taurochenodeoxycholate[c]	ENSG00000021488 or ENSG00000084453 or ENSG00000111700
HMR_1888	Bile acid recycling	NA	-1000	NA	chenodiol[s] + HCO3-[c] + S-glutathionyl-ethacrynic acid[c] <=> chenodiol[c] + HCO3-[s] + S-glutathionyl-ethacrynic acid[s]	ENSG00000021488 or ENSG00000084453 or ENSG00000111700
HMR_1883	Bile acid recycling	NA	NA	-1000	glutathionyl-leukotriene C4[c] + glycocholate[s] + HCO3-[c] <=> glutathionyl-leukotriene C4[s] + glycocholate[c] + HCO3-[s]	ENSG00000021488 or ENSG00000084453 or ENSG00000111700
HMR_1881	Bile acid recycling	NA	1000	1000	cholate[s] + HCO3-[c] + S-glutathionyl-2-4-dinitrobenzene[c] <=> cholate[c] + HCO3-[s] + S-glutathionyl-2-4-dinitrobenzene[s]	ENSG00000021488 or ENSG00000084453 or ENSG00000111700
HMR_1882	Bile acid recycling	NA	1000	1000	cholate[s] + HCO3-[c] + S-glutathionyl-ethacrynic acid[c] <=> cholate[c] + HCO3-[s] + S-glutathionyl-ethacrynic acid[s]	ENSG00000021488 or ENSG00000084453 or ENSG00000111700
HMR_1887	Bile acid recycling	NA	1000	-1000	chenodiol[s] + HCO3-[c] + S-glutathionyl-2-4-dinitrobenzene[c] <=> chenodiol[c] + HCO3-[s] + S-glutathionyl-2-4-dinitrobenzene[s]	ENSG00000021488 or ENSG00000084453 or ENSG00000111700
HMR_1894	Bile acid recycling	NA	1000	-1000	HCO3-[c] + S-glutathionyl-ethacrynic acid[c] + taurochenodeoxycholate[s] <=> HCO3-[s] + S-glutathionyl-ethacrynic acid[s] + taurochenodeoxycholate[c]	ENSG00000021488 or ENSG00000084453 or ENSG00000111700
HMR_1890	Bile acid recycling	NA	NA	-1000	HCO3-[c] + S-glutathionyl-2-4-dinitrobenzene[c] + taurocholate[s] <=> HCO3-[s] + S-glutathionyl-2-4-dinitrobenzene[s] + taurocholate[c]	ENSG00000021488 or ENSG00000084453 or ENSG00000111700
HMR_1885	Bile acid recycling	NA	1000	1000	glycocholate[s] + HCO3-[c] + S-glutathionyl-ethacrynic acid[c] <=> glycocholate[c] + HCO3-[s] + S-glutathionyl-ethacrynic acid[s]	ENSG00000021488 or ENSG00000084453 or ENSG00000111700
HMR_1879	Bile acid recycling	NA	1000	986.939	GSH[c] + HCO3-[c] + taurochenodeoxycholate[s] <=> GSH[s] + HCO3-[s] + taurochenodeoxycholate[c]	ENSG00000021488 or ENSG00000084453 or ENSG00000111700
HMR_1875	Bile acid recycling	NA	-1000	-1000	cholate[s] + GSH[c] + HCO3-[c] <=> cholate[c] + GSH[s] + HCO3-[s]	ENSG00000021488 or ENSG00000084453 or ENSG00000111700
HMR_1886	Bile acid recycling	NA	NA	1000	chenodiol[s] + glutathionyl-leukotriene C4[c] + HCO3-[c] <=> chenodiol[c] + glutathionyl-leukotriene C4[s] + HCO3-[s]	ENSG00000021488 or ENSG00000084453 or ENSG00000111700
HMR_1889	Bile acid recycling	NA	-1000	-1000	glutathionyl-leukotriene C4[c] + HCO3-[c] + taurocholate[s] <=> glutathionyl-leukotriene C4[s] + HCO3-[s] + taurocholate[c]	ENSG00000021488 or ENSG00000084453 or ENSG00000111700
HMR_1880	Bile acid recycling	NA	-1000	-1000	cholate[s] + glutathionyl-leukotriene C4[c] + HCO3-[c] <=> cholate[c] + glutathionyl-leukotriene C4[s] + HCO3-[s]	ENSG00000021488 or ENSG00000084453 or ENSG00000111700
HMR_1884	Bile acid recycling	NA	NA	1000	glycocholate[s] + HCO3-[c] + S-glutathionyl-2-4-dinitrobenzene[c] <=> glycocholate[c] + HCO3-[s] + S-glutathionyl-2-4-dinitrobenzene[s]	ENSG00000021488 or ENSG00000084453 or ENSG00000111700
HMR_1891	Bile acid recycling	NA	NA	1000	HCO3-[c] + S-glutathionyl-ethacrynic acid[c] + taurocholate[s] <=> HCO3-[s] + S-glutathionyl-ethacrynic acid[s] + taurocholate[c]	ENSG00000021488 or ENSG00000084453 or ENSG00000111700
HMR_1436	Butanoate metabolism	NA	305.506	112.052	acetoacetate[c] + ATP[c] + CoA[c] => acetoacetyl-CoA[c] + AMP[c] + PPi[c]	ENSG00000081760
HMR_1434	Butanoate metabolism	NA	305.506	112.052	acetoacetyl-CoA[c] + CoA[c] <=> 2 acetyl-CoA[c]	ENSG00000120437
HMR_8662	C5-branched dibasic acid metabolism	NA	-1000	NA	CoA[m] + GTP[m] + itaconate[m] <=> GDP[m] + itaconyl-CoA[m] + Pi[m]	(ENSG00000163541 and ENSG00000172340) or (ENSG00000136143 and ENSG00000163541)
HMR_8663	C5-branched dibasic acid metabolism	NA	-1000	NA	ADP[m] + itaconyl-CoA[m] + Pi[m] <=> ATP[m] + CoA[m] + itaconate[m]	(ENSG00000163541 and ENSG00000172340) or (ENSG00000136143 and ENSG00000163541)
HMR_2666	Carnitine shuttle (cytosolic)	-1000	1000	1000	(9E)-octadecenoyl-CoA[c] + L-carnitine[c] <=> (9E)-octadecenoylcarnitine[c] + CoA[c]	ENSG00000110090 or ENSG00000169169 or ENSG00000205560
HMR_2636	Carnitine shuttle (cytosolic)	1000	NA	-199.806	CoA[c] + palmitoleoyl-carnitine[c] <=> L-carnitine[c] + palmitoleoyl-CoA[c]	ENSG00000110090 or ENSG00000169169 or ENSG00000205560
HMR_2633	Carnitine shuttle (cytosolic)	NA	1000	NA	7-hexadecenoyl-CoA[c] + L-carnitine[c] <=> CoA[c] + hexadecenoylcarnitine(9)[c]	ENSG00000110090 or ENSG00000169169 or ENSG00000205560
HMR_2626	Carnitine shuttle (cytosolic)	NA	1000	199.806	CoA[c] + L-palmitoylcarnitine[c] <=> L-carnitine[c] + palmitoyl-CoA[c]	ENSG00000110090 or ENSG00000169169 or ENSG00000205560
HMR_2593	Carnitine shuttle (mitochondrial)	1000	422.284	-563.275	CoA[m] + O-acetylcarnitine[m] <=> acetyl-CoA[m] + L-carnitine[m]	ENSG00000095321 or ENSG00000157184
HMR_2596	Carnitine shuttle (mitochondrial)	NA	-1000	NA	L-carnitine[c] + O-propanoylcarnitine[m] <=> L-carnitine[m] + O-propanoylcarnitine[c]	ENSG00000178537 or ENSG00000197119
HMR_2658	Carnitine shuttle (mitochondrial)	-1000	-1000	NA	L-carnitine[c] + octadecenoylcarnitine(5)[m] <=> L-carnitine[m] + octadecenoylcarnitine(5)[c]	ENSG00000149742 or ENSG00000175003 or ENSG00000178537 or ENSG00000197119 or ENSG00000197208
HMR_2655	Carnitine shuttle (mitochondrial)	-1000	1000	1000	L-carnitine[c] + stearoylcarnitine[m] <=> L-carnitine[m] + stearoylcarnitine[c]	ENSG00000149742 or ENSG00000175003 or ENSG00000178537 or ENSG00000197119 or ENSG00000197208
HMR_2629	Carnitine shuttle (mitochondrial)	1000	1000	NA	L-carnitine[c] + L-palmitoylcarnitine[m] <=> L-carnitine[m] + L-palmitoylcarnitine[c]	ENSG00000149742 or ENSG00000175003 or ENSG00000178537 or ENSG00000197119 or ENSG00000197208
HMR_2598	Carnitine shuttle (mitochondrial)	NA	NA	-1000	CoA[m] + O-propanoylcarnitine[m] <=> L-carnitine[m] + propanoyl-CoA[m]	ENSG00000095321 or ENSG00000157184
r1381	Cholesterol metabolism	NA	1000	NA	lathosterol[r] <=> cholestenol[r]	ENSG00000147155
EBP2r	Cholesterol metabolism	NA	1000	NA	cholestenol[r] => lathosterol[r]	ENSG00000147155
RE3446M	Eicosanoid metabolism	NA	-1000	-1000	10,11-dihydro-12-epi-LTB4[m] + ATP[m] + CoA[m] <=> 10,11-dihydro-LTB4-CoA[m] + AMP[m] + PPi[m]	ENSG00000068366 or ENSG00000123983 or ENSG00000151726 or ENSG00000164398 or ENSG00000197142
HMR_0226	Fatty acid activation (cytosolic)	1000	NA	NA	AMP[c] + palmitoleoyl-CoA[c] + PPi[c] <=> ATP[c] + CoA[c] + palmitolate[c]	ENSG00000068366 or ENSG00000103740 or ENSG00000123983 or ENSG00000130377 or ENSG00000140284 or ENSG00000151726 or ENSG00000164398 or ENSG00000197142 or ENSG00000239642
HMR_0267	Fatty acid activation (cytosolic)	1000	-1000	-1000	(9E)-octadecenoyl-CoA[c] + AMP[c] + PPi[c] <=> ATP[c] + CoA[c] + elaidate[c]	ENSG00000068366 or ENSG00000103740 or ENSG00000123983 or ENSG00000130377 or ENSG00000140284 or ENSG00000151726 or ENSG00000164398 or ENSG00000197142 or ENSG00000239642
DESAT16_2	Fatty acid biosynthesis	NA	NA	199.806	H+[c] + NADH[c] + O2[c] + palmitoyl-CoA[c] => 2 H2O[c] + NAD+[c] + palmitoleoyl-CoA[c]	ENSG00000099194
HMR_2287	Fatty acid desaturation (even-chain)	NA	1000	NA	H+[c] + NADPH[c] + O2[c] + palmitoyl-CoA[c] => 7-hexadecenoyl-CoA[c] + 2 H2O[c] + NADP+[c]	ENSG00000099194 or ENSG00000145284
C51CPT1	Fatty acid oxidation	NA	NA	-1000	L-carnitine[c] + tiglyl-CoA[c] <=> CoA[c] + Tiglyl Carnitine[c]	ENSG00000110090 or ENSG00000169169 or ENSG00000205560
r1252	Fatty acid oxidation	1000	NA	NA	ATP[c] + CoA[c] + palmitolate[c] => AMP[c] + PPi[c] + (2E)-hexadecenoyl-CoA[c]	ENSG00000068366 or ENSG00000123983 or ENSG00000130377 or ENSG00000140284 or ENSG00000151726 or ENSG00000164398 or ENSG00000197142
C180CRNt	Fatty acid oxidation	-1000	1000	1000	stearoylcarnitine[c] <=> stearoylcarnitine[m]	ENSG00000178537
C161CPT12	Fatty acid oxidation	1000	NA	NA	L-carnitine[c] + (2E)-hexadecenoyl-CoA[c] <=> CoA[c] + hexadecenoylcarnitine(9)[c]	ENSG00000110090 or ENSG00000169169 or ENSG00000205560
r1447	Fatty acid oxidation	NA	NA	27.9597	lauroyl-CoA[m] + ubiquinone[m] => (2E)-dodecenoyl-CoA[m] + ubiquinol[m]	ENSG00000087008 or ENSG00000161533
C160CRNt	Fatty acid oxidation	NA	NA	-1000	L-palmitoylcarnitine[c] <=> L-palmitoylcarnitine[m]	ENSG00000178537
FACOAL1813	Fatty acid oxidation	1000	-1000	-1000	ATP[c] + CoA[c] + elaidate[c] <=> (2E)-octadecenoyl-CoA[c] + AMP[c] + PPi[c]	ENSG00000151726
2MB2COAc	Fatty acid oxidation	NA	NA	-1000	tiglyl-CoA[m] <=> tiglyl-CoA[c]	ENSG00000155368
PCRNtm	Fatty acid oxidation	NA	-1000	-1000	O-propanoylcarnitine[c] <=> O-propanoylcarnitine[m]	ENSG00000178537
ELAIDCPT1	Fatty acid oxidation	1000	-1000	-1000	(2E)-octadecenoyl-CoA[c] + L-carnitine[c] <=> (9E)-octadecenoylcarnitine[c] + CoA[c]	ENSG00000110090 or ENSG00000169169 or ENSG00000205560
C181CRNt	Fatty acid oxidation	NA	NA	1000	octadecenoylcarnitine(5)[c] <=> octadecenoylcarnitine(5)[m]	ENSG00000178537
r0735	Fatty acid oxidation	NA	-83.4534	NA	decanoyl-CoA[m] + NADP+[m] <=> (2E)-decenoyl-CoA[m] + H+[m] + NADPH[m]	ENSG00000115425 or ENSG00000116353
r0638	Fatty acid oxidation	NA	NA	-27.9597	lauroyl-CoA[m] + NADP+[m] <=> (2E)-dodecenoyl-CoA[m] + H+[m] + NADPH[m]	ENSG00000115425 or ENSG00000116353
HMR_4444	Folate metabolism	1000	1000	-165.05	5,10-methenyl-THF[m] + NADPH[m] <=> 5,10-methylene-THF[m] + NADP+[m]	ENSG00000065911 or ENSG00000100714 or ENSG00000120254
HMR_4656	Folate metabolism	NA	NA	502.316	folate[m] + NADPH[m] => dihydrofolate[m] + NADP+[m]	ENSG00000178700 or ENSG00000228716
HMR_3923	Folate metabolism	NA	NA	502.316	glycine[m] + NAD+[m] + THF[m] => 5,10-methylene-THF[m] + CO2[m] + H+[m] + NADH[m] + NH3[m]	ENSG00000091140 and ENSG00000140905 and ENSG00000145020 and ENSG00000178445
HMR_4448	Folate metabolism	NA	791.574	507.568	5,10-methylene-THF[c] + 2 H+[c] + NADH[c] => 5-methyl-THF[c] + NAD+[c]	ENSG00000177000
HMR_4440	Folate metabolism	-1000	-1000	165.05	5,10-methenyl-THF[m] + NADH[m] <=> 5,10-methylene-THF[m] + NAD+[m]	ENSG00000065911 or ENSG00000163738
HMR_4335	Folate metabolism	NA	NA	502.316	dihydrofolate[m] + H+[m] + NADPH[m] <=> NADP+[m] + THF[m]	ENSG00000178700 or ENSG00000228716
HMR_4315	Fructose and mannose metabolism	NA	NA	-666.667	D-glucitol[c] + NAD+[c] <=> fructose[c] + H+[c] + NADH[c]	ENSG00000140263
HMR_4775	Galactose metabolism	NA	1000	941.787	D-tagatose-6-phosphate[c] + ITP[c] <=> H+[c] + IDP[c] + tagatose-1,6-bisphosphate[c]	ENSG00000067057 or ENSG00000141959 or ENSG00000152556
HMR_4774	Galactose metabolism	NA	1000	941.787	CDP[c] + H+[c] + tagatose-1,6-bisphosphate[c] <=> CTP[c] + D-tagatose-6-phosphate[c]	ENSG00000067057 or ENSG00000141959 or ENSG00000152556
HMR_3933	Glutathione metabolism	1000	-1000	800.194	formylglutathione[c] + H+[c] + NADH[c] <=> hydroxymethylglutathione[c] + NAD+[c]	ENSG00000197894
HMR_4120	Glutathione metabolism	NA	NA	367.561	2 GSH[s] + H2O2[s] => GSSG[s] + 2 H2O[s]	ENSG00000116157 or ENSG00000117450 or ENSG00000117592 or ENSG00000126432 or ENSG00000164294 or ENSG00000165672 or ENSG00000167468 or ENSG00000167815 or ENSG00000176153 or ENSG00000198704 or ENSG00000211445 or ENSG00000224586 or ENSG00000233276
HMR_3937	Glutathione metabolism	NA	NA	199.806	formylglutathione[c] + H2O[c] => formate[c] + GSH[c] + H+[c]	ENSG00000139684
HMR_8769	Glutathione metabolism	NA	NA	13.0606	alanine[c] + GSH[c] => (5-L-glutamyl)-L-amino acid[s] + cys-gly[s]	ENSG00000099998 or ENSG00000100031 or ENSG00000100121 or ENSG00000131067 or ENSG00000133475 or ENSG00000149435 or ENSG00000167741
HMR_7612	Glycerophospholipid metabolism	1000	1000	NA	2-acetyl-1-alkyl-sn-glycero-3-phosphocholine[s] + H2O[s] => 1-organyl-2-lyso-sn-glycero-3-phosphocholine[s] + acetate[s] + H+[s]	ENSG00000146070
HMR_3843	Glycine, serine and threonine metabolism	NA	271.987	40.274	3-phosphoserine[c] + H2O[c] => Pi[c] + serine[c]	ENSG00000111237 or ENSG00000146733
HMR_6409	Glycine, serine and threonine metabolism	NA	NA	-56.5024	H+[m] + lipoamide[m] + NADH[m] <=> dihydrolipoamide[m] + NAD+[m]	ENSG00000091140 and ENSG00000140905 and ENSG00000145020 and ENSG00000178445
HMR_3845	Glycine, serine and threonine metabolism	-1000	NA	-395.435	serine[c] + THF[c] <=> 5,10-methylene-THF[c] + glycine[c] + H2O[c]	ENSG00000176974
HMR_3841	Glycine, serine and threonine metabolism	NA	271.987	40.274	3-phosphonooxypyruvate[c] + glutamate[c] <=> 3-phosphoserine[c] + AKG[c]	ENSG00000135069
HMR_3839	Glycine, serine and threonine metabolism	NA	271.987	40.274	3-phospho-D-glycerate[c] + NAD+[c] <=> 3-phosphonooxypyruvate[c] + H+[c] + NADH[c]	ENSG00000092621 or ENSG00000134882
HMR_3752	Glycine, serine and threonine metabolism	211.831	1000	NA	FADH2[m] + methacrylyl-CoA[m] <=> FAD[m] + isobutyryl-CoA[m]	ENSG00000196177
HMR_7747	Glycolysis / Gluconeogenesis	NA	NA	666.667	ADP[c] + beta-D-glucose[c] => AMP[c] + beta-D-glucose-6-phosphate[c] + H+[c]	ENSG00000159322
HMR_4381	Glycolysis / Gluconeogenesis	1000	-1000	-1000	fructose-6-phosphate[c] <=> glucose-6-phosphate[c]	ENSG00000105220
HMR_4301	Glycolysis / Gluconeogenesis	NA	585.905	NA	fructose-6-phosphate[c] + UTP[c] => fructose-1,6-bisphosphate[c] + H+[c] + UDP[c]	ENSG00000067057 or ENSG00000141959 or ENSG00000152556 or ENSG00000160226
HMR_6410	Glycolysis / Gluconeogenesis	NA	NA	56.5024	H+[m] + lipoamide[m] + pyruvate[m] => CO2[m] + S-acetyldihydrolipoamide[m]	(ENSG00000131828 and ENSG00000168291) or (ENSG00000163114 and ENSG00000168291)
HMR_4391	Glycolysis / Gluconeogenesis	636.642	-259.56	348.591	DHAP[c] <=> GAP[c]	ENSG00000111669
HMR_4358	Glycolysis / Gluconeogenesis	NA	NA	1000	ADP[c] + H+[c] + PEP[c] => ATP[c] + pyruvate[c]	ENSG00000067225 or ENSG00000121900 or ENSG00000143627 or ENSG00000143630
HMR_7748	Glycolysis / Gluconeogenesis	-1000	1000	1000	beta-D-glucose-6-phosphate[c] <=> glucose-6-phosphate[c]	ENSG00000105220
HMR_4355	Glycolysis / Gluconeogenesis	363.358	NA	NA	DHAP[c] + erythrose-4-phosphate[c] => sedoheptulose-1,7-bisphosphate[c]	ENSG00000109107 or ENSG00000136872 or ENSG00000149925 or ENSG00000285043
HMR_4137	Glycolysis / Gluconeogenesis	NA	141.286	NA	CoA[m] + NAD+[m] + pyruvate[m] => acetyl-CoA[m] + CO2[m] + NADH[m]	ENSG00000091140 and ENSG00000110435 and (ENSG00000131828 or ENSG00000163114) and ENSG00000150768 and ENSG00000168291
HMR_7745	Glycolysis / Gluconeogenesis	NA	NA	-666.667	beta-D-glucose[c] <=> glucose[c]	ENSG00000143891
HMR_6412	Glycolysis / Gluconeogenesis	NA	NA	56.5024	CoA[m] + S-acetyldihydrolipoamide[m] => acetyl-CoA[m] + dihydrolipoamide[m]	(ENSG00000091140 and ENSG00000131828 and ENSG00000150768 and ENSG00000168291) or (ENSG00000091140 and ENSG00000150768 and ENSG00000163114 and ENSG00000168291)
HMR_7749	Glycolysis / Gluconeogenesis	1000	-1000	-333.333	beta-D-glucose-6-phosphate[c] <=> fructose-6-phosphate[c]	ENSG00000105220
HMR_1264	Leukotriene metabolism	NA	-1000	-1000	10,11-dihydro-LTB4-CoA[m] + AMP[m] + PPi[m] <=> 10,11-dihydro-LTB4[m] + ATP[m] + CoA[m]	ENSG00000068366 or ENSG00000103740 or ENSG00000123983 or ENSG00000130377 or ENSG00000140284 or ENSG00000151726 or ENSG00000164398 or ENSG00000197142 or ENSG00000239642
HMR_1232	Leukotriene metabolism	NA	1000	1000	10,11-dihydro-12-oxo-LTB4[m] + H+[m] + NADPH[m] => 10,11-dihydro-LTB4[m] + NADP+[m]	ENSG00000157326 or ENSG00000159228 or ENSG00000159231
HMR_1281	Leukotriene metabolism	NA	1000	1000	10,11-dihydro-12-epi-LTB4[m] + NADP+[m] <=> 10,11-dihydro-12-oxo-LTB4[m] + H+[m] + NADPH[m]	ENSG00000157326 or ENSG00000159228 or ENSG00000159231
HMR_3955	Miscellaneous	1000	NA	NA	CO2[c] + H2O[c] => H+[c] + HCO3-[c]	ENSG00000074410 or ENSG00000104267 or ENSG00000107159 or ENSG00000118298 or ENSG00000131686 or ENSG00000133742 or ENSG00000159593 or ENSG00000164879 or ENSG00000167434 or ENSG00000168748 or ENSG00000169239 or ENSG00000174990 or ENSG00000178538 or ENSG00000185015
HMR_5407	Miscellaneous	-1000	-176.128	1000	CO2[s] + H2O[s] <=> carbonate[s]	ENSG00000074410 or ENSG00000104267 or ENSG00000107159 or ENSG00000118298 or ENSG00000131686 or ENSG00000133742 or ENSG00000159593 or ENSG00000164879 or ENSG00000167434 or ENSG00000168748 or ENSG00000169239 or ENSG00000174990 or ENSG00000178538 or ENSG00000185015
HMR_5128	Miscellaneous	-836.106	-465.129	NA	NH4+[s] <=> H+[s] + NH3[s]
RE1860E	Miscellaneous	554.343	-1000	-1000	H2O[s] + 2,3-cyclic-UMP[s] <=> H+[s] + 3-UMP[s]	ENSG00000173786
HMR_4201	Miscellaneous	NA	NA	199.806	H2O2[c] + methanol[c] => formaldehyde[c] + 2 H2O[c]	ENSG00000117592 or ENSG00000121053 or ENSG00000121691 or ENSG00000130508 or ENSG00000147485 or ENSG00000167419
HMR_7580	N-glycan metabolism	NA	931.145	NA	H2O[s] + PA6[s] => 6-deoxy-L-galactose[s] + de-Fuc form of PA6[s]	ENSG00000001036 or ENSG00000179163
HMR_8791	Nicotinate and nicotinamide metabolism	NA	-615.155	NA	H+[c] + nicotinamide[c] + ribose-1-phosphate[c] <=> nicotinamide ribonucleoside[c] + Pi[c]	ENSG00000198805
HMR_4262	Nicotinate and nicotinamide metabolism	NA	-615.155	NA	nicotinamide D-ribonucleotide[c] + PPi[c] <=> H+[c] + nicotinamide[c] + PRPP[c]	ENSG00000105835
HMR_4264	Nicotinate and nicotinamide metabolism	NA	615.155	NA	H2O[c] + nicotinamide D-ribonucleotide[c] => nicotinamide ribonucleoside[c] + Pi[c]	ENSG00000014257 or ENSG00000076685 or ENSG00000116981 or ENSG00000122643 or ENSG00000125458 or ENSG00000135318 or ENSG00000141698 or ENSG00000185013 or ENSG00000205309 or ENSG00000250741
HMR_8449	Nucleotide metabolism	NA	1000	1000	CDP[n] + dGDP[n] <=> CMP[n] + dGTP[n]	ENSG00000162368
HMR_7874	Nucleotide metabolism	1000	NA	NA	dGDP[n] + UDP[n] <=> dGTP[n] + UMP[n]	ENSG00000162368
HMR_8453	Nucleotide metabolism	-1000	1000	1000	2 dCDP[n] <=> dCMP[n] + dCTP[n]	ENSG00000162368
HMR_4680	Nucleotide metabolism	NA	561.056	-836.931	2-deoxy-D-ribose-1-phosphate[c] + uracil[c] <=> deoxyuridine[c] + Pi[c]	ENSG00000007001 or ENSG00000183696
HMR_7800	Nucleotide metabolism	1000	-305.506	-1000	ADP[c] + GDP[c] <=> AMP[c] + GTP[c]	ENSG00000154027
HMR_7864	Nucleotide metabolism	1000	NA	NA	CDP[n] + UDP[n] <=> CTP[n] + UMP[n]	ENSG00000162368
HMR_8463	Nucleotide metabolism	1000	NA	NA	CDP[c] + dCDP[c] <=> CTP[c] + dCMP[c]	ENSG00000162368
HMR_8450	Nucleotide metabolism	NA	970.75	1000	dCDP[c] + dGDP[c] <=> dCMP[c] + dGTP[c]	ENSG00000162368
HMR_8487	Nucleotide metabolism	966.626	NA	853.721	H2O[s] + UMP[s] => Pi[s] + uridine[s]	ENSG00000122643 or ENSG00000135318
HMR_8461	Nucleotide metabolism	NA	-1000	-1000	dCDP[c] + GDP[c] <=> dCMP[c] + GTP[c]	ENSG00000154027
HMR_8452	Nucleotide metabolism	NA	1000	1000	2 dCDP[c] <=> dCMP[c] + dCTP[c]	ENSG00000162368
HMR_8472	Nucleotide metabolism	1000	-1000	-1000	CDP[n] + dCDP[n] <=> CMP[n] + dCTP[n]	ENSG00000162368
HMR_7868	Nucleotide metabolism	-1000	1000	1000	GDP[n] + UDP[n] <=> GTP[n] + UMP[n]	ENSG00000162368
HMR_7870	Nucleotide metabolism	1000	-1000	-1000	dADP[n] + UDP[n] <=> dATP[n] + UMP[n]	ENSG00000162368
HMR_8459	Nucleotide metabolism	1000	-1000	-1000	ADP[n] + dCDP[n] <=> ATP[n] + dCMP[n]	ENSG00000162368
HMR_7876	Nucleotide metabolism	-1000	1000	1000	ADP[n] + UDP[n] <=> ATP[n] + UMP[n]	ENSG00000162368
HMR_7873	Nucleotide metabolism	-1000	1000	-1000	dGDP[c] + UDP[c] <=> dGTP[c] + UMP[c]	ENSG00000162368
HMR_8471	Nucleotide metabolism	1000	-1000	1000	CDP[c] + dCDP[c] <=> CMP[c] + dCTP[c]	ENSG00000162368
HMR_8462	Nucleotide metabolism	1000	NA	NA	dCDP[n] + GDP[n] <=> dCMP[n] + GTP[n]	ENSG00000162368
HMR_7871	Nucleotide metabolism	-1000	-1000	NA	dCDP[c] + UDP[c] <=> dCTP[c] + UMP[c]	ENSG00000162368
HMR_8460	Nucleotide metabolism	NA	-1000	-1000	CDP[n] + dCDP[n] <=> CTP[n] + dCMP[n]	ENSG00000162368
HMR_8464	Nucleotide metabolism	NA	-1000	-1000	CDP[n] + GDP[n] <=> CMP[n] + GTP[n]	ENSG00000162368
HMR_7890	Nucleotide metabolism	1000	NA	1000	ADP[m] + dCTP[m] <=> ATP[m] + dCDP[m]	ENSG00000011052 or ENSG00000103024 or ENSG00000103202 or ENSG00000112981 or ENSG00000143156 or ENSG00000155085 or ENSG00000172113 or ENSG00000239672 or ENSG00000243678
HMR_8467	Nucleotide metabolism	1000	970.75	-223.734	CDP[c] + UDP[c] <=> CMP[c] + UTP[c]	ENSG00000162368
HMR_8466	Nucleotide metabolism	-1000	1000	1000	2 CDP[n] <=> CMP[n] + CTP[n]	ENSG00000162368
HMR_8448	Nucleotide metabolism	NA	29.2503	-1000	CDP[c] + dGDP[c] <=> CMP[c] + dGTP[c]	ENSG00000162368
HMR_7867	Nucleotide metabolism	1000	-384.845	163.069	GDP[c] + UDP[c] <=> GTP[c] + UMP[c]	ENSG00000162368
HMR_8455	Nucleotide metabolism	-1000	1000	1000	dADP[n] + dCDP[n] <=> dATP[n] + dCMP[n]	ENSG00000162368
HMR_7801	Nucleotide metabolism	1000	-1000	1000	ADP[m] + GDP[m] <=> AMP[m] + GTP[m]	ENSG00000147853
HMR_3967	Nucleotide metabolism	-1000	1000	836.931	CDP[c] + GDP[c] <=> CMP[c] + GTP[c]	ENSG00000162368
HMR_3968	Nucleotide metabolism	NA	NA	159.152	ADP[c] + dUDP[c] <=> ATP[c] + dUMP[c]	ENSG00000168393
HMR_3977	Oxidative phosphorylation	NA	305.506	112.052	H2O[c] + PPi[c] => H+[c] + 2 Pi[c]	ENSG00000107902 or ENSG00000138777 or ENSG00000143363 or ENSG00000180817
HMR_6916	Oxidative phosphorylation	411.437	NA	NA	ADP[m] + Pi[m] + 3 H+[i] => ATP[m] + 2 H+[m] + H2O[m]	ENSG00000099624 and ENSG00000110955 and ENSG00000116459 and ENSG00000124172 and ENSG00000135390 and ENSG00000152234 and ENSG00000154518 and ENSG00000154723 and ENSG00000156411 and ENSG00000159199 and ENSG00000165629 and ENSG00000167283 and ENSG00000167863 and ENSG00000169020 and ENSG00000173915 and ENSG00000198899 and ENSG00000228253 and ENSG00000241468 and ENSG00000241837
HMR_8341	Pentose and glucuronate interconversions	NA	NA	666.667	H+[c] + L-arabinose[c] + NADPH[c] => L-arabitol[c] + NADP+[c]	ENSG00000053371 or ENSG00000085662 or ENSG00000117448
HMR_8342	Pentose and glucuronate interconversions	NA	NA	-666.667	H+[c] + L-xylulose[c] + NADH[c] <=> L-arabitol[c] + NAD+[c]
HMR_4592	Pentose and glucuronate interconversions	NA	NA	-666.667	D-xylose[c] + H+[c] + NADPH[c] <=> NADP+[c] + xylitol[c]	ENSG00000085662 or ENSG00000198074
HMR_4590	Pentose and glucuronate interconversions	NA	NA	666.667	H+[c] + L-xylulose[c] + NADPH[c] => NADP+[c] + xylitol[c]	ENSG00000169738
HMR_4306	Pentose phosphate pathway	1000	1000	NA	glucono-1,5-lactone-6-phosphate[c] + H+[c] + NADPH[c] <=> glucose-6-phosphate[c] + NADP+[c]	ENSG00000160211
HMR_4354	Pentose phosphate pathway	-819.85	878.857	-1000	ribose-1-phosphate[c] <=> ribose-5-phosphate[c]	ENSG00000079739 or ENSG00000169299
HMR_4404	Pentose phosphate pathway	-273.283	292.952	-333.333	D-xylulose-5-phosphate[c] + erythrose-4-phosphate[c] <=> fructose-6-phosphate[c] + GAP[c]	ENSG00000007350 or ENSG00000151005 or ENSG00000163931
HMR_4352	Pentose phosphate pathway	-546.567	585.905	-666.667	ribose-5-phosphate[c] <=> ribulose-5-phosphate[c]	ENSG00000153574
HMR_4565	Pentose phosphate pathway	90.0748	292.952	-333.333	GAP[c] + sedoheptulose-7-phosphate[c] <=> erythrose-4-phosphate[c] + fructose-6-phosphate[c]	ENSG00000177156
G6PDH2c	Pentose phosphate pathway	333.333	333.333	NA	3 glucose-6-phosphate[c] + 3 NADP+[c] => 3 glucono-1,5-lactone-6-phosphate[c] + 3 H+[c] + 3 NADPH[c]	ENSG00000160211
HMR_4501	Pentose phosphate pathway	-273.283	292.952	-333.333	D-xylulose-5-phosphate[c] + ribose-5-phosphate[c] <=> GAP[c] + sedoheptulose-7-phosphate[c]	ENSG00000007350 or ENSG00000151005 or ENSG00000163931
HMR_4398	Pentose phosphate pathway	NA	NA	636.151	2-deoxy-D-ribose-5-phosphate[c] <=> acetaldehyde[c] + GAP[c]	ENSG00000023697
HMR_4710	Pentose phosphate pathway	NA	NA	636.151	2-deoxy-D-ribose-1-phosphate[c] <=> 2-deoxy-D-ribose-5-phosphate[c]	ENSG00000169299 or ENSG00000180953
PHETA1m	Phenylalanine metabolism	NA	-987.43	NA	AKG[m] + phenylalanine[m] <=> glutamate[m] + phenylpyruvate[m]	ENSG00000125166 or ENSG00000198650
HMR_3797	Propanoate metabolism	1000	1000	-1000	AMP[m] + PPi[m] + propanoyl-CoA[m] <=> ATP[m] + CoA[m] + propanoate[m]	ENSG00000111058 or ENSG00000131069 or ENSG00000154930
HMR_4460	Propanoate metabolism	1000	1000	-1000	ATP[m] + H+[m] + propanoate[m] <=> PPi[m] + propinol adenylate[m]	ENSG00000111058 or ENSG00000131069 or ENSG00000154930
HMR_1325	Prostaglandin biosynthesis	NA	NA	1000	NAD+[c] + prostaglandin F2alpha[c] => H+[c] + NADH[c] + prostaglandin H2[c]	ENSG00000196139
HMR_1330	Prostaglandin biosynthesis	NA	NA	1000	prostaglandin H2[c] => prostaglandin D2[c]	ENSG00000107317 or ENSG00000163106
HMR_1329	Prostaglandin biosynthesis	NA	NA	1000	H+[c] + NADPH[c] + prostaglandin D2[c] <=> NADP+[c] + prostaglandin F2alpha[c]	ENSG00000196139
HMR_4004	Purine metabolism	-1000	1000	-1000	2 ADP[m] <=> AMP[m] + ATP[m]	ENSG00000004455 or ENSG00000085231 or ENSG00000106992 or ENSG00000140057 or ENSG00000147853 or ENSG00000154027 or ENSG00000155085 or ENSG00000162433 or ENSG00000165695 or ENSG00000273841
HMR_4002	Purine metabolism	NA	1000	1000	2 ADP[c] <=> AMP[c] + ATP[c]	ENSG00000004455 or ENSG00000085231 or ENSG00000106992 or ENSG00000140057 or ENSG00000147853 or ENSG00000154027 or ENSG00000155085 or ENSG00000162433 or ENSG00000165695 or ENSG00000273841
HMR_4418	Purine metabolism	NA	NA	316.787	IMP[c] + PPi[c] <=> hypoxanthine[c] + PRPP[c]	ENSG00000165704
HMR_4291	Purine metabolism	NA	-1000	-1000	ADP[c] + ITP[c] <=> ATP[c] + IDP[c]	ENSG00000011052 or ENSG00000103024 or ENSG00000103202 or ENSG00000112981 or ENSG00000143156 or ENSG00000172113 or ENSG00000239672 or ENSG00000243678
HMR_4016	Purine metabolism	1000	-690.351	-1000	ADP[c] + GTP[c] <=> ATP[c] + GDP[c]	ENSG00000011052 or ENSG00000103024 or ENSG00000103202 or ENSG00000112981 or ENSG00000143156 or ENSG00000172113 or ENSG00000239672 or ENSG00000243678
HMR_4570	Purine metabolism	-1000	1000	-1000	ADP[c] + dGTP[c] <=> ATP[c] + dGDP[c]	ENSG00000011052 or ENSG00000103024 or ENSG00000103202 or ENSG00000112981 or ENSG00000143156 or ENSG00000172113 or ENSG00000239672 or ENSG00000243678
HMR_4044	Purine metabolism	-1000	1000	-1000	ADP[c] + dATP[c] <=> ATP[c] + dADP[c]	ENSG00000011052 or ENSG00000103024 or ENSG00000103202 or ENSG00000112981 or ENSG00000143156 or ENSG00000172113 or ENSG00000239672 or ENSG00000243678
HMR_4651	Purine metabolism	-1000	438.944	-1000	guanosine[c] + Pi[c] <=> guanine[c] + ribose-1-phosphate[c]	ENSG00000198805
HMR_4574	Purine metabolism	180.15	-175.242	58.2128	inosine[c] + Pi[c] <=> hypoxanthine[c] + ribose-1-phosphate[c]	ENSG00000198805
HMR_4572	Purine metabolism	NA	1000	NA	ADP[m] + dGTP[m] => ATP[m] + dGDP[m]	ENSG00000011052 or ENSG00000103024 or ENSG00000103202 or ENSG00000112981 or ENSG00000143156 or ENSG00000172113 or ENSG00000239672 or ENSG00000243678
HMR_4489	Purine metabolism	183.209	NA	NA	dATP[c] + fructose[c] => dADP[c] + fructose-6-phosphate[c] + H+[c]	ENSG00000156510 or ENSG00000156515 or ENSG00000159399 or ENSG00000160883
HMR_4421	Purine metabolism	NA	347.309	NA	dADP[c] + H+[c] + PEP[c] => dATP[c] + pyruvate[c]	ENSG00000067225 or ENSG00000143627
HMR_4018	Purine metabolism	1000	NA	1000	ADP[m] + GTP[m] <=> ATP[m] + GDP[m]	ENSG00000011052 or ENSG00000103024 or ENSG00000103202 or ENSG00000112981 or ENSG00000143156 or ENSG00000172113 or ENSG00000239672 or ENSG00000243678
HMR_4621	Purine metabolism	NA	NA	159.152	thioredoxin[c] + UDP[c] => dUDP[c] + H2O[c] + oxidized thioredoxin[c]	(ENSG00000048392 and ENSG00000100348 and ENSG00000167325 and ENSG00000171848) or (ENSG00000048392 and ENSG00000136810 and ENSG00000167325 and ENSG00000171848)
HMR_4080	Purine metabolism	NA	NA	316.787	AMP[c] + H2O[c] => IMP[c] + NH3[c]	ENSG00000116337 or ENSG00000116748 or ENSG00000133805
HMR_4611	Purine metabolism	NA	512.429	NA	ATP[c] + thioredoxin[c] => dATP[c] + H2O[c] + oxidized thioredoxin[c]	(ENSG00000048392 and ENSG00000100348 and ENSG00000167325 and ENSG00000171848) or (ENSG00000048392 and ENSG00000136810 and ENSG00000167325 and ENSG00000171848)
HMR_4709	Purine metabolism	1000	NA	1000	2-deoxy-D-ribose-1-phosphate[c] + hypoxanthine[c] <=> deoxyinosine[c] + Pi[c]	ENSG00000025708 or ENSG00000198805
HMR_4635	Pyrimidine metabolism	-183.209	-1000	NA	ADP[c] + dTTP[c] <=> ATP[c] + dTDP[c]	ENSG00000011052 or ENSG00000103024 or ENSG00000103202 or ENSG00000112981 or ENSG00000143156 or ENSG00000172113 or ENSG00000239672 or ENSG00000243678
HMR_4642	Pyrimidine metabolism	NA	NA	159.152	dUMP[c] + H2O[c] => deoxyuridine[c] + Pi[c]	ENSG00000125458 or ENSG00000205309
HMR_4006	Pyrimidine metabolism	363.358	-1000	-1000	ADP[c] + UTP[c] <=> ATP[c] + UDP[c]	ENSG00000011052 or ENSG00000103024 or ENSG00000103202 or ENSG00000112981 or ENSG00000143156 or ENSG00000172113 or ENSG00000239672 or ENSG00000243678
HMR_6627	Pyrimidine metabolism	-1000	NA	-1000	dTDP[c] + H+[c] + PEP[c] <=> dTTP[c] + pyruvate[c]	ENSG00000067225 or ENSG00000143627
HMR_4670	Pyrimidine metabolism	-1000	-1000	1000	ADP[c] + dCTP[c] <=> ATP[c] + dCDP[c]	ENSG00000011052 or ENSG00000103024 or ENSG00000103202 or ENSG00000112981 or ENSG00000143156 or ENSG00000172113 or ENSG00000239672 or ENSG00000243678
HMR_4210	Pyrimidine metabolism	1000	NA	901.513	H+[c] + PEP[c] + UDP[c] => pyruvate[c] + UTP[c]	ENSG00000067225 or ENSG00000143627
HMR_3969	Pyrimidine metabolism	NA	NA	58.2128	ITP[c] + uridine[c] => H+[c] + IDP[c] + UMP[c]	ENSG00000130717 or ENSG00000143179
HMR_6614	Pyrimidine metabolism	-816.791	1000	-1000	dADP[c] + dTTP[c] <=> dATP[c] + dTDP[c]	ENSG00000011052 or ENSG00000103024 or ENSG00000103202 or ENSG00000112981 or ENSG00000143156 or ENSG00000172113 or ENSG00000239672 or ENSG00000243678
HMR_4091	Pyruvate metabolism	NA	141.286	NA	malate[m] + NADP+[m] => CO2[m] + NADPH[m] + pyruvate[m]	ENSG00000082212 or ENSG00000151376
HMR_4087	Pyruvate metabolism	NA	NA	56.5024	malate[m] + NAD+[m] => CO2[m] + NADH[m] + pyruvate[m]	ENSG00000082212 or ENSG00000151376
HMR_4143	Pyruvate metabolism	327.963	NA	NA	ATP[m] + HCO3-[m] + pyruvate[m] => ADP[m] + H+[m] + OAA[m] + Pi[m]	ENSG00000173599
HMR_1568	Pyruvate metabolism	NA	NA	636.151	acetaldehyde[c] + H2O[c] + NAD+[c] => acetate[c] + 2 H+[c] + NADH[c]	ENSG00000006534 or ENSG00000108602 or ENSG00000132746 or ENSG00000184254
HMR_4193	Pyruvate metabolism	NA	NA	58.2128	CDP[c] + H+[c] + PEP[c] => CTP[c] + pyruvate[c]	ENSG00000067225 or ENSG00000143627
HMR_6661	Retinol metabolism	NA	168.025	NA	13-cis-retinoate[c] <=> retinoate[c]	ENSG00000134184
HMR_6675	Retinol metabolism	NA	168.025	NA	13-cis-retinal[c] + H2O[c] + NAD+[c] <=> 13-cis-retinoate[c] + 2 H+[c] + NADH[c]	ENSG00000128918 or ENSG00000165092
HMR_6672	Retinol metabolism	NA	-168.025	NA	13-cis-retinal[c] <=> retinal[c]
HMR_8698	Retinol metabolism	321.866	NA	NA	2 H+[c] + NADPH[c] + retinoate[c] <=> H2O[c] + NADP+[c] + retinal[c]
HMR_3980	ROS detoxification	34.7756	98.381	NA	2 H2O2[c] => 2 H2O[c] + O2[c]	ENSG00000121691
HMR_4561	Serotonin and melatonin biosynthesis	NA	-338.49	NA	5-hydroxyindoleacetaldehyde[c] + H+[c] + NADPH[c] <=> 5-hydroxytryptophol[c] + NADP+[c]	ENSG00000147576 or ENSG00000172955 or ENSG00000187758 or ENSG00000196344 or ENSG00000196616 or ENSG00000197894 or ENSG00000198099 or ENSG00000248144
HMR_4559	Serotonin and melatonin biosynthesis	NA	338.49	NA	5-hydroxyindoleacetaldehyde[c] + H2O[c] + NAD+[c] => 5-hydroxyindoleacetate[c] + 2 H+[c] + NADH[c]	ENSG00000072210 or ENSG00000111275 or ENSG00000137124 or ENSG00000143149 or ENSG00000164904
HMR_0766	Sphingolipid metabolism	213.15	NA	NA	galactose[s] + glucosylceramide pool[s] => H2O[s] + LacCer pool[s]	ENSG00000115850 or ENSG00000163521 or ENSG00000170266
TREH	Starch and sucrose metabolism	NA	182.896	NA	H2O[c] + trehalose[c] => 2 glucose[c]	ENSG00000118094 or ENSG00000142102
HMR_3989	Starch and sucrose metabolism	NA	244.983	NA	H2O[s] + maltose[s] => 2 glucose[s]	ENSG00000092529 or ENSG00000171298 or ENSG00000214013 or ENSG00000257335
HMR_8582	Starch and sucrose metabolism	NA	NA	327.818	H2O[c] + maltose[c] => 2 fructose[c]	ENSG00000120563 or ENSG00000174876 or ENSG00000187733 or ENSG00000237763 or ENSG00000240038 or ENSG00000243480
HMR_8573	Starch and sucrose metabolism	NA	NA	881.402	H2O[s] + maltoheptaose[s] => glucose[s] + maltohexaose[s]	ENSG00000120563 or ENSG00000174876 or ENSG00000187733 or ENSG00000237763 or ENSG00000240038 or ENSG00000243480
HMR_5662	Transport reactions	1000	NA	NA	glycine[c] + Na+[s] + tryptophan[s] => glycine[s] + Na+[c] + tryptophan[c]	ENSG00000103064 or ENSG00000103257
HDCECRNtr	Transport reactions	1000	NA	NA	palmitoleoyl-carnitine[s] <=> palmitoleoyl-carnitine[c]
HMR_5889	Transport reactions	NA	153.856	NA	Na+[s] + ornithine[c] + valine[s] => Na+[c] + ornithine[s] + valine[c]	ENSG00000103064
HMR_6324	Transport reactions	NA	1000	1000	arginine[m] + H+[c] => arginine[c] + H+[m]	ENSG00000102743 or ENSG00000120329
HMR_5042	Transport reactions	-180.15	175.242	-58.2128	inosine[c] <=> inosine[s]	ENSG00000112759 or ENSG00000174669
HMR_6002	Transport reactions	-1000	-1000	524.099	acetoacetate[c] + formate[s] <=> acetoacetate[s] + formate[c]	ENSG00000100156 or ENSG00000108932 or ENSG00000118596 or ENSG00000141526 or ENSG00000155380 or ENSG00000168679 or ENSG00000170190
HMR_6047	Transport reactions	-1000	-1000	636.151	(R)-3-hydroxybutanoate[c] + acetoacetate[s] <=> (R)-3-hydroxybutanoate[s] + acetoacetate[c]	ENSG00000100156 or ENSG00000108932 or ENSG00000118596 or ENSG00000141526 or ENSG00000155380 or ENSG00000168679 or ENSG00000170190
HMR_7818	Transport reactions	897.645	1000	-1000	dGDP[c] + dTDP[m] <=> dGDP[m] + dTDP[c]	ENSG00000125454
HMR_9605	Transport reactions	61.7534	NA	NA	alanine[s] + H+[c] + Na+[s] => alanine[c] + H+[s] + Na+[c]	ENSG00000017483
HMR_5745	Transport reactions	155.857	NA	NA	cysteine[c] + Na+[s] + proline[s] => cysteine[s] + Na+[c] + proline[c]	ENSG00000103064
HMR_1901	Transport reactions	NA	1000	1000	glutathionyl-leukotriene C4[c] + HCO3-[c] + serotonin[s] <=> glutathionyl-leukotriene C4[s] + HCO3-[s] + serotonin[c]	ENSG00000021488 or ENSG00000084453 or ENSG00000111700
HMR_1602	Transport reactions	-104.327	-295.143	NA	5beta-cholestan-3alpha,7alpha,12alpha-triol[c] <=> 5beta-cholestan-3alpha,7alpha,12alpha-triol[m]
HMR_8867	Transport reactions	NA	NA	666.667	D-xylose[c] <=> D-xylose[s]	ENSG00000059804
HMR_5880	Transport reactions	NA	271.987	NA	histidine[c] + Na+[s] + proline[s] => histidine[s] + Na+[c] + proline[c]	ENSG00000103064
HMR_8889	Transport reactions	19.1469	NA	1000	betaine[s] + 2 Na+[s] => betaine[c] + 2 Na+[c]	ENSG00000111181
HMR_8670	Transport reactions	NA	127.196	898.803	2 chloride[s] + formate[c] => 2 chloride[c] + formate[s]	ENSG00000225697
HMR_5448	Transport reactions	1000	NA	NA	HCO3-[c] + 2 Na+[c] => HCO3-[s] + 2 Na+[s]	ENSG00000080493 or ENSG00000188687
HMR_7849	Transport reactions	NA	1000	NA	dGTP[c] + dUDP[m] => dGTP[m] + dUDP[c]	ENSG00000125454
HMR_5538	Transport reactions	NA	-1000	-1000	phenylalanine[c] + valine[s] <=> phenylalanine[s] + valine[c]	ENSG00000103257 or ENSG00000165029
HMR_6015	Transport reactions	1000	872.804	-1000	acetate[c] + pyruvate[s] <=> acetate[s] + pyruvate[c]	ENSG00000100156 or ENSG00000108932 or ENSG00000118596 or ENSG00000141526 or ENSG00000155380 or ENSG00000168679 or ENSG00000170190
HMR_5116	Transport reactions	NA	987.43	NA	phenylalanine[m] + H+[i] => H+[m] + phenylalanine[c]
HMR_5767	Transport reactions	NA	846.144	NA	glycine[c] + Na+[s] + valine[s] => glycine[s] + Na+[c] + valine[c]	ENSG00000103064
HMR_4882	Transport reactions	NA	54.0987	1000	uracil[c] <=> uracil[s]	ENSG00000174669
HMR_7822	Transport reactions	-897.645	-1000	1000	dCDP[c] + dTDP[m] <=> dCDP[m] + dTDP[c]	ENSG00000125454
HMR_1908	Transport reactions	NA	-1000	NA	dopamine[s] + HCO3-[c] + S-glutathionyl-2-4-dinitrobenzene[c] <=> dopamine[c] + HCO3-[s] + S-glutathionyl-2-4-dinitrobenzene[s]	ENSG00000021488 or ENSG00000084453 or ENSG00000111700
HMR_5581	Transport reactions	NA	-1000	-1000	citrulline[c] + lysine[s] <=> citrulline[s] + lysine[c]	ENSG00000103064 or ENSG00000103257
LKYNRtr2	Transport reactions	1000	-137.727	-472.17	phenylalanine[c] + kynurenine[s] <=> kynurenine[c] + phenylalanine[s]	ENSG00000092068
HMR_5586	Transport reactions	-1000	1000	NA	citrulline[c] + histidine[s] <=> citrulline[s] + histidine[c]	ENSG00000103064 or ENSG00000103257
PMTCRNte	Transport reactions	1000	NA	800.194	L-palmitoylcarnitine[c] + Na+[c] => Na+[s] + L-palmitoylcarnitine[s]	ENSG00000197375
HMR_6049	Transport reactions	1000	-1000	-1000	L-lactate[c] + retinoate[s] <=> L-lactate[s] + retinoate[c]	ENSG00000100156 or ENSG00000108932 or ENSG00000118596 or ENSG00000141526 or ENSG00000155380 or ENSG00000168679 or ENSG00000170190
CITtam	Transport reactions	NA	NA	1000	citrate[c] + malate[m] <=> citrate[m] + malate[c]	ENSG00000100075
HMR_7839	Transport reactions	NA	888.988	NA	dATP[c] + dUDP[m] => dATP[m] + dUDP[c]	ENSG00000125454
HMR_5866	Transport reactions	NA	NA	1000	citrulline[c] + Na+[s] + tyrosine[s] => citrulline[s] + Na+[c] + tyrosine[c]	ENSG00000103064
HMR_4985	Transport reactions	NA	1000	NA	guanine[c] <=> guanine[s]	ENSG00000174669
HMR_5843	Transport reactions	NA	728.013	NA	arginine[c] + Na+[s] + serine[s] => arginine[s] + Na+[c] + serine[c]	ENSG00000103064
HMR_4949	Transport reactions	-307.819	1000	1000	urea[c] <=> urea[s]	ENSG00000103569 or ENSG00000132874 or ENSG00000141469
HMR_5536	Transport reactions	-1000	-1000	1000	phenylalanine[c] + proline[s] <=> phenylalanine[s] + proline[c]	ENSG00000103257 or ENSG00000165029
HMR_4928	Transport reactions	649.828	NA	NA	H+[s] + pyruvate[s] => H+[c] + pyruvate[c]	ENSG00000100156 or ENSG00000108932 or ENSG00000118596 or ENSG00000141526 or ENSG00000155380 or ENSG00000168679 or ENSG00000170190
CE1918te	Transport reactions	NA	338.49	NA	AKG[c] + 5-hydroxytryptophol[s] <=> 5-hydroxytryptophol[c] + AKG[s]	ENSG00000149452 or ENSG00000197901
HMR_4874	Transport reactions	590.611	1000	-667.366	NH3[c] <=> NH3[m]
HMR_5580	Transport reactions	-1000	1000	1000	histidine[c] + lysine[s] <=> histidine[s] + lysine[c]	ENSG00000103064 or ENSG00000103257
HMR_1898	Transport reactions	NA	1000	NA	glutathionyl-leukotriene C4[c] + HCO3-[c] + noradrenaline[s] <=> glutathionyl-leukotriene C4[s] + HCO3-[s] + noradrenaline[c]	ENSG00000021488 or ENSG00000084453 or ENSG00000111700
HMR_5547	Transport reactions	NA	-1000	-1000	threonine[c] + tyrosine[s] <=> threonine[s] + tyrosine[c]	ENSG00000103257 or ENSG00000188687
HMR_0155	Transport reactions	NA	1000	NA	butyrate[s] <=> butyrate[c]	ENSG00000113396 or ENSG00000121769 or ENSG00000130304 or ENSG00000135218 or ENSG00000143554 or ENSG00000145384 or ENSG00000163586 or ENSG00000164434 or ENSG00000164687 or ENSG00000167114 or ENSG00000170231 or ENSG00000170323 or ENSG00000197416 or ENSG00000205186
HMR_5328	Transport reactions	NA	NA	264.759	aspartate[s] + Na+[s] => aspartate[c] + Na+[c]	ENSG00000079215 or ENSG00000105143 or ENSG00000106688 or ENSG00000110436 or ENSG00000178537
HMR_1903	Transport reactions	NA	-1000	-1000	HCO3-[c] + serotonin[s] + S-glutathionyl-ethacrynic acid[c] <=> HCO3-[s] + serotonin[c] + S-glutathionyl-ethacrynic acid[s]	ENSG00000021488 or ENSG00000084453 or ENSG00000111700
FDPte	Transport reactions	-1000	NA	-348.591	fructose-1,6-bisphosphate[c] <=> fructose-1,6-bisphosphate[s]
HMR_3916	Transport reactions	NA	791.574	507.568	5-methyl-THF[c] <=> 5-methyl-THF[s]	ENSG00000110195 or ENSG00000110203
HMR_5007	Transport reactions	NA	NA	106.881	folate[s] => folate[c]	ENSG00000110195 or ENSG00000110203 or ENSG00000165457
HMR_6044	Transport reactions	-1000	831.975	-1000	propanoate[c] + retinoate[s] <=> propanoate[s] + retinoate[c]	ENSG00000100156 or ENSG00000108932 or ENSG00000118596 or ENSG00000141526 or ENSG00000155380 or ENSG00000168679 or ENSG00000170190
HMR_1909	Transport reactions	NA	1000	-1000	dopamine[s] + HCO3-[c] + S-glutathionyl-ethacrynic acid[c] <=> dopamine[c] + HCO3-[s] + S-glutathionyl-ethacrynic acid[s]	ENSG00000021488 or ENSG00000084453 or ENSG00000111700
THFt2	Transport reactions	-1000	NA	NA	H2O[c] + THF[s] <=> H2O[s] + THF[c]	ENSG00000173638
HMR_5473	Transport reactions	-938.247	-271.987	145.692	alanine[c] + glutamine[s] <=> alanine[s] + glutamine[c]	ENSG00000103257 or ENSG00000130876 or ENSG00000168003
HMR_5296	Transport reactions	NA	NA	-199.806	methanol[c] <=> methanol[s]
HMR_6336	Transport reactions	102.355	NA	840.848	ADP[m] + dGDP[c] => ADP[c] + dGDP[m]	ENSG00000125454
HMR_5091	Transport reactions	1000	NA	NA	threonine[s] => threonine[c]	(ENSG00000092068 and ENSG00000168003) or ENSG00000003989 or ENSG00000103257 or ENSG00000123643 or ENSG00000130876 or ENSG00000139514 or ENSG00000149150 or ENSG00000155465 or ENSG00000165349 or ENSG00000167703
C51CRNtr	Transport reactions	NA	NA	1000	Tiglyl Carnitine[s] <=> Tiglyl Carnitine[c]
HMR_6022	Transport reactions	1000	-1000	-1000	acetate[s] + AKG[c] <=> acetate[c] + AKG[s]	ENSG00000100156 or ENSG00000108932 or ENSG00000118596 or ENSG00000141526 or ENSG00000155380 or ENSG00000168679 or ENSG00000170190
HMR_6530	Transport reactions	NA	169.245	NA	chloride[s] + 2 sulfate[c] => chloride[c] + 2 sulfate[s]	ENSG00000225697
HMR_4919	Transport reactions	-148.789	1000	1000	CO2[c] <=> CO2[s]
HMR_6018	Transport reactions	-1000	-872.804	NA	L-lactate[c] + pyruvate[s] <=> L-lactate[s] + pyruvate[c]	ENSG00000100156 or ENSG00000108932 or ENSG00000118596 or ENSG00000141526 or ENSG00000155380 or ENSG00000168679 or ENSG00000170190
HMR_6010	Transport reactions	478.04	1000	NA	2-hydroxybutyrate[c] + propanoate[s] <=> 2-hydroxybutyrate[s] + propanoate[c]	ENSG00000100156 or ENSG00000108932 or ENSG00000118596 or ENSG00000141526 or ENSG00000155380 or ENSG00000168679 or ENSG00000170190
ASPPROASCT1	Transport reactions	155.857	NA	NA	aspartate[s] + Na+[s] + proline[c] => aspartate[c] + Na+[c] + proline[s]	ENSG00000115902
HMR_5124	Transport reactions	NA	NA	502.316	glycine[c] <=> glycine[m]	ENSG00000144659
HMR_7824	Transport reactions	-1000	-1000	NA	dCDP[m] + dGDP[c] <=> dCDP[c] + dGDP[m]	ENSG00000125454
BETBGTtc	Transport reactions	-19.1469	NA	-1000	betaine[s] + chloride[s] + Na+[s] <=> betaine[c] + chloride[c] + Na+[c]	ENSG00000111181
HMR_6333	Transport reactions	NA	888.988	NA	ATP[m] + dGDP[c] => ATP[c] + dGDP[m]	ENSG00000125454
HMR_6382	Transport reactions	124.199	NA	NA	asparagine[s] + H+[c] + Na+[s] => asparagine[c] + H+[s] + Na+[c]	ENSG00000017483 or ENSG00000111371 or ENSG00000134294 or ENSG00000139209 or ENSG00000268104
ACRNte	Transport reactions	-819.85	188.727	1000	Na+[c] + O-acetylcarnitine[c] <=> Na+[s] + O-acetylcarnitine[s]	ENSG00000197375
HMR_5458	Transport reactions	1000	271.987	-102.25	alanine[c] + glycine[s] <=> alanine[s] + glycine[c]	ENSG00000103257 or ENSG00000130876 or ENSG00000168003
HMR_6007	Transport reactions	1000	NA	1000	2-hydroxybutyrate[c] + pyruvate[s] <=> 2-hydroxybutyrate[s] + pyruvate[c]	ENSG00000100156 or ENSG00000108932 or ENSG00000118596 or ENSG00000141526 or ENSG00000155380 or ENSG00000168679 or ENSG00000170190
HMR_4691	Transport reactions	990.427	NA	686.989	4-aminobutyrate[s] + 2 Na+[s] => 4-aminobutyrate[c] + 2 Na+[c]	ENSG00000010379 or ENSG00000111181 or ENSG00000132164 or ENSG00000157103
HMR_5684	Transport reactions	844.143	425.844	NA	cysteine[c] + Na+[s] + phenylalanine[s] => cysteine[s] + Na+[c] + phenylalanine[c]	ENSG00000103064
HMR_5533	Transport reactions	-1000	NA	-1000	phenylalanine[c] + tyrosine[s] <=> phenylalanine[s] + tyrosine[c]	ENSG00000103257 or ENSG00000165029
HMR_8861	Transport reactions	307.819	-1000	-1000	H2O[c] + urea[c] <=> H2O[s] + urea[s]	ENSG00000132874 or ENSG00000141469
HMR_6038	Transport reactions	-1000	1000	-1000	formate[s] + L-lactate[c] <=> formate[c] + L-lactate[s]	ENSG00000100156 or ENSG00000108932 or ENSG00000118596 or ENSG00000141526 or ENSG00000155380 or ENSG00000168679 or ENSG00000170190
HMR_5430	Transport reactions	441.031	NA	NA	H+[c] + Na+[s] => H+[s] + Na+[c]	ENSG00000066230 or ENSG00000090020 or ENSG00000115616 or ENSG00000135740 or ENSG00000180251 or ENSG00000181804
HMR_5070	Transport reactions	1000	-1000	-1000	histidine[c] <=> histidine[s]	(ENSG00000092068 and ENSG00000168003) or ENSG00000003989 or ENSG00000103257 or ENSG00000123643 or ENSG00000139514 or ENSG00000149150 or ENSG00000155465 or ENSG00000165349 or ENSG00000167703
HMR_6045	Transport reactions	1000	1000	NA	(R)-3-hydroxybutanoate[c] + propanoate[s] <=> (R)-3-hydroxybutanoate[s] + propanoate[c]	ENSG00000100156 or ENSG00000108932 or ENSG00000118596 or ENSG00000141526 or ENSG00000155380 or ENSG00000168679 or ENSG00000170190
HMR_7814	Transport reactions	-1000	1000	-1000	dCDP[c] + dUDP[m] <=> dCDP[m] + dUDP[c]	ENSG00000125454
TDCHOLAte	Transport reactions	NA	NA	13.0606	taurochenodeoxycholate[s] <=> taurochenodeoxycholate[c]
HMR_5639	Transport reactions	NA	NA	418.6	cysteine[c] + Na+[s] + serine[s] => cysteine[s] + Na+[c] + serine[c]	ENSG00000103064 or ENSG00000105281 or ENSG00000115902
RETINALt	Transport reactions	321.866	-168.025	NA	retinal[c] <=> retinal[s]
HMR_5664	Transport reactions	NA	728.013	NA	glutamine[c] + Na+[s] + tryptophan[s] => glutamine[s] + Na+[c] + tryptophan[c]	ENSG00000103064 or ENSG00000103257
HMR_8676	Transport reactions	819.85	-188.727	-1000	L-carnitine[c] <=> L-carnitine[s]	ENSG00000197208 or ENSG00000197375
HMR_7810	Transport reactions	1000	-888.988	NA	dGDP[c] + dUDP[m] <=> dGDP[m] + dUDP[c]	ENSG00000125454
HMR_5006	Transport reactions	NA	NA	502.316	folate[c] => folate[m]
HMR_1906	Transport reactions	NA	-1000	-1000	acetylcholine[s] + HCO3-[c] + S-glutathionyl-ethacrynic acid[c] <=> acetylcholine[c] + HCO3-[s] + S-glutathionyl-ethacrynic acid[s]	ENSG00000021488 or ENSG00000084453 or ENSG00000111700
HMR_6369	Transport reactions	1000	NA	1000	deoxyinosine[c] => deoxyinosine[s]	ENSG00000112759 or ENSG00000174669
HMR_8340	Transport reactions	NA	NA	-666.667	L-arabinose[c] <=> L-arabinose[s]
HDD2CRNte2	Transport reactions	NA	NA	1000	Na+[s] + hexadecenoylcarnitine(9)[s] => hexadecenoylcarnitine(9)[c] + Na+[c]	ENSG00000105281 or ENSG00000197375
HMR_6026	Transport reactions	-1000	-1000	40.274	AKG[c] + L-lactate[s] <=> AKG[s] + L-lactate[c]	ENSG00000100156 or ENSG00000108932 or ENSG00000118596 or ENSG00000141526 or ENSG00000155380 or ENSG00000168679 or ENSG00000170190
ALAyLATthc	Transport reactions	NA	NA	56.5024	alanine[s] + arginine[c] + H+[s] => alanine[c] + arginine[s] + H+[c]	(ENSG00000103064 and ENSG00000168003) or (ENSG00000155465 and ENSG00000168003)
HMR_7638	Transport reactions	NA	288.024	NA	H+[c] => H+[m]	ENSG00000102078 or ENSG00000109424 or ENSG00000153291 or ENSG00000175564 or ENSG00000175567
PCRNte	Transport reactions	NA	NA	1000	Na+[c] + O-propanoylcarnitine[c] => Na+[s] + O-propanoylcarnitine[s]	ENSG00000197375
HMR_5585	Transport reactions	-1000	1000	943.498	histidine[c] + ornithine[s] <=> histidine[s] + ornithine[c]	ENSG00000103064 or ENSG00000103257
DHAPtr	Transport reactions	NA	-845.465	NA	DHAP[s] <=> DHAP[c]
HMR_5122	Transport reactions	NA	295.143	278.055	glutamate[c] + H+[c] => glutamate[m] + H+[m]	ENSG00000177542 or ENSG00000182902
C4tmc	Transport reactions	NA	-211.142	NA	O-butanoylcarnitine[c] <=> O-butanoylcarnitine[m]	ENSG00000178537
HMR_1899	Transport reactions	NA	NA	-1000	HCO3-[c] + noradrenaline[s] + S-glutathionyl-2-4-dinitrobenzene[c] <=> HCO3-[s] + noradrenaline[c] + S-glutathionyl-2-4-dinitrobenzene[s]	ENSG00000021488 or ENSG00000084453 or ENSG00000111700
HMR_1900	Transport reactions	NA	-1000	1000	HCO3-[c] + noradrenaline[s] + S-glutathionyl-ethacrynic acid[c] <=> HCO3-[s] + noradrenaline[c] + S-glutathionyl-ethacrynic acid[s]	ENSG00000021488 or ENSG00000084453 or ENSG00000111700
HMR_1904	Transport reactions	NA	1000	1000	acetylcholine[s] + glutathionyl-leukotriene C4[c] + HCO3-[c] <=> acetylcholine[c] + glutathionyl-leukotriene C4[s] + HCO3-[s]	ENSG00000021488 or ENSG00000084453 or ENSG00000111700
ARGtm	Transport reactions	NA	1000	1000	arginine[c] + H+[m] <=> arginine[m] + H+[c]	ENSG00000102743 or ENSG00000120329
PHPYRtm	Transport reactions	NA	-987.43	NA	H+[m] + phenylpyruvate[m] <=> H+[c] + phenylpyruvate[c]	ENSG00000060762 and ENSG00000143158
HMR_4926	Transport reactions	327.963	NA	NA	H+[c] + pyruvate[c] => H+[m] + pyruvate[m]	ENSG00000060762 or ENSG00000143158 or ENSG00000238205
HDCECRNte	Transport reactions	NA	NA	199.806	Na+[c] + palmitoleoyl-carnitine[c] => Na+[s] + palmitoleoyl-carnitine[s]	ENSG00000197375
PEPtr	Transport reactions	1000	NA	NA	HCO3-[s] + PEP[c] <=> HCO3-[c] + PEP[s]
HMR_5777	Transport reactions	NA	NA	1000	Na+[s] + proline[c] + valine[s] => Na+[c] + proline[s] + valine[c]	ENSG00000103064
HMR_4957	Transport reactions	32.6573	NA	165.05	citrate[m] => citrate[c]
HMR_4321	Transport reactions	-183.209	NA	-11.0308	fructose[c] <=> fructose[s]	ENSG00000109667 or ENSG00000133460 or ENSG00000136856 or ENSG00000142583 or ENSG00000163581 or ENSG00000197241
HMR_4964	Transport reactions	NA	NA	1000	citrate[m] + H+[m] + malate[c] => citrate[c] + H+[c] + malate[m]	ENSG00000100075
HMR_4914	Transport reactions	1000	788.858	NA	CoA[c] <=> CoA[m]	ENSG00000122912 or ENSG00000181035
HMR_4898	Transport reactions	NA	NA	1000	O2[c] <=> O2[m]
HMR_6034	Transport reactions	1000	-1000	-1000	acetate[c] + butyrate[s] <=> acetate[s] + butyrate[c]	ENSG00000100156 or ENSG00000108932 or ENSG00000118596 or ENSG00000141526 or ENSG00000155380 or ENSG00000168679 or ENSG00000170190
NAHCO3_HCLt	Transport reactions	-1000	423.638	110.617	chloride[c] + H+[c] + HCO3-[s] + Na+[s] <=> chloride[s] + H+[s] + HCO3-[c] + Na+[c]	ENSG00000050438 or ENSG00000144290
ICITtr	Transport reactions	147.492	NA	NA	isocitrate[s] <=> isocitrate[c]
HMR_5527	Transport reactions	-1000	-728.013	NA	proline[c] + tryptophan[s] <=> proline[s] + tryptophan[c]	ENSG00000103257 or ENSG00000165029
HMR_5037	Transport reactions	1000	-438.944	1000	guanosine[c] <=> guanosine[s]	ENSG00000112759 or ENSG00000174669
HMR_1907	Transport reactions	NA	NA	1000	dopamine[s] + glutathionyl-leukotriene C4[c] + HCO3-[c] <=> dopamine[c] + glutathionyl-leukotriene C4[s] + HCO3-[s]	ENSG00000021488 or ENSG00000084453 or ENSG00000111700
HMR_5996	Transport reactions	NA	NA	47.571	citrate[s] + 3 Na+[s] => citrate[c] + 3 Na+[c]	ENSG00000103064 or ENSG00000158296
HMR_8586	Transport reactions	NA	NA	-327.818	maltose[c] <=> maltose[s]	ENSG00000059804
HMR_6035	Transport reactions	-1000	-1000	1000	acetate[c] + retinoate[s] <=> acetate[s] + retinoate[c]	ENSG00000100156 or ENSG00000108932 or ENSG00000118596 or ENSG00000141526 or ENSG00000155380 or ENSG00000168679 or ENSG00000170190
HMR_5470	Transport reactions	-1000	NA	-1000	glycine[c] + threonine[s] <=> glycine[s] + threonine[c]	ENSG00000103257 or ENSG00000130876 or ENSG00000168003
HMR_7806	Transport reactions	-1000	-1000	159.152	dADP[m] + dGDP[c] <=> dADP[c] + dGDP[m]	ENSG00000125454
HMR_5432	Transport reactions	NA	423.638	123.678	HCO3-[c] + Na+[c] => HCO3-[s] + Na+[s]	ENSG00000033867
HMR_6048	Transport reactions	-1000	-1000	1000	butyrate[s] + L-lactate[c] <=> butyrate[c] + L-lactate[s]	ENSG00000100156 or ENSG00000108932 or ENSG00000118596 or ENSG00000141526 or ENSG00000155380 or ENSG00000168679 or ENSG00000170190
r0946	Transport reactions	NA	-1000	-1000	citrulline[c] + ornithine[s] <=> citrulline[s] + ornithine[c]	ENSG00000021488
HMR_5497	Transport reactions	-1000	-1000	NA	glutamine[c] + threonine[s] <=> glutamine[s] + threonine[c]	ENSG00000103257 or ENSG00000130876 or ENSG00000168003
HMR_6023	Transport reactions	1000	-1000	174.898	AKG[c] + formate[s] <=> AKG[s] + formate[c]	ENSG00000100156 or ENSG00000108932 or ENSG00000118596 or ENSG00000141526 or ENSG00000155380 or ENSG00000168679 or ENSG00000170190
HMR_6025	Transport reactions	-1000	1000	-1000	acetoacetate[s] + AKG[c] <=> acetoacetate[c] + AKG[s]	ENSG00000100156 or ENSG00000108932 or ENSG00000118596 or ENSG00000141526 or ENSG00000155380 or ENSG00000168679 or ENSG00000170190
HMR_5895	Transport reactions	1000	NA	NA	histidine[c] + Na+[s] + threonine[s] => histidine[s] + Na+[c] + threonine[c]	ENSG00000103064
HMR_6024	Transport reactions	-478.04	831.975	1000	AKG[c] + propanoate[s] <=> AKG[s] + propanoate[c]	ENSG00000100156 or ENSG00000108932 or ENSG00000118596 or ENSG00000141526 or ENSG00000155380 or ENSG00000168679 or ENSG00000170190
ACRNtm	Transport reactions	1000	422.284	-563.275	O-acetylcarnitine[c] <=> O-acetylcarnitine[m]	ENSG00000178537
HMR_6384	Transport reactions	704.695	NA	NA	H+[c] + histidine[s] + Na+[s] => H+[s] + histidine[c] + Na+[c]	ENSG00000017483 or ENSG00000134294 or ENSG00000268104
LKYNRtr	Transport reactions	-1000	137.727	472.17	kynurenine[s] <=> kynurenine[c]	ENSG00000149150 or ENSG00000167703
HMR_9604	Transport reactions	9.57343	NA	NA	4-aminobutyrate[s] + 2 chloride[s] + 3 Na+[s] => 4-aminobutyrate[c] + 2 chloride[c] + 3 Na+[c]	ENSG00000111181
HMR_5008	Transport reactions	NA	561.056	-677.779	deoxyuridine[c] <=> deoxyuridine[s]	ENSG00000112759 or ENSG00000174669
HMR_8917	Transport reactions	1000	NA	NA	lysine[s] + Na+[s] => lysine[c] + Na+[c]	ENSG00000197375 or ENSG00000268104
HMR_7812	Transport reactions	NA	-1000	1000	dADP[c] + dUDP[m] <=> dADP[m] + dUDP[c]	ENSG00000125454
HMR_3950	Transport reactions	NA	NA	-502.316	5,10-methylene-THF[c] <=> 5,10-methylene-THF[m]
TREt	Transport reactions	NA	182.896	NA	trehalose[s] <=> trehalose[c]
GABABGTtc	Transport reactions	-1000	NA	-686.989	4-aminobutyrate[s] + chloride[s] + Na+[s] <=> 4-aminobutyrate[c] + chloride[c] + Na+[c]	ENSG00000111181
HMR_1620	Transport reactions	104.327	295.143	NA	3alpha,7alpha,12alpha-trihydroxy-5beta-cholestanate[c] <=> 3alpha,7alpha,12alpha-trihydroxy-5beta-cholestanate[m]	ENSG00000083807 or ENSG00000140284
5HOXINDOAtr	Transport reactions	NA	-338.49	NA	sulfate[c] + 5-hydroxyindoleacetate[s] <=> 5-hydroxyindoleacetate[c] + sulfate[s]	ENSG00000004939
HMR_7842	Transport reactions	1000	NA	1000	dCTP[c] + dUDP[m] => dCTP[m] + dUDP[c]	ENSG00000125454
HMR_4456	Tricarboxylic acid cycle and glyoxylate/dicarboxylate metabolism	-32.6573	-436.429	1000	citrate[m] <=> isocitrate[m]	ENSG00000100412 or ENSG00000122729
HMR_4149	Tricarboxylic acid cycle and glyoxylate/dicarboxylate metabolism	180.15	NA	212.621	ATP[c] + citrate[c] + CoA[c] => acetyl-CoA[c] + ADP[c] + OAA[c] + Pi[c]	ENSG00000131473
HMR_4454	Tricarboxylic acid cycle and glyoxylate/dicarboxylate metabolism	-147.492	NA	NA	citrate[c] <=> isocitrate[c]	ENSG00000122729 or ENSG00000136381
HMR_4458	Tricarboxylic acid cycle and glyoxylate/dicarboxylate metabolism	-1000	-1000	671.823	cis-aconitate[m] + H2O[m] <=> citrate[m]	ENSG00000100412 or ENSG00000122729
HMR_3957	Tricarboxylic acid cycle and glyoxylate/dicarboxylate metabolism	NA	NA	328.177	isocitrate[m] + NAD+[m] => AKG[m] + CO2[m] + NADH[m]	ENSG00000067829 or ENSG00000101365 or ENSG00000166411
HMR_4112	Tricarboxylic acid cycle and glyoxylate/dicarboxylate metabolism	967.343	NA	NA	H+[m] + oxalosuccinate[m] => AKG[m] + CO2[m]	ENSG00000138413 or ENSG00000182054
HMR_3958	Tricarboxylic acid cycle and glyoxylate/dicarboxylate metabolism	NA	563.571	NA	isocitrate[m] + NADP+[m] => AKG[m] + CO2[m] + NADPH[m]	ENSG00000138413 or ENSG00000182054
HMR_4410	Tricarboxylic acid cycle and glyoxylate/dicarboxylate metabolism	-219.616	137.727	-499.125	fumarate[m] + H2O[m] <=> malate[m]	ENSG00000091483
HMR_4589	Tricarboxylic acid cycle and glyoxylate/dicarboxylate metabolism	1000	1000	-671.823	cis-aconitate[m] + H2O[m] <=> isocitrate[m]	ENSG00000100412 or ENSG00000122729
HMR_4139	Tricarboxylic acid cycle and glyoxylate/dicarboxylate metabolism	-71.6696	3.55965	1000	H+[c] + NADH[c] + OAA[c] <=> malate[c] + NAD+[c]	ENSG00000014641 or ENSG00000138400
RE2426C	Tryptophan metabolism	-1000	NA	NA	H2O[c] + melatonin[c] <=> 6-hydroxymelatonin[c] + 2 H+[c]
HMR_8566	Tryptophan metabolism	1000	NA	NA	H+[c] + melatonin[c] + NADPH[c] + O2[c] => 6-hydroxymelatonin[c] + H2O[c] + NADP+[c]	ENSG00000138061 or ENSG00000140465 or ENSG00000140505 or ENSG00000165841
HMR_3935	Tyrosine metabolism	-1000	1000	-800.194	formaldehyde[c] + GSH[c] <=> hydroxymethylglutathione[c]	ENSG00000117305
HMR_8530	Tyrosine metabolism	1000	-1000	1000	formaldehyde[c] + GSH[c] + NAD+[c] <=> formylglutathione[c] + H+[c] + NADH[c]	ENSG00000147576 or ENSG00000172955 or ENSG00000187758 or ENSG00000196344 or ENSG00000196616 or ENSG00000197894 or ENSG00000198099 or ENSG00000248144
HMR_4687	Tyrosine metabolism	774.392	NA	NA	2 H+[m] + NADPH[m] + phenylacetate[m] <=> H2O[m] + NADP+[m] + phenylacetaldehyde[m]	ENSG00000006534 or ENSG00000108602 or ENSG00000132746 or ENSG00000184254
HMR_4685	Tyrosine metabolism	774.392	NA	NA	H2O[m] + NAD+[m] + phenylacetaldehyde[m] => 2 H+[m] + NADH[m] + phenylacetate[m]	ENSG00000006534 or ENSG00000108602 or ENSG00000132746 or ENSG00000184254
HMR_3796	Valine, leucine, and isoleucine metabolism	-1000	-1000	1000	AMP[m] + H+[m] + propanoyl-CoA[m] <=> CoA[m] + propinol adenylate[m]	ENSG00000111058 or ENSG00000131069 or ENSG00000154930
HMR_3785	Valine, leucine, and isoleucine metabolism	NA	NA	1000	H2O[m] + tiglyl-CoA[m] => (S)-3-hydroxy-2-methylbutyryl-CoA[m]	ENSG00000084754 and ENSG00000113790 and ENSG00000127884
HMR_3751	Valine, leucine, and isoleucine metabolism	211.831	1000	NA	isobutyryl-CoA[m] + ubiquinone[m] => methacrylyl-CoA[m] + ubiquinol[m]	ENSG00000122971 or ENSG00000196177
HMR_3206	Valine, leucine, and isoleucine metabolism	NA	NA	1000	2-methylacetoacetyl-CoA[m] + CoA[m] => acetyl-CoA[m] + propanoyl-CoA[m]	ENSG00000084754 and ENSG00000138029 and ENSG00000167315
HMR_3823	Valine, leucine, and isoleucine metabolism	NA	NA	1000	(S)-3-hydroxy-2-methylbutyryl-CoA[m] + NAD+[m] <=> 2-methylacetoacetyl-CoA[m] + H+[m] + NADH[m]	ENSG00000072506 or ENSG00000138796

## Sheet: ART Unique Reactions
RXN_ID	SubSystem	ART	EC	HC	EQN
HMR_3829	Alanine, aspartate and glutamate metabolism	-251.819	3.55965	787.379	AKG[c] + aspartate[c] <=> glutamate[c] + OAA[c]
HMR_4300	Amino sugar and nucleotide sugar metabolism	61.7534	0	0	fructose-6-phosphate[c] + glutamine[c] => glucosamine-6-phosphate[c] + glutamate[c]
HMR_4299	Amino sugar and nucleotide sugar metabolism	61.7534	0	0	glucosamine-6-phosphate[c] + H2O[c] => fructose-6-phosphate[c] + H+[c] + NH3[c]
HMR_3956	Arginine and proline metabolism	327.963	0	0	CO2[m] + H2O[m] => H+[m] + HCO3-[m]
RE1804M	Bile acid biosynthesis	-1000	0	0	5beta-cholestane-3alpha,7alpha,26-triol[m] + NAD+[m] <=> 3alpha,7alpha-dihydroxy-5beta-cholestan-26-al[m] + H+[m] + NADH[m]
HMR_1685	Bile acid biosynthesis	1000	0	0	5beta-cholestane-3alpha,7alpha,26-triol[m] + NADP+[m] => 3alpha,7alpha-dihydroxy-5beta-cholestan-26-al[m] + H+[m] + NADPH[m]
HMR_2666	Carnitine shuttle (cytosolic)	-1000	1000	1000	(9E)-octadecenoyl-CoA[c] + L-carnitine[c] <=> (9E)-octadecenoylcarnitine[c] + CoA[c]
HMR_2655	Carnitine shuttle (mitochondrial)	-1000	1000	1000	L-carnitine[c] + stearoylcarnitine[m] <=> L-carnitine[m] + stearoylcarnitine[c]
HMR_0267	Fatty acid activation (cytosolic)	1000	-1000	-1000	(9E)-octadecenoyl-CoA[c] + AMP[c] + PPi[c] <=> ATP[c] + CoA[c] + elaidate[c]
HMR_0226	Fatty acid activation (cytosolic)	1000	0	0	AMP[c] + palmitoleoyl-CoA[c] + PPi[c] <=> ATP[c] + CoA[c] + palmitolate[c]
C180CRNt	Fatty acid oxidation	-1000	1000	1000	stearoylcarnitine[c] <=> stearoylcarnitine[m]
FACOAL1813	Fatty acid oxidation	1000	-1000	-1000	ATP[c] + CoA[c] + elaidate[c] <=> (2E)-octadecenoyl-CoA[c] + AMP[c] + PPi[c]
ELAIDCPT1	Fatty acid oxidation	1000	-1000	-1000	(2E)-octadecenoyl-CoA[c] + L-carnitine[c] <=> (9E)-octadecenoylcarnitine[c] + CoA[c]
r1252	Fatty acid oxidation	1000	0	0	ATP[c] + CoA[c] + palmitolate[c] => AMP[c] + PPi[c] + (2E)-hexadecenoyl-CoA[c]
C161CPT12	Fatty acid oxidation	1000	0	0	L-carnitine[c] + (2E)-hexadecenoyl-CoA[c] <=> CoA[c] + hexadecenoylcarnitine(9)[c]
HMR_7748	Glycolysis / Gluconeogenesis	-1000	1000	1000	beta-D-glucose-6-phosphate[c] <=> glucose-6-phosphate[c]
HMR_4355	Glycolysis / Gluconeogenesis	363.358	0	0	DHAP[c] + erythrose-4-phosphate[c] => sedoheptulose-1,7-bisphosphate[c]
HMR_4381	Glycolysis / Gluconeogenesis	1000	-1000	-1000	fructose-6-phosphate[c] <=> glucose-6-phosphate[c]
HMR_7749	Glycolysis / Gluconeogenesis	1000	-1000	-333.333	beta-D-glucose-6-phosphate[c] <=> fructose-6-phosphate[c]
HMR_8453	Nucleotide metabolism	-1000	1000	1000	2 dCDP[n] <=> dCMP[n] + dCTP[n]
HMR_7868	Nucleotide metabolism	-1000	1000	1000	GDP[n] + UDP[n] <=> GTP[n] + UMP[n]
HMR_7876	Nucleotide metabolism	-1000	1000	1000	ADP[n] + UDP[n] <=> ATP[n] + UMP[n]
HMR_8466	Nucleotide metabolism	-1000	1000	1000	2 CDP[n] <=> CMP[n] + CTP[n]
HMR_8455	Nucleotide metabolism	-1000	1000	1000	dADP[n] + dCDP[n] <=> dATP[n] + dCMP[n]
HMR_3967	Nucleotide metabolism	-1000	1000	836.931	CDP[c] + GDP[c] <=> CMP[c] + GTP[c]
HMR_7800	Nucleotide metabolism	1000	-305.506	-1000	ADP[c] + GDP[c] <=> AMP[c] + GTP[c]
HMR_8472	Nucleotide metabolism	1000	-1000	-1000	CDP[n] + dCDP[n] <=> CMP[n] + dCTP[n]
HMR_7870	Nucleotide metabolism	1000	-1000	-1000	dADP[n] + UDP[n] <=> dATP[n] + UMP[n]
HMR_8459	Nucleotide metabolism	1000	-1000	-1000	ADP[n] + dCDP[n] <=> ATP[n] + dCMP[n]
HMR_7874	Nucleotide metabolism	1000	0	0	dGDP[n] + UDP[n] <=> dGTP[n] + UMP[n]
HMR_7864	Nucleotide metabolism	1000	0	0	CDP[n] + UDP[n] <=> CTP[n] + UMP[n]
HMR_8463	Nucleotide metabolism	1000	0	0	CDP[c] + dCDP[c] <=> CTP[c] + dCMP[c]
HMR_8462	Nucleotide metabolism	1000	0	0	dCDP[n] + GDP[n] <=> dCMP[n] + GTP[n]
HMR_6916	Oxidative phosphorylation	411.437	0	0	ADP[m] + Pi[m] + 3 H+[i] => ATP[m] + 2 H+[m] + H2O[m]
HMR_4489	Purine metabolism	183.209	0	0	dATP[c] + fructose[c] => dADP[c] + fructose-6-phosphate[c] + H+[c]
HMR_4016	Purine metabolism	1000	-690.351	-1000	ADP[c] + GTP[c] <=> ATP[c] + GDP[c]
HMR_4006	Pyrimidine metabolism	363.358	-1000	-1000	ADP[c] + UTP[c] <=> ATP[c] + UDP[c]
HMR_4143	Pyruvate metabolism	327.963	0	0	ATP[m] + HCO3-[m] + pyruvate[m] => ADP[m] + H+[m] + OAA[m] + Pi[m]
HMR_8698	Retinol metabolism	321.866	0	0	2 H+[c] + NADPH[c] + retinoate[c] <=> H2O[c] + NADP+[c] + retinal[c]
HMR_0766	Sphingolipid metabolism	213.15	0	0	galactose[s] + glucosylceramide pool[s] => H2O[s] + LacCer pool[s]
HMR_5580	Transport reactions	-1000	1000	1000	histidine[c] + lysine[s] <=> histidine[s] + lysine[c]
HMR_5585	Transport reactions	-1000	1000	943.498	histidine[c] + ornithine[s] <=> histidine[s] + ornithine[c]
NAHCO3_HCLt	Transport reactions	-1000	423.638	110.617	chloride[c] + H+[c] + HCO3-[s] + Na+[s] <=> chloride[s] + H+[s] + HCO3-[c] + Na+[c]
LKYNRtr	Transport reactions	-1000	137.727	472.17	kynurenine[s] <=> kynurenine[c]
THFt2	Transport reactions	-1000	0	0	H2O[c] + THF[s] <=> H2O[s] + THF[c]
ACRNte	Transport reactions	-819.85	188.727	1000	Na+[c] + O-acetylcarnitine[c] <=> Na+[s] + O-acetylcarnitine[s]
HMR_6024	Transport reactions	-478.04	831.975	1000	AKG[c] + propanoate[s] <=> AKG[s] + propanoate[c]
HMR_4949	Transport reactions	-307.819	1000	1000	urea[c] <=> urea[s]
HMR_4919	Transport reactions	-148.789	1000	1000	CO2[c] <=> CO2[s]
HMR_9604	Transport reactions	9.57343	0	0	4-aminobutyrate[s] + 2 chloride[s] + 3 Na+[s] => 4-aminobutyrate[c] + 2 chloride[c] + 3 Na+[c]
HMR_9605	Transport reactions	61.7534	0	0	alanine[s] + H+[c] + Na+[s] => alanine[c] + H+[s] + Na+[c]
HMR_6382	Transport reactions	124.199	0	0	asparagine[s] + H+[c] + Na+[s] => asparagine[c] + H+[s] + Na+[c]
ICITtr	Transport reactions	147.492	0	0	isocitrate[s] <=> isocitrate[c]
HMR_5745	Transport reactions	155.857	0	0	cysteine[c] + Na+[s] + proline[s] => cysteine[s] + Na+[c] + proline[c]
ASPPROASCT1	Transport reactions	155.857	0	0	aspartate[s] + Na+[s] + proline[c] => aspartate[c] + Na+[c] + proline[s]
HMR_8861	Transport reactions	307.819	-1000	-1000	H2O[c] + urea[c] <=> H2O[s] + urea[s]
HMR_4926	Transport reactions	327.963	0	0	H+[c] + pyruvate[c] => H+[m] + pyruvate[m]
HMR_5430	Transport reactions	441.031	0	0	H+[c] + Na+[s] => H+[s] + Na+[c]
HMR_4928	Transport reactions	649.828	0	0	H+[s] + pyruvate[s] => H+[c] + pyruvate[c]
HMR_6384	Transport reactions	704.695	0	0	H+[c] + histidine[s] + Na+[s] => H+[s] + histidine[c] + Na+[c]
HMR_8676	Transport reactions	819.85	-188.727	-1000	L-carnitine[c] <=> L-carnitine[s]
LKYNRtr2	Transport reactions	1000	-137.727	-472.17	phenylalanine[c] + kynurenine[s] <=> kynurenine[c] + phenylalanine[s]
HMR_6049	Transport reactions	1000	-1000	-1000	L-lactate[c] + retinoate[s] <=> L-lactate[s] + retinoate[c]
HMR_6022	Transport reactions	1000	-1000	-1000	acetate[s] + AKG[c] <=> acetate[c] + AKG[s]
HMR_5070	Transport reactions	1000	-1000	-1000	histidine[c] <=> histidine[s]
HMR_6034	Transport reactions	1000	-1000	-1000	acetate[c] + butyrate[s] <=> acetate[s] + butyrate[c]
HMR_5662	Transport reactions	1000	0	0	glycine[c] + Na+[s] + tryptophan[s] => glycine[s] + Na+[c] + tryptophan[c]
HDCECRNtr	Transport reactions	1000	0	0	palmitoleoyl-carnitine[s] <=> palmitoleoyl-carnitine[c]
HMR_5448	Transport reactions	1000	0	0	HCO3-[c] + 2 Na+[c] => HCO3-[s] + 2 Na+[s]
HMR_5091	Transport reactions	1000	0	0	threonine[s] => threonine[c]
PEPtr	Transport reactions	1000	0	0	HCO3-[s] + PEP[c] <=> HCO3-[c] + PEP[s]
HMR_5895	Transport reactions	1000	0	0	histidine[c] + Na+[s] + threonine[s] => histidine[s] + Na+[c] + threonine[c]
HMR_8917	Transport reactions	1000	0	0	lysine[s] + Na+[s] => lysine[c] + Na+[c]
HMR_4454	Tricarboxylic acid cycle and glyoxylate/dicarboxylate metabolism	-147.492	0	0	citrate[c] <=> isocitrate[c]
HMR_4139	Tricarboxylic acid cycle and glyoxylate/dicarboxylate metabolism	-71.6696	3.55965	1000	H+[c] + NADH[c] + OAA[c] <=> malate[c] + NAD+[c]
HMR_4112	Tricarboxylic acid cycle and glyoxylate/dicarboxylate metabolism	967.343	0	0	H+[m] + oxalosuccinate[m] => AKG[m] + CO2[m]
RE2426C	Tryptophan metabolism	-1000	0	0	H2O[c] + melatonin[c] <=> 6-hydroxymelatonin[c] + 2 H+[c]
HMR_8566	Tryptophan metabolism	1000	0	0	H+[c] + melatonin[c] + NADPH[c] + O2[c] => 6-hydroxymelatonin[c] + H2O[c] + NADP+[c]
HMR_4687	Tyrosine metabolism	774.392	0	0	2 H+[m] + NADPH[m] + phenylacetate[m] <=> H2O[m] + NADP+[m] + phenylacetaldehyde[m]
HMR_4685	Tyrosine metabolism	774.392	0	0	H2O[m] + NAD+[m] + phenylacetaldehyde[m] => 2 H+[m] + NADH[m] + phenylacetate[m]
